# Supplementary material for: Contamination detection in sequencing studies using the mitochondrial phylogeny
Source: HighWire-hosted journal article supplement (doi:10.1101/gr.256545.119), 2021-01-15
Supplement: Supplemental_code.zip [file Verifybam.xlsx]

## Sheet: Tabelle1
verifybamid_id	SampleID	sample		read_group	type	free_contam	chip_contam	snps	avg_depth	free_ref_bias_ref_het	free_ref_bias_refhomalt	chip_ref_bias_ref_het	chip_ref_bias_refhomalt	depth_homref_site	rel_depth_het_site	vcf	verdict	performed	name		SampleID
10390	NA11993.mapped.ILLUMINA.bwa.CEU.low_coverage.20121211.bam	NA11993	0	ALL	BAM	0.74756	0.26551	1400785	14.75	0.51251	0.00178	0.51006	0.00307	14.76	0.9996	CEU.omni_wg_2141_filtered.vcf.gz	HIGH_CHIP_MIX	2013-05-16 18:57:25	/nfs/1000g-archive/vol1/ftp/data/NA11993/alignment/NA11993.mapped.ILLUMINA.bwa.CEU.low_coverage.20121211.bam		NA11993.mapped.ILLUMINA.bwa.CEU.low_coverage.20121211.bam
44378	HG03721.mapped.ILLUMINA.bwa.ITU.low_coverage.20130415.bam	HG03721	0	ALL	BAM	0.58602	0.45039	781365	10.73	0.50428	0.00026	0.50341	0.00032	10.761	0.9968	ITU.wgs.coriell_phase3_samples.20121126.snps.affy_6.genotypes.vcf.gz	HIGH_CHIP_MIX	2013-05-10 12:17:46	/nfs/1000g-archive/vol1/ftp/data/HG03721/alignment/HG03721.mapped.ILLUMINA.bwa.ITU.low_coverage.20130415.bam		HG03721.mapped.ILLUMINA.bwa.ITU.low_coverage.20130415.bam
44431	HG03725.mapped.ILLUMINA.bwa.ITU.low_coverage.20130415.bam	HG03725	0	ALL	BAM	0.56518	0.51669	781365	10.2	0.50363	0.00021	0.50415	0.00036	10.204	1.0075	ITU.wgs.coriell_phase3_samples.20121126.snps.affy_6.genotypes.vcf.gz	HIGH_CHIP_MIX	2013-05-10 12:32:24	/nfs/1000g-archive/vol1/ftp/data/HG03725/alignment/HG03725.mapped.ILLUMINA.bwa.ITU.low_coverage.20130415.bam		HG03725.mapped.ILLUMINA.bwa.ITU.low_coverage.20130415.bam
12649	HG03723.mapped.ILLUMINA.bwa.ITU.low_coverage.20121211.bam	HG03723	0	ALL	BAM	0.37647	0.61658	781365	6.03	0.49948	5e-05	0.50108	2e-05	6.047	0.9961	ITU.wgs.coriell_phase3_samples.20121126.snps.affy_6.genotypes.vcf.gz	HIGH_CHIP_MIX	2013-05-16 07:06:28	/nfs/1000g-archive/vol1/ftp/data/HG03723/alignment/HG03723.mapped.ILLUMINA.bwa.ITU.low_coverage.20121211.bam		HG03723.mapped.ILLUMINA.bwa.ITU.low_coverage.20121211.bam
46621	HG03725.mapped.ILLUMINA.bwa.ITU.low_coverage.20130415.bam	HG03725	0	ALL	BAM	0.33812	0	1753219	10.01	0.50005	1e-05	0	0	0	0	ALL.omni_wg_2141_filtered.vcf.gz	HIGH_FREE_MIX	2013-05-10 13:56:42	/nfs/1000g-archive/vol1/ftp/data/HG03725/alignment/HG03725.mapped.ILLUMINA.bwa.ITU.low_coverage.20130415.bam		HG03725.mapped.ILLUMINA.bwa.ITU.low_coverage.20130415.bam
46518	HG03721.mapped.ILLUMINA.bwa.ITU.low_coverage.20130415.bam	HG03721	0	ALL	BAM	0.33672	0	1753219	10.54	0.50048	0	0	0	0	0	ALL.omni_wg_2141_filtered.vcf.gz	HIGH_FREE_MIX	2013-05-10 13:48:10	/nfs/1000g-archive/vol1/ftp/data/HG03721/alignment/HG03721.mapped.ILLUMINA.bwa.ITU.low_coverage.20130415.bam		HG03721.mapped.ILLUMINA.bwa.ITU.low_coverage.20130415.bam
12309	HG03723.mapped.ILLUMINA.bwa.ITU.low_coverage.20121211.bam	HG03723	0	ALL	BAM	0.2768	0	1753219	5.87	0.50607	1e-05	0	0	0	0	ALL.omni_wg_2141_filtered.vcf.gz	HIGH_FREE_MIX	2013-05-17 11:39:34	/nfs/1000g-archive/vol1/ftp/data/HG03723/alignment/HG03723.mapped.ILLUMINA.bwa.ITU.low_coverage.20121211.bam		HG03723.mapped.ILLUMINA.bwa.ITU.low_coverage.20121211.bam
13027	NA11993.mapped.ILLUMINA.bwa.CEU.low_coverage.20121211.bam	NA11993	0	ALL	BAM	0.20757	0	887456	14.91	0.5112	0.00037	0	0	0	0	ALL.wgs.coriell_phase3_samples.20121126.snps.affy_6.genotypes.vcf.gz	HIGH_FREE_MIX	2013-05-16 11:59:04	/nfs/1000g-archive/vol1/ftp/data/NA11993/alignment/NA11993.mapped.ILLUMINA.bwa.CEU.low_coverage.20121211.bam		NA11993.mapped.ILLUMINA.bwa.CEU.low_coverage.20121211.bam
33598	NA18576.mapped.ILLUMINA.bwa.CHB.low_coverage.20130415.bam	NA18576	0	ALL	BAM	0.11439	0.11325	1252142	8.39	0.50667	0.00948	0.50384	0.01044	8.401	0.999	CHB.omni_wg_2141_filtered.vcf.gz	HIGH_CHIP_MIX	2013-05-08 03:49:53	/nfs/1000g-archive/vol1/ftp/data/NA18576/alignment/NA18576.mapped.ILLUMINA.bwa.CHB.low_coverage.20130415.bam		NA18576.mapped.ILLUMINA.bwa.CHB.low_coverage.20130415.bam
17467	HG00098.mapped.ILLUMINA.bwa.GBR.low_coverage.20130415.bam	HG00098	0	ALL	BAM	0.10294	0.09578	1389642	5.14	0.50312	0.00056	0.50258	0.00087	5.144	1.0015	GBR.omni_wg_2141_filtered.vcf.gz	HIGH_CHIP_MIX	2013-04-30 23:29:09	/nfs/1000g-archive/vol1/ftp/data/HG00098/alignment/HG00098.mapped.ILLUMINA.bwa.GBR.low_coverage.20130415.bam		HG00098.mapped.ILLUMINA.bwa.GBR.low_coverage.20130415.bam
20924	HG02567.mapped.ILLUMINA.bwa.GWD.low_coverage.20130415.bam	HG02567	0	ALL	BAM	0.08835	0.09291	840560	8.11	0.50167	0.00131	0.50123	0.00126	8.064	1.0267	GWD.wgs.coriell_phase3_samples.20121126.snps.affy_6.genotypes.vcf.gz	HIGH_CHIP_MIX	2013-05-03 05:41:35	/nfs/1000g-archive/vol1/ftp/data/HG02567/alignment/HG02567.mapped.ILLUMINA.bwa.GWD.low_coverage.20130415.bam		HG02567.mapped.ILLUMINA.bwa.GWD.low_coverage.20130415.bam
32047	NA18576.mapped.ILLUMINA.bwa.CHB.low_coverage.20130415.bam	NA18576	0	ALL	BAM	0.07881	0	887456	8.56	0.50237	0.00099	0	0	0	0	ALL.wgs.coriell_phase3_samples.20121126.snps.affy_6.genotypes.vcf.gz	HIGH_FREE_MIX	2013-05-08 01:42:21	/nfs/1000g-archive/vol1/ftp/data/NA18576/alignment/NA18576.mapped.ILLUMINA.bwa.CHB.low_coverage.20130415.bam		NA18576.mapped.ILLUMINA.bwa.CHB.low_coverage.20130415.bam
20913	HG02525.mapped.ILLUMINA.bwa.KHV.low_coverage.20130415.bam	HG02525	0	ALL	BAM	0.07813	0	515696	4.37	0.49937	0.00022	0	0	0	0	KHV.wgs.coriell_phase3_samples.20121126.snps.affy_6.genotypes.vcf.gz	HIGH_FREE_MIX	2013-05-03 05:40:30	/nfs/1000g-archive/vol1/ftp/data/HG02525/alignment/HG02525.mapped.ILLUMINA.bwa.KHV.low_coverage.20130415.bam		HG02525.mapped.ILLUMINA.bwa.KHV.low_coverage.20130415.bam
10606	NA21121.mapped.ILLUMINA.bwa.GIH.low_coverage.20121211.bam	NA21121	0	ALL	BAM	0.07298	0.07337	1368816	8.67	0.50121	0.00011	0.5012	0.00016	8.674	1.0046	GIH.omni_wg_2141_filtered.vcf.gz	HIGH_CHIP_MIX	2013-05-17 00:54:34	/nfs/1000g-archive/vol1/ftp/data/NA21121/alignment/NA21121.mapped.ILLUMINA.bwa.GIH.low_coverage.20121211.bam		NA21121.mapped.ILLUMINA.bwa.GIH.low_coverage.20121211.bam
20639	HG02524.mapped.ILLUMINA.bwa.KHV.low_coverage.20130415.bam	HG02524	0	ALL	BAM	0.0686	0.00153	515696	4.57	0.49979	0.00032	0.50238	0.00047	4.523	1.0281	KHV.wgs.coriell_phase3_samples.20121126.snps.affy_6.genotypes.vcf.gz	HIGH_FREE_MIX	2013-05-03 05:23:17	/nfs/1000g-archive/vol1/ftp/data/HG02524/alignment/HG02524.mapped.ILLUMINA.bwa.KHV.low_coverage.20130415.bam		HG02524.mapped.ILLUMINA.bwa.KHV.low_coverage.20130415.bam
21419	HG02567.mapped.ILLUMINA.bwa.GWD.low_coverage.20130415.bam	HG02567	0	ALL	BAM	0.06406	0	1753219	8.16	0.49803	0.00202	0	0	0	0	ALL.omni_wg_2141_filtered.vcf.gz	HIGH_FREE_MIX	2013-05-03 07:23:29	/nfs/1000g-archive/vol1/ftp/data/HG02567/alignment/HG02567.mapped.ILLUMINA.bwa.GWD.low_coverage.20130415.bam		HG02567.mapped.ILLUMINA.bwa.GWD.low_coverage.20130415.bam
12854	NA21121.mapped.ILLUMINA.bwa.GIH.low_coverage.20121211.bam	NA21121	0	ALL	BAM	0.0525	0	887456	8.66	0.50372	0.00012	0	0	0	0	ALL.wgs.coriell_phase3_samples.20121126.snps.affy_6.genotypes.vcf.gz	HIGH_FREE_MIX	2013-05-16 17:01:22	/nfs/1000g-archive/vol1/ftp/data/NA21121/alignment/NA21121.mapped.ILLUMINA.bwa.GIH.low_coverage.20121211.bam		NA21121.mapped.ILLUMINA.bwa.GIH.low_coverage.20121211.bam
9793	NA20883.mapped.ILLUMINA.bwa.GIH.low_coverage.20121211.bam	NA20883	0	ALL	BAM	0.04393	0.05384	1368816	6.38	0.50121	0.00061	0.50187	0.00042	6.387	1.0009	GIH.omni_wg_2141_filtered.vcf.gz	HIGH_CHIP_MIX	2013-05-17 08:49:30	/nfs/1000g-archive/vol1/ftp/data/NA20883/alignment/NA20883.mapped.ILLUMINA.bwa.GIH.low_coverage.20121211.bam		NA20883.mapped.ILLUMINA.bwa.GIH.low_coverage.20121211.bam
55416	HG02436.mapped.ILLUMINA.bwa.ACB.low_coverage.20130415.bam	HG02436	0	ALL	BAM	0.03327	0.03373	1597764	4.51	0.50143	0.00133	0.50228	0.00178	4.515	0.9996	ACB.omni_wg_2141_filtered.vcf.gz	HIGH_CHIP_MIX	2013-05-13 23:16:55	/nfs/1000g-archive/vol1/ftp/data/HG02436/alignment/HG02436.mapped.ILLUMINA.bwa.ACB.low_coverage.20130415.bam		HG02436.mapped.ILLUMINA.bwa.ACB.low_coverage.20130415.bam
17201	HG00249.mapped.ILLUMINA.bwa.GBR.low_coverage.20130415.bam	HG00249	0	ALL	BAM	0.03285	0.03262	1389642	9.08	0.50223	0.00029	0.50257	0.0003	9.106	0.996	GBR.omni_wg_2141_filtered.vcf.gz	HIGH_CHIP_MIX	2013-04-30 20:14:42	/nfs/1000g-archive/vol1/ftp/data/HG00249/alignment/HG00249.mapped.ILLUMINA.bwa.GBR.low_coverage.20130415.bam		HG00249.mapped.ILLUMINA.bwa.GBR.low_coverage.20130415.bam
12108	HG03398.mapped.ILLUMINA.bwa.MSL.low_coverage.20121211.bam	HG03398	0	ALL	BAM	0.03142	0.03084	838168	5.99	0.50035	0.00022	0.5014	0.00025	5.993	0.9981	MSL.wgs.coriell_phase3_samples.20121126.snps.affy_6.genotypes.vcf.gz	HIGH_CHIP_MIX	2013-05-16 09:47:12	/nfs/1000g-archive/vol1/ftp/data/HG03398/alignment/HG03398.mapped.ILLUMINA.bwa.MSL.low_coverage.20121211.bam		HG03398.mapped.ILLUMINA.bwa.MSL.low_coverage.20121211.bam
10123	NA20873.mapped.ILLUMINA.bwa.GIH.low_coverage.20120522.bam	NA20873	0	ALL	BAM	0.03091	0.03086	1368816	5.88	0.50083	0.00049	0.5013	0.00034	5.882	1.0002	GIH.omni_wg_2141_filtered.vcf.gz	HIGH_CHIP_MIX	2013-05-16 19:39:37	/nfs/1000g-archive/vol1/ftp/data/NA20873/alignment/NA20873.mapped.ILLUMINA.bwa.GIH.low_coverage.20120522.bam		NA20873.mapped.ILLUMINA.bwa.GIH.low_coverage.20120522.bam
12078	NA20883.mapped.ILLUMINA.bwa.GIH.low_coverage.20121211.bam	NA20883	0	ALL	BAM	0.03015	0	887456	6.38	0.50311	0.0004	0	0	0	0	ALL.wgs.coriell_phase3_samples.20121126.snps.affy_6.genotypes.vcf.gz	HIGH_FREE_MIX	2013-05-16 11:53:55	/nfs/1000g-archive/vol1/ftp/data/NA20883/alignment/NA20883.mapped.ILLUMINA.bwa.GIH.low_coverage.20121211.bam		NA20883.mapped.ILLUMINA.bwa.GIH.low_coverage.20121211.bam
25359	HG04303.mapped.ILLUMINA.bwa.GBR.low_coverage.20130415.bam	HG04303	0	ALL	BAM	0.02966	0	591525	3.74	0.50241	0.00033	0	0	0	0	GBR.wgs.coriell_phase3_samples.20121126.snps.affy_6.genotypes.vcf.gz	PASS	2013-05-05 05:56:44	/nfs/1000g-archive/vol1/ftp/data/HG04303/alignment/HG04303.mapped.ILLUMINA.bwa.GBR.low_coverage.20130415.bam		HG04303.mapped.ILLUMINA.bwa.GBR.low_coverage.20130415.bam
13026	HG02851.mapped.ILLUMINA.bwa.GWD.low_coverage.20121211.bam	HG02851	1	ALL	BAM	0.02837	0.02975	840560	6.15	0.50109	0.00018	0.5019	5e-05	6.114	1.0274	GWD.wgs.coriell_phase3_samples.20121126.snps.affy_6.genotypes.vcf.gz	HIGH_CHIP_MIX	2013-05-16 13:14:46	/nfs/1000g-archive/vol1/ftp/data/HG02851/alignment/HG02851.mapped.ILLUMINA.bwa.GWD.low_coverage.20121211.bam		HG02851.mapped.ILLUMINA.bwa.GWD.low_coverage.20121211.bam
15213	HG00098.mapped.ILLUMINA.bwa.GBR.low_coverage.20130415.bam	HG00098	0	ALL	BAM	0.02781	0	591525	5.08	0.55411	0.04156	0	0	0	0	GBR.wgs.coriell_phase3_samples.20121126.snps.affy_6.genotypes.vcf.gz	PASS	2013-04-30 17:34:36	/nfs/1000g-archive/vol1/ftp/data/HG00098/alignment/HG00098.mapped.ILLUMINA.bwa.GBR.low_coverage.20130415.bam		HG00098.mapped.ILLUMINA.bwa.GBR.low_coverage.20130415.bam
7964	HG00740.mapped.ILLUMINA.bwa.PUR.low_coverage.20120522.bam	HG00740	1	ALL	BAM	0.02746	0.02735	1558284	4.34	0.50215	0.00047	0.502	0.00069	4.341	1.0005	PUR.omni_wg_2141_filtered.vcf.gz	HIGH_CHIP_MIX	2013-05-17 10:41:48	/nfs/1000g-archive/vol1/ftp/data/HG00740/alignment/HG00740.mapped.ILLUMINA.bwa.PUR.low_coverage.20120522.bam		HG00740.mapped.ILLUMINA.bwa.PUR.low_coverage.20120522.bam
8566	HG01597.mapped.ILLUMINA.bwa.KHV.low_coverage.20120522.bam	HG01597	1	ALL	BAM	0.027	0.02728	1241587	6.19	0.50238	0.00025	0.5024	0.00038	6.196	1.0001	KHV.omni_wg_2141_filtered.vcf.gz	HIGH_CHIP_MIX	2013-05-16 11:40:23	/nfs/1000g-archive/vol1/ftp/data/HG01597/alignment/HG01597.mapped.ILLUMINA.bwa.KHV.low_coverage.20120522.bam		HG01597.mapped.ILLUMINA.bwa.KHV.low_coverage.20120522.bam
6658	HG01668.mapped.ILLUMINA.bwa.IBS.low_coverage.20120522.bam	HG01668	1	ALL	BAM	0.02643	0.0267	1400201	4.41	0.5035	0.00104	0.50237	0.00082	4.409	1.0024	IBS.omni_wg_2141_filtered.vcf.gz	HIGH_CHIP_MIX	2013-05-16 23:00:49	/nfs/1000g-archive/vol1/ftp/data/HG01668/alignment/HG01668.mapped.ILLUMINA.bwa.IBS.low_coverage.20120522.bam		HG01668.mapped.ILLUMINA.bwa.IBS.low_coverage.20120522.bam
8283	NA20877.mapped.ILLUMINA.bwa.GIH.low_coverage.20120522.bam	NA20877	1	ALL	BAM	0.02614	0.02883	1368816	3.92	0.50087	0.00039	0.50175	0.0007	3.929	0.9997	GIH.omni_wg_2141_filtered.vcf.gz	HIGH_CHIP_MIX	2013-05-16 23:31:17	/nfs/1000g-archive/vol1/ftp/data/NA20877/alignment/NA20877.mapped.ILLUMINA.bwa.GIH.low_coverage.20120522.bam		NA20877.mapped.ILLUMINA.bwa.GIH.low_coverage.20120522.bam
54910	HG02436.mapped.ILLUMINA.bwa.ACB.low_coverage.20130415.bam	HG02436	0	ALL	BAM	0.02593	0	849391	4.54	0.50361	0.00311	0	0	0	0	ACB.wgs.coriell_phase3_samples.20121126.snps.affy_6.genotypes.vcf.gz	PASS	2013-05-13 22:10:14	/nfs/1000g-archive/vol1/ftp/data/HG02436/alignment/HG02436.mapped.ILLUMINA.bwa.ACB.low_coverage.20130415.bam		HG02436.mapped.ILLUMINA.bwa.ACB.low_coverage.20130415.bam
9544	HG02231.mapped.ILLUMINA.bwa.IBS.low_coverage.20120522.bam	HG02231	1	ALL	BAM	0.02543	0.02592	1400201	4.43	0.50179	0.00053	0.50197	0.00044	4.434	0.9988	IBS.omni_wg_2141_filtered.vcf.gz	HIGH_CHIP_MIX	2013-05-17 07:44:21	/nfs/1000g-archive/vol1/ftp/data/HG02231/alignment/HG02231.mapped.ILLUMINA.bwa.IBS.low_coverage.20120522.bam		HG02231.mapped.ILLUMINA.bwa.IBS.low_coverage.20120522.bam
13033	HG01326.mapped.ILLUMINA.bwa.PUR.low_coverage.20121211.bam	HG01326	1	ALL	BAM	0.02516	0.02455	854341	5.52	0.50041	0.00012	0.50168	0.00019	5.533	0.9966	PUR.wgs.coriell_phase3_samples.20121126.snps.affy_6.genotypes.vcf.gz	HIGH_CHIP_MIX	2013-05-16 17:37:05	/nfs/1000g-archive/vol1/ftp/data/HG01326/alignment/HG01326.mapped.ILLUMINA.bwa.PUR.low_coverage.20121211.bam		HG01326.mapped.ILLUMINA.bwa.PUR.low_coverage.20121211.bam
8633	NA20849.mapped.ILLUMINA.bwa.GIH.low_coverage.20120522.bam	NA20849	1	ALL	BAM	0.0243	0.0249	1368816	7.02	0.50208	0.00027	0.50249	0.00033	7.031	0.9993	GIH.omni_wg_2141_filtered.vcf.gz	HIGH_CHIP_MIX	2013-05-17 08:25:00	/nfs/1000g-archive/vol1/ftp/data/NA20849/alignment/NA20849.mapped.ILLUMINA.bwa.GIH.low_coverage.20120522.bam		NA20849.mapped.ILLUMINA.bwa.GIH.low_coverage.20120522.bam
25748	HG04301.mapped.ILLUMINA.bwa.GBR.low_coverage.20130415.bam	HG04301	0	ALL	BAM	0.02428	0.00121	591525	4.09	0.50353	0.00023	0.50251	0.00034	4.102	0.9983	GBR.wgs.coriell_phase3_samples.20121126.snps.affy_6.genotypes.vcf.gz	HIGH_FREE_MIX	2013-05-05 06:22:54	/nfs/1000g-archive/vol1/ftp/data/HG04301/alignment/HG04301.mapped.ILLUMINA.bwa.GBR.low_coverage.20130415.bam		HG04301.mapped.ILLUMINA.bwa.GBR.low_coverage.20130415.bam
12369	HG01326.mapped.ILLUMINA.bwa.PUR.low_coverage.20121211.bam	HG01326	1	ALL	BAM	0.02398	0	1558284	5.37	0.50238	0.00049	0	0	0	0	PUR.omni_wg_2141_filtered.vcf.gz	PASS	2013-05-17 01:01:59	/nfs/1000g-archive/vol1/ftp/data/HG01326/alignment/HG01326.mapped.ILLUMINA.bwa.PUR.low_coverage.20121211.bam		HG01326.mapped.ILLUMINA.bwa.PUR.low_coverage.20121211.bam
10332	HG00157.mapped.ILLUMINA.bwa.GBR.low_coverage.20120522.bam	HG00157	1	ALL	BAM	0.02388	0.02314	1389642	4.79	0.50278	0.00071	0.50214	0.0009	4.801	0.9992	GBR.omni_wg_2141_filtered.vcf.gz	HIGH_CHIP_MIX	2013-05-16 18:30:49	/nfs/1000g-archive/vol1/ftp/data/HG00157/alignment/HG00157.mapped.ILLUMINA.bwa.GBR.low_coverage.20120522.bam		HG00157.mapped.ILLUMINA.bwa.GBR.low_coverage.20120522.bam
9875	HG00740.mapped.ILLUMINA.bwa.PUR.low_coverage.20120522.bam	HG00740	1	ALL	BAM	0.02372	0	854341	4.48	0.50222	0.00094	0	0	0	0	PUR.wgs.coriell_phase3_samples.20121126.snps.affy_6.genotypes.vcf.gz	PASS	2013-05-16 09:34:48	/nfs/1000g-archive/vol1/ftp/data/HG00740/alignment/HG00740.mapped.ILLUMINA.bwa.PUR.low_coverage.20120522.bam		HG00740.mapped.ILLUMINA.bwa.PUR.low_coverage.20120522.bam
41936	HG03644.mapped.ILLUMINA.bwa.STU.low_coverage.20130415.bam	HG03644	1	ALL	BAM	0.02182	0.02255	779732	10.85	0.50188	0.0006	0.50199	0.00061	10.818	1.02	STU.wgs.coriell_phase3_samples.20121126.snps.affy_6.genotypes.vcf.gz	HIGH_CHIP_MIX	2013-05-10 10:37:15	/nfs/1000g-archive/vol1/ftp/data/HG03644/alignment/HG03644.mapped.ILLUMINA.bwa.STU.low_coverage.20130415.bam		HG03644.mapped.ILLUMINA.bwa.STU.low_coverage.20130415.bam
55302	HG01912.mapped.ILLUMINA.bwa.ACB.low_coverage.20130415.bam	HG01912	1	ALL	BAM	0.02172	0.0226	1597764	4.85	0.50107	0.0005	0.50167	0.0005	4.852	1.0006	ACB.omni_wg_2141_filtered.vcf.gz	HIGH_CHIP_MIX	2013-05-13 22:54:13	/nfs/1000g-archive/vol1/ftp/data/HG01912/alignment/HG01912.mapped.ILLUMINA.bwa.ACB.low_coverage.20130415.bam		HG01912.mapped.ILLUMINA.bwa.ACB.low_coverage.20130415.bam
10926	HG01668.mapped.ILLUMINA.bwa.IBS.low_coverage.20120522.bam	HG01668	1	ALL	BAM	0.02171	0	753862	4.37	0.50373	0.00232	0	0	0	0	IBS.wgs.coriell_phase3_samples.20121126.snps.affy_6.genotypes.vcf.gz	PASS	2013-05-16 10:52:15	/nfs/1000g-archive/vol1/ftp/data/HG01668/alignment/HG01668.mapped.ILLUMINA.bwa.IBS.low_coverage.20120522.bam		HG01668.mapped.ILLUMINA.bwa.IBS.low_coverage.20120522.bam
8766	HG01503.mapped.ILLUMINA.bwa.IBS.low_coverage.20120522.bam	HG01503	1	ALL	BAM	0.02086	0.02067	1400201	4.03	0.50222	0.00053	0.50245	0.00076	4.03	1.0024	IBS.omni_wg_2141_filtered.vcf.gz	HIGH_CHIP_MIX	2013-05-17 05:44:07	/nfs/1000g-archive/vol1/ftp/data/HG01503/alignment/HG01503.mapped.ILLUMINA.bwa.IBS.low_coverage.20120522.bam		HG01503.mapped.ILLUMINA.bwa.IBS.low_coverage.20120522.bam
45270	HG03644.mapped.ILLUMINA.bwa.STU.low_coverage.20130415.bam	HG03644	1	ALL	BAM	0.01958	0	1753219	10.77	0.50152	0.00034	0	0	0	0	ALL.omni_wg_2141_filtered.vcf.gz	PASS	2013-05-10 13:08:45	/nfs/1000g-archive/vol1/ftp/data/HG03644/alignment/HG03644.mapped.ILLUMINA.bwa.STU.low_coverage.20130415.bam		HG03644.mapped.ILLUMINA.bwa.STU.low_coverage.20130415.bam
50332	NA20803.mapped.ILLUMINA.bwa.TSI.low_coverage.20130415.bam	NA20803	1	ALL	BAM	0.01943	0.02014	1402149	5.64	0.50321	0.00038	0.50266	0.00033	5.646	0.9982	TSI.omni_wg_2141_filtered.vcf.gz	HIGH_CHIP_MIX	2013-05-10 23:13:04	/nfs/1000g-archive/vol1/ftp/data/NA20803/alignment/NA20803.mapped.ILLUMINA.bwa.TSI.low_coverage.20130415.bam		NA20803.mapped.ILLUMINA.bwa.TSI.low_coverage.20130415.bam
12664	NA20873.mapped.ILLUMINA.bwa.GIH.low_coverage.20120522.bam	NA20873	0	ALL	BAM	0.01939	0	887456	5.83	0.50396	0.0003	0	0	0	0	ALL.wgs.coriell_phase3_samples.20121126.snps.affy_6.genotypes.vcf.gz	PASS	2013-05-16 14:20:37	/nfs/1000g-archive/vol1/ftp/data/NA20873/alignment/NA20873.mapped.ILLUMINA.bwa.GIH.low_coverage.20120522.bam		NA20873.mapped.ILLUMINA.bwa.GIH.low_coverage.20120522.bam
7249	HG02019.mapped.ILLUMINA.bwa.KHV.low_coverage.20120522.bam	HG02019	1	ALL	BAM	0.01931	0.01951	1241587	4.33	0.50353	0.00048	0.50245	0.00069	4.333	1.0007	KHV.omni_wg_2141_filtered.vcf.gz	PASS	2013-05-17 00:13:46	/nfs/1000g-archive/vol1/ftp/data/HG02019/alignment/HG02019.mapped.ILLUMINA.bwa.KHV.low_coverage.20120522.bam		HG02019.mapped.ILLUMINA.bwa.KHV.low_coverage.20120522.bam
10551	HG02231.mapped.ILLUMINA.bwa.IBS.low_coverage.20120522.bam	HG02231	1	ALL	BAM	0.01926	0	753862	4.42	0.50409	0.00128	0	0	0	0	IBS.wgs.coriell_phase3_samples.20121126.snps.affy_6.genotypes.vcf.gz	PASS	2013-05-16 07:18:07	/nfs/1000g-archive/vol1/ftp/data/HG02231/alignment/HG02231.mapped.ILLUMINA.bwa.IBS.low_coverage.20120522.bam		HG02231.mapped.ILLUMINA.bwa.IBS.low_coverage.20120522.bam
10565	HG02165.mapped.ILLUMINA.bwa.CDX.low_coverage.20120522.bam	HG02165	1	ALL	BAM	0.01888	0.01935	1235978	4.44	0.50307	0.00047	0.50255	0.00064	4.442	1.002	CDX.omni_wg_2141_filtered.vcf.gz	PASS	2013-05-17 01:38:37	/nfs/1000g-archive/vol1/ftp/data/HG02165/alignment/HG02165.mapped.ILLUMINA.bwa.CDX.low_coverage.20120522.bam		HG02165.mapped.ILLUMINA.bwa.CDX.low_coverage.20120522.bam
12016	HG03398.mapped.ILLUMINA.bwa.MSL.low_coverage.20121211.bam	HG03398	0	ALL	BAM	0.0184	0	1753219	5.84	0.49742	0.00138	0	0	0	0	ALL.omni_wg_2141_filtered.vcf.gz	PASS	2013-05-16 11:22:09	/nfs/1000g-archive/vol1/ftp/data/HG03398/alignment/HG03398.mapped.ILLUMINA.bwa.MSL.low_coverage.20121211.bam		HG03398.mapped.ILLUMINA.bwa.MSL.low_coverage.20121211.bam
9424	NA20846.mapped.ILLUMINA.bwa.GIH.low_coverage.20120522.bam	NA20846	1	ALL	BAM	0.01839	0.02023	1368816	4.82	0.50512	0.00076	0.50231	0.00054	4.832	0.999	GIH.omni_wg_2141_filtered.vcf.gz	HIGH_CHIP_MIX	2013-05-17 09:29:50	/nfs/1000g-archive/vol1/ftp/data/NA20846/alignment/NA20846.mapped.ILLUMINA.bwa.GIH.low_coverage.20120522.bam		NA20846.mapped.ILLUMINA.bwa.GIH.low_coverage.20120522.bam
34780	NA20508.mapped.ILLUMINA.bwa.TSI.low_coverage.20130415.bam	NA20508	1	ALL	BAM	0.01839	0.01839	1402149	6.38	0.50195	0.00044	0.50278	0.00039	6.385	0.9998	TSI.omni_wg_2141_filtered.vcf.gz	PASS	2013-05-08 06:14:48	/nfs/1000g-archive/vol1/ftp/data/NA20508/alignment/NA20508.mapped.ILLUMINA.bwa.TSI.low_coverage.20130415.bam		NA20508.mapped.ILLUMINA.bwa.TSI.low_coverage.20130415.bam
8358	HG01489.mapped.ILLUMINA.bwa.CLM.low_coverage.20120522.bam	HG01489	1	ALL	BAM	0.01838	0.01944	1493063	5.14	0.50327	0.00035	0.50166	0.00045	5.15	0.9975	CLM.omni_wg_2141_filtered.vcf.gz	PASS	2013-05-16 22:55:48	/nfs/1000g-archive/vol1/ftp/data/HG01489/alignment/HG01489.mapped.ILLUMINA.bwa.CLM.low_coverage.20120522.bam		HG01489.mapped.ILLUMINA.bwa.CLM.low_coverage.20120522.bam
9927	HG01170.mapped.ILLUMINA.bwa.PUR.low_coverage.20120522.bam	HG01170	1	ALL	BAM	0.01838	0.01825	1558284	4.91	0.5019	0.00043	0.50138	0.00071	4.919	0.9992	PUR.omni_wg_2141_filtered.vcf.gz	PASS	2013-05-16 23:53:14	/nfs/1000g-archive/vol1/ftp/data/HG01170/alignment/HG01170.mapped.ILLUMINA.bwa.PUR.low_coverage.20120522.bam		HG01170.mapped.ILLUMINA.bwa.PUR.low_coverage.20120522.bam
27696	NA07357.mapped.ILLUMINA.bwa.CEU.low_coverage.20130415.bam	NA07357	1	ALL	BAM	0.01832	0.01792	1400785	6.09	0.50196	0.00046	0.50244	0.00058	6.098	0.9983	CEU.omni_wg_2141_filtered.vcf.gz	PASS	2013-05-05 10:52:44	/nfs/1000g-archive/vol1/ftp/data/NA07357/alignment/NA07357.mapped.ILLUMINA.bwa.CEU.low_coverage.20130415.bam		NA07357.mapped.ILLUMINA.bwa.CEU.low_coverage.20130415.bam
8965	HG00245.mapped.ILLUMINA.bwa.GBR.low_coverage.20120522.bam	HG00245	1	ALL	BAM	0.01828	0.01791	1389642	4.37	0.50133	0.00065	0.50209	0.00074	4.374	0.9984	GBR.omni_wg_2141_filtered.vcf.gz	PASS	2013-05-16 13:54:58	/nfs/1000g-archive/vol1/ftp/data/HG00245/alignment/HG00245.mapped.ILLUMINA.bwa.GBR.low_coverage.20120522.bam		HG00245.mapped.ILLUMINA.bwa.GBR.low_coverage.20120522.bam
12861	HG03061.mapped.ILLUMINA.bwa.MSL.low_coverage.20121211.bam	HG03061	1	ALL	BAM	0.01818	0.01812	838168	3.94	0.50137	0.0003	0.50037	0.00028	3.941	1.0002	MSL.wgs.coriell_phase3_samples.20121126.snps.affy_6.genotypes.vcf.gz	PASS	2013-05-16 06:38:26	/nfs/1000g-archive/vol1/ftp/data/HG03061/alignment/HG03061.mapped.ILLUMINA.bwa.MSL.low_coverage.20121211.bam		HG03061.mapped.ILLUMINA.bwa.MSL.low_coverage.20121211.bam
16836	HG00249.mapped.ILLUMINA.bwa.GBR.low_coverage.20130415.bam	HG00249	0	ALL	BAM	0.01758	0	591525	9.32	0.5123	0.00599	0	0	0	0	GBR.wgs.coriell_phase3_samples.20121126.snps.affy_6.genotypes.vcf.gz	PASS	2013-04-30 19:33:04	/nfs/1000g-archive/vol1/ftp/data/HG00249/alignment/HG00249.mapped.ILLUMINA.bwa.GBR.low_coverage.20130415.bam		HG00249.mapped.ILLUMINA.bwa.GBR.low_coverage.20130415.bam
9346	HG02185.mapped.ILLUMINA.bwa.CDX.low_coverage.20120522.bam	HG02185	1	ALL	BAM	0.01749	0.01864	1235978	5.16	0.50277	0.00044	0.50226	0.00046	5.17	1.002	CDX.omni_wg_2141_filtered.vcf.gz	PASS	2013-05-16 20:42:24	/nfs/1000g-archive/vol1/ftp/data/HG02185/alignment/HG02185.mapped.ILLUMINA.bwa.CDX.low_coverage.20120522.bam		HG02185.mapped.ILLUMINA.bwa.CDX.low_coverage.20120522.bam
34426	NA20531.mapped.ILLUMINA.bwa.TSI.low_coverage.20130415.bam	NA20531	1	ALL	BAM	0.01742	0.01701	1402149	6.47	0.50135	0.0005	0.50111	0.0005	6.482	0.998	TSI.omni_wg_2141_filtered.vcf.gz	PASS	2013-05-08 05:13:05	/nfs/1000g-archive/vol1/ftp/data/NA20531/alignment/NA20531.mapped.ILLUMINA.bwa.TSI.low_coverage.20130415.bam		NA20531.mapped.ILLUMINA.bwa.TSI.low_coverage.20130415.bam
10667	NA20859.mapped.ILLUMINA.bwa.GIH.low_coverage.20120522.bam	NA20859	1	ALL	BAM	0.0174	0.01808	1368816	7.15	0.50115	0.0003	0.50259	0.00034	7.161	1.0003	GIH.omni_wg_2141_filtered.vcf.gz	PASS	2013-05-17 11:35:05	/nfs/1000g-archive/vol1/ftp/data/NA20859/alignment/NA20859.mapped.ILLUMINA.bwa.GIH.low_coverage.20120522.bam		NA20859.mapped.ILLUMINA.bwa.GIH.low_coverage.20120522.bam
12181	HG02851.mapped.ILLUMINA.bwa.GWD.low_coverage.20121211.bam	HG02851	1	ALL	BAM	0.0174	0	1753219	6.15	0.4981	0.0013	0	0	0	0	ALL.omni_wg_2141_filtered.vcf.gz	PASS	2013-05-16 22:23:37	/nfs/1000g-archive/vol1/ftp/data/HG02851/alignment/HG02851.mapped.ILLUMINA.bwa.GWD.low_coverage.20121211.bam		HG02851.mapped.ILLUMINA.bwa.GWD.low_coverage.20121211.bam
7831	NA20869.mapped.ILLUMINA.bwa.GIH.low_coverage.20120522.bam	NA20869	1	ALL	BAM	0.01664	0.01684	1368816	5.22	0.5026	0.0004	0.50287	0.00059	5.224	1.0002	GIH.omni_wg_2141_filtered.vcf.gz	PASS	2013-05-16 11:40:38	/nfs/1000g-archive/vol1/ftp/data/NA20869/alignment/NA20869.mapped.ILLUMINA.bwa.GIH.low_coverage.20120522.bam		NA20869.mapped.ILLUMINA.bwa.GIH.low_coverage.20120522.bam
12516	HG03246.mapped.ILLUMINA.bwa.GWD.low_coverage.20121211.bam	HG03246	1	ALL	BAM	0.01661	0.01846	840560	6.28	0.49985	0.00011	0.50065	0.00012	6.254	1.0256	GWD.wgs.coriell_phase3_samples.20121126.snps.affy_6.genotypes.vcf.gz	PASS	2013-05-16 18:24:03	/nfs/1000g-archive/vol1/ftp/data/HG03246/alignment/HG03246.mapped.ILLUMINA.bwa.GWD.low_coverage.20121211.bam		HG03246.mapped.ILLUMINA.bwa.GWD.low_coverage.20121211.bam
8967	HG01489.mapped.ILLUMINA.bwa.CLM.low_coverage.20120522.bam	HG01489	1	ALL	BAM	0.01634	0	832763	5.4	0.50221	0.00045	0	0	0	0	CLM.wgs.coriell_phase3_samples.20121126.snps.affy_6.genotypes.vcf.gz	PASS	2013-05-16 13:32:00	/nfs/1000g-archive/vol1/ftp/data/HG01489/alignment/HG01489.mapped.ILLUMINA.bwa.CLM.low_coverage.20120522.bam		HG01489.mapped.ILLUMINA.bwa.CLM.low_coverage.20120522.bam
54914	HG01912.mapped.ILLUMINA.bwa.ACB.low_coverage.20130415.bam	HG01912	1	ALL	BAM	0.01609	0	849391	4.88	0.50273	0.00181	0	0	0	0	ACB.wgs.coriell_phase3_samples.20121126.snps.affy_6.genotypes.vcf.gz	PASS	2013-05-13 22:11:13	/nfs/1000g-archive/vol1/ftp/data/HG01912/alignment/HG01912.mapped.ILLUMINA.bwa.ACB.low_coverage.20130415.bam		HG01912.mapped.ILLUMINA.bwa.ACB.low_coverage.20130415.bam
12340	NA20849.mapped.ILLUMINA.bwa.GIH.low_coverage.20120522.bam	NA20849	1	ALL	BAM	0.01579	0	887456	7.14	0.5025	0.00046	0	0	0	0	ALL.wgs.coriell_phase3_samples.20121126.snps.affy_6.genotypes.vcf.gz	PASS	2013-05-16 10:52:44	/nfs/1000g-archive/vol1/ftp/data/NA20849/alignment/NA20849.mapped.ILLUMINA.bwa.GIH.low_coverage.20120522.bam		NA20849.mapped.ILLUMINA.bwa.GIH.low_coverage.20120522.bam
9014	HG01503.mapped.ILLUMINA.bwa.IBS.low_coverage.20120522.bam	HG01503	1	ALL	BAM	0.01564	0	753862	3.92	0.50391	0.00175	0	0	0	0	IBS.wgs.coriell_phase3_samples.20121126.snps.affy_6.genotypes.vcf.gz	PASS	2013-05-16 09:18:38	/nfs/1000g-archive/vol1/ftp/data/HG01503/alignment/HG01503.mapped.ILLUMINA.bwa.IBS.low_coverage.20120522.bam		HG01503.mapped.ILLUMINA.bwa.IBS.low_coverage.20120522.bam
16988	HG02180.mapped.ILLUMINA.bwa.CDX.low_coverage.20130415.bam	HG02180	1	ALL	BAM	0.01543	0.01506	1235978	4.33	0.50388	0.00034	0.50338	0.00049	4.336	0.998	CDX.omni_wg_2141_filtered.vcf.gz	PASS	2013-04-30 19:50:04	/nfs/1000g-archive/vol1/ftp/data/HG02180/alignment/HG02180.mapped.ILLUMINA.bwa.CDX.low_coverage.20130415.bam		HG02180.mapped.ILLUMINA.bwa.CDX.low_coverage.20130415.bam
10004	HG01789.mapped.ILLUMINA.bwa.GBR.low_coverage.20120522.bam	HG01789	1	ALL	BAM	0.0154	0.01555	1389642	4.98	0.50293	0.00057	0.50328	0.0006	4.982	1.0051	GBR.omni_wg_2141_filtered.vcf.gz	PASS	2013-05-17 00:55:14	/nfs/1000g-archive/vol1/ftp/data/HG01789/alignment/HG01789.mapped.ILLUMINA.bwa.GBR.low_coverage.20120522.bam		HG01789.mapped.ILLUMINA.bwa.GBR.low_coverage.20120522.bam
8435	HG01170.mapped.ILLUMINA.bwa.PUR.low_coverage.20120522.bam	HG01170	1	ALL	BAM	0.01524	0	854341	5.06	0.50111	0.00071	0	0	0	0	PUR.wgs.coriell_phase3_samples.20121126.snps.affy_6.genotypes.vcf.gz	PASS	2013-05-16 10:56:09	/nfs/1000g-archive/vol1/ftp/data/HG01170/alignment/HG01170.mapped.ILLUMINA.bwa.PUR.low_coverage.20120522.bam		HG01170.mapped.ILLUMINA.bwa.PUR.low_coverage.20120522.bam
21025	HG03063.mapped.ILLUMINA.bwa.MSL.low_coverage.20130415.bam	HG03063	1	ALL	BAM	0.01467	0.01574	838168	7.94	0.5014	9e-05	0.50087	7e-05	7.911	1.0248	MSL.wgs.coriell_phase3_samples.20121126.snps.affy_6.genotypes.vcf.gz	PASS	2013-05-03 05:53:54	/nfs/1000g-archive/vol1/ftp/data/HG03063/alignment/HG03063.mapped.ILLUMINA.bwa.MSL.low_coverage.20130415.bam		HG03063.mapped.ILLUMINA.bwa.MSL.low_coverage.20130415.bam
28673	NA12776.mapped.ILLUMINA.bwa.CEU.low_coverage.20130415.bam	NA12776	1	ALL	BAM	0.01463	0.01368	1400785	5.54	0.50171	0.00053	0.50212	0.00064	5.541	0.9993	CEU.omni_wg_2141_filtered.vcf.gz	PASS	2013-05-05 11:59:25	/nfs/1000g-archive/vol1/ftp/data/NA12776/alignment/NA12776.mapped.ILLUMINA.bwa.CEU.low_coverage.20130415.bam		NA12776.mapped.ILLUMINA.bwa.CEU.low_coverage.20130415.bam
49838	NA18944.mapped.ILLUMINA.bwa.JPT.low_coverage.20130415.bam	NA18944	1	ALL	BAM	0.01459	0.01494	1243522	5.48	0.50329	0.00199	0.5023	0.00205	5.488	0.9991	JPT.omni_wg_2141_filtered.vcf.gz	PASS	2013-05-10 22:10:26	/nfs/1000g-archive/vol1/ftp/data/NA18944/alignment/NA18944.mapped.ILLUMINA.bwa.JPT.low_coverage.20130415.bam		NA18944.mapped.ILLUMINA.bwa.JPT.low_coverage.20130415.bam
8443	NA20853.mapped.ILLUMINA.bwa.GIH.low_coverage.20120522.bam	NA20853	1	ALL	BAM	0.01428	0.0143	1368816	5.85	0.50184	0.00041	0.50253	0.0004	5.863	0.9978	GIH.omni_wg_2141_filtered.vcf.gz	PASS	2013-05-17 08:55:54	/nfs/1000g-archive/vol1/ftp/data/NA20853/alignment/NA20853.mapped.ILLUMINA.bwa.GIH.low_coverage.20120522.bam		NA20853.mapped.ILLUMINA.bwa.GIH.low_coverage.20120522.bam
7769	HG00262.mapped.ILLUMINA.bwa.GBR.low_coverage.20120522.bam	HG00262	1	ALL	BAM	0.01421	0.01369	1389642	5.33	0.50171	0.00053	0.502	0.00058	5.339	0.9984	GBR.omni_wg_2141_filtered.vcf.gz	PASS	2013-05-17 01:22:42	/nfs/1000g-archive/vol1/ftp/data/HG00262/alignment/HG00262.mapped.ILLUMINA.bwa.GBR.low_coverage.20120522.bam		HG00262.mapped.ILLUMINA.bwa.GBR.low_coverage.20120522.bam
8555	HG02165.mapped.ILLUMINA.bwa.CDX.low_coverage.20120522.bam	HG02165	1	ALL	BAM	0.01412	0	665690	4.46	0.50426	0.00219	0	0	0	0	CDX.wgs.coriell_phase3_samples.20121126.snps.affy_6.genotypes.vcf.gz	PASS	2013-05-16 06:50:34	/nfs/1000g-archive/vol1/ftp/data/HG02165/alignment/HG02165.mapped.ILLUMINA.bwa.CDX.low_coverage.20120522.bam		HG02165.mapped.ILLUMINA.bwa.CDX.low_coverage.20120522.bam
31866	NA19797.mapped.ILLUMINA.bwa.MXL.low_coverage.20130415.bam	NA19797	0	ALL	BAM	0.01381	0.00114	671518	3.75	0.49979	0.00021	0.50007	0.00042	3.75	0.9985	MXL.wgs.coriell_phase3_samples.20121126.snps.affy_6.genotypes.vcf.gz	PASS	2013-05-08 01:28:31	/nfs/1000g-archive/vol1/ftp/data/NA19797/alignment/NA19797.mapped.ILLUMINA.bwa.MXL.low_coverage.20130415.bam		NA19797.mapped.ILLUMINA.bwa.MXL.low_coverage.20130415.bam
9595	HG00367.mapped.ILLUMINA.bwa.FIN.low_coverage.20120522.bam	HG00367	1	ALL	BAM	0.01363	0.0134	1385013	3.47	0.50195	0.00061	0.50313	0.00059	3.466	1.001	FIN.omni_wg_2141_filtered.vcf.gz	PASS	2013-05-17 09:42:32	/nfs/1000g-archive/vol1/ftp/data/HG00367/alignment/HG00367.mapped.ILLUMINA.bwa.FIN.low_coverage.20120522.bam		HG00367.mapped.ILLUMINA.bwa.FIN.low_coverage.20120522.bam
7155	NA18990.mapped.ILLUMINA.bwa.JPT.low_coverage.20120522.bam	NA18990	1	ALL	BAM	0.01343	0.01464	1243522	5.39	0.50383	0.00046	0.50325	0.00052	5.4	0.9993	JPT.omni_wg_2141_filtered.vcf.gz	PASS	2013-05-17 08:03:22	/nfs/1000g-archive/vol1/ftp/data/NA18990/alignment/NA18990.mapped.ILLUMINA.bwa.JPT.low_coverage.20120522.bam		NA18990.mapped.ILLUMINA.bwa.JPT.low_coverage.20120522.bam
9845	HG02185.mapped.ILLUMINA.bwa.CDX.low_coverage.20120522.bam	HG02185	1	ALL	BAM	0.01335	0	665690	5.19	0.50424	0.00159	0	0	0	0	CDX.wgs.coriell_phase3_samples.20121126.snps.affy_6.genotypes.vcf.gz	PASS	2013-05-16 06:23:48	/nfs/1000g-archive/vol1/ftp/data/HG02185/alignment/HG02185.mapped.ILLUMINA.bwa.CDX.low_coverage.20120522.bam		HG02185.mapped.ILLUMINA.bwa.CDX.low_coverage.20120522.bam
10594	HG00264.mapped.ILLUMINA.bwa.GBR.low_coverage.20120522.bam	HG00264	1	ALL	BAM	0.01325	0.01365	1389642	4.81	0.50265	0.00063	0.50162	0.00062	4.823	0.9968	GBR.omni_wg_2141_filtered.vcf.gz	PASS	2013-05-16 22:44:59	/nfs/1000g-archive/vol1/ftp/data/HG00264/alignment/HG00264.mapped.ILLUMINA.bwa.GBR.low_coverage.20120522.bam		HG00264.mapped.ILLUMINA.bwa.GBR.low_coverage.20120522.bam
8050	NA19012.mapped.ILLUMINA.bwa.JPT.low_coverage.20120522.bam	NA19012	1	ALL	BAM	0.01317	0.01896	1243522	5.52	0.50546	0.00078	0.507	0.00087	5.558	0.9904	JPT.omni_wg_2141_filtered.vcf.gz	PASS	2013-05-16 21:09:45	/nfs/1000g-archive/vol1/ftp/data/NA19012/alignment/NA19012.mapped.ILLUMINA.bwa.JPT.low_coverage.20120522.bam		NA19012.mapped.ILLUMINA.bwa.JPT.low_coverage.20120522.bam
8798	HG00120.mapped.ILLUMINA.bwa.GBR.low_coverage.20120522.bam	HG00120	1	ALL	BAM	0.01266	0.01316	1389642	4.64	0.50185	0.00076	0.50219	0.00054	4.65	0.9971	GBR.omni_wg_2141_filtered.vcf.gz	PASS	2013-05-17 08:23:25	/nfs/1000g-archive/vol1/ftp/data/HG00120/alignment/HG00120.mapped.ILLUMINA.bwa.GBR.low_coverage.20120522.bam		HG00120.mapped.ILLUMINA.bwa.GBR.low_coverage.20120522.bam
35031	NA18942.mapped.ILLUMINA.bwa.JPT.low_coverage.20130415.bam	NA18942	1	ALL	BAM	0.01265	0.01245	1243522	6.97	0.5019	0.00158	0.5019	0.00174	6.987	0.9982	JPT.omni_wg_2141_filtered.vcf.gz	PASS	2013-05-08 06:52:31	/nfs/1000g-archive/vol1/ftp/data/NA18942/alignment/NA18942.mapped.ILLUMINA.bwa.JPT.low_coverage.20130415.bam		NA18942.mapped.ILLUMINA.bwa.JPT.low_coverage.20130415.bam
8292	HG01049.mapped.ILLUMINA.bwa.PUR.low_coverage.20120522.bam	HG01049	1	ALL	BAM	0.01258	0.01193	1558284	6.6	0.5014	0.00045	0.50307	0.00037	6.635	0.993	PUR.omni_wg_2141_filtered.vcf.gz	PASS	2013-05-16 11:52:41	/nfs/1000g-archive/vol1/ftp/data/HG01049/alignment/HG01049.mapped.ILLUMINA.bwa.PUR.low_coverage.20120522.bam		HG01049.mapped.ILLUMINA.bwa.PUR.low_coverage.20120522.bam
10307	NA19703.mapped.ILLUMINA.bwa.ASW.low_coverage.20120522.bam	NA19703	1	ALL	BAM	0.01246	0.01303	1675632	6.23	0.50293	0.00025	0.50301	0.00032	6.264	0.9918	ASW.omni_wg_2141_filtered.vcf.gz	PASS	2013-05-17 07:19:36	/nfs/1000g-archive/vol1/ftp/data/NA19703/alignment/NA19703.mapped.ILLUMINA.bwa.ASW.low_coverage.20120522.bam		NA19703.mapped.ILLUMINA.bwa.ASW.low_coverage.20120522.bam
9147	HG01176.mapped.ILLUMINA.bwa.PUR.low_coverage.20120522.bam	HG01176	1	ALL	BAM	0.01246	0.01238	1558284	14.31	0.50145	0.00018	0.50203	0.00028	14.348	0.9955	PUR.omni_wg_2141_filtered.vcf.gz	PASS	2013-05-17 07:19:44	/nfs/1000g-archive/vol1/ftp/data/HG01176/alignment/HG01176.mapped.ILLUMINA.bwa.PUR.low_coverage.20120522.bam		HG01176.mapped.ILLUMINA.bwa.PUR.low_coverage.20120522.bam
12781	HG03594.mapped.ILLUMINA.bwa.BEB.low_coverage.20121211.bam	HG03594	1	ALL	BAM	0.01241	0.01306	783628	6.49	0.49957	0.00023	0.50113	8e-05	6.472	1.0228	BEB.wgs.coriell_phase3_samples.20121126.snps.affy_6.genotypes.vcf.gz	PASS	2013-05-16 10:19:39	/nfs/1000g-archive/vol1/ftp/data/HG03594/alignment/HG03594.mapped.ILLUMINA.bwa.BEB.low_coverage.20121211.bam		HG03594.mapped.ILLUMINA.bwa.BEB.low_coverage.20121211.bam
25701	HG03917.mapped.ILLUMINA.bwa.BEB.low_coverage.20130415.bam	HG03917	1	ALL	BAM	0.01219	0.01272	783628	6.64	0.50061	0.00013	0.50089	0.00014	6.614	1.023	BEB.wgs.coriell_phase3_samples.20121126.snps.affy_6.genotypes.vcf.gz	PASS	2013-05-05 06:17:48	/nfs/1000g-archive/vol1/ftp/data/HG03917/alignment/HG03917.mapped.ILLUMINA.bwa.BEB.low_coverage.20130415.bam		HG03917.mapped.ILLUMINA.bwa.BEB.low_coverage.20130415.bam
41593	NA20759.mapped.ILLUMINA.bwa.TSI.low_coverage.20130422.bam	NA20759	1	ALL	BAM	0.01208	0.01131	1402149	7.75	0.50082	0.00072	0.50198	0.00084	7.765	0.9988	TSI.omni_wg_2141_filtered.vcf.gz	PASS	2013-05-14 01:12:00	/nfs/1000g-archive/vol1/ftp/data/NA20759/alignment/NA20759.mapped.ILLUMINA.bwa.TSI.low_coverage.20130422.bam		NA20759.mapped.ILLUMINA.bwa.TSI.low_coverage.20130422.bam
12506	HG02790.mapped.ILLUMINA.bwa.PJL.low_coverage.20121211.bam	HG02790	1	ALL	BAM	0.012	0.01179	781539	9.02	0.50114	0.00108	0.50064	0.00101	9.043	0.9975	PJL.wgs.coriell_phase3_samples.20121126.snps.affy_6.genotypes.vcf.gz	PASS	2013-05-16 19:37:09	/nfs/1000g-archive/vol1/ftp/data/HG02790/alignment/HG02790.mapped.ILLUMINA.bwa.PJL.low_coverage.20121211.bam		HG02790.mapped.ILLUMINA.bwa.PJL.low_coverage.20121211.bam
12079	NA20859.mapped.ILLUMINA.bwa.GIH.low_coverage.20120522.bam	NA20859	1	ALL	BAM	0.01183	0	887456	7.3	0.50194	0.00016	0	0	0	0	ALL.wgs.coriell_phase3_samples.20121126.snps.affy_6.genotypes.vcf.gz	PASS	2013-05-16 14:06:02	/nfs/1000g-archive/vol1/ftp/data/NA20859/alignment/NA20859.mapped.ILLUMINA.bwa.GIH.low_coverage.20120522.bam		NA20859.mapped.ILLUMINA.bwa.GIH.low_coverage.20120522.bam
12597	HG02790.mapped.ILLUMINA.bwa.PJL.low_coverage.20121211.bam	HG02790	1	ALL	BAM	0.01182	0	1753219	8.75	0.50095	0.00044	0	0	0	0	ALL.omni_wg_2141_filtered.vcf.gz	PASS	2013-05-17 09:31:43	/nfs/1000g-archive/vol1/ftp/data/HG02790/alignment/HG02790.mapped.ILLUMINA.bwa.PJL.low_coverage.20121211.bam		HG02790.mapped.ILLUMINA.bwa.PJL.low_coverage.20121211.bam
13053	NA20877.mapped.ILLUMINA.bwa.GIH.low_coverage.20120522.bam	NA20877	1	ALL	BAM	0.0117	0	887456	3.99	0.50514	0.00082	0	0	0	0	ALL.wgs.coriell_phase3_samples.20121126.snps.affy_6.genotypes.vcf.gz	PASS	2013-05-16 14:45:35	/nfs/1000g-archive/vol1/ftp/data/NA20877/alignment/NA20877.mapped.ILLUMINA.bwa.GIH.low_coverage.20120522.bam		NA20877.mapped.ILLUMINA.bwa.GIH.low_coverage.20120522.bam
49936	NA12348.mapped.ILLUMINA.bwa.CEU.low_coverage.20130415.bam	NA12348	1	ALL	BAM	0.01164	0.01129	1400785	7.86	0.50167	0.00045	0.50202	0.00051	7.87	0.9994	CEU.omni_wg_2141_filtered.vcf.gz	PASS	2013-05-10 22:31:57	/nfs/1000g-archive/vol1/ftp/data/NA12348/alignment/NA12348.mapped.ILLUMINA.bwa.CEU.low_coverage.20130415.bam		NA12348.mapped.ILLUMINA.bwa.CEU.low_coverage.20130415.bam
9415	NA20861.mapped.ILLUMINA.bwa.GIH.low_coverage.20120522.bam	NA20861	1	ALL	BAM	0.01144	0.01256	1368816	4.69	0.5024	0.00032	0.5025	0.00045	4.701	0.9968	GIH.omni_wg_2141_filtered.vcf.gz	PASS	2013-05-17 11:22:02	/nfs/1000g-archive/vol1/ftp/data/NA20861/alignment/NA20861.mapped.ILLUMINA.bwa.GIH.low_coverage.20120522.bam		NA20861.mapped.ILLUMINA.bwa.GIH.low_coverage.20120522.bam
34729	NA20528.mapped.ILLUMINA.bwa.TSI.low_coverage.20130415.bam	NA20528	1	ALL	BAM	0.01141	0.01089	1402149	6.7	0.50136	0.00036	0.50209	0.00045	6.706	1.0004	TSI.omni_wg_2141_filtered.vcf.gz	PASS	2013-05-08 06:12:40	/nfs/1000g-archive/vol1/ftp/data/NA20528/alignment/NA20528.mapped.ILLUMINA.bwa.TSI.low_coverage.20130415.bam		NA20528.mapped.ILLUMINA.bwa.TSI.low_coverage.20130415.bam
9537	HG01075.mapped.ILLUMINA.bwa.PUR.low_coverage.20120522.bam	HG01075	1	ALL	BAM	0.01134	0.01141	1558284	15.04	0.5011	0.00026	0.50187	0.00037	15.061	0.998	PUR.omni_wg_2141_filtered.vcf.gz	PASS	2013-05-17 08:06:11	/nfs/1000g-archive/vol1/ftp/data/HG01075/alignment/HG01075.mapped.ILLUMINA.bwa.PUR.low_coverage.20120522.bam		HG01075.mapped.ILLUMINA.bwa.PUR.low_coverage.20120522.bam
16982	HG02179.mapped.ILLUMINA.bwa.CDX.low_coverage.20130415.bam	HG02179	1	ALL	BAM	0.01128	0.01088	1235978	4.17	0.50457	0.00077	0.50333	0.00072	4.175	0.9979	CDX.omni_wg_2141_filtered.vcf.gz	PASS	2013-04-30 19:48:12	/nfs/1000g-archive/vol1/ftp/data/HG02179/alignment/HG02179.mapped.ILLUMINA.bwa.CDX.low_coverage.20130415.bam		HG02179.mapped.ILLUMINA.bwa.CDX.low_coverage.20130415.bam
10707	NA12342.mapped.ILLUMINA.bwa.CEU.low_coverage.20120522.bam	NA12342	1	ALL	BAM	0.0112	0.01127	1400785	14.63	0.50021	0.00047	0.50092	0.00047	14.657	0.9964	CEU.omni_wg_2141_filtered.vcf.gz	PASS	2013-05-17 04:48:16	/nfs/1000g-archive/vol1/ftp/data/NA12342/alignment/NA12342.mapped.ILLUMINA.bwa.CEU.low_coverage.20120522.bam		NA12342.mapped.ILLUMINA.bwa.CEU.low_coverage.20120522.bam
62959	HG00270.mapped.ILLUMINA.bwa.FIN.low_coverage.20130415.bam	HG00270	0	ALL	BAM	0.01117	0.01128	1385013	12.02	0.50088	0.00029	0.50174	0.00034	12.036	0.9995	FIN.omni_wg_2141_filtered.vcf.gz	PASS	2013-05-14 06:51:21	/nfs/1000g-archive/vol1/ftp/data/HG00270/alignment/HG00270.mapped.ILLUMINA.bwa.FIN.low_coverage.20130415.bam		HG00270.mapped.ILLUMINA.bwa.FIN.low_coverage.20130415.bam
9558	HG01176.mapped.ILLUMINA.bwa.PUR.low_coverage.20120522.bam	HG01176	1	ALL	BAM	0.01117	0	854341	14.49	0.50097	0.00029	0	0	0	0	PUR.wgs.coriell_phase3_samples.20121126.snps.affy_6.genotypes.vcf.gz	PASS	2013-05-16 12:46:35	/nfs/1000g-archive/vol1/ftp/data/HG01176/alignment/HG01176.mapped.ILLUMINA.bwa.PUR.low_coverage.20120522.bam		HG01176.mapped.ILLUMINA.bwa.PUR.low_coverage.20120522.bam
9512	HG00258.mapped.ILLUMINA.bwa.GBR.low_coverage.20120522.bam	HG00258	1	ALL	BAM	0.01112	0.01097	1389642	8.64	0.50064	0.00033	0.50138	0.00041	8.646	0.9991	GBR.omni_wg_2141_filtered.vcf.gz	PASS	2013-05-16 23:11:00	/nfs/1000g-archive/vol1/ftp/data/HG00258/alignment/HG00258.mapped.ILLUMINA.bwa.GBR.low_coverage.20120522.bam		HG00258.mapped.ILLUMINA.bwa.GBR.low_coverage.20120522.bam
47201	HG03108.mapped.ILLUMINA.bwa.ESN.low_coverage.20130422.bam	HG03108	1	ALL	BAM	0.01106	0.011	835395	9.62	0.50147	0.00093	0.50194	0.00104	9.652	0.9966	ESN.wgs.coriell_phase3_samples.20121126.snps.affy_6.genotypes.vcf.gz	PASS	2013-05-10 14:36:23	/nfs/1000g-archive/vol1/ftp/data/HG03108/alignment/HG03108.mapped.ILLUMINA.bwa.ESN.low_coverage.20130422.bam		HG03108.mapped.ILLUMINA.bwa.ESN.low_coverage.20130422.bam
12908	HG00598.mapped.ILLUMINA.bwa.CHS.low_coverage.20121211.bam	HG00598	1	ALL	BAM	0.01094	0.01083	662328	9.11	0.50114	0.00085	0.50197	0.00087	9.09	1.0206	CHS.wgs.coriell_phase3_samples.20121126.snps.affy_6.genotypes.vcf.gz	PASS	2013-05-16 13:59:08	/nfs/1000g-archive/vol1/ftp/data/HG00598/alignment/HG00598.mapped.ILLUMINA.bwa.CHS.low_coverage.20121211.bam		HG00598.mapped.ILLUMINA.bwa.CHS.low_coverage.20121211.bam
10931	HG01049.mapped.ILLUMINA.bwa.PUR.low_coverage.20120522.bam	HG01049	1	ALL	BAM	0.0109	0	854341	7.03	0.50188	0.00039	0	0	0	0	PUR.wgs.coriell_phase3_samples.20121126.snps.affy_6.genotypes.vcf.gz	PASS	2013-05-16 13:29:06	/nfs/1000g-archive/vol1/ftp/data/HG01049/alignment/HG01049.mapped.ILLUMINA.bwa.PUR.low_coverage.20120522.bam		HG01049.mapped.ILLUMINA.bwa.PUR.low_coverage.20120522.bam
9265	NA12044.mapped.ILLUMINA.bwa.CEU.low_coverage.20121211.bam	NA12044	1	ALL	BAM	0.01073	0.0108	1400785	12.29	0.50127	0.00035	0.50201	0.0004	12.309	0.9985	CEU.omni_wg_2141_filtered.vcf.gz	PASS	2013-05-16 12:12:33	/nfs/1000g-archive/vol1/ftp/data/NA12044/alignment/NA12044.mapped.ILLUMINA.bwa.CEU.low_coverage.20121211.bam		NA12044.mapped.ILLUMINA.bwa.CEU.low_coverage.20121211.bam
9830	HG00537.mapped.ILLUMINA.bwa.CHS.low_coverage.20120522.bam	HG00537	1	ALL	BAM	0.0105	0.01088	1243376	3.65	0.50259	0.00031	0.50213	0.00053	3.652	0.9997	CHS.omni_wg_2141_filtered.vcf.gz	PASS	2013-05-17 05:41:19	/nfs/1000g-archive/vol1/ftp/data/HG00537/alignment/HG00537.mapped.ILLUMINA.bwa.CHS.low_coverage.20120522.bam		HG00537.mapped.ILLUMINA.bwa.CHS.low_coverage.20120522.bam
11087	HG01075.mapped.ILLUMINA.bwa.PUR.low_coverage.20120522.bam	HG01075	1	ALL	BAM	0.01048	0	854341	15.16	0.50093	0.00031	0	0	0	0	PUR.wgs.coriell_phase3_samples.20121126.snps.affy_6.genotypes.vcf.gz	PASS	2013-05-16 11:31:55	/nfs/1000g-archive/vol1/ftp/data/HG01075/alignment/HG01075.mapped.ILLUMINA.bwa.PUR.low_coverage.20120522.bam		HG01075.mapped.ILLUMINA.bwa.PUR.low_coverage.20120522.bam
9386	NA12006.mapped.ILLUMINA.bwa.CEU.low_coverage.20121211.bam	NA12006	1	ALL	BAM	0.01043	0.01021	1400785	11.16	0.50128	0.00031	0.50233	0.0003	11.17	0.9999	CEU.omni_wg_2141_filtered.vcf.gz	PASS	2013-05-16 17:39:30	/nfs/1000g-archive/vol1/ftp/data/NA12006/alignment/NA12006.mapped.ILLUMINA.bwa.CEU.low_coverage.20121211.bam		NA12006.mapped.ILLUMINA.bwa.CEU.low_coverage.20121211.bam
8501	NA19084.mapped.ILLUMINA.bwa.JPT.low_coverage.20120522.bam	NA19084	1	ALL	BAM	0.01036	0.01225	1243522	5.02	0.50283	0.00058	0.50324	0.00078	5.024	1.0005	JPT.omni_wg_2141_filtered.vcf.gz	PASS	2013-05-16 23:43:07	/nfs/1000g-archive/vol1/ftp/data/NA19084/alignment/NA19084.mapped.ILLUMINA.bwa.JPT.low_coverage.20120522.bam		NA19084.mapped.ILLUMINA.bwa.JPT.low_coverage.20120522.bam
57491	HG00270.mapped.ILLUMINA.bwa.FIN.low_coverage.20130415.bam	HG00270	0	ALL	BAM	0.01034	0	712928	12.15	0.50082	0.00036	0	0	0	0	FIN.wgs.coriell_phase3_samples.20121126.snps.affy_6.genotypes.vcf.gz	PASS	2013-05-14 02:26:33	/nfs/1000g-archive/vol1/ftp/data/HG00270/alignment/HG00270.mapped.ILLUMINA.bwa.FIN.low_coverage.20130415.bam		HG00270.mapped.ILLUMINA.bwa.FIN.low_coverage.20130415.bam
8376	NA18539.mapped.ILLUMINA.bwa.CHB.low_coverage.20120522.bam	NA18539	1	ALL	BAM	0.01032	0.01289	1252142	4.75	0.50445	0.00045	0.50458	0.00061	4.773	0.9918	CHB.omni_wg_2141_filtered.vcf.gz	PASS	2013-05-16 23:12:03	/nfs/1000g-archive/vol1/ftp/data/NA18539/alignment/NA18539.mapped.ILLUMINA.bwa.CHB.low_coverage.20120522.bam		NA18539.mapped.ILLUMINA.bwa.CHB.low_coverage.20120522.bam
12653	HG03246.mapped.ILLUMINA.bwa.GWD.low_coverage.20121211.bam	HG03246	1	ALL	BAM	0.01032	0	1753219	6.28	0.49841	0.00079	0	0	0	0	ALL.omni_wg_2141_filtered.vcf.gz	PASS	2013-05-17 09:47:27	/nfs/1000g-archive/vol1/ftp/data/HG03246/alignment/HG03246.mapped.ILLUMINA.bwa.GWD.low_coverage.20121211.bam		HG03246.mapped.ILLUMINA.bwa.GWD.low_coverage.20121211.bam
10641	HG00126.mapped.ILLUMINA.bwa.GBR.low_coverage.20121211.bam	HG00126	1	ALL	BAM	0.01029	0.01086	1389642	7.06	0.503	0.00031	0.50304	0.00037	7.073	0.9989	GBR.omni_wg_2141_filtered.vcf.gz	PASS	2013-05-16 21:01:21	/nfs/1000g-archive/vol1/ftp/data/HG00126/alignment/HG00126.mapped.ILLUMINA.bwa.GBR.low_coverage.20121211.bam		HG00126.mapped.ILLUMINA.bwa.GBR.low_coverage.20121211.bam
10673	NA19445.mapped.ILLUMINA.bwa.LWK.low_coverage.20120522.bam	NA19445	1	ALL	BAM	0.01025	0.01201	1570264	8.94	0.5026	0.00082	0.50206	0.00095	8.936	1.0016	LWK.omni_wg_2141_filtered.vcf.gz	PASS	2013-05-16 15:19:35	/nfs/1000g-archive/vol1/ftp/data/NA19445/alignment/NA19445.mapped.ILLUMINA.bwa.LWK.low_coverage.20120522.bam		NA19445.mapped.ILLUMINA.bwa.LWK.low_coverage.20120522.bam
43119	HG03716.mapped.ILLUMINA.bwa.ITU.low_coverage.20130415.bam	HG03716	1	ALL	BAM	0.01023	0.01078	781365	10.31	0.50086	0.00043	0.5011	0.00043	10.276	1.0208	ITU.wgs.coriell_phase3_samples.20121126.snps.affy_6.genotypes.vcf.gz	PASS	2013-05-10 11:30:51	/nfs/1000g-archive/vol1/ftp/data/HG03716/alignment/HG03716.mapped.ILLUMINA.bwa.ITU.low_coverage.20130415.bam		HG03716.mapped.ILLUMINA.bwa.ITU.low_coverage.20130415.bam
9671	HG00367.mapped.ILLUMINA.bwa.FIN.low_coverage.20120522.bam	HG00367	1	ALL	BAM	0.01022	0	712928	3.56	0.50279	0.00208	0	0	0	0	FIN.wgs.coriell_phase3_samples.20121126.snps.affy_6.genotypes.vcf.gz	PASS	2013-05-16 15:28:51	/nfs/1000g-archive/vol1/ftp/data/HG00367/alignment/HG00367.mapped.ILLUMINA.bwa.FIN.low_coverage.20120522.bam		HG00367.mapped.ILLUMINA.bwa.FIN.low_coverage.20120522.bam
11273	HG00598.mapped.ILLUMINA.bwa.CHS.low_coverage.20121211.bam	HG00598	1	ALL	BAM	0.01006	0	1243376	9.08	0.5022	0.00111	0	0	0	0	CHS.omni_wg_2141_filtered.vcf.gz	PASS	2013-05-17 08:15:36	/nfs/1000g-archive/vol1/ftp/data/HG00598/alignment/HG00598.mapped.ILLUMINA.bwa.CHS.low_coverage.20121211.bam		HG00598.mapped.ILLUMINA.bwa.CHS.low_coverage.20121211.bam
31507	NA19798.mapped.ILLUMINA.bwa.MXL.low_coverage.20130415.bam	NA19798	0	ALL	BAM	0.01003	0	671518	3.89	0.50271	0.0003	0	0	0	0	MXL.wgs.coriell_phase3_samples.20121126.snps.affy_6.genotypes.vcf.gz	PASS	2013-05-08 00:39:59	/nfs/1000g-archive/vol1/ftp/data/NA19798/alignment/NA19798.mapped.ILLUMINA.bwa.MXL.low_coverage.20130415.bam		NA19798.mapped.ILLUMINA.bwa.MXL.low_coverage.20130415.bam
21213	HG03063.mapped.ILLUMINA.bwa.MSL.low_coverage.20130415.bam	HG03063	1	ALL	BAM	0.01001	0	1753219	7.93	0.49867	0.00072	0	0	0	0	ALL.omni_wg_2141_filtered.vcf.gz	PASS	2013-05-03 06:46:33	/nfs/1000g-archive/vol1/ftp/data/HG03063/alignment/HG03063.mapped.ILLUMINA.bwa.MSL.low_coverage.20130415.bam		HG03063.mapped.ILLUMINA.bwa.MSL.low_coverage.20130415.bam
49789	NA18951.mapped.ILLUMINA.bwa.JPT.low_coverage.20130415.bam	NA18951	1	ALL	BAM	0.00999	0.01005	1243522	5	0.5026	0.00083	0.50298	0.00093	5	0.9989	JPT.omni_wg_2141_filtered.vcf.gz	PASS	2013-05-10 22:06:22	/nfs/1000g-archive/vol1/ftp/data/NA18951/alignment/NA18951.mapped.ILLUMINA.bwa.JPT.low_coverage.20130415.bam		NA18951.mapped.ILLUMINA.bwa.JPT.low_coverage.20130415.bam
26926	HG03917.mapped.ILLUMINA.bwa.BEB.low_coverage.20130415.bam	HG03917	1	ALL	BAM	0.00993	0	1753219	6.63	0.50091	7e-05	0	0	0	0	ALL.omni_wg_2141_filtered.vcf.gz	PASS	2013-05-05 08:36:19	/nfs/1000g-archive/vol1/ftp/data/HG03917/alignment/HG03917.mapped.ILLUMINA.bwa.BEB.low_coverage.20130415.bam		HG03917.mapped.ILLUMINA.bwa.BEB.low_coverage.20130415.bam
8783	HG00155.mapped.ILLUMINA.bwa.GBR.low_coverage.20120522.bam	HG00155	1	ALL	BAM	0.00986	0.01008	1389642	5.26	0.50112	0.00036	0.50135	0.0005	5.261	1.0004	GBR.omni_wg_2141_filtered.vcf.gz	PASS	2013-05-17 05:55:01	/nfs/1000g-archive/vol1/ftp/data/HG00155/alignment/HG00155.mapped.ILLUMINA.bwa.GBR.low_coverage.20120522.bam		HG00155.mapped.ILLUMINA.bwa.GBR.low_coverage.20120522.bam
7581	HG00158.mapped.ILLUMINA.bwa.GBR.low_coverage.20120522.bam	HG00158	1	ALL	BAM	0.00982	0.00907	1389642	3.08	0.50355	0.00094	0.50265	0.00084	3.081	0.9997	GBR.omni_wg_2141_filtered.vcf.gz	PASS	2013-05-17 06:41:18	/nfs/1000g-archive/vol1/ftp/data/HG00158/alignment/HG00158.mapped.ILLUMINA.bwa.GBR.low_coverage.20120522.bam		HG00158.mapped.ILLUMINA.bwa.GBR.low_coverage.20120522.bam
12382	HG03594.mapped.ILLUMINA.bwa.BEB.low_coverage.20121211.bam	HG03594	1	ALL	BAM	0.00976	0	1753219	6.45	0.5026	0.0002	0	0	0	0	ALL.omni_wg_2141_filtered.vcf.gz	PASS	2013-05-17 07:52:49	/nfs/1000g-archive/vol1/ftp/data/HG03594/alignment/HG03594.mapped.ILLUMINA.bwa.BEB.low_coverage.20121211.bam		HG03594.mapped.ILLUMINA.bwa.BEB.low_coverage.20121211.bam
6713	NA18538.mapped.ILLUMINA.bwa.CHB.low_coverage.20120522.bam	NA18538	1	ALL	BAM	0.00973	0.0107	1252142	5.75	0.50282	0.00046	0.50245	0.00041	5.761	0.9977	CHB.omni_wg_2141_filtered.vcf.gz	PASS	2013-05-16 16:41:21	/nfs/1000g-archive/vol1/ftp/data/NA18538/alignment/NA18538.mapped.ILLUMINA.bwa.CHB.low_coverage.20120522.bam		NA18538.mapped.ILLUMINA.bwa.CHB.low_coverage.20120522.bam
46465	HG03716.mapped.ILLUMINA.bwa.ITU.low_coverage.20130415.bam	HG03716	1	ALL	BAM	0.0097	0	1753219	10.23	0.5016	0.00036	0	0	0	0	ALL.omni_wg_2141_filtered.vcf.gz	PASS	2013-05-10 13:45:58	/nfs/1000g-archive/vol1/ftp/data/HG03716/alignment/HG03716.mapped.ILLUMINA.bwa.ITU.low_coverage.20130415.bam		HG03716.mapped.ILLUMINA.bwa.ITU.low_coverage.20130415.bam
10041	NA19678.mapped.ILLUMINA.bwa.MXL.low_coverage.20120522.bam	NA19678	1	ALL	BAM	0.00959	0.00932	1437703	9.75	0.50118	0.00037	0.50161	0.00037	9.764	0.9995	MXL.omni_wg_2141_filtered.vcf.gz	PASS	2013-05-17 11:54:28	/nfs/1000g-archive/vol1/ftp/data/NA19678/alignment/NA19678.mapped.ILLUMINA.bwa.MXL.low_coverage.20120522.bam		NA19678.mapped.ILLUMINA.bwa.MXL.low_coverage.20120522.bam
9912	NA19350.mapped.ILLUMINA.bwa.LWK.low_coverage.20120522.bam	NA19350	1	ALL	BAM	0.00952	0.01017	1570264	6.92	0.50319	0.00035	0.50371	0.00047	6.942	0.9974	LWK.omni_wg_2141_filtered.vcf.gz	PASS	2013-05-17 09:59:23	/nfs/1000g-archive/vol1/ftp/data/NA19350/alignment/NA19350.mapped.ILLUMINA.bwa.LWK.low_coverage.20120522.bam		NA19350.mapped.ILLUMINA.bwa.LWK.low_coverage.20120522.bam
7871	HG02224.mapped.ILLUMINA.bwa.IBS.low_coverage.20120522.bam	HG02224	1	ALL	BAM	0.00941	0.00902	1400201	3.2	0.50433	0.00063	0.50306	0.00067	3.199	1.0001	IBS.omni_wg_2141_filtered.vcf.gz	PASS	2013-05-16 23:35:34	/nfs/1000g-archive/vol1/ftp/data/HG02224/alignment/HG02224.mapped.ILLUMINA.bwa.IBS.low_coverage.20120522.bam		HG02224.mapped.ILLUMINA.bwa.IBS.low_coverage.20120522.bam
40919	NA20808.mapped.ILLUMINA.bwa.TSI.low_coverage.20130415.bam	NA20808	1	ALL	BAM	0.00932	0.00926	1402149	5.42	0.50194	0.00045	0.50145	0.0005	5.425	0.9996	TSI.omni_wg_2141_filtered.vcf.gz	PASS	2013-05-10 09:34:24	/nfs/1000g-archive/vol1/ftp/data/NA20808/alignment/NA20808.mapped.ILLUMINA.bwa.TSI.low_coverage.20130415.bam		NA20808.mapped.ILLUMINA.bwa.TSI.low_coverage.20130415.bam
45373	NA20772.mapped.ILLUMINA.bwa.TSI.low_coverage.20130415.bam	NA20772	1	ALL	BAM	0.00926	0.00938	1402149	5.62	0.50108	0.00046	0.50181	0.00055	5.625	0.9994	TSI.omni_wg_2141_filtered.vcf.gz	PASS	2013-05-10 13:10:59	/nfs/1000g-archive/vol1/ftp/data/NA20772/alignment/NA20772.mapped.ILLUMINA.bwa.TSI.low_coverage.20130415.bam		NA20772.mapped.ILLUMINA.bwa.TSI.low_coverage.20130415.bam
16067	HG02154.mapped.ILLUMINA.bwa.CDX.low_coverage.20130415.bam	HG02154	1	ALL	BAM	0.00925	0.01201	1235978	4.52	0.50264	0.00031	0.50223	0.00044	4.527	0.9985	CDX.omni_wg_2141_filtered.vcf.gz	PASS	2013-04-30 18:32:07	/nfs/1000g-archive/vol1/ftp/data/HG02154/alignment/HG02154.mapped.ILLUMINA.bwa.CDX.low_coverage.20130415.bam		HG02154.mapped.ILLUMINA.bwa.CDX.low_coverage.20130415.bam
16104	HG02180.mapped.ILLUMINA.bwa.CDX.low_coverage.20130415.bam	HG02180	1	ALL	BAM	0.00924	0	665690	4.35	0.50717	0.00223	0	0	0	0	CDX.wgs.coriell_phase3_samples.20121126.snps.affy_6.genotypes.vcf.gz	PASS	2013-04-30 18:36:57	/nfs/1000g-archive/vol1/ftp/data/HG02180/alignment/HG02180.mapped.ILLUMINA.bwa.CDX.low_coverage.20130415.bam		HG02180.mapped.ILLUMINA.bwa.CDX.low_coverage.20130415.bam
34150	NA20508.mapped.ILLUMINA.bwa.TSI.low_coverage.20130415.bam	NA20508	1	ALL	BAM	0.00924	0	887456	6.48	0.50425	0.00095	0	0	0	0	ALL.wgs.coriell_phase3_samples.20121126.snps.affy_6.genotypes.vcf.gz	PASS	2013-05-08 04:40:50	/nfs/1000g-archive/vol1/ftp/data/NA20508/alignment/NA20508.mapped.ILLUMINA.bwa.TSI.low_coverage.20130415.bam		NA20508.mapped.ILLUMINA.bwa.TSI.low_coverage.20130415.bam
45685	NA20543.mapped.ILLUMINA.bwa.TSI.low_coverage.20130415.bam	NA20543	1	ALL	BAM	0.00918	0.00892	1402149	8.87	0.50081	0.00037	0.5026	0.00048	8.883	0.9987	TSI.omni_wg_2141_filtered.vcf.gz	PASS	2013-05-10 13:19:03	/nfs/1000g-archive/vol1/ftp/data/NA20543/alignment/NA20543.mapped.ILLUMINA.bwa.TSI.low_coverage.20130415.bam		NA20543.mapped.ILLUMINA.bwa.TSI.low_coverage.20130415.bam
6575	HG00637.mapped.ILLUMINA.bwa.PUR.low_coverage.20120522.bam	HG00637	1	ALL	BAM	0.00917	0.00927	1558284	3.2	0.50405	0.00109	0.50234	0.00071	3.204	1.0002	PUR.omni_wg_2141_filtered.vcf.gz	PASS	2013-05-17 08:56:26	/nfs/1000g-archive/vol1/ftp/data/HG00637/alignment/HG00637.mapped.ILLUMINA.bwa.PUR.low_coverage.20120522.bam		HG00637.mapped.ILLUMINA.bwa.PUR.low_coverage.20120522.bam
10213	NA20847.mapped.ILLUMINA.bwa.GIH.low_coverage.20120522.bam	NA20847	1	ALL	BAM	0.00913	0.00901	1368816	4	0.50285	0.00039	0.50289	0.0007	4.009	0.9969	GIH.omni_wg_2141_filtered.vcf.gz	PASS	2013-05-16 19:21:51	/nfs/1000g-archive/vol1/ftp/data/NA20847/alignment/NA20847.mapped.ILLUMINA.bwa.GIH.low_coverage.20120522.bam		NA20847.mapped.ILLUMINA.bwa.GIH.low_coverage.20120522.bam
12616	HG00623.mapped.ILLUMINA.bwa.CHS.low_coverage.20121211.bam	HG00623	1	ALL	BAM	0.00912	0.00856	662328	10.31	0.50147	0.00059	0.50207	0.00068	10.339	0.9945	CHS.wgs.coriell_phase3_samples.20121126.snps.affy_6.genotypes.vcf.gz	PASS	2013-05-16 13:52:39	/nfs/1000g-archive/vol1/ftp/data/HG00623/alignment/HG00623.mapped.ILLUMINA.bwa.CHS.low_coverage.20121211.bam		HG00623.mapped.ILLUMINA.bwa.CHS.low_coverage.20121211.bam
6856	NA19704.mapped.ILLUMINA.bwa.ASW.low_coverage.20120522.bam	NA19704	1	ALL	BAM	0.0091	0.00971	1675632	5.21	0.50234	0.00017	0.50503	0.00053	5.248	0.9859	ASW.omni_wg_2141_filtered.vcf.gz	PASS	2013-05-16 15:12:59	/nfs/1000g-archive/vol1/ftp/data/NA19704/alignment/NA19704.mapped.ILLUMINA.bwa.ASW.low_coverage.20120522.bam		NA19704.mapped.ILLUMINA.bwa.ASW.low_coverage.20120522.bam
7776	HG02360.mapped.ILLUMINA.bwa.CDX.low_coverage.20120522.bam	HG02360	1	ALL	BAM	0.00904	0.00868	1235978	6.85	0.50173	0.00041	0.50209	0.00041	6.851	1.0013	CDX.omni_wg_2141_filtered.vcf.gz	PASS	2013-05-17 09:20:21	/nfs/1000g-archive/vol1/ftp/data/HG02360/alignment/HG02360.mapped.ILLUMINA.bwa.CDX.low_coverage.20120522.bam		HG02360.mapped.ILLUMINA.bwa.CDX.low_coverage.20120522.bam
9878	NA19657.mapped.ILLUMINA.bwa.MXL.low_coverage.20120522.bam	NA19657	1	ALL	BAM	0.00897	0.00836	1437703	4.74	0.50213	0.00042	0.50214	0.00062	4.753	0.9967	MXL.omni_wg_2141_filtered.vcf.gz	PASS	2013-05-16 21:37:42	/nfs/1000g-archive/vol1/ftp/data/NA19657/alignment/NA19657.mapped.ILLUMINA.bwa.MXL.low_coverage.20120522.bam		NA19657.mapped.ILLUMINA.bwa.MXL.low_coverage.20120522.bam
12433	NA20846.mapped.ILLUMINA.bwa.GIH.low_coverage.20120522.bam	NA20846	1	ALL	BAM	0.00891	0	887456	4.81	0.50435	0.00055	0	0	0	0	ALL.wgs.coriell_phase3_samples.20121126.snps.affy_6.genotypes.vcf.gz	PASS	2013-05-16 13:36:45	/nfs/1000g-archive/vol1/ftp/data/NA20846/alignment/NA20846.mapped.ILLUMINA.bwa.GIH.low_coverage.20120522.bam		NA20846.mapped.ILLUMINA.bwa.GIH.low_coverage.20120522.bam
8460	NA11832.mapped.ILLUMINA.bwa.CEU.low_coverage.20120522.bam	NA11832	1	ALL	BAM	0.00888	0.0087	1400785	14.63	0.50272	0.00063	0.50339	0.00077	14.671	0.9982	CEU.omni_wg_2141_filtered.vcf.gz	PASS	2013-05-17 02:19:32	/nfs/1000g-archive/vol1/ftp/data/NA11832/alignment/NA11832.mapped.ILLUMINA.bwa.CEU.low_coverage.20120522.bam		NA11832.mapped.ILLUMINA.bwa.CEU.low_coverage.20120522.bam
22284	HG03754.mapped.ILLUMINA.bwa.STU.low_coverage.20130415.bam	HG03754	1	ALL	BAM	0.00882	0.00867	779732	11.26	0.50144	0.00027	0.50103	0.00033	11.287	0.9966	STU.wgs.coriell_phase3_samples.20121126.snps.affy_6.genotypes.vcf.gz	PASS	2013-05-03 10:10:27	/nfs/1000g-archive/vol1/ftp/data/HG03754/alignment/HG03754.mapped.ILLUMINA.bwa.STU.low_coverage.20130415.bam		HG03754.mapped.ILLUMINA.bwa.STU.low_coverage.20130415.bam
12491	HG00728.mapped.ILLUMINA.bwa.CHS.low_coverage.20121211.bam	HG00728	1	ALL	BAM	0.00877	0	1243376	8.51	0.50278	0.00124	0	0	0	0	CHS.omni_wg_2141_filtered.vcf.gz	PASS	2013-05-17 04:44:00	/nfs/1000g-archive/vol1/ftp/data/HG00728/alignment/HG00728.mapped.ILLUMINA.bwa.CHS.low_coverage.20121211.bam		HG00728.mapped.ILLUMINA.bwa.CHS.low_coverage.20121211.bam
12679	NA12342.mapped.ILLUMINA.bwa.CEU.low_coverage.20120522.bam	NA12342	1	ALL	BAM	0.00869	0	887456	14.96	0.50034	9e-05	0	0	0	0	ALL.wgs.coriell_phase3_samples.20121126.snps.affy_6.genotypes.vcf.gz	PASS	2013-05-16 09:28:24	/nfs/1000g-archive/vol1/ftp/data/NA12342/alignment/NA12342.mapped.ILLUMINA.bwa.CEU.low_coverage.20120522.bam		NA12342.mapped.ILLUMINA.bwa.CEU.low_coverage.20120522.bam
13120	HG03479.mapped.ILLUMINA.bwa.MSL.low_coverage.20121211.bam	HG03479	1	ALL	BAM	0.00868	0.00851	838168	8.36	0.50186	0.00089	0.5017	0.00092	8.381	0.9975	MSL.wgs.coriell_phase3_samples.20121126.snps.affy_6.genotypes.vcf.gz	PASS	2013-05-16 19:25:07	/nfs/1000g-archive/vol1/ftp/data/HG03479/alignment/HG03479.mapped.ILLUMINA.bwa.MSL.low_coverage.20121211.bam		HG03479.mapped.ILLUMINA.bwa.MSL.low_coverage.20121211.bam
12919	HG00623.mapped.ILLUMINA.bwa.CHS.low_coverage.20121211.bam	HG00623	1	ALL	BAM	0.0085	0	1243376	10.1	0.50165	0.00086	0	0	0	0	CHS.omni_wg_2141_filtered.vcf.gz	PASS	2013-05-17 14:36:36	/nfs/1000g-archive/vol1/ftp/data/HG00623/alignment/HG00623.mapped.ILLUMINA.bwa.CHS.low_coverage.20121211.bam		HG00623.mapped.ILLUMINA.bwa.CHS.low_coverage.20121211.bam
12378	HG00728.mapped.ILLUMINA.bwa.CHS.low_coverage.20121211.bam	HG00728	1	ALL	BAM	0.00849	0.00857	662328	8.53	0.50206	0.00117	0.5017	0.00118	8.512	1.0217	CHS.wgs.coriell_phase3_samples.20121126.snps.affy_6.genotypes.vcf.gz	PASS	2013-05-16 10:36:56	/nfs/1000g-archive/vol1/ftp/data/HG00728/alignment/HG00728.mapped.ILLUMINA.bwa.CHS.low_coverage.20121211.bam		HG00728.mapped.ILLUMINA.bwa.CHS.low_coverage.20121211.bam
47346	HG03108.mapped.ILLUMINA.bwa.ESN.low_coverage.20130422.bam	HG03108	1	ALL	BAM	0.00841	0	1753219	9.44	0.50036	0.00048	0	0	0	0	ALL.omni_wg_2141_filtered.vcf.gz	PASS	2013-05-10 16:31:11	/nfs/1000g-archive/vol1/ftp/data/HG03108/alignment/HG03108.mapped.ILLUMINA.bwa.ESN.low_coverage.20130422.bam		HG03108.mapped.ILLUMINA.bwa.ESN.low_coverage.20130422.bam
26708	NA07357.mapped.ILLUMINA.bwa.CEU.low_coverage.20130415.bam	NA07357	1	ALL	BAM	0.00839	0	887456	5.99	0.50457	0.00097	0	0	0	0	ALL.wgs.coriell_phase3_samples.20121126.snps.affy_6.genotypes.vcf.gz	PASS	2013-05-05 08:22:26	/nfs/1000g-archive/vol1/ftp/data/NA07357/alignment/NA07357.mapped.ILLUMINA.bwa.CEU.low_coverage.20130415.bam		NA07357.mapped.ILLUMINA.bwa.CEU.low_coverage.20130415.bam
35952	NA20525.mapped.ILLUMINA.bwa.TSI.low_coverage.20130415.bam	NA20525	1	ALL	BAM	0.00834	0.00809	1402149	7.64	0.50161	0.00043	0.50159	0.00046	7.653	0.9999	TSI.omni_wg_2141_filtered.vcf.gz	PASS	2013-05-09 02:00:31	/nfs/1000g-archive/vol1/ftp/data/NA20525/alignment/NA20525.mapped.ILLUMINA.bwa.TSI.low_coverage.20130415.bam		NA20525.mapped.ILLUMINA.bwa.TSI.low_coverage.20130415.bam
34251	NA20531.mapped.ILLUMINA.bwa.TSI.low_coverage.20130415.bam	NA20531	1	ALL	BAM	0.00833	0	887456	6.47	0.50384	0.00098	0	0	0	0	ALL.wgs.coriell_phase3_samples.20121126.snps.affy_6.genotypes.vcf.gz	PASS	2013-05-08 04:48:35	/nfs/1000g-archive/vol1/ftp/data/NA20531/alignment/NA20531.mapped.ILLUMINA.bwa.TSI.low_coverage.20130415.bam		NA20531.mapped.ILLUMINA.bwa.TSI.low_coverage.20130415.bam
48948	NA20803.mapped.ILLUMINA.bwa.TSI.low_coverage.20130415.bam	NA20803	1	ALL	BAM	0.00827	0	887456	5.54	0.50585	0.00103	0	0	0	0	ALL.wgs.coriell_phase3_samples.20121126.snps.affy_6.genotypes.vcf.gz	PASS	2013-05-10 20:31:53	/nfs/1000g-archive/vol1/ftp/data/NA20803/alignment/NA20803.mapped.ILLUMINA.bwa.TSI.low_coverage.20130415.bam		NA20803.mapped.ILLUMINA.bwa.TSI.low_coverage.20130415.bam
21154	HG03309.mapped.ILLUMINA.bwa.ESN.low_coverage.20130415.bam	HG03309	0	ALL	BAM	0.00826	0.00793	835395	5.92	0.50238	0.00048	0.50212	0.00046	5.93	0.9988	ESN.wgs.coriell_phase3_samples.20121126.snps.affy_6.genotypes.vcf.gz	PASS	2013-05-03 06:26:36	/nfs/1000g-archive/vol1/ftp/data/HG03309/alignment/HG03309.mapped.ILLUMINA.bwa.ESN.low_coverage.20130415.bam		HG03309.mapped.ILLUMINA.bwa.ESN.low_coverage.20130415.bam
12607	NA19445.mapped.ILLUMINA.bwa.LWK.low_coverage.20120522.bam	NA19445	1	ALL	BAM	0.00819	0	887456	9.1	0.50092	0.00019	0	0	0	0	ALL.wgs.coriell_phase3_samples.20121126.snps.affy_6.genotypes.vcf.gz	PASS	2013-05-16 13:55:01	/nfs/1000g-archive/vol1/ftp/data/NA19445/alignment/NA19445.mapped.ILLUMINA.bwa.LWK.low_coverage.20120522.bam		NA19445.mapped.ILLUMINA.bwa.LWK.low_coverage.20120522.bam
13012	HG02613.mapped.ILLUMINA.bwa.GWD.low_coverage.20121211.bam	HG02613	1	ALL	BAM	0.00818	0.00827	840560	8.32	0.50088	0.00043	0.50123	0.0005	8.297	1.0237	GWD.wgs.coriell_phase3_samples.20121126.snps.affy_6.genotypes.vcf.gz	PASS	2013-05-17 01:27:53	/nfs/1000g-archive/vol1/ftp/data/HG02613/alignment/HG02613.mapped.ILLUMINA.bwa.GWD.low_coverage.20121211.bam		HG02613.mapped.ILLUMINA.bwa.GWD.low_coverage.20121211.bam
8899	HG00244.mapped.ILLUMINA.bwa.GBR.low_coverage.20121211.bam	HG00244	1	ALL	BAM	0.00818	0.00787	1389642	7.49	0.50205	0.0002	0.50213	0.00027	7.502	0.998	GBR.omni_wg_2141_filtered.vcf.gz	PASS	2013-05-17 01:50:41	/nfs/1000g-archive/vol1/ftp/data/HG00244/alignment/HG00244.mapped.ILLUMINA.bwa.GBR.low_coverage.20121211.bam		HG00244.mapped.ILLUMINA.bwa.GBR.low_coverage.20121211.bam
32616	NA19147.mapped.ILLUMINA.bwa.YRI.low_coverage.20130415.bam	NA19147	1	ALL	BAM	0.00815	0.00765	1559108	5.23	0.50188	0.00107	0.50255	0.00101	5.227	0.9999	YRI.omni_wg_2141_filtered.vcf.gz	PASS	2013-05-08 02:35:12	/nfs/1000g-archive/vol1/ftp/data/NA19147/alignment/NA19147.mapped.ILLUMINA.bwa.YRI.low_coverage.20130415.bam		NA19147.mapped.ILLUMINA.bwa.YRI.low_coverage.20130415.bam
12944	NA20869.mapped.ILLUMINA.bwa.GIH.low_coverage.20120522.bam	NA20869	1	ALL	BAM	0.00812	0	887456	5.32	0.50286	0.00049	0	0	0	0	ALL.wgs.coriell_phase3_samples.20121126.snps.affy_6.genotypes.vcf.gz	PASS	2013-05-16 09:17:37	/nfs/1000g-archive/vol1/ftp/data/NA20869/alignment/NA20869.mapped.ILLUMINA.bwa.GIH.low_coverage.20120522.bam		NA20869.mapped.ILLUMINA.bwa.GIH.low_coverage.20120522.bam
16349	HG00457.mapped.ILLUMINA.bwa.CHS.low_coverage.20130415.bam	HG00457	1	ALL	BAM	0.00805	0.00805	1243376	7.4	0.50025	0.00014	0.50044	0.00025	7.404	1.0004	CHS.omni_wg_2141_filtered.vcf.gz	PASS	2013-04-30 18:56:27	/nfs/1000g-archive/vol1/ftp/data/HG00457/alignment/HG00457.mapped.ILLUMINA.bwa.CHS.low_coverage.20130415.bam		HG00457.mapped.ILLUMINA.bwa.CHS.low_coverage.20130415.bam
11438	HG02696.mapped.ILLUMINA.bwa.PJL.low_coverage.20121211.bam	HG02696	1	ALL	BAM	0.00803	0	1753219	9.41	0.50168	0.00028	0	0	0	0	ALL.omni_wg_2141_filtered.vcf.gz	PASS	2013-05-17 12:35:01	/nfs/1000g-archive/vol1/ftp/data/HG02696/alignment/HG02696.mapped.ILLUMINA.bwa.PJL.low_coverage.20121211.bam		HG02696.mapped.ILLUMINA.bwa.PJL.low_coverage.20121211.bam
23156	HG03754.mapped.ILLUMINA.bwa.STU.low_coverage.20130415.bam	HG03754	1	ALL	BAM	0.00791	0	1753219	10.97	0.50144	0.00036	0	0	0	0	ALL.omni_wg_2141_filtered.vcf.gz	PASS	2013-05-03 13:03:16	/nfs/1000g-archive/vol1/ftp/data/HG03754/alignment/HG03754.mapped.ILLUMINA.bwa.STU.low_coverage.20130415.bam		HG03754.mapped.ILLUMINA.bwa.STU.low_coverage.20130415.bam
16095	HG02358.mapped.ILLUMINA.bwa.CDX.low_coverage.20130415.bam	HG02358	0	ALL	BAM	0.0079	0.00592	665690	4.39	0.50036	0.00059	0.50087	0.00061	4.368	1.0234	CDX.wgs.coriell_phase3_samples.20121126.snps.affy_6.genotypes.vcf.gz	PASS	2013-04-30 18:35:44	/nfs/1000g-archive/vol1/ftp/data/HG02358/alignment/HG02358.mapped.ILLUMINA.bwa.CDX.low_coverage.20130415.bam		HG02358.mapped.ILLUMINA.bwa.CDX.low_coverage.20130415.bam
9443	HG00537.mapped.ILLUMINA.bwa.CHS.low_coverage.20120522.bam	HG00537	1	ALL	BAM	0.00787	0	662328	3.88	0.50421	0.00092	0	0	0	0	CHS.wgs.coriell_phase3_samples.20121126.snps.affy_6.genotypes.vcf.gz	PASS	2013-05-16 18:16:08	/nfs/1000g-archive/vol1/ftp/data/HG00537/alignment/HG00537.mapped.ILLUMINA.bwa.CHS.low_coverage.20120522.bam		HG00537.mapped.ILLUMINA.bwa.CHS.low_coverage.20120522.bam
57984	HG03121.mapped.ILLUMINA.bwa.ESN.low_coverage.20130415.bam	HG03121	1	ALL	BAM	0.00786	0.00781	835395	8.72	0.50034	0.0001	0.50072	0.00016	8.746	0.9982	ESN.wgs.coriell_phase3_samples.20121126.snps.affy_6.genotypes.vcf.gz	PASS	2013-05-14 02:47:32	/nfs/1000g-archive/vol1/ftp/data/HG03121/alignment/HG03121.mapped.ILLUMINA.bwa.ESN.low_coverage.20130415.bam		HG03121.mapped.ILLUMINA.bwa.ESN.low_coverage.20130415.bam
32675	NA18907.mapped.ILLUMINA.bwa.YRI.low_coverage.20130415.bam	NA18907	1	ALL	BAM	0.00777	0.00713	1559108	5.57	0.50084	0.0003	0.50281	0.00053	5.575	0.9992	YRI.omni_wg_2141_filtered.vcf.gz	PASS	2013-05-08 02:41:56	/nfs/1000g-archive/vol1/ftp/data/NA18907/alignment/NA18907.mapped.ILLUMINA.bwa.YRI.low_coverage.20130415.bam		NA18907.mapped.ILLUMINA.bwa.YRI.low_coverage.20130415.bam
12475	HG03539.mapped.ILLUMINA.bwa.GWD.low_coverage.20121211.bam	HG03539	1	ALL	BAM	0.00776	0.00796	840560	5.81	0.50237	0.0002	0.50121	5e-05	5.814	0.9992	GWD.wgs.coriell_phase3_samples.20121126.snps.affy_6.genotypes.vcf.gz	PASS	2013-05-16 11:55:20	/nfs/1000g-archive/vol1/ftp/data/HG03539/alignment/HG03539.mapped.ILLUMINA.bwa.GWD.low_coverage.20121211.bam		HG03539.mapped.ILLUMINA.bwa.GWD.low_coverage.20121211.bam
26957	NA18502.mapped.ILLUMINA.bwa.YRI.low_coverage.20130415.bam	NA18502	1	ALL	BAM	0.00775	0.00679	1559108	5.2	0.50192	0.00114	0.50266	0.0013	5.206	0.9995	YRI.omni_wg_2141_filtered.vcf.gz	PASS	2013-05-05 08:43:10	/nfs/1000g-archive/vol1/ftp/data/NA18502/alignment/NA18502.mapped.ILLUMINA.bwa.YRI.low_coverage.20130415.bam		NA18502.mapped.ILLUMINA.bwa.YRI.low_coverage.20130415.bam
25910	HG04195.mapped.ILLUMINA.bwa.BEB.low_coverage.20130415.bam	HG04195	1	ALL	BAM	0.00772	0.00797	783628	7.69	0.50059	4e-05	0.50053	6e-05	7.691	1.0017	BEB.wgs.coriell_phase3_samples.20121126.snps.affy_6.genotypes.vcf.gz	PASS	2013-05-05 07:01:10	/nfs/1000g-archive/vol1/ftp/data/HG04195/alignment/HG04195.mapped.ILLUMINA.bwa.BEB.low_coverage.20130415.bam		HG04195.mapped.ILLUMINA.bwa.BEB.low_coverage.20130415.bam
6717	HG01107.mapped.ILLUMINA.bwa.PUR.low_coverage.20120522.bam	HG01107	1	ALL	BAM	0.00768	0.00778	1558284	4.93	0.50106	0.00061	0.50159	0.00039	4.944	0.9956	PUR.omni_wg_2141_filtered.vcf.gz	PASS	2013-05-16 19:40:23	/nfs/1000g-archive/vol1/ftp/data/HG01107/alignment/HG01107.mapped.ILLUMINA.bwa.PUR.low_coverage.20120522.bam		HG01107.mapped.ILLUMINA.bwa.PUR.low_coverage.20120522.bam
40448	HG03884.mapped.ILLUMINA.bwa.STU.low_coverage.20130415.bam	HG03884	1	ALL	BAM	0.00764	0.00788	779732	9.58	0.50233	0.00053	0.50253	0.00054	9.613	0.995	STU.wgs.coriell_phase3_samples.20121126.snps.affy_6.genotypes.vcf.gz	PASS	2013-05-10 08:46:47	/nfs/1000g-archive/vol1/ftp/data/HG03884/alignment/HG03884.mapped.ILLUMINA.bwa.STU.low_coverage.20130415.bam		HG03884.mapped.ILLUMINA.bwa.STU.low_coverage.20130415.bam
12450	HG04149.mapped.ILLUMINA.bwa.BEB.low_coverage.20121211.bam	HG04149	0	ALL	BAM	0.00753	0	783628	6.25	0.50009	0.00015	0	0	0	0	BEB.wgs.coriell_phase3_samples.20121126.snps.affy_6.genotypes.vcf.gz	PASS	2013-05-16 18:14:09	/nfs/1000g-archive/vol1/ftp/data/HG04149/alignment/HG04149.mapped.ILLUMINA.bwa.BEB.low_coverage.20121211.bam		HG04149.mapped.ILLUMINA.bwa.BEB.low_coverage.20121211.bam
12042	HG02696.mapped.ILLUMINA.bwa.PJL.low_coverage.20121211.bam	HG02696	1	ALL	BAM	0.00747	0.00779	781539	9.48	0.50119	0.00058	0.5012	0.00056	9.448	1.0203	PJL.wgs.coriell_phase3_samples.20121126.snps.affy_6.genotypes.vcf.gz	PASS	2013-05-16 17:35:44	/nfs/1000g-archive/vol1/ftp/data/HG02696/alignment/HG02696.mapped.ILLUMINA.bwa.PJL.low_coverage.20121211.bam		HG02696.mapped.ILLUMINA.bwa.PJL.low_coverage.20121211.bam
28519	NA12777.mapped.ILLUMINA.bwa.CEU.low_coverage.20130415.bam	NA12777	1	ALL	BAM	0.00746	0.00733	1400785	8.94	0.50101	0.00027	0.50228	0.00038	8.953	1	CEU.omni_wg_2141_filtered.vcf.gz	PASS	2013-05-05 11:48:45	/nfs/1000g-archive/vol1/ftp/data/NA12777/alignment/NA12777.mapped.ILLUMINA.bwa.CEU.low_coverage.20130415.bam		NA12777.mapped.ILLUMINA.bwa.CEU.low_coverage.20130415.bam
6666	NA07048.mapped.ILLUMINA.bwa.CEU.low_coverage.20120522.bam	NA07048	1	ALL	BAM	0.00742	0.00799	1400785	4.73	0.50207	0.00054	0.50301	0.00054	4.739	0.9974	CEU.omni_wg_2141_filtered.vcf.gz	PASS	2013-05-17 08:28:10	/nfs/1000g-archive/vol1/ftp/data/NA07048/alignment/NA07048.mapped.ILLUMINA.bwa.CEU.low_coverage.20120522.bam		NA07048.mapped.ILLUMINA.bwa.CEU.low_coverage.20120522.bam
35618	NA20320.mapped.ILLUMINA.bwa.ASW.low_coverage.20130415.bam	NA20320	1	ALL	BAM	0.00741	0.00562	718973	7.95	0.50029	8e-05	0.50106	0.0001	7.963	0.9982	ASW.wgs.coriell_phase3_samples.20121126.snps.affy_6.genotypes.vcf.gz	PASS	2013-05-08 21:09:36	/nfs/1000g-archive/vol1/ftp/data/NA20320/alignment/NA20320.mapped.ILLUMINA.bwa.ASW.low_coverage.20130415.bam		NA20320.mapped.ILLUMINA.bwa.ASW.low_coverage.20130415.bam
9127	HG00131.mapped.ILLUMINA.bwa.GBR.low_coverage.20120522.bam	HG00131	1	ALL	BAM	0.00738	0.00787	1389642	4.85	0.50204	0.00045	0.50206	0.0005	4.858	0.9982	GBR.omni_wg_2141_filtered.vcf.gz	PASS	2013-05-17 00:09:53	/nfs/1000g-archive/vol1/ftp/data/HG00131/alignment/HG00131.mapped.ILLUMINA.bwa.GBR.low_coverage.20120522.bam		HG00131.mapped.ILLUMINA.bwa.GBR.low_coverage.20120522.bam
10562	HG00116.mapped.ILLUMINA.bwa.GBR.low_coverage.20120522.bam	HG00116	1	ALL	BAM	0.00738	0.00718	1389642	4.52	0.50075	0.00058	0.50215	0.00063	4.52	0.9995	GBR.omni_wg_2141_filtered.vcf.gz	PASS	2013-05-17 04:43:13	/nfs/1000g-archive/vol1/ftp/data/HG00116/alignment/HG00116.mapped.ILLUMINA.bwa.GBR.low_coverage.20120522.bam		HG00116.mapped.ILLUMINA.bwa.GBR.low_coverage.20120522.bam
21784	HG03297.mapped.ILLUMINA.bwa.ESN.low_coverage.20130415.bam	HG03297	1	ALL	BAM	0.00737	0.0075	835395	8.15	0.50019	5e-05	0.50131	8e-05	8.152	1.0003	ESN.wgs.coriell_phase3_samples.20121126.snps.affy_6.genotypes.vcf.gz	PASS	2013-05-03 08:26:45	/nfs/1000g-archive/vol1/ftp/data/HG03297/alignment/HG03297.mapped.ILLUMINA.bwa.ESN.low_coverage.20130415.bam		HG03297.mapped.ILLUMINA.bwa.ESN.low_coverage.20130415.bam
13112	HG02455.mapped.ILLUMINA.bwa.ACB.low_coverage.20121211.bam	HG02455	1	ALL	BAM	0.00736	0.0082	849391	6.64	0.50166	0.00023	0.50135	0.00011	6.619	1.0219	ACB.wgs.coriell_phase3_samples.20121126.snps.affy_6.genotypes.vcf.gz	PASS	2013-05-16 11:14:45	/nfs/1000g-archive/vol1/ftp/data/HG02455/alignment/HG02455.mapped.ILLUMINA.bwa.ACB.low_coverage.20121211.bam		HG02455.mapped.ILLUMINA.bwa.ACB.low_coverage.20121211.bam
42283	HG03884.mapped.ILLUMINA.bwa.STU.low_coverage.20130415.bam	HG03884	1	ALL	BAM	0.00736	0	1753219	9.38	0.50223	0.0003	0	0	0	0	ALL.omni_wg_2141_filtered.vcf.gz	PASS	2013-05-10 10:51:56	/nfs/1000g-archive/vol1/ftp/data/HG03884/alignment/HG03884.mapped.ILLUMINA.bwa.STU.low_coverage.20130415.bam		HG03884.mapped.ILLUMINA.bwa.STU.low_coverage.20130415.bam
12917	NA19043.mapped.ILLUMINA.bwa.LWK.low_coverage.20121211.bam	NA19043	1	ALL	BAM	0.00735	0	1570264	8	0.50204	0.00083	0	0	0	0	LWK.omni_wg_2141_filtered.vcf.gz	PASS	2013-05-17 01:28:46	/nfs/1000g-archive/vol1/ftp/data/NA19043/alignment/NA19043.mapped.ILLUMINA.bwa.LWK.low_coverage.20121211.bam		NA19043.mapped.ILLUMINA.bwa.LWK.low_coverage.20121211.bam
8315	NA18630.mapped.ILLUMINA.bwa.CHB.low_coverage.20120522.bam	NA18630	1	ALL	BAM	0.00734	0.00755	1252142	3.01	0.5059	0.00123	0.50439	0.00153	3.015	0.9958	CHB.omni_wg_2141_filtered.vcf.gz	PASS	2013-05-16 19:27:05	/nfs/1000g-archive/vol1/ftp/data/NA18630/alignment/NA18630.mapped.ILLUMINA.bwa.CHB.low_coverage.20120522.bam		NA18630.mapped.ILLUMINA.bwa.CHB.low_coverage.20120522.bam
9323	NA18874.mapped.ILLUMINA.bwa.YRI.low_coverage.20120522.bam	NA18874	1	ALL	BAM	0.00733	0.00769	1559108	6.08	0.50459	0.00062	0.5049	0.00063	6.084	1.0012	YRI.omni_wg_2141_filtered.vcf.gz	PASS	2013-05-16 11:20:22	/nfs/1000g-archive/vol1/ftp/data/NA18874/alignment/NA18874.mapped.ILLUMINA.bwa.YRI.low_coverage.20120522.bam		NA18874.mapped.ILLUMINA.bwa.YRI.low_coverage.20120522.bam
12289	NA20853.mapped.ILLUMINA.bwa.GIH.low_coverage.20120522.bam	NA20853	1	ALL	BAM	0.00724	0	887456	5.95	0.50308	0.00032	0	0	0	0	ALL.wgs.coriell_phase3_samples.20121126.snps.affy_6.genotypes.vcf.gz	PASS	2013-05-16 12:38:01	/nfs/1000g-archive/vol1/ftp/data/NA20853/alignment/NA20853.mapped.ILLUMINA.bwa.GIH.low_coverage.20120522.bam		NA20853.mapped.ILLUMINA.bwa.GIH.low_coverage.20120522.bam
9993	NA19707.mapped.ILLUMINA.bwa.ASW.low_coverage.20120522.bam	NA19707	1	ALL	BAM	0.0072	0.00738	1675632	8.53	0.50328	0.00024	0.50391	0.00028	8.578	0.991	ASW.omni_wg_2141_filtered.vcf.gz	PASS	2013-05-17 01:08:54	/nfs/1000g-archive/vol1/ftp/data/NA19707/alignment/NA19707.mapped.ILLUMINA.bwa.ASW.low_coverage.20120522.bam		NA19707.mapped.ILLUMINA.bwa.ASW.low_coverage.20120522.bam
44537	NA20774.mapped.ILLUMINA.bwa.TSI.low_coverage.20130415.bam	NA20774	1	ALL	BAM	0.00719	0.00723	1402149	5.75	0.50122	0.00032	0.50175	0.00034	5.753	0.9991	TSI.omni_wg_2141_filtered.vcf.gz	PASS	2013-05-10 12:34:31	/nfs/1000g-archive/vol1/ftp/data/NA20774/alignment/NA20774.mapped.ILLUMINA.bwa.TSI.low_coverage.20130415.bam		NA20774.mapped.ILLUMINA.bwa.TSI.low_coverage.20130415.bam
40108	NA20759.mapped.ILLUMINA.bwa.TSI.low_coverage.20130422.bam	NA20759	1	ALL	BAM	0.00717	0	887456	7.64	0.50285	0.00034	0	0	0	0	ALL.wgs.coriell_phase3_samples.20121126.snps.affy_6.genotypes.vcf.gz	PASS	2013-05-14 00:39:30	/nfs/1000g-archive/vol1/ftp/data/NA20759/alignment/NA20759.mapped.ILLUMINA.bwa.TSI.low_coverage.20130422.bam		NA20759.mapped.ILLUMINA.bwa.TSI.low_coverage.20130422.bam
25707	HG04302.mapped.ILLUMINA.bwa.GBR.low_coverage.20130415.bam	HG04302	0	ALL	BAM	0.00713	0.00139	591525	4.3	0.50279	0.00032	0.52271	0.00036	4.248	1.0349	GBR.wgs.coriell_phase3_samples.20121126.snps.affy_6.genotypes.vcf.gz	PASS	2013-05-05 06:18:01	/nfs/1000g-archive/vol1/ftp/data/HG04302/alignment/HG04302.mapped.ILLUMINA.bwa.GBR.low_coverage.20130415.bam		HG04302.mapped.ILLUMINA.bwa.GBR.low_coverage.20130415.bam
10517	HG00159.mapped.ILLUMINA.bwa.GBR.low_coverage.20120522.bam	HG00159	1	ALL	BAM	0.00712	0.00763	1389642	4.16	0.50222	0.00058	0.50131	0.0006	4.168	0.9998	GBR.omni_wg_2141_filtered.vcf.gz	PASS	2013-05-17 04:17:18	/nfs/1000g-archive/vol1/ftp/data/HG00159/alignment/HG00159.mapped.ILLUMINA.bwa.GBR.low_coverage.20120522.bam		HG00159.mapped.ILLUMINA.bwa.GBR.low_coverage.20120522.bam
13119	NA12044.mapped.ILLUMINA.bwa.CEU.low_coverage.20121211.bam	NA12044	1	ALL	BAM	0.00712	0	887456	12.45	0.50075	0.00045	0	0	0	0	ALL.wgs.coriell_phase3_samples.20121126.snps.affy_6.genotypes.vcf.gz	PASS	2013-05-16 18:51:06	/nfs/1000g-archive/vol1/ftp/data/NA12044/alignment/NA12044.mapped.ILLUMINA.bwa.CEU.low_coverage.20121211.bam		NA12044.mapped.ILLUMINA.bwa.CEU.low_coverage.20121211.bam
49166	NA12348.mapped.ILLUMINA.bwa.CEU.low_coverage.20130415.bam	NA12348	1	ALL	BAM	0.00708	0	887456	7.92	0.50246	0.00034	0	0	0	0	ALL.wgs.coriell_phase3_samples.20121126.snps.affy_6.genotypes.vcf.gz	PASS	2013-05-10 20:36:21	/nfs/1000g-archive/vol1/ftp/data/NA12348/alignment/NA12348.mapped.ILLUMINA.bwa.CEU.low_coverage.20130415.bam		NA12348.mapped.ILLUMINA.bwa.CEU.low_coverage.20130415.bam
61125	HG00593.mapped.ILLUMINA.bwa.CHS.low_coverage.20130415.bam	HG00593	1	ALL	BAM	0.00705	0.00709	1243376	7.79	0.50206	0.00089	0.50237	0.00099	7.799	0.9982	CHS.omni_wg_2141_filtered.vcf.gz	PASS	2013-05-14 04:43:42	/nfs/1000g-archive/vol1/ftp/data/HG00593/alignment/HG00593.mapped.ILLUMINA.bwa.CHS.low_coverage.20130415.bam		HG00593.mapped.ILLUMINA.bwa.CHS.low_coverage.20130415.bam
12221	NA11832.mapped.ILLUMINA.bwa.CEU.low_coverage.20120522.bam	NA11832	1	ALL	BAM	0.00698	0	887456	14.82	0.50191	0.00019	0	0	0	0	ALL.wgs.coriell_phase3_samples.20121126.snps.affy_6.genotypes.vcf.gz	PASS	2013-05-16 16:00:38	/nfs/1000g-archive/vol1/ftp/data/NA11832/alignment/NA11832.mapped.ILLUMINA.bwa.CEU.low_coverage.20120522.bam		NA11832.mapped.ILLUMINA.bwa.CEU.low_coverage.20120522.bam
13043	HG02819.mapped.ILLUMINA.bwa.GWD.low_coverage.20121211.bam	HG02819	1	ALL	BAM	0.00696	0.00894	840560	4.83	0.50121	0.00042	0.5011	0.00051	4.812	1.0229	GWD.wgs.coriell_phase3_samples.20121126.snps.affy_6.genotypes.vcf.gz	PASS	2013-05-16 18:02:19	/nfs/1000g-archive/vol1/ftp/data/HG02819/alignment/HG02819.mapped.ILLUMINA.bwa.GWD.low_coverage.20121211.bam		HG02819.mapped.ILLUMINA.bwa.GWD.low_coverage.20121211.bam
42750	NA20778.mapped.ILLUMINA.bwa.TSI.low_coverage.20130415.bam	NA20778	1	ALL	BAM	0.00696	0.00703	1402149	8.27	0.50108	0.00031	0.50196	0.00035	8.272	1.0009	TSI.omni_wg_2141_filtered.vcf.gz	PASS	2013-05-10 11:13:44	/nfs/1000g-archive/vol1/ftp/data/NA20778/alignment/NA20778.mapped.ILLUMINA.bwa.TSI.low_coverage.20130415.bam		NA20778.mapped.ILLUMINA.bwa.TSI.low_coverage.20130415.bam
28262	NA12546.mapped.ILLUMINA.bwa.CEU.low_coverage.20130415.bam	NA12546	1	ALL	BAM	0.00694	0.00688	1400785	8.31	0.50143	0.00045	0.50199	0.00035	8.321	0.9992	CEU.omni_wg_2141_filtered.vcf.gz	PASS	2013-05-05 11:33:21	/nfs/1000g-archive/vol1/ftp/data/NA12546/alignment/NA12546.mapped.ILLUMINA.bwa.CEU.low_coverage.20130415.bam		NA12546.mapped.ILLUMINA.bwa.CEU.low_coverage.20130415.bam
8529	HG02360.mapped.ILLUMINA.bwa.CDX.low_coverage.20120522.bam	HG02360	1	ALL	BAM	0.00692	0	665690	6.87	0.50218	0.00068	0	0	0	0	CDX.wgs.coriell_phase3_samples.20121126.snps.affy_6.genotypes.vcf.gz	PASS	2013-05-16 17:04:07	/nfs/1000g-archive/vol1/ftp/data/HG02360/alignment/HG02360.mapped.ILLUMINA.bwa.CDX.low_coverage.20120522.bam		HG02360.mapped.ILLUMINA.bwa.CDX.low_coverage.20120522.bam
43300	HG03775.mapped.ILLUMINA.bwa.ITU.low_coverage.20130415.bam	HG03775	1	ALL	BAM	0.0069	0.00734	781365	10.43	0.50062	0.00037	0.50085	0.00039	10.396	1.0219	ITU.wgs.coriell_phase3_samples.20121126.snps.affy_6.genotypes.vcf.gz	PASS	2013-05-10 11:34:45	/nfs/1000g-archive/vol1/ftp/data/HG03775/alignment/HG03775.mapped.ILLUMINA.bwa.ITU.low_coverage.20130415.bam		HG03775.mapped.ILLUMINA.bwa.ITU.low_coverage.20130415.bam
10593	NA19701.mapped.ILLUMINA.bwa.ASW.low_coverage.20120522.bam	NA19701	1	ALL	BAM	0.00687	0.00731	1675632	5.68	0.50216	0.00034	0.50253	0.00027	5.701	0.995	ASW.omni_wg_2141_filtered.vcf.gz	PASS	2013-05-17 11:35:02	/nfs/1000g-archive/vol1/ftp/data/NA19701/alignment/NA19701.mapped.ILLUMINA.bwa.ASW.low_coverage.20120522.bam		NA19701.mapped.ILLUMINA.bwa.ASW.low_coverage.20120522.bam
55929	NA07037.mapped.ILLUMINA.bwa.CEU.low_coverage.20130502.bam	NA07037	1	ALL	BAM	0.00686	0.00687	1400785	8.05	0.50094	0.00054	0.50192	0.00026	8.067	0.9979	CEU.omni_wg_2141_filtered.vcf.gz	PASS	2013-05-14 00:17:57	/nfs/1000g-archive/vol1/ftp/data/NA07037/alignment/NA07037.mapped.ILLUMINA.bwa.CEU.low_coverage.20130502.bam		NA07037.mapped.ILLUMINA.bwa.CEU.low_coverage.20130502.bam
11197	HG02455.mapped.ILLUMINA.bwa.ACB.low_coverage.20121211.bam	HG02455	1	ALL	BAM	0.00682	0	1597764	6.51	0.50163	0.00053	0	0	0	0	ACB.omni_wg_2141_filtered.vcf.gz	PASS	2013-05-16 21:41:30	/nfs/1000g-archive/vol1/ftp/data/HG02455/alignment/HG02455.mapped.ILLUMINA.bwa.ACB.low_coverage.20121211.bam		HG02455.mapped.ILLUMINA.bwa.ACB.low_coverage.20121211.bam
15694	HG00457.mapped.ILLUMINA.bwa.CHS.low_coverage.20130415.bam	HG00457	1	ALL	BAM	0.0068	0	662328	7.48	0.5002	0.00026	0	0	0	0	CHS.wgs.coriell_phase3_samples.20121126.snps.affy_6.genotypes.vcf.gz	PASS	2013-04-30 18:00:02	/nfs/1000g-archive/vol1/ftp/data/HG00457/alignment/HG00457.mapped.ILLUMINA.bwa.CHS.low_coverage.20130415.bam		HG00457.mapped.ILLUMINA.bwa.CHS.low_coverage.20130415.bam
12563	NA12006.mapped.ILLUMINA.bwa.CEU.low_coverage.20121211.bam	NA12006	1	ALL	BAM	0.0068	0	887456	11.33	0.50172	0.00036	0	0	0	0	ALL.wgs.coriell_phase3_samples.20121126.snps.affy_6.genotypes.vcf.gz	PASS	2013-05-16 19:34:20	/nfs/1000g-archive/vol1/ftp/data/NA12006/alignment/NA12006.mapped.ILLUMINA.bwa.CEU.low_coverage.20121211.bam		NA12006.mapped.ILLUMINA.bwa.CEU.low_coverage.20121211.bam
13174	HG02658.mapped.ILLUMINA.bwa.PJL.low_coverage.20121211.bam	HG02658	1	ALL	BAM	0.00676	0.00811	781539	9.5	0.50139	0.0005	0.50122	0.00053	9.52	0.9987	PJL.wgs.coriell_phase3_samples.20121126.snps.affy_6.genotypes.vcf.gz	PASS	2013-05-16 14:39:44	/nfs/1000g-archive/vol1/ftp/data/HG02658/alignment/HG02658.mapped.ILLUMINA.bwa.PJL.low_coverage.20121211.bam		HG02658.mapped.ILLUMINA.bwa.PJL.low_coverage.20121211.bam
16338	HG01064.mapped.ILLUMINA.bwa.PUR.low_coverage.20130415.bam	HG01064	1	ALL	BAM	0.00672	0.00611	854341	4.27	0.50105	0.00054	0.50157	0.00029	4.28	1.0008	PUR.wgs.coriell_phase3_samples.20121126.snps.affy_6.genotypes.vcf.gz	PASS	2013-04-30 18:55:51	/nfs/1000g-archive/vol1/ftp/data/HG01064/alignment/HG01064.mapped.ILLUMINA.bwa.PUR.low_coverage.20130415.bam		HG01064.mapped.ILLUMINA.bwa.PUR.low_coverage.20130415.bam
33172	NA18942.mapped.ILLUMINA.bwa.JPT.low_coverage.20130415.bam	NA18942	1	ALL	BAM	0.00671	0	887456	6.93	0.49979	0.00015	0	0	0	0	ALL.wgs.coriell_phase3_samples.20121126.snps.affy_6.genotypes.vcf.gz	PASS	2013-05-08 03:16:14	/nfs/1000g-archive/vol1/ftp/data/NA18942/alignment/NA18942.mapped.ILLUMINA.bwa.JPT.low_coverage.20130415.bam		NA18942.mapped.ILLUMINA.bwa.JPT.low_coverage.20130415.bam
9264	NA19055.mapped.ILLUMINA.bwa.JPT.low_coverage.20120522.bam	NA19055	1	ALL	BAM	0.00665	0.00637	1243522	5.74	0.50775	0.00152	0.50826	0.00166	5.788	0.9912	JPT.omni_wg_2141_filtered.vcf.gz	PASS	2013-05-17 11:09:36	/nfs/1000g-archive/vol1/ftp/data/NA19055/alignment/NA19055.mapped.ILLUMINA.bwa.JPT.low_coverage.20120522.bam		NA19055.mapped.ILLUMINA.bwa.JPT.low_coverage.20120522.bam
16782	HG02348.mapped.ILLUMINA.bwa.PEL.low_coverage.20130415.bam	HG02348	1	ALL	BAM	0.00662	0.00642	779795	7.65	0.50035	0.00023	0.5004	0.00036	7.668	0.9975	PEL.wgs.coriell_phase3_samples.20121126.snps.affy_6.genotypes.vcf.gz	PASS	2013-04-30 19:26:42	/nfs/1000g-archive/vol1/ftp/data/HG02348/alignment/HG02348.mapped.ILLUMINA.bwa.PEL.low_coverage.20130415.bam		HG02348.mapped.ILLUMINA.bwa.PEL.low_coverage.20130415.bam
12704	HG03931.mapped.ILLUMINA.bwa.BEB.low_coverage.20121211.bam	HG03931	1	ALL	BAM	0.0066	0.00658	783628	6.2	0.50049	5e-05	0.50037	0.0001	6.213	0.9983	BEB.wgs.coriell_phase3_samples.20121126.snps.affy_6.genotypes.vcf.gz	PASS	2013-05-16 10:04:04	/nfs/1000g-archive/vol1/ftp/data/HG03931/alignment/HG03931.mapped.ILLUMINA.bwa.BEB.low_coverage.20121211.bam		HG03931.mapped.ILLUMINA.bwa.BEB.low_coverage.20121211.bam
8489	NA19455.mapped.ILLUMINA.bwa.LWK.low_coverage.20120522.bam	NA19455	1	ALL	BAM	0.00656	0.00774	1570264	5.99	0.50246	0.00035	0.50295	0.00041	5.99	1.0015	LWK.omni_wg_2141_filtered.vcf.gz	PASS	2013-05-17 02:53:16	/nfs/1000g-archive/vol1/ftp/data/NA19455/alignment/NA19455.mapped.ILLUMINA.bwa.LWK.low_coverage.20120522.bam		NA19455.mapped.ILLUMINA.bwa.LWK.low_coverage.20120522.bam
8186	NA19067.mapped.ILLUMINA.bwa.JPT.low_coverage.20120522.bam	NA19067	1	ALL	BAM	0.00656	0.0067	1243522	5.77	0.50261	0.00089	0.50364	0.00117	5.785	1.0002	JPT.omni_wg_2141_filtered.vcf.gz	PASS	2013-05-17 11:59:37	/nfs/1000g-archive/vol1/ftp/data/NA19067/alignment/NA19067.mapped.ILLUMINA.bwa.JPT.low_coverage.20120522.bam		NA19067.mapped.ILLUMINA.bwa.JPT.low_coverage.20120522.bam
46256	HG03775.mapped.ILLUMINA.bwa.ITU.low_coverage.20130415.bam	HG03775	1	ALL	BAM	0.00652	0	1753219	10.34	0.50053	0.00019	0	0	0	0	ALL.omni_wg_2141_filtered.vcf.gz	PASS	2013-05-10 13:42:05	/nfs/1000g-archive/vol1/ftp/data/HG03775/alignment/HG03775.mapped.ILLUMINA.bwa.ITU.low_coverage.20130415.bam		HG03775.mapped.ILLUMINA.bwa.ITU.low_coverage.20130415.bam
42539	NA20805.mapped.ILLUMINA.bwa.TSI.low_coverage.20130415.bam	NA20805	1	ALL	BAM	0.00651	0.00656	1402149	7.61	0.50156	0.00029	0.50243	0.00037	7.609	1.0021	TSI.omni_wg_2141_filtered.vcf.gz	PASS	2013-05-10 11:06:20	/nfs/1000g-archive/vol1/ftp/data/NA20805/alignment/NA20805.mapped.ILLUMINA.bwa.TSI.low_coverage.20130415.bam		NA20805.mapped.ILLUMINA.bwa.TSI.low_coverage.20130415.bam
12192	HG02658.mapped.ILLUMINA.bwa.PJL.low_coverage.20121211.bam	HG02658	1	ALL	BAM	0.0065	0	1753219	9.26	0.50112	0.00031	0	0	0	0	ALL.omni_wg_2141_filtered.vcf.gz	PASS	2013-05-17 16:28:05	/nfs/1000g-archive/vol1/ftp/data/HG02658/alignment/HG02658.mapped.ILLUMINA.bwa.PJL.low_coverage.20121211.bam		HG02658.mapped.ILLUMINA.bwa.PJL.low_coverage.20121211.bam
56041	HG00593.mapped.ILLUMINA.bwa.CHS.low_coverage.20130415.bam	HG00593	1	ALL	BAM	0.00645	0	662328	7.91	0.5002	0.00073	0	0	0	0	CHS.wgs.coriell_phase3_samples.20121126.snps.affy_6.genotypes.vcf.gz	PASS	2013-05-14 00:26:18	/nfs/1000g-archive/vol1/ftp/data/HG00593/alignment/HG00593.mapped.ILLUMINA.bwa.CHS.low_coverage.20130415.bam		HG00593.mapped.ILLUMINA.bwa.CHS.low_coverage.20130415.bam
8629	HG00190.mapped.ILLUMINA.bwa.FIN.low_coverage.20120522.bam	HG00190	1	ALL	BAM	0.00644	0.00504	1385013	3.03	0.50371	0.00066	0.50389	0.00063	3.031	0.9995	FIN.omni_wg_2141_filtered.vcf.gz	PASS	2013-05-16 21:22:24	/nfs/1000g-archive/vol1/ftp/data/HG00190/alignment/HG00190.mapped.ILLUMINA.bwa.FIN.low_coverage.20120522.bam		HG00190.mapped.ILLUMINA.bwa.FIN.low_coverage.20120522.bam
56867	HG03882.mapped.ILLUMINA.bwa.ITU.low_coverage.20130422.bam	HG03882	1	ALL	BAM	0.00643	0.00623	781365	8.87	0.5013	0.00017	0.50133	0.00024	8.889	0.9978	ITU.wgs.coriell_phase3_samples.20121126.snps.affy_6.genotypes.vcf.gz	PASS	2013-05-14 01:54:24	/nfs/1000g-archive/vol1/ftp/data/HG03882/alignment/HG03882.mapped.ILLUMINA.bwa.ITU.low_coverage.20130422.bam		HG03882.mapped.ILLUMINA.bwa.ITU.low_coverage.20130422.bam
60774	NA19030.mapped.ILLUMINA.bwa.LWK.low_coverage.20130415.bam	NA19030	1	ALL	BAM	0.00639	0	1570264	7.7	0.50188	0.00092	0	0	0	0	LWK.omni_wg_2141_filtered.vcf.gz	PASS	2013-05-14 04:33:57	/nfs/1000g-archive/vol1/ftp/data/NA19030/alignment/NA19030.mapped.ILLUMINA.bwa.LWK.low_coverage.20130415.bam		NA19030.mapped.ILLUMINA.bwa.LWK.low_coverage.20130415.bam
13105	HG02885.mapped.ILLUMINA.bwa.GWD.low_coverage.20121211.bam	HG02885	1	ALL	BAM	0.00638	0.00692	840560	6.96	0.50066	0.00027	0.5012	0.00014	6.962	1.0017	GWD.wgs.coriell_phase3_samples.20121126.snps.affy_6.genotypes.vcf.gz	PASS	2013-05-16 10:21:19	/nfs/1000g-archive/vol1/ftp/data/HG02885/alignment/HG02885.mapped.ILLUMINA.bwa.GWD.low_coverage.20121211.bam		HG02885.mapped.ILLUMINA.bwa.GWD.low_coverage.20121211.bam
16882	HG02348.mapped.ILLUMINA.bwa.PEL.low_coverage.20130415.bam	HG02348	1	ALL	BAM	0.00638	0	1304517	7.37	0.50166	0.00055	0	0	0	0	PEL.omni_wg_2141_filtered.vcf.gz	PASS	2013-04-30 19:38:37	/nfs/1000g-archive/vol1/ftp/data/HG02348/alignment/HG02348.mapped.ILLUMINA.bwa.PEL.low_coverage.20130415.bam		HG02348.mapped.ILLUMINA.bwa.PEL.low_coverage.20130415.bam
27848	HG03986.mapped.ILLUMINA.bwa.STU.low_coverage.20130415.bam	HG03986	1	ALL	BAM	0.00633	0.00602	779732	9.06	0.49993	0.00013	0.50133	0.00015	9.071	0.9991	STU.wgs.coriell_phase3_samples.20121126.snps.affy_6.genotypes.vcf.gz	PASS	2013-05-05 11:01:18	/nfs/1000g-archive/vol1/ftp/data/HG03986/alignment/HG03986.mapped.ILLUMINA.bwa.STU.low_coverage.20130415.bam		HG03986.mapped.ILLUMINA.bwa.STU.low_coverage.20130415.bam
26896	HG04195.mapped.ILLUMINA.bwa.BEB.low_coverage.20130415.bam	HG04195	1	ALL	BAM	0.00631	0	1753219	7.54	0.50042	0.00017	0	0	0	0	ALL.omni_wg_2141_filtered.vcf.gz	PASS	2013-05-05 08:29:53	/nfs/1000g-archive/vol1/ftp/data/HG04195/alignment/HG04195.mapped.ILLUMINA.bwa.BEB.low_coverage.20130415.bam		HG04195.mapped.ILLUMINA.bwa.BEB.low_coverage.20130415.bam
13109	HG02586.mapped.ILLUMINA.bwa.GWD.low_coverage.20121211.bam	HG02586	1	ALL	BAM	0.00627	0.00629	840560	10.92	0.50161	0.00036	0.50154	0.00036	10.952	0.9964	GWD.wgs.coriell_phase3_samples.20121126.snps.affy_6.genotypes.vcf.gz	PASS	2013-05-16 15:37:27	/nfs/1000g-archive/vol1/ftp/data/HG02586/alignment/HG02586.mapped.ILLUMINA.bwa.GWD.low_coverage.20121211.bam		HG02586.mapped.ILLUMINA.bwa.GWD.low_coverage.20121211.bam
45004	HG00368.mapped.ILLUMINA.bwa.FIN.low_coverage.20130415.bam	HG00368	1	ALL	BAM	0.00626	0.00605	1385013	6.58	0.50206	0.00039	0.50256	0.00045	6.587	1.0009	FIN.omni_wg_2141_filtered.vcf.gz	PASS	2013-05-10 13:01:50	/nfs/1000g-archive/vol1/ftp/data/HG00368/alignment/HG00368.mapped.ILLUMINA.bwa.FIN.low_coverage.20130415.bam		HG00368.mapped.ILLUMINA.bwa.FIN.low_coverage.20130415.bam
12774	NA19043.mapped.ILLUMINA.bwa.LWK.low_coverage.20121211.bam	NA19043	1	ALL	BAM	0.00626	0	887456	8.02	0.49958	0.00011	0	0	0	0	ALL.wgs.coriell_phase3_samples.20121126.snps.affy_6.genotypes.vcf.gz	PASS	2013-05-16 15:59:04	/nfs/1000g-archive/vol1/ftp/data/NA19043/alignment/NA19043.mapped.ILLUMINA.bwa.LWK.low_coverage.20121211.bam		NA19043.mapped.ILLUMINA.bwa.LWK.low_coverage.20121211.bam
12571	HG03479.mapped.ILLUMINA.bwa.MSL.low_coverage.20121211.bam	HG03479	1	ALL	BAM	0.00623	0	1753219	7.98	0.49901	0.00042	0	0	0	0	ALL.omni_wg_2141_filtered.vcf.gz	PASS	2013-05-16 15:45:03	/nfs/1000g-archive/vol1/ftp/data/HG03479/alignment/HG03479.mapped.ILLUMINA.bwa.MSL.low_coverage.20121211.bam		HG03479.mapped.ILLUMINA.bwa.MSL.low_coverage.20121211.bam
7945	HG00119.mapped.ILLUMINA.bwa.GBR.low_coverage.20120522.bam	HG00119	1	ALL	BAM	0.00619	0.00662	1389642	4.93	0.50229	0.00033	0.50244	0.00043	4.934	1	GBR.omni_wg_2141_filtered.vcf.gz	PASS	2013-05-17 09:00:24	/nfs/1000g-archive/vol1/ftp/data/HG00119/alignment/HG00119.mapped.ILLUMINA.bwa.GBR.low_coverage.20120522.bam		HG00119.mapped.ILLUMINA.bwa.GBR.low_coverage.20120522.bam
62010	HG00178.mapped.ILLUMINA.bwa.FIN.low_coverage.20130415.bam	HG00178	1	ALL	BAM	0.00615	0.00621	1385013	8.08	0.501	0.00046	0.50229	0.00035	8.093	0.998	FIN.omni_wg_2141_filtered.vcf.gz	PASS	2013-05-14 05:19:17	/nfs/1000g-archive/vol1/ftp/data/HG00178/alignment/HG00178.mapped.ILLUMINA.bwa.FIN.low_coverage.20130415.bam		HG00178.mapped.ILLUMINA.bwa.FIN.low_coverage.20130415.bam
12096	HG04149.mapped.ILLUMINA.bwa.BEB.low_coverage.20121211.bam	HG04149	0	ALL	BAM	0.00607	0	1753219	6.24	0.50159	0.0001	0	0	0	0	ALL.omni_wg_2141_filtered.vcf.gz	PASS	2013-05-16 13:42:40	/nfs/1000g-archive/vol1/ftp/data/HG04149/alignment/HG04149.mapped.ILLUMINA.bwa.BEB.low_coverage.20121211.bam		HG04149.mapped.ILLUMINA.bwa.BEB.low_coverage.20121211.bam
10225	NA19678.mapped.ILLUMINA.bwa.MXL.low_coverage.20120522.bam	NA19678	1	ALL	BAM	0.00607	0	671518	9.82	0.50364	0.00162	0	0	0	0	MXL.wgs.coriell_phase3_samples.20121126.snps.affy_6.genotypes.vcf.gz	PASS	2013-05-16 18:34:17	/nfs/1000g-archive/vol1/ftp/data/NA19678/alignment/NA19678.mapped.ILLUMINA.bwa.MXL.low_coverage.20120522.bam		NA19678.mapped.ILLUMINA.bwa.MXL.low_coverage.20120522.bam
12710	NA19350.mapped.ILLUMINA.bwa.LWK.low_coverage.20120522.bam	NA19350	1	ALL	BAM	0.00606	0	887456	7.08	0.50025	0.00019	0	0	0	0	ALL.wgs.coriell_phase3_samples.20121126.snps.affy_6.genotypes.vcf.gz	PASS	2013-05-16 08:46:29	/nfs/1000g-archive/vol1/ftp/data/NA19350/alignment/NA19350.mapped.ILLUMINA.bwa.LWK.low_coverage.20120522.bam		NA19350.mapped.ILLUMINA.bwa.LWK.low_coverage.20120522.bam
58672	HG02768.mapped.ILLUMINA.bwa.GWD.low_coverage.20130415.bam	HG02768	1	ALL	BAM	0.00602	0.00653	840560	9.77	0.50023	0.00033	0.50115	0.00032	9.752	1.0212	GWD.wgs.coriell_phase3_samples.20121126.snps.affy_6.genotypes.vcf.gz	PASS	2013-05-14 03:03:52	/nfs/1000g-archive/vol1/ftp/data/HG02768/alignment/HG02768.mapped.ILLUMINA.bwa.GWD.low_coverage.20130415.bam		HG02768.mapped.ILLUMINA.bwa.GWD.low_coverage.20130415.bam
11832	HG02613.mapped.ILLUMINA.bwa.GWD.low_coverage.20121211.bam	HG02613	1	ALL	BAM	0.00602	0	1753219	8.32	0.50017	0.00041	0	0	0	0	ALL.omni_wg_2141_filtered.vcf.gz	PASS	2013-05-16 19:56:43	/nfs/1000g-archive/vol1/ftp/data/HG02613/alignment/HG02613.mapped.ILLUMINA.bwa.GWD.low_coverage.20121211.bam		HG02613.mapped.ILLUMINA.bwa.GWD.low_coverage.20121211.bam
7814	NA18986.mapped.ILLUMINA.bwa.JPT.low_coverage.20120522.bam	NA18986	1	ALL	BAM	0.00594	0.00577	1243522	11.12	0.51132	0.00091	0.51212	0.00101	11.284	0.9804	JPT.omni_wg_2141_filtered.vcf.gz	PASS	2013-05-17 07:21:41	/nfs/1000g-archive/vol1/ftp/data/NA18986/alignment/NA18986.mapped.ILLUMINA.bwa.JPT.low_coverage.20120522.bam		NA18986.mapped.ILLUMINA.bwa.JPT.low_coverage.20120522.bam
60050	NA12045.mapped.ILLUMINA.bwa.CEU.low_coverage.20130415.bam	NA12045	1	ALL	BAM	0.00593	0.00596	1400785	10.64	0.50164	0.00046	0.50221	0.00053	10.661	0.9972	CEU.omni_wg_2141_filtered.vcf.gz	PASS	2013-05-14 04:02:17	/nfs/1000g-archive/vol1/ftp/data/NA12045/alignment/NA12045.mapped.ILLUMINA.bwa.CEU.low_coverage.20130415.bam		NA12045.mapped.ILLUMINA.bwa.CEU.low_coverage.20130415.bam
9747	HG01948.mapped.ILLUMINA.bwa.PEL.low_coverage.20120522.bam	HG01948	1	ALL	BAM	0.00589	0.00424	1304517	5.78	0.50269	0.00138	0.50235	0.00069	5.792	0.9978	PEL.omni_wg_2141_filtered.vcf.gz	PASS	2013-05-16 19:41:58	/nfs/1000g-archive/vol1/ftp/data/HG01948/alignment/HG01948.mapped.ILLUMINA.bwa.PEL.low_coverage.20120522.bam		HG01948.mapped.ILLUMINA.bwa.PEL.low_coverage.20120522.bam
10543	NA19904.mapped.ILLUMINA.bwa.ASW.low_coverage.20120522.bam	NA19904	1	ALL	BAM	0.00586	0.00641	1675632	8	0.5032	0.00028	0.50364	0.00043	8.04	0.9923	ASW.omni_wg_2141_filtered.vcf.gz	PASS	2013-05-16 22:10:08	/nfs/1000g-archive/vol1/ftp/data/NA19904/alignment/NA19904.mapped.ILLUMINA.bwa.ASW.low_coverage.20120522.bam		NA19904.mapped.ILLUMINA.bwa.ASW.low_coverage.20120522.bam
8158	HG01107.mapped.ILLUMINA.bwa.PUR.low_coverage.20120522.bam	HG01107	1	ALL	BAM	0.00583	0	854341	5.11	0.50095	0.00078	0	0	0	0	PUR.wgs.coriell_phase3_samples.20121126.snps.affy_6.genotypes.vcf.gz	PASS	2013-05-16 12:34:27	/nfs/1000g-archive/vol1/ftp/data/HG01107/alignment/HG01107.mapped.ILLUMINA.bwa.PUR.low_coverage.20120522.bam		HG01107.mapped.ILLUMINA.bwa.PUR.low_coverage.20120522.bam
44163	HG03978.mapped.ILLUMINA.bwa.ITU.low_coverage.20130415.bam	HG03978	1	ALL	BAM	0.00579	0.00639	781365	9.53	0.50101	0.00015	0.50098	0.00015	9.506	1.0207	ITU.wgs.coriell_phase3_samples.20121126.snps.affy_6.genotypes.vcf.gz	PASS	2013-05-10 12:01:42	/nfs/1000g-archive/vol1/ftp/data/HG03978/alignment/HG03978.mapped.ILLUMINA.bwa.ITU.low_coverage.20130415.bam		HG03978.mapped.ILLUMINA.bwa.ITU.low_coverage.20130415.bam
34931	NA18956.mapped.ILLUMINA.bwa.JPT.low_coverage.20130415.bam	NA18956	1	ALL	BAM	0.00577	0.00522	1243522	5.33	0.50316	0.00088	0.50337	0.00092	5.34	0.9996	JPT.omni_wg_2141_filtered.vcf.gz	PASS	2013-05-08 06:50:37	/nfs/1000g-archive/vol1/ftp/data/NA18956/alignment/NA18956.mapped.ILLUMINA.bwa.JPT.low_coverage.20130415.bam		NA18956.mapped.ILLUMINA.bwa.JPT.low_coverage.20130415.bam
20314	HG02778.mapped.ILLUMINA.bwa.PJL.low_coverage.20130415.bam	HG02778	1	ALL	BAM	0.00576	0.00677	781539	4.7	0.49952	5e-05	0.50095	0.00016	4.704	0.9998	PJL.wgs.coriell_phase3_samples.20121126.snps.affy_6.genotypes.vcf.gz	PASS	2013-05-03 05:05:03	/nfs/1000g-archive/vol1/ftp/data/HG02778/alignment/HG02778.mapped.ILLUMINA.bwa.PJL.low_coverage.20130415.bam		HG02778.mapped.ILLUMINA.bwa.PJL.low_coverage.20130415.bam
57656	HG03464.mapped.ILLUMINA.bwa.MSL.low_coverage.20130415.bam	HG03464	1	ALL	BAM	0.00576	0.00604	838168	9.32	0.50213	0.00019	0.50193	0.00018	9.354	0.9964	MSL.wgs.coriell_phase3_samples.20121126.snps.affy_6.genotypes.vcf.gz	PASS	2013-05-14 02:38:56	/nfs/1000g-archive/vol1/ftp/data/HG03464/alignment/HG03464.mapped.ILLUMINA.bwa.MSL.low_coverage.20130415.bam		HG03464.mapped.ILLUMINA.bwa.MSL.low_coverage.20130415.bam
16428	HG01269.mapped.ILLUMINA.bwa.CLM.low_coverage.20130415.bam	HG01269	1	ALL	BAM	0.00575	0.0058	832763	6.7	0.50082	2e-05	0.50047	3e-05	6.706	0.9984	CLM.wgs.coriell_phase3_samples.20121126.snps.affy_6.genotypes.vcf.gz	PASS	2013-04-30 19:01:41	/nfs/1000g-archive/vol1/ftp/data/HG01269/alignment/HG01269.mapped.ILLUMINA.bwa.CLM.low_coverage.20130415.bam		HG01269.mapped.ILLUMINA.bwa.CLM.low_coverage.20130415.bam
40631	HG03796.mapped.ILLUMINA.bwa.BEB.low_coverage.20130415.bam	HG03796	1	ALL	BAM	0.00574	0.00565	783628	11.45	0.50262	0.0005	0.50254	0.00049	11.503	0.9949	BEB.wgs.coriell_phase3_samples.20121126.snps.affy_6.genotypes.vcf.gz	PASS	2013-05-10 09:11:27	/nfs/1000g-archive/vol1/ftp/data/HG03796/alignment/HG03796.mapped.ILLUMINA.bwa.BEB.low_coverage.20130415.bam		HG03796.mapped.ILLUMINA.bwa.BEB.low_coverage.20130415.bam
27647	NA12043.mapped.ILLUMINA.bwa.CEU.low_coverage.20130415.bam	NA12043	1	ALL	BAM	0.00573	0.00598	1400785	5.3	0.50219	0.00038	0.5027	0.00049	5.306	0.999	CEU.omni_wg_2141_filtered.vcf.gz	PASS	2013-05-05 10:51:47	/nfs/1000g-archive/vol1/ftp/data/NA12043/alignment/NA12043.mapped.ILLUMINA.bwa.CEU.low_coverage.20130415.bam		NA12043.mapped.ILLUMINA.bwa.CEU.low_coverage.20130415.bam
12717	HG02811.mapped.ILLUMINA.bwa.GWD.low_coverage.20121211.bam	HG02811	1	ALL	BAM	0.00573	0.00577	840560	12.76	0.50191	0.00026	0.50291	0.00027	12.811	0.9941	GWD.wgs.coriell_phase3_samples.20121126.snps.affy_6.genotypes.vcf.gz	PASS	2013-05-16 17:28:48	/nfs/1000g-archive/vol1/ftp/data/HG02811/alignment/HG02811.mapped.ILLUMINA.bwa.GWD.low_coverage.20121211.bam		HG02811.mapped.ILLUMINA.bwa.GWD.low_coverage.20121211.bam
8112	NA19625.mapped.ILLUMINA.bwa.ASW.low_coverage.20120522.bam	NA19625	1	ALL	BAM	0.00572	0.00541	1675632	4.56	0.50287	0.00049	0.50261	0.00037	4.56	1.0004	ASW.omni_wg_2141_filtered.vcf.gz	PASS	2013-05-17 03:36:33	/nfs/1000g-archive/vol1/ftp/data/NA19625/alignment/NA19625.mapped.ILLUMINA.bwa.ASW.low_coverage.20120522.bam		NA19625.mapped.ILLUMINA.bwa.ASW.low_coverage.20120522.bam
16092	HG02179.mapped.ILLUMINA.bwa.CDX.low_coverage.20130415.bam	HG02179	1	ALL	BAM	0.00572	0	665690	4.21	0.50683	0.0026	0	0	0	0	CDX.wgs.coriell_phase3_samples.20121126.snps.affy_6.genotypes.vcf.gz	PASS	2013-04-30 18:35:32	/nfs/1000g-archive/vol1/ftp/data/HG02179/alignment/HG02179.mapped.ILLUMINA.bwa.CDX.low_coverage.20130415.bam		HG02179.mapped.ILLUMINA.bwa.CDX.low_coverage.20130415.bam
26030	HG04098.mapped.ILLUMINA.bwa.ITU.low_coverage.20130415.bam	HG04098	1	ALL	BAM	0.00571	0.00627	781365	7.44	0.50101	0.00015	0.50103	2e-05	7.407	1.0213	ITU.wgs.coriell_phase3_samples.20121126.snps.affy_6.genotypes.vcf.gz	PASS	2013-05-05 07:28:41	/nfs/1000g-archive/vol1/ftp/data/HG04098/alignment/HG04098.mapped.ILLUMINA.bwa.ITU.low_coverage.20130415.bam		HG04098.mapped.ILLUMINA.bwa.ITU.low_coverage.20130415.bam
13065	HG03472.mapped.ILLUMINA.bwa.MSL.low_coverage.20121211.bam	HG03472	1	ALL	BAM	0.00569	0.00611	838168	7.25	0.50108	0.0004	0.50102	0.00052	7.232	1.0227	MSL.wgs.coriell_phase3_samples.20121126.snps.affy_6.genotypes.vcf.gz	PASS	2013-05-16 21:09:39	/nfs/1000g-archive/vol1/ftp/data/HG03472/alignment/HG03472.mapped.ILLUMINA.bwa.MSL.low_coverage.20121211.bam		HG03472.mapped.ILLUMINA.bwa.MSL.low_coverage.20121211.bam
40391	HG03887.mapped.ILLUMINA.bwa.STU.low_coverage.20130415.bam	HG03887	1	ALL	BAM	0.00568	0.00626	779732	8.75	0.5024	0.00033	0.50229	0.00026	8.734	1.0191	STU.wgs.coriell_phase3_samples.20121126.snps.affy_6.genotypes.vcf.gz	PASS	2013-05-10 08:43:53	/nfs/1000g-archive/vol1/ftp/data/HG03887/alignment/HG03887.mapped.ILLUMINA.bwa.STU.low_coverage.20130415.bam		HG03887.mapped.ILLUMINA.bwa.STU.low_coverage.20130415.bam
10078	HG02427.mapped.ILLUMINA.bwa.ACB.low_coverage.20120522.bam	HG02427	1	ALL	BAM	0.00568	0.00571	1597764	11.75	0.5009	0.00055	0.5025	0.00069	11.751	1.0024	ACB.omni_wg_2141_filtered.vcf.gz	PASS	2013-05-16 22:34:48	/nfs/1000g-archive/vol1/ftp/data/HG02427/alignment/HG02427.mapped.ILLUMINA.bwa.ACB.low_coverage.20120522.bam		HG02427.mapped.ILLUMINA.bwa.ACB.low_coverage.20120522.bam
40966	NA20770.mapped.ILLUMINA.bwa.TSI.low_coverage.20130415.bam	NA20770	1	ALL	BAM	0.00567	0.00625	1402149	6.69	0.50147	0.00048	0.50179	0.00037	6.695	0.9994	TSI.omni_wg_2141_filtered.vcf.gz	PASS	2013-05-10 09:43:44	/nfs/1000g-archive/vol1/ftp/data/NA20770/alignment/NA20770.mapped.ILLUMINA.bwa.TSI.low_coverage.20130415.bam		NA20770.mapped.ILLUMINA.bwa.TSI.low_coverage.20130415.bam
57551	HG03097.mapped.ILLUMINA.bwa.MSL.low_coverage.20130415.bam	HG03097	1	ALL	BAM	0.00566	0.00554	838168	11.51	0.50198	0.00026	0.50187	0.00025	11.549	0.9963	MSL.wgs.coriell_phase3_samples.20121126.snps.affy_6.genotypes.vcf.gz	PASS	2013-05-14 02:31:46	/nfs/1000g-archive/vol1/ftp/data/HG03097/alignment/HG03097.mapped.ILLUMINA.bwa.MSL.low_coverage.20130415.bam		HG03097.mapped.ILLUMINA.bwa.MSL.low_coverage.20130415.bam
12969	HG02661.mapped.ILLUMINA.bwa.PJL.low_coverage.20121211.bam	HG02661	1	ALL	BAM	0.00563	0.0055	781539	9.72	0.501	0.0003	0.50091	0.00032	9.738	0.9985	PJL.wgs.coriell_phase3_samples.20121126.snps.affy_6.genotypes.vcf.gz	PASS	2013-05-16 21:23:24	/nfs/1000g-archive/vol1/ftp/data/HG02661/alignment/HG02661.mapped.ILLUMINA.bwa.PJL.low_coverage.20121211.bam		HG02661.mapped.ILLUMINA.bwa.PJL.low_coverage.20121211.bam
41989	NA20543.mapped.ILLUMINA.bwa.TSI.low_coverage.20130415.bam	NA20543	1	ALL	BAM	0.00561	0	887456	8.71	0.50127	0.00026	0	0	0	0	ALL.wgs.coriell_phase3_samples.20121126.snps.affy_6.genotypes.vcf.gz	PASS	2013-05-10 10:37:45	/nfs/1000g-archive/vol1/ftp/data/NA20543/alignment/NA20543.mapped.ILLUMINA.bwa.TSI.low_coverage.20130415.bam		NA20543.mapped.ILLUMINA.bwa.TSI.low_coverage.20130415.bam
12595	HG03061.mapped.ILLUMINA.bwa.MSL.low_coverage.20121211.bam	HG03061	1	ALL	BAM	0.0056	0	1753219	3.85	0.49459	0.0025	0	0	0	0	ALL.omni_wg_2141_filtered.vcf.gz	PASS	2013-05-17 05:23:40	/nfs/1000g-archive/vol1/ftp/data/HG03061/alignment/HG03061.mapped.ILLUMINA.bwa.MSL.low_coverage.20121211.bam		HG03061.mapped.ILLUMINA.bwa.MSL.low_coverage.20121211.bam
25833	HG03765.mapped.ILLUMINA.bwa.PJL.low_coverage.20130415.bam	HG03765	1	ALL	BAM	0.00559	0.00509	781539	4.22	0.50219	0.00094	0.50045	0.00075	4.227	0.9986	PJL.wgs.coriell_phase3_samples.20121126.snps.affy_6.genotypes.vcf.gz	PASS	2013-05-05 06:39:49	/nfs/1000g-archive/vol1/ftp/data/HG03765/alignment/HG03765.mapped.ILLUMINA.bwa.PJL.low_coverage.20130415.bam		HG03765.mapped.ILLUMINA.bwa.PJL.low_coverage.20130415.bam
12086	HG02657.mapped.ILLUMINA.bwa.PJL.low_coverage.20121211.bam	HG02657	1	ALL	BAM	0.00558	0.00589	781539	8.02	0.4998	0.00033	0.50039	0.00034	7.989	1.0229	PJL.wgs.coriell_phase3_samples.20121126.snps.affy_6.genotypes.vcf.gz	PASS	2013-05-16 23:56:12	/nfs/1000g-archive/vol1/ftp/data/HG02657/alignment/HG02657.mapped.ILLUMINA.bwa.PJL.low_coverage.20121211.bam		HG02657.mapped.ILLUMINA.bwa.PJL.low_coverage.20121211.bam
58034	HG03397.mapped.ILLUMINA.bwa.MSL.low_coverage.20130415.bam	HG03397	1	ALL	BAM	0.00556	0.00617	838168	9.23	0.50032	0.00032	0.50081	0.00014	9.211	1.0228	MSL.wgs.coriell_phase3_samples.20121126.snps.affy_6.genotypes.vcf.gz	PASS	2013-05-14 02:48:58	/nfs/1000g-archive/vol1/ftp/data/HG03397/alignment/HG03397.mapped.ILLUMINA.bwa.MSL.low_coverage.20130415.bam		HG03397.mapped.ILLUMINA.bwa.MSL.low_coverage.20130415.bam
10527	NA18983.mapped.ILLUMINA.bwa.JPT.low_coverage.20120522.bam	NA18983	1	ALL	BAM	0.00556	0.00575	1243522	8.46	0.50685	0.00063	0.50862	0.00075	8.534	0.9891	JPT.omni_wg_2141_filtered.vcf.gz	PASS	2013-05-17 09:13:11	/nfs/1000g-archive/vol1/ftp/data/NA18983/alignment/NA18983.mapped.ILLUMINA.bwa.JPT.low_coverage.20120522.bam		NA18983.mapped.ILLUMINA.bwa.JPT.low_coverage.20120522.bam
9334	NA20854.mapped.ILLUMINA.bwa.GIH.low_coverage.20120522.bam	NA20854	1	ALL	BAM	0.00556	0.00529	1368816	4.37	0.50213	0.00059	0.50245	0.00059	4.374	0.9991	GIH.omni_wg_2141_filtered.vcf.gz	PASS	2013-05-17 01:03:32	/nfs/1000g-archive/vol1/ftp/data/NA20854/alignment/NA20854.mapped.ILLUMINA.bwa.GIH.low_coverage.20120522.bam		NA20854.mapped.ILLUMINA.bwa.GIH.low_coverage.20120522.bam
59874	HG02922.mapped.ILLUMINA.bwa.ESN.low_coverage.20130415.bam	HG02922	1	ALL	BAM	0.00555	0.00548	835395	9.35	0.50161	0.00062	0.50178	0.00055	9.364	0.9987	ESN.wgs.coriell_phase3_samples.20121126.snps.affy_6.genotypes.vcf.gz	PASS	2013-05-14 03:55:03	/nfs/1000g-archive/vol1/ftp/data/HG02922/alignment/HG02922.mapped.ILLUMINA.bwa.ESN.low_coverage.20130415.bam		HG02922.mapped.ILLUMINA.bwa.ESN.low_coverage.20130415.bam
9191	NA19655.mapped.ILLUMINA.bwa.MXL.low_coverage.20120522.bam	NA19655	1	ALL	BAM	0.0055	0.00556	1437703	4.92	0.50282	0.00078	0.50199	0.00061	4.922	0.9998	MXL.omni_wg_2141_filtered.vcf.gz	PASS	2013-05-16 22:14:30	/nfs/1000g-archive/vol1/ftp/data/NA19655/alignment/NA19655.mapped.ILLUMINA.bwa.MXL.low_coverage.20120522.bam		NA19655.mapped.ILLUMINA.bwa.MXL.low_coverage.20120522.bam
12938	HG02678.mapped.ILLUMINA.bwa.GWD.low_coverage.20121211.bam	HG02678	1	ALL	BAM	0.00547	0.00631	840560	9.31	0.50109	0.00039	0.50199	0.00049	9.285	1.0226	GWD.wgs.coriell_phase3_samples.20121126.snps.affy_6.genotypes.vcf.gz	PASS	2013-05-16 22:43:27	/nfs/1000g-archive/vol1/ftp/data/HG02678/alignment/HG02678.mapped.ILLUMINA.bwa.GWD.low_coverage.20121211.bam		HG02678.mapped.ILLUMINA.bwa.GWD.low_coverage.20121211.bam
17034	HG01923.mapped.ILLUMINA.bwa.PEL.low_coverage.20130415.bam	HG01923	1	ALL	BAM	0.00547	0.0059	1304517	7.1	0.50109	0.00067	0.50155	0.00084	7.107	1.0021	PEL.omni_wg_2141_filtered.vcf.gz	PASS	2013-04-30 19:57:12	/nfs/1000g-archive/vol1/ftp/data/HG01923/alignment/HG01923.mapped.ILLUMINA.bwa.PEL.low_coverage.20130415.bam		HG01923.mapped.ILLUMINA.bwa.PEL.low_coverage.20130415.bam
59236	HG02808.mapped.ILLUMINA.bwa.GWD.low_coverage.20130415.bam	HG02808	1	ALL	BAM	0.00546	0.00586	840560	8.49	0.50097	0.00025	0.50105	0.00013	8.507	0.9985	GWD.wgs.coriell_phase3_samples.20121126.snps.affy_6.genotypes.vcf.gz	PASS	2013-05-14 03:24:34	/nfs/1000g-archive/vol1/ftp/data/HG02808/alignment/HG02808.mapped.ILLUMINA.bwa.GWD.low_coverage.20130415.bam		HG02808.mapped.ILLUMINA.bwa.GWD.low_coverage.20130415.bam
16830	HG01414.mapped.ILLUMINA.bwa.PUR.low_coverage.20130415.bam	HG01414	1	ALL	BAM	0.00546	0.00516	854341	7.91	0.49978	5e-05	0.50053	8e-05	7.925	0.9975	PUR.wgs.coriell_phase3_samples.20121126.snps.affy_6.genotypes.vcf.gz	PASS	2013-04-30 19:32:51	/nfs/1000g-archive/vol1/ftp/data/HG01414/alignment/HG01414.mapped.ILLUMINA.bwa.PUR.low_coverage.20130415.bam		HG01414.mapped.ILLUMINA.bwa.PUR.low_coverage.20130415.bam
12415	HG02679.mapped.ILLUMINA.bwa.GWD.low_coverage.20121211.bam	HG02679	1	ALL	BAM	0.00545	0.00574	840560	8.28	0.50106	0.00037	0.50103	0.0003	8.287	1.0002	GWD.wgs.coriell_phase3_samples.20121126.snps.affy_6.genotypes.vcf.gz	PASS	2013-05-16 21:33:00	/nfs/1000g-archive/vol1/ftp/data/HG02679/alignment/HG02679.mapped.ILLUMINA.bwa.GWD.low_coverage.20121211.bam		HG02679.mapped.ILLUMINA.bwa.GWD.low_coverage.20121211.bam
59157	NA19030.mapped.ILLUMINA.bwa.LWK.low_coverage.20130415.bam	NA19030	1	ALL	BAM	0.00544	0	887456	7.85	0.50015	0.00026	0	0	0	0	ALL.wgs.coriell_phase3_samples.20121126.snps.affy_6.genotypes.vcf.gz	PASS	2013-05-14 03:21:48	/nfs/1000g-archive/vol1/ftp/data/NA19030/alignment/NA19030.mapped.ILLUMINA.bwa.LWK.low_coverage.20130415.bam		NA19030.mapped.ILLUMINA.bwa.LWK.low_coverage.20130415.bam
56357	HG00140.mapped.ILLUMINA.bwa.GBR.low_coverage.20130415.bam	HG00140	1	ALL	BAM	0.00542	0.00555	1389642	10.4	0.50155	0.00019	0.50253	0.00024	10.427	0.9963	GBR.omni_wg_2141_filtered.vcf.gz	PASS	2013-05-14 01:03:03	/nfs/1000g-archive/vol1/ftp/data/HG00140/alignment/HG00140.mapped.ILLUMINA.bwa.GBR.low_coverage.20130415.bam		HG00140.mapped.ILLUMINA.bwa.GBR.low_coverage.20130415.bam
43717	HG03796.mapped.ILLUMINA.bwa.BEB.low_coverage.20130415.bam	HG03796	1	ALL	BAM	0.00542	0	1753219	11.28	0.50192	0.0004	0	0	0	0	ALL.omni_wg_2141_filtered.vcf.gz	PASS	2013-05-10 11:43:59	/nfs/1000g-archive/vol1/ftp/data/HG03796/alignment/HG03796.mapped.ILLUMINA.bwa.BEB.low_coverage.20130415.bam		HG03796.mapped.ILLUMINA.bwa.BEB.low_coverage.20130415.bam
12312	HG03928.mapped.ILLUMINA.bwa.BEB.low_coverage.20121211.bam	HG03928	1	ALL	BAM	0.0054	0.00525	783628	5.82	0.50164	3e-05	0.50111	4e-05	5.825	0.9993	BEB.wgs.coriell_phase3_samples.20121126.snps.affy_6.genotypes.vcf.gz	PASS	2013-05-16 13:24:25	/nfs/1000g-archive/vol1/ftp/data/HG03928/alignment/HG03928.mapped.ILLUMINA.bwa.BEB.low_coverage.20121211.bam		HG03928.mapped.ILLUMINA.bwa.BEB.low_coverage.20121211.bam
12709	HG03478.mapped.ILLUMINA.bwa.MSL.low_coverage.20121211.bam	HG03478	1	ALL	BAM	0.00539	0.00609	838168	6.95	0.50153	0.00062	0.50127	0.00073	6.935	1.0229	MSL.wgs.coriell_phase3_samples.20121126.snps.affy_6.genotypes.vcf.gz	PASS	2013-05-16 10:34:18	/nfs/1000g-archive/vol1/ftp/data/HG03478/alignment/HG03478.mapped.ILLUMINA.bwa.MSL.low_coverage.20121211.bam		HG03478.mapped.ILLUMINA.bwa.MSL.low_coverage.20121211.bam
25577	HG04144.mapped.ILLUMINA.bwa.BEB.low_coverage.20130415.bam	HG04144	1	ALL	BAM	0.00539	0.00529	783628	8.27	0.50086	6e-05	0.50088	4e-05	8.284	0.9995	BEB.wgs.coriell_phase3_samples.20121126.snps.affy_6.genotypes.vcf.gz	PASS	2013-05-05 06:04:58	/nfs/1000g-archive/vol1/ftp/data/HG04144/alignment/HG04144.mapped.ILLUMINA.bwa.BEB.low_coverage.20130415.bam		HG04144.mapped.ILLUMINA.bwa.BEB.low_coverage.20130415.bam
34049	NA20528.mapped.ILLUMINA.bwa.TSI.low_coverage.20130415.bam	NA20528	1	ALL	BAM	0.00538	0	887456	6.59	0.50223	0.00052	0	0	0	0	ALL.wgs.coriell_phase3_samples.20121126.snps.affy_6.genotypes.vcf.gz	PASS	2013-05-08 04:23:48	/nfs/1000g-archive/vol1/ftp/data/NA20528/alignment/NA20528.mapped.ILLUMINA.bwa.TSI.low_coverage.20130415.bam		NA20528.mapped.ILLUMINA.bwa.TSI.low_coverage.20130415.bam
26821	NA12776.mapped.ILLUMINA.bwa.CEU.low_coverage.20130415.bam	NA12776	1	ALL	BAM	0.00534	0	887456	5.54	0.50565	0.00095	0	0	0	0	ALL.wgs.coriell_phase3_samples.20121126.snps.affy_6.genotypes.vcf.gz	PASS	2013-05-05 08:24:14	/nfs/1000g-archive/vol1/ftp/data/NA12776/alignment/NA12776.mapped.ILLUMINA.bwa.CEU.low_coverage.20130415.bam		NA12776.mapped.ILLUMINA.bwa.CEU.low_coverage.20130415.bam
25616	HG04225.mapped.ILLUMINA.bwa.ITU.low_coverage.20130415.bam	HG04225	1	ALL	BAM	0.00532	0.00613	781365	6.82	0.49957	7e-05	0.50104	1e-05	6.802	1.0205	ITU.wgs.coriell_phase3_samples.20121126.snps.affy_6.genotypes.vcf.gz	PASS	2013-05-05 06:06:46	/nfs/1000g-archive/vol1/ftp/data/HG04225/alignment/HG04225.mapped.ILLUMINA.bwa.ITU.low_coverage.20130415.bam		HG04225.mapped.ILLUMINA.bwa.ITU.low_coverage.20130415.bam
8368	HG02427.mapped.ILLUMINA.bwa.ACB.low_coverage.20120522.bam	HG02427	1	ALL	BAM	0.00532	0	849391	11.72	0.50134	0.00047	0	0	0	0	ACB.wgs.coriell_phase3_samples.20121126.snps.affy_6.genotypes.vcf.gz	PASS	2013-05-16 15:45:41	/nfs/1000g-archive/vol1/ftp/data/HG02427/alignment/HG02427.mapped.ILLUMINA.bwa.ACB.low_coverage.20120522.bam		HG02427.mapped.ILLUMINA.bwa.ACB.low_coverage.20120522.bam
60204	HG02667.mapped.ILLUMINA.bwa.GWD.low_coverage.20130415.bam	HG02667	1	ALL	BAM	0.00531	0.00615	840560	8.26	0.50146	0.00062	0.50234	0.00059	8.278	0.9974	GWD.wgs.coriell_phase3_samples.20121126.snps.affy_6.genotypes.vcf.gz	PASS	2013-05-14 04:11:15	/nfs/1000g-archive/vol1/ftp/data/HG02667/alignment/HG02667.mapped.ILLUMINA.bwa.GWD.low_coverage.20130415.bam		HG02667.mapped.ILLUMINA.bwa.GWD.low_coverage.20130415.bam
20553	HG03225.mapped.ILLUMINA.bwa.MSL.low_coverage.20130415.bam	HG03225	1	ALL	BAM	0.0053	0.00632	838168	6.63	0.50081	0.0007	0.50113	0.00067	6.593	1.0284	MSL.wgs.coriell_phase3_samples.20121126.snps.affy_6.genotypes.vcf.gz	PASS	2013-05-03 05:19:50	/nfs/1000g-archive/vol1/ftp/data/HG03225/alignment/HG03225.mapped.ILLUMINA.bwa.MSL.low_coverage.20130415.bam		HG03225.mapped.ILLUMINA.bwa.MSL.low_coverage.20130415.bam
6993	NA19003.mapped.ILLUMINA.bwa.JPT.low_coverage.20120522.bam	NA19003	1	ALL	BAM	0.00529	0.00569	1243522	5.19	0.50551	0.00062	0.50642	0.00082	5.232	0.9924	JPT.omni_wg_2141_filtered.vcf.gz	PASS	2013-05-16 22:41:11	/nfs/1000g-archive/vol1/ftp/data/NA19003/alignment/NA19003.mapped.ILLUMINA.bwa.JPT.low_coverage.20120522.bam		NA19003.mapped.ILLUMINA.bwa.JPT.low_coverage.20120522.bam
12151	HG02629.mapped.ILLUMINA.bwa.GWD.low_coverage.20121211.bam	HG02629	1	ALL	BAM	0.00529	0.0051	840560	8.08	0.50106	0.0003	0.50195	0.00022	8.099	0.9979	GWD.wgs.coriell_phase3_samples.20121126.snps.affy_6.genotypes.vcf.gz	PASS	2013-05-16 19:40:49	/nfs/1000g-archive/vol1/ftp/data/HG02629/alignment/HG02629.mapped.ILLUMINA.bwa.GWD.low_coverage.20121211.bam		HG02629.mapped.ILLUMINA.bwa.GWD.low_coverage.20121211.bam
44851	NA20798.mapped.ILLUMINA.bwa.TSI.low_coverage.20130415.bam	NA20798	1	ALL	BAM	0.00528	0.00564	1402149	5.32	0.50281	0.00052	0.50232	0.00055	5.325	1.0005	TSI.omni_wg_2141_filtered.vcf.gz	PASS	2013-05-10 12:53:02	/nfs/1000g-archive/vol1/ftp/data/NA20798/alignment/NA20798.mapped.ILLUMINA.bwa.TSI.low_coverage.20130415.bam		NA20798.mapped.ILLUMINA.bwa.TSI.low_coverage.20130415.bam
10054	HG02047.mapped.ILLUMINA.bwa.KHV.low_coverage.20120522.bam	HG02047	1	ALL	BAM	0.00527	0.00482	1241587	5.83	0.50208	0.00066	0.50297	0.0008	5.837	1.001	KHV.omni_wg_2141_filtered.vcf.gz	PASS	2013-05-17 10:01:35	/nfs/1000g-archive/vol1/ftp/data/HG02047/alignment/HG02047.mapped.ILLUMINA.bwa.KHV.low_coverage.20120522.bam		HG02047.mapped.ILLUMINA.bwa.KHV.low_coverage.20120522.bam
56794	HG00178.mapped.ILLUMINA.bwa.FIN.low_coverage.20130415.bam	HG00178	1	ALL	BAM	0.00526	0	712928	8.21	0.50128	0.00037	0	0	0	0	FIN.wgs.coriell_phase3_samples.20121126.snps.affy_6.genotypes.vcf.gz	PASS	2013-05-14 01:51:00	/nfs/1000g-archive/vol1/ftp/data/HG00178/alignment/HG00178.mapped.ILLUMINA.bwa.FIN.low_coverage.20130415.bam		HG00178.mapped.ILLUMINA.bwa.FIN.low_coverage.20130415.bam
60972	HG03882.mapped.ILLUMINA.bwa.ITU.low_coverage.20130422.bam	HG03882	1	ALL	BAM	0.00526	0	1753219	8.69	0.50142	0.00025	0	0	0	0	ALL.omni_wg_2141_filtered.vcf.gz	PASS	2013-05-14 04:35:41	/nfs/1000g-archive/vol1/ftp/data/HG03882/alignment/HG03882.mapped.ILLUMINA.bwa.ITU.low_coverage.20130422.bam		HG03882.mapped.ILLUMINA.bwa.ITU.low_coverage.20130422.bam
9176	HG00530.mapped.ILLUMINA.bwa.CHS.low_coverage.20120522.bam	HG00530	1	ALL	BAM	0.00525	0.00547	1243376	3.61	0.50852	0.00079	0.50855	0.00081	3.658	0.9838	CHS.omni_wg_2141_filtered.vcf.gz	PASS	2013-05-16 22:50:50	/nfs/1000g-archive/vol1/ftp/data/HG00530/alignment/HG00530.mapped.ILLUMINA.bwa.CHS.low_coverage.20120522.bam		HG00530.mapped.ILLUMINA.bwa.CHS.low_coverage.20120522.bam
12740	HG02783.mapped.ILLUMINA.bwa.PJL.low_coverage.20121211.bam	HG02783	1	ALL	BAM	0.00524	0.00564	781539	8.93	0.50104	0.00037	0.50122	0.00033	8.901	1.0218	PJL.wgs.coriell_phase3_samples.20121126.snps.affy_6.genotypes.vcf.gz	PASS	2013-05-16 17:53:35	/nfs/1000g-archive/vol1/ftp/data/HG02783/alignment/HG02783.mapped.ILLUMINA.bwa.PJL.low_coverage.20121211.bam		HG02783.mapped.ILLUMINA.bwa.PJL.low_coverage.20121211.bam
61605	NA12749.mapped.ILLUMINA.bwa.CEU.low_coverage.20130415.bam	NA12749	1	ALL	BAM	0.00523	0.00543	1400785	8.46	0.50154	0.00031	0.50158	0.00035	8.471	0.9993	CEU.omni_wg_2141_filtered.vcf.gz	PASS	2013-05-14 04:54:03	/nfs/1000g-archive/vol1/ftp/data/NA12749/alignment/NA12749.mapped.ILLUMINA.bwa.CEU.low_coverage.20130415.bam		NA12749.mapped.ILLUMINA.bwa.CEU.low_coverage.20130415.bam
13076	HG02685.mapped.ILLUMINA.bwa.PJL.low_coverage.20121211.bam	HG02685	1	ALL	BAM	0.00522	0.00598	781539	8.24	0.50025	0.00034	0.50069	0.00037	8.256	0.9987	PJL.wgs.coriell_phase3_samples.20121126.snps.affy_6.genotypes.vcf.gz	PASS	2013-05-16 19:04:40	/nfs/1000g-archive/vol1/ftp/data/HG02685/alignment/HG02685.mapped.ILLUMINA.bwa.PJL.low_coverage.20121211.bam		HG02685.mapped.ILLUMINA.bwa.PJL.low_coverage.20121211.bam
59800	HG02635.mapped.ILLUMINA.bwa.GWD.low_coverage.20130415.bam	HG02635	1	ALL	BAM	0.00522	0.00529	840560	11.87	0.50145	0.0005	0.50091	0.00049	11.89	0.9987	GWD.wgs.coriell_phase3_samples.20121126.snps.affy_6.genotypes.vcf.gz	PASS	2013-05-14 03:52:54	/nfs/1000g-archive/vol1/ftp/data/HG02635/alignment/HG02635.mapped.ILLUMINA.bwa.GWD.low_coverage.20130415.bam		HG02635.mapped.ILLUMINA.bwa.GWD.low_coverage.20130415.bam
10302	HG00258.mapped.ILLUMINA.bwa.GBR.low_coverage.20120522.bam	HG00258	1	ALL	BAM	0.0052	0	591525	8.86	0.50992	0.00352	0	0	0	0	GBR.wgs.coriell_phase3_samples.20121126.snps.affy_6.genotypes.vcf.gz	PASS	2013-05-16 12:08:02	/nfs/1000g-archive/vol1/ftp/data/HG00258/alignment/HG00258.mapped.ILLUMINA.bwa.GBR.low_coverage.20120522.bam		HG00258.mapped.ILLUMINA.bwa.GBR.low_coverage.20120522.bam
16684	HG02262.mapped.ILLUMINA.bwa.PEL.low_coverage.20130415.bam	HG02262	1	ALL	BAM	0.00517	0.00509	779795	8.38	0.50089	1e-05	0.50159	4e-05	8.35	1.0224	PEL.wgs.coriell_phase3_samples.20121126.snps.affy_6.genotypes.vcf.gz	PASS	2013-04-30 19:19:52	/nfs/1000g-archive/vol1/ftp/data/HG02262/alignment/HG02262.mapped.ILLUMINA.bwa.PEL.low_coverage.20130415.bam		HG02262.mapped.ILLUMINA.bwa.PEL.low_coverage.20130415.bam
8101	NA19819.mapped.ILLUMINA.bwa.ASW.low_coverage.20120522.bam	NA19819	1	ALL	BAM	0.00514	0.00547	1675632	9.44	0.50149	0.00038	0.50218	0.00034	9.444	1.0019	ASW.omni_wg_2141_filtered.vcf.gz	PASS	2013-05-17 10:58:11	/nfs/1000g-archive/vol1/ftp/data/NA19819/alignment/NA19819.mapped.ILLUMINA.bwa.ASW.low_coverage.20120522.bam		NA19819.mapped.ILLUMINA.bwa.ASW.low_coverage.20120522.bam
12541	HG03250.mapped.ILLUMINA.bwa.GWD.low_coverage.20121211.bam	HG03250	0	ALL	BAM	0.00512	0.00686	840560	6.46	0.50007	0.00014	0.501	7e-05	6.46	1.0147	GWD.wgs.coriell_phase3_samples.20121126.snps.affy_6.genotypes.vcf.gz	PASS	2013-05-16 14:47:32	/nfs/1000g-archive/vol1/ftp/data/HG03250/alignment/HG03250.mapped.ILLUMINA.bwa.GWD.low_coverage.20121211.bam		HG03250.mapped.ILLUMINA.bwa.GWD.low_coverage.20121211.bam
12940	HG03025.mapped.ILLUMINA.bwa.GWD.low_coverage.20121211.bam	HG03025	1	ALL	BAM	0.00512	0.00481	840560	6.84	0.50098	0.00015	0.50113	0.00016	6.857	0.9977	GWD.wgs.coriell_phase3_samples.20121126.snps.affy_6.genotypes.vcf.gz	PASS	2013-05-16 10:44:25	/nfs/1000g-archive/vol1/ftp/data/HG03025/alignment/HG03025.mapped.ILLUMINA.bwa.GWD.low_coverage.20121211.bam		HG03025.mapped.ILLUMINA.bwa.GWD.low_coverage.20121211.bam
21242	HG03354.mapped.ILLUMINA.bwa.ESN.low_coverage.20130415.bam	HG03354	1	ALL	BAM	0.00511	0.00556	835395	6.2	0.50051	7e-05	0.50059	9e-05	6.199	0.9991	ESN.wgs.coriell_phase3_samples.20121126.snps.affy_6.genotypes.vcf.gz	PASS	2013-05-03 06:51:01	/nfs/1000g-archive/vol1/ftp/data/HG03354/alignment/HG03354.mapped.ILLUMINA.bwa.ESN.low_coverage.20130415.bam		HG03354.mapped.ILLUMINA.bwa.ESN.low_coverage.20130415.bam
13042	HG02666.mapped.ILLUMINA.bwa.GWD.low_coverage.20121211.bam	HG02666	1	ALL	BAM	0.00511	0.00538	840560	9.2	0.50015	0.00045	0.50136	0.00056	9.177	1.0229	GWD.wgs.coriell_phase3_samples.20121126.snps.affy_6.genotypes.vcf.gz	PASS	2013-05-16 14:03:51	/nfs/1000g-archive/vol1/ftp/data/HG02666/alignment/HG02666.mapped.ILLUMINA.bwa.GWD.low_coverage.20121211.bam		HG02666.mapped.ILLUMINA.bwa.GWD.low_coverage.20121211.bam
9829	HG02407.mapped.ILLUMINA.bwa.CDX.low_coverage.20120522.bam	HG02407	1	ALL	BAM	0.00511	0.00519	1235978	6.25	0.50106	0.00016	0.50157	0.00025	6.262	1.0002	CDX.omni_wg_2141_filtered.vcf.gz	PASS	2013-05-17 04:08:32	/nfs/1000g-archive/vol1/ftp/data/HG02407/alignment/HG02407.mapped.ILLUMINA.bwa.CDX.low_coverage.20120522.bam		HG02407.mapped.ILLUMINA.bwa.CDX.low_coverage.20120522.bam
12672	HG02688.mapped.ILLUMINA.bwa.PJL.low_coverage.20121211.bam	HG02688	1	ALL	BAM	0.00511	0.0051	781539	10.67	0.50075	0.00032	0.5013	0.00033	10.697	0.9981	PJL.wgs.coriell_phase3_samples.20121126.snps.affy_6.genotypes.vcf.gz	PASS	2013-05-16 20:07:52	/nfs/1000g-archive/vol1/ftp/data/HG02688/alignment/HG02688.mapped.ILLUMINA.bwa.PJL.low_coverage.20121211.bam		HG02688.mapped.ILLUMINA.bwa.PJL.low_coverage.20121211.bam
11476	HG02661.mapped.ILLUMINA.bwa.PJL.low_coverage.20121211.bam	HG02661	1	ALL	BAM	0.0051	0	1753219	9.46	0.50127	0.00034	0	0	0	0	ALL.omni_wg_2141_filtered.vcf.gz	PASS	2013-05-17 16:15:35	/nfs/1000g-archive/vol1/ftp/data/HG02661/alignment/HG02661.mapped.ILLUMINA.bwa.PJL.low_coverage.20121211.bam		HG02661.mapped.ILLUMINA.bwa.PJL.low_coverage.20121211.bam
41545	HG03887.mapped.ILLUMINA.bwa.STU.low_coverage.20130415.bam	HG03887	1	ALL	BAM	0.0051	0	1753219	8.73	0.50192	0.00031	0	0	0	0	ALL.omni_wg_2141_filtered.vcf.gz	PASS	2013-05-10 10:12:52	/nfs/1000g-archive/vol1/ftp/data/HG03887/alignment/HG03887.mapped.ILLUMINA.bwa.STU.low_coverage.20130415.bam		HG03887.mapped.ILLUMINA.bwa.STU.low_coverage.20130415.bam
60426	HG02620.mapped.ILLUMINA.bwa.GWD.low_coverage.20130415.bam	HG02620	1	ALL	BAM	0.00508	0.00533	840560	8.91	0.50078	0.00048	0.50305	0.0005	8.871	1.0263	GWD.wgs.coriell_phase3_samples.20121126.snps.affy_6.genotypes.vcf.gz	PASS	2013-05-14 04:24:31	/nfs/1000g-archive/vol1/ftp/data/HG02620/alignment/HG02620.mapped.ILLUMINA.bwa.GWD.low_coverage.20130415.bam		HG02620.mapped.ILLUMINA.bwa.GWD.low_coverage.20130415.bam
34100	NA20519.mapped.ILLUMINA.bwa.TSI.low_coverage.20130415.bam	NA20519	1	ALL	BAM	0.00506	0.0054	1402149	6.03	0.50048	0.00058	0.50214	0.00053	6.036	0.9999	TSI.omni_wg_2141_filtered.vcf.gz	PASS	2013-05-08 04:25:12	/nfs/1000g-archive/vol1/ftp/data/NA20519/alignment/NA20519.mapped.ILLUMINA.bwa.TSI.low_coverage.20130415.bam		NA20519.mapped.ILLUMINA.bwa.TSI.low_coverage.20130415.bam
56614	HG02757.mapped.ILLUMINA.bwa.GWD.low_coverage.20130415.bam	HG02757	1	ALL	BAM	0.00506	0.00506	840560	8.39	0.50079	0.00025	0.50141	0.00023	8.413	0.9979	GWD.wgs.coriell_phase3_samples.20121126.snps.affy_6.genotypes.vcf.gz	PASS	2013-05-14 01:36:34	/nfs/1000g-archive/vol1/ftp/data/HG02757/alignment/HG02757.mapped.ILLUMINA.bwa.GWD.low_coverage.20130415.bam		HG02757.mapped.ILLUMINA.bwa.GWD.low_coverage.20130415.bam
17070	HG01414.mapped.ILLUMINA.bwa.PUR.low_coverage.20130415.bam	HG01414	1	ALL	BAM	0.00505	0	1558284	7.62	0.50044	0.0002	0	0	0	0	PUR.omni_wg_2141_filtered.vcf.gz	PASS	2013-04-30 20:02:48	/nfs/1000g-archive/vol1/ftp/data/HG01414/alignment/HG01414.mapped.ILLUMINA.bwa.PUR.low_coverage.20130415.bam		HG01414.mapped.ILLUMINA.bwa.PUR.low_coverage.20130415.bam
41242	HG00368.mapped.ILLUMINA.bwa.FIN.low_coverage.20130415.bam	HG00368	1	ALL	BAM	0.00504	0	712928	6.65	0.50142	0.00054	0	0	0	0	FIN.wgs.coriell_phase3_samples.20121126.snps.affy_6.genotypes.vcf.gz	PASS	2013-05-10 09:59:31	/nfs/1000g-archive/vol1/ftp/data/HG00368/alignment/HG00368.mapped.ILLUMINA.bwa.FIN.low_coverage.20130415.bam		HG00368.mapped.ILLUMINA.bwa.FIN.low_coverage.20130415.bam
15954	HG02358.mapped.ILLUMINA.bwa.CDX.low_coverage.20130415.bam	HG02358	0	ALL	BAM	0.00504	0	1235978	4.41	0.50109	0.00084	0	0	0	0	CDX.omni_wg_2141_filtered.vcf.gz	PASS	2013-04-30 18:20:24	/nfs/1000g-archive/vol1/ftp/data/HG02358/alignment/HG02358.mapped.ILLUMINA.bwa.CDX.low_coverage.20130415.bam		HG02358.mapped.ILLUMINA.bwa.CDX.low_coverage.20130415.bam
28158	HG03986.mapped.ILLUMINA.bwa.STU.low_coverage.20130415.bam	HG03986	1	ALL	BAM	0.00504	0	1753219	8.8	0.50198	0.00036	0	0	0	0	ALL.omni_wg_2141_filtered.vcf.gz	PASS	2013-05-05 11:19:53	/nfs/1000g-archive/vol1/ftp/data/HG03986/alignment/HG03986.mapped.ILLUMINA.bwa.STU.low_coverage.20130415.bam		HG03986.mapped.ILLUMINA.bwa.STU.low_coverage.20130415.bam
9572	NA19452.mapped.ILLUMINA.bwa.LWK.low_coverage.20120522.bam	NA19452	1	ALL	BAM	0.00503	0.00592	1570264	4.89	0.50426	0.00046	0.50496	0.00058	4.911	0.996	LWK.omni_wg_2141_filtered.vcf.gz	PASS	2013-05-17 04:58:55	/nfs/1000g-archive/vol1/ftp/data/NA19452/alignment/NA19452.mapped.ILLUMINA.bwa.LWK.low_coverage.20120522.bam		NA19452.mapped.ILLUMINA.bwa.LWK.low_coverage.20120522.bam
21133	HG03238.mapped.ILLUMINA.bwa.PJL.low_coverage.20130415.bam	HG03238	1	ALL	BAM	0.00503	0.00519	781539	8.17	0.50139	0.00054	0.50028	0.00045	8.184	0.9983	PJL.wgs.coriell_phase3_samples.20121126.snps.affy_6.genotypes.vcf.gz	PASS	2013-05-03 06:22:32	/nfs/1000g-archive/vol1/ftp/data/HG03238/alignment/HG03238.mapped.ILLUMINA.bwa.PJL.low_coverage.20130415.bam		HG03238.mapped.ILLUMINA.bwa.PJL.low_coverage.20130415.bam
15065	HG02154.mapped.ILLUMINA.bwa.CDX.low_coverage.20130415.bam	HG02154	1	ALL	BAM	0.00502	0	665690	4.55	0.50421	0.00192	0	0	0	0	CDX.wgs.coriell_phase3_samples.20121126.snps.affy_6.genotypes.vcf.gz	PASS	2013-04-30 17:25:57	/nfs/1000g-archive/vol1/ftp/data/HG02154/alignment/HG02154.mapped.ILLUMINA.bwa.CDX.low_coverage.20130415.bam		HG02154.mapped.ILLUMINA.bwa.CDX.low_coverage.20130415.bam
17260	HG00451.mapped.ILLUMINA.bwa.CHS.low_coverage.20130415.bam	HG00451	1	ALL	BAM	0.00501	0.00529	1243376	7.61	0.5024	0.00026	0.50182	0.0003	7.621	0.9995	CHS.omni_wg_2141_filtered.vcf.gz	PASS	2013-04-30 20:19:47	/nfs/1000g-archive/vol1/ftp/data/HG00451/alignment/HG00451.mapped.ILLUMINA.bwa.CHS.low_coverage.20130415.bam		HG00451.mapped.ILLUMINA.bwa.CHS.low_coverage.20130415.bam
21609	HG03238.mapped.ILLUMINA.bwa.PJL.low_coverage.20130415.bam	HG03238	1	ALL	BAM	0.00501	0	1753219	7.84	0.50177	0.00021	0	0	0	0	ALL.omni_wg_2141_filtered.vcf.gz	PASS	2013-05-03 07:52:29	/nfs/1000g-archive/vol1/ftp/data/HG03238/alignment/HG03238.mapped.ILLUMINA.bwa.PJL.low_coverage.20130415.bam		HG03238.mapped.ILLUMINA.bwa.PJL.low_coverage.20130415.bam
8658	NA11992.mapped.ILLUMINA.bwa.CEU.low_coverage.20120522.bam	NA11992	1	ALL	BAM	0.00499	0.00519	1400785	7.23	0.50253	0.00039	0.50353	0.0004	7.251	0.9956	CEU.omni_wg_2141_filtered.vcf.gz	PASS	2013-05-17 00:58:55	/nfs/1000g-archive/vol1/ftp/data/NA11992/alignment/NA11992.mapped.ILLUMINA.bwa.CEU.low_coverage.20120522.bam		NA11992.mapped.ILLUMINA.bwa.CEU.low_coverage.20120522.bam
35435	NA20530.mapped.ILLUMINA.bwa.TSI.low_coverage.20130415.bam	NA20530	1	ALL	BAM	0.00499	0.00515	1402149	7.98	0.50235	0.00047	0.50269	0.00047	7.986	1	TSI.omni_wg_2141_filtered.vcf.gz	PASS	2013-05-08 08:22:56	/nfs/1000g-archive/vol1/ftp/data/NA20530/alignment/NA20530.mapped.ILLUMINA.bwa.TSI.low_coverage.20130415.bam		NA20530.mapped.ILLUMINA.bwa.TSI.low_coverage.20130415.bam
13013	HG00632.mapped.ILLUMINA.bwa.CHS.low_coverage.20121211.bam	HG00632	1	ALL	BAM	0.00499	0.00443	662328	7.42	0.50243	0.00054	0.5022	0.00052	7.442	0.9971	CHS.wgs.coriell_phase3_samples.20121126.snps.affy_6.genotypes.vcf.gz	PASS	2013-05-16 22:10:16	/nfs/1000g-archive/vol1/ftp/data/HG00632/alignment/HG00632.mapped.ILLUMINA.bwa.CHS.low_coverage.20121211.bam		HG00632.mapped.ILLUMINA.bwa.CHS.low_coverage.20121211.bam
12441	HG02657.mapped.ILLUMINA.bwa.PJL.low_coverage.20121211.bam	HG02657	1	ALL	BAM	0.00499	0	1753219	7.95	0.50218	0.00041	0	0	0	0	ALL.omni_wg_2141_filtered.vcf.gz	PASS	2013-05-17 12:24:34	/nfs/1000g-archive/vol1/ftp/data/HG02657/alignment/HG02657.mapped.ILLUMINA.bwa.PJL.low_coverage.20121211.bam		HG02657.mapped.ILLUMINA.bwa.PJL.low_coverage.20121211.bam
9409	NA19703.mapped.ILLUMINA.bwa.ASW.low_coverage.20120522.bam	NA19703	1	ALL	BAM	0.00499	0	718973	6.5	0.51138	0.00469	0	0	0	0	ASW.wgs.coriell_phase3_samples.20121126.snps.affy_6.genotypes.vcf.gz	PASS	2013-05-16 16:55:24	/nfs/1000g-archive/vol1/ftp/data/NA19703/alignment/NA19703.mapped.ILLUMINA.bwa.ASW.low_coverage.20120522.bam		NA19703.mapped.ILLUMINA.bwa.ASW.low_coverage.20120522.bam
48631	NA18944.mapped.ILLUMINA.bwa.JPT.low_coverage.20130415.bam	NA18944	1	ALL	BAM	0.00498	0	887456	5.4	0.49882	0.0003	0	0	0	0	ALL.wgs.coriell_phase3_samples.20121126.snps.affy_6.genotypes.vcf.gz	PASS	2013-05-10 20:07:46	/nfs/1000g-archive/vol1/ftp/data/NA18944/alignment/NA18944.mapped.ILLUMINA.bwa.JPT.low_coverage.20130415.bam		NA18944.mapped.ILLUMINA.bwa.JPT.low_coverage.20130415.bam
9447	NA19917.mapped.ILLUMINA.bwa.ASW.low_coverage.20120522.bam	NA19917	1	ALL	BAM	0.00497	0.00563	1675632	5.92	0.50127	0.00026	0.50297	0.00038	5.968	0.9863	ASW.omni_wg_2141_filtered.vcf.gz	PASS	2013-05-16 14:43:10	/nfs/1000g-archive/vol1/ftp/data/NA19917/alignment/NA19917.mapped.ILLUMINA.bwa.ASW.low_coverage.20120522.bam		NA19917.mapped.ILLUMINA.bwa.ASW.low_coverage.20120522.bam
7954	HG01190.mapped.ILLUMINA.bwa.PUR.low_coverage.20120522.bam	HG01190	1	ALL	BAM	0.00497	0.00556	1558284	5.19	0.50356	0.00056	0.50332	0.00036	5.21	0.9937	PUR.omni_wg_2141_filtered.vcf.gz	PASS	2013-05-16 19:50:19	/nfs/1000g-archive/vol1/ftp/data/HG01190/alignment/HG01190.mapped.ILLUMINA.bwa.PUR.low_coverage.20120522.bam		HG01190.mapped.ILLUMINA.bwa.PUR.low_coverage.20120522.bam
44216	HG03770.mapped.ILLUMINA.bwa.ITU.low_coverage.20130415.bam	HG03770	1	ALL	BAM	0.00497	0.00518	781365	10.68	0.50074	0.00028	0.50075	0.00022	10.7	0.9961	ITU.wgs.coriell_phase3_samples.20121126.snps.affy_6.genotypes.vcf.gz	PASS	2013-05-10 12:05:01	/nfs/1000g-archive/vol1/ftp/data/HG03770/alignment/HG03770.mapped.ILLUMINA.bwa.ITU.low_coverage.20130415.bam		HG03770.mapped.ILLUMINA.bwa.ITU.low_coverage.20130415.bam
17081	HG01269.mapped.ILLUMINA.bwa.CLM.low_coverage.20130415.bam	HG01269	1	ALL	BAM	0.00496	0	1493063	6.54	0.50236	0.00038	0	0	0	0	CLM.omni_wg_2141_filtered.vcf.gz	PASS	2013-04-30 20:04:14	/nfs/1000g-archive/vol1/ftp/data/HG01269/alignment/HG01269.mapped.ILLUMINA.bwa.CLM.low_coverage.20130415.bam		HG01269.mapped.ILLUMINA.bwa.CLM.low_coverage.20130415.bam
11491	HG02688.mapped.ILLUMINA.bwa.PJL.low_coverage.20121211.bam	HG02688	1	ALL	BAM	0.00496	0	1753219	10.35	0.5008	0.00036	0	0	0	0	ALL.omni_wg_2141_filtered.vcf.gz	PASS	2013-05-17 06:55:02	/nfs/1000g-archive/vol1/ftp/data/HG02688/alignment/HG02688.mapped.ILLUMINA.bwa.PJL.low_coverage.20121211.bam		HG02688.mapped.ILLUMINA.bwa.PJL.low_coverage.20121211.bam
12458	HG00622.mapped.ILLUMINA.bwa.CHS.low_coverage.20121211.bam	HG00622	1	ALL	BAM	0.00495	0.00485	662328	9.36	0.50085	0.00055	0.50489	0.00065	9.331	1.0215	CHS.wgs.coriell_phase3_samples.20121126.snps.affy_6.genotypes.vcf.gz	PASS	2013-05-16 10:27:33	/nfs/1000g-archive/vol1/ftp/data/HG00622/alignment/HG00622.mapped.ILLUMINA.bwa.CHS.low_coverage.20121211.bam		HG00622.mapped.ILLUMINA.bwa.CHS.low_coverage.20121211.bam
16383	HG02262.mapped.ILLUMINA.bwa.PEL.low_coverage.20130415.bam	HG02262	1	ALL	BAM	0.00495	0	1304517	8.33	0.50127	0.00023	0	0	0	0	PEL.omni_wg_2141_filtered.vcf.gz	PASS	2013-04-30 18:58:30	/nfs/1000g-archive/vol1/ftp/data/HG02262/alignment/HG02262.mapped.ILLUMINA.bwa.PEL.low_coverage.20130415.bam		HG02262.mapped.ILLUMINA.bwa.PEL.low_coverage.20130415.bam
10116	NA21088.mapped.ILLUMINA.bwa.GIH.low_coverage.20120522.bam	NA21088	1	ALL	BAM	0.00494	0.00496	1368816	6.51	0.50204	0.00028	0.50174	0.00043	6.518	1.0012	GIH.omni_wg_2141_filtered.vcf.gz	PASS	2013-05-17 11:33:09	/nfs/1000g-archive/vol1/ftp/data/NA21088/alignment/NA21088.mapped.ILLUMINA.bwa.GIH.low_coverage.20120522.bam		NA21088.mapped.ILLUMINA.bwa.GIH.low_coverage.20120522.bam
15746	HG00303.mapped.ILLUMINA.bwa.FIN.low_coverage.20130415.bam	HG00303	0	ALL	BAM	0.00493	0.00152	712928	2.79	0.50156	0.00022	0.50179	0.00024	2.785	1.0218	FIN.wgs.coriell_phase3_samples.20121126.snps.affy_6.genotypes.vcf.gz	PASS	2013-04-30 18:04:12	/nfs/1000g-archive/vol1/ftp/data/HG00303/alignment/HG00303.mapped.ILLUMINA.bwa.FIN.low_coverage.20130415.bam		HG00303.mapped.ILLUMINA.bwa.FIN.low_coverage.20130415.bam
8853	NA19313.mapped.ILLUMINA.bwa.LWK.low_coverage.20120522.bam	NA19313	0	ALL	BAM	0.00492	0.006	1570264	4.33	0.50176	0.00023	0.5018	0.00043	4.308	1.0125	LWK.omni_wg_2141_filtered.vcf.gz	PASS	2013-05-17 06:22:26	/nfs/1000g-archive/vol1/ftp/data/NA19313/alignment/NA19313.mapped.ILLUMINA.bwa.LWK.low_coverage.20120522.bam		NA19313.mapped.ILLUMINA.bwa.LWK.low_coverage.20120522.bam
12453	HG02716.mapped.ILLUMINA.bwa.GWD.low_coverage.20121211.bam	HG02716	1	ALL	BAM	0.00492	0.00487	840560	9.11	0.50078	0.00019	0.50066	0.00027	9.132	0.9967	GWD.wgs.coriell_phase3_samples.20121126.snps.affy_6.genotypes.vcf.gz	PASS	2013-05-16 21:58:35	/nfs/1000g-archive/vol1/ftp/data/HG02716/alignment/HG02716.mapped.ILLUMINA.bwa.GWD.low_coverage.20121211.bam		HG02716.mapped.ILLUMINA.bwa.GWD.low_coverage.20121211.bam
11864	HG02586.mapped.ILLUMINA.bwa.GWD.low_coverage.20121211.bam	HG02586	1	ALL	BAM	0.00492	0	1753219	10.61	0.50055	0.00035	0	0	0	0	ALL.omni_wg_2141_filtered.vcf.gz	PASS	2013-05-16 20:03:18	/nfs/1000g-archive/vol1/ftp/data/HG02586/alignment/HG02586.mapped.ILLUMINA.bwa.GWD.low_coverage.20121211.bam		HG02586.mapped.ILLUMINA.bwa.GWD.low_coverage.20121211.bam
12742	HG02783.mapped.ILLUMINA.bwa.PJL.low_coverage.20121211.bam	HG02783	1	ALL	BAM	0.00491	0	1753219	8.82	0.5019	0.00029	0	0	0	0	ALL.omni_wg_2141_filtered.vcf.gz	PASS	2013-05-17 04:21:52	/nfs/1000g-archive/vol1/ftp/data/HG02783/alignment/HG02783.mapped.ILLUMINA.bwa.PJL.low_coverage.20121211.bam		HG02783.mapped.ILLUMINA.bwa.PJL.low_coverage.20121211.bam
12794	HG03307.mapped.ILLUMINA.bwa.ESN.low_coverage.20121211.bam	HG03307	0	ALL	BAM	0.0049	0.00571	835395	8.33	0.50052	0.00014	0.50101	0.00014	8.314	1.0223	ESN.wgs.coriell_phase3_samples.20121126.snps.affy_6.genotypes.vcf.gz	PASS	2013-05-16 18:18:17	/nfs/1000g-archive/vol1/ftp/data/HG03307/alignment/HG03307.mapped.ILLUMINA.bwa.ESN.low_coverage.20121211.bam		HG03307.mapped.ILLUMINA.bwa.ESN.low_coverage.20121211.bam
16840	HG01860.mapped.ILLUMINA.bwa.KHV.low_coverage.20130415.bam	HG01860	1	ALL	BAM	0.0049	0.00463	1241587	7.88	0.50086	0.00054	0.50117	0.00062	7.89	1.0008	KHV.omni_wg_2141_filtered.vcf.gz	PASS	2013-04-30 19:33:16	/nfs/1000g-archive/vol1/ftp/data/HG01860/alignment/HG01860.mapped.ILLUMINA.bwa.KHV.low_coverage.20130415.bam		HG01860.mapped.ILLUMINA.bwa.KHV.low_coverage.20130415.bam
13045	HG03048.mapped.ILLUMINA.bwa.GWD.low_coverage.20121211.bam	HG03048	1	ALL	BAM	0.00489	0.00512	840560	10.08	0.50082	0.00014	0.50164	0.00013	10.053	1.0213	GWD.wgs.coriell_phase3_samples.20121126.snps.affy_6.genotypes.vcf.gz	PASS	2013-05-16 18:17:07	/nfs/1000g-archive/vol1/ftp/data/HG03048/alignment/HG03048.mapped.ILLUMINA.bwa.GWD.low_coverage.20121211.bam		HG03048.mapped.ILLUMINA.bwa.GWD.low_coverage.20121211.bam
16495	HG01393.mapped.ILLUMINA.bwa.PUR.low_coverage.20130415.bam	HG01393	1	ALL	BAM	0.00487	0.00479	854341	6.27	0.5002	0.00018	0.50198	0.0001	6.277	1.0001	PUR.wgs.coriell_phase3_samples.20121126.snps.affy_6.genotypes.vcf.gz	PASS	2013-04-30 19:05:06	/nfs/1000g-archive/vol1/ftp/data/HG01393/alignment/HG01393.mapped.ILLUMINA.bwa.PUR.low_coverage.20130415.bam		HG01393.mapped.ILLUMINA.bwa.PUR.low_coverage.20130415.bam
61810	HG03121.mapped.ILLUMINA.bwa.ESN.low_coverage.20130415.bam	HG03121	1	ALL	BAM	0.00487	0	1753219	8.48	0.50027	0.00043	0	0	0	0	ALL.omni_wg_2141_filtered.vcf.gz	PASS	2013-05-14 04:56:44	/nfs/1000g-archive/vol1/ftp/data/HG03121/alignment/HG03121.mapped.ILLUMINA.bwa.ESN.low_coverage.20130415.bam		HG03121.mapped.ILLUMINA.bwa.ESN.low_coverage.20130415.bam
12951	HG02654.mapped.ILLUMINA.bwa.PJL.low_coverage.20121211.bam	HG02654	1	ALL	BAM	0.00486	0.00509	781539	9.15	0.50142	0.00035	0.50148	0.00035	9.109	1.0231	PJL.wgs.coriell_phase3_samples.20121126.snps.affy_6.genotypes.vcf.gz	PASS	2013-05-16 17:24:08	/nfs/1000g-archive/vol1/ftp/data/HG02654/alignment/HG02654.mapped.ILLUMINA.bwa.PJL.low_coverage.20121211.bam		HG02654.mapped.ILLUMINA.bwa.PJL.low_coverage.20121211.bam
56386	HG00536.mapped.ILLUMINA.bwa.CHS.low_coverage.20130415.bam	HG00536	1	ALL	BAM	0.00486	0.00477	1243376	10.23	0.50127	0.00016	0.50138	0.00024	10.251	0.9988	CHS.omni_wg_2141_filtered.vcf.gz	PASS	2013-05-14 01:12:26	/nfs/1000g-archive/vol1/ftp/data/HG00536/alignment/HG00536.mapped.ILLUMINA.bwa.CHS.low_coverage.20130415.bam		HG00536.mapped.ILLUMINA.bwa.CHS.low_coverage.20130415.bam
55656	HG01894.mapped.ILLUMINA.bwa.ACB.low_coverage.20130415.bam	HG01894	1	ALL	BAM	0.00486	0.00465	1597764	5.27	0.50202	0.00035	0.50292	0.00049	5.282	0.9994	ACB.omni_wg_2141_filtered.vcf.gz	PASS	2013-05-13 23:44:31	/nfs/1000g-archive/vol1/ftp/data/HG01894/alignment/HG01894.mapped.ILLUMINA.bwa.ACB.low_coverage.20130415.bam		HG01894.mapped.ILLUMINA.bwa.ACB.low_coverage.20130415.bam
12642	HG03045.mapped.ILLUMINA.bwa.GWD.low_coverage.20121211.bam	HG03045	1	ALL	BAM	0.00485	0.00549	840560	7.73	0.50038	0.00046	0.50096	0.00043	7.701	1.0254	GWD.wgs.coriell_phase3_samples.20121126.snps.affy_6.genotypes.vcf.gz	PASS	2013-05-16 16:09:17	/nfs/1000g-archive/vol1/ftp/data/HG03045/alignment/HG03045.mapped.ILLUMINA.bwa.GWD.low_coverage.20121211.bam		HG03045.mapped.ILLUMINA.bwa.GWD.low_coverage.20121211.bam
12490	HG02725.mapped.ILLUMINA.bwa.PJL.low_coverage.20121211.bam	HG02725	1	ALL	BAM	0.00484	0.00477	781539	9.95	0.50076	0.00026	0.50094	0.00029	9.974	0.9969	PJL.wgs.coriell_phase3_samples.20121126.snps.affy_6.genotypes.vcf.gz	PASS	2013-05-16 19:00:23	/nfs/1000g-archive/vol1/ftp/data/HG02725/alignment/HG02725.mapped.ILLUMINA.bwa.PJL.low_coverage.20121211.bam		HG02725.mapped.ILLUMINA.bwa.PJL.low_coverage.20121211.bam
12518	NA19792.mapped.ILLUMINA.bwa.MXL.low_coverage.20121211.bam	NA19792	1	ALL	BAM	0.00484	0.00389	671518	8.94	0.50174	0.00061	0.50118	0.00063	8.907	1.0217	MXL.wgs.coriell_phase3_samples.20121126.snps.affy_6.genotypes.vcf.gz	PASS	2013-05-16 12:05:36	/nfs/1000g-archive/vol1/ftp/data/NA19792/alignment/NA19792.mapped.ILLUMINA.bwa.MXL.low_coverage.20121211.bam		NA19792.mapped.ILLUMINA.bwa.MXL.low_coverage.20121211.bam
45582	HG03978.mapped.ILLUMINA.bwa.ITU.low_coverage.20130415.bam	HG03978	1	ALL	BAM	0.00484	0	1753219	9.46	0.50118	0.00035	0	0	0	0	ALL.omni_wg_2141_filtered.vcf.gz	PASS	2013-05-10 13:15:13	/nfs/1000g-archive/vol1/ftp/data/HG03978/alignment/HG03978.mapped.ILLUMINA.bwa.ITU.low_coverage.20130415.bam		HG03978.mapped.ILLUMINA.bwa.ITU.low_coverage.20130415.bam
8717	HG00188.mapped.ILLUMINA.bwa.FIN.low_coverage.20121211.bam	HG00188	1	ALL	BAM	0.00482	0.00446	1385013	7.13	0.50216	0.00034	0.50203	0.00042	7.136	0.9997	FIN.omni_wg_2141_filtered.vcf.gz	PASS	2013-05-16 20:18:54	/nfs/1000g-archive/vol1/ftp/data/HG00188/alignment/HG00188.mapped.ILLUMINA.bwa.FIN.low_coverage.20121211.bam		HG00188.mapped.ILLUMINA.bwa.FIN.low_coverage.20121211.bam
9382	NA19472.mapped.ILLUMINA.bwa.LWK.low_coverage.20120522.bam	NA19472	1	ALL	BAM	0.00481	0.00507	1570264	7.49	0.50307	0.0003	0.50346	0.00045	7.524	0.9948	LWK.omni_wg_2141_filtered.vcf.gz	PASS	2013-05-17 06:25:12	/nfs/1000g-archive/vol1/ftp/data/NA19472/alignment/NA19472.mapped.ILLUMINA.bwa.LWK.low_coverage.20120522.bam		NA19472.mapped.ILLUMINA.bwa.LWK.low_coverage.20120522.bam
10671	NA19075.mapped.ILLUMINA.bwa.JPT.low_coverage.20120522.bam	NA19075	1	ALL	BAM	0.00479	0.00455	1243522	5.05	0.50519	0.00127	0.50391	0.00108	5.063	0.9983	JPT.omni_wg_2141_filtered.vcf.gz	PASS	2013-05-16 12:45:24	/nfs/1000g-archive/vol1/ftp/data/NA19075/alignment/NA19075.mapped.ILLUMINA.bwa.JPT.low_coverage.20120522.bam		NA19075.mapped.ILLUMINA.bwa.JPT.low_coverage.20120522.bam
20982	HG02774.mapped.ILLUMINA.bwa.PJL.low_coverage.20130415.bam	HG02774	1	ALL	BAM	0.00478	0.00543	781539	7.73	0.50045	4e-05	0.50064	1e-05	7.693	1.0243	PJL.wgs.coriell_phase3_samples.20121126.snps.affy_6.genotypes.vcf.gz	PASS	2013-05-03 05:49:31	/nfs/1000g-archive/vol1/ftp/data/HG02774/alignment/HG02774.mapped.ILLUMINA.bwa.PJL.low_coverage.20130415.bam		HG02774.mapped.ILLUMINA.bwa.PJL.low_coverage.20130415.bam
40172	NA21133.mapped.ILLUMINA.bwa.GIH.low_coverage.20130415.bam	NA21133	1	ALL	BAM	0.00478	0	1368816	8.19	0.50053	0.00029	0	0	0	0	GIH.omni_wg_2141_filtered.vcf.gz	PASS	2013-05-10 08:23:30	/nfs/1000g-archive/vol1/ftp/data/NA21133/alignment/NA21133.mapped.ILLUMINA.bwa.GIH.low_coverage.20130415.bam		NA21133.mapped.ILLUMINA.bwa.GIH.low_coverage.20130415.bam
22061	HG03642.mapped.ILLUMINA.bwa.STU.low_coverage.20130415.bam	HG03642	1	ALL	BAM	0.00477	0.00479	779732	10.82	0.50079	0.00017	0.50103	0.00015	10.848	0.9982	STU.wgs.coriell_phase3_samples.20121126.snps.affy_6.genotypes.vcf.gz	PASS	2013-05-03 09:17:23	/nfs/1000g-archive/vol1/ftp/data/HG03642/alignment/HG03642.mapped.ILLUMINA.bwa.STU.low_coverage.20130415.bam		HG03642.mapped.ILLUMINA.bwa.STU.low_coverage.20130415.bam
62364	NA19439.mapped.ILLUMINA.bwa.LWK.low_coverage.20130415.bam	NA19439	1	ALL	BAM	0.00474	0.00483	1570264	7.66	0.50103	0.00047	0.50231	0.00063	7.671	0.9978	LWK.omni_wg_2141_filtered.vcf.gz	PASS	2013-05-14 05:52:11	/nfs/1000g-archive/vol1/ftp/data/NA19439/alignment/NA19439.mapped.ILLUMINA.bwa.LWK.low_coverage.20130415.bam		NA19439.mapped.ILLUMINA.bwa.LWK.low_coverage.20130415.bam
8556	NA19720.mapped.ILLUMINA.bwa.MXL.low_coverage.20120522.bam	NA19720	1	ALL	BAM	0.00472	0.00066	1437703	6.7	0.50008	0.00018	0.5026	0.00029	6.708	0.9966	MXL.omni_wg_2141_filtered.vcf.gz	PASS	2013-05-17 09:23:24	/nfs/1000g-archive/vol1/ftp/data/NA19720/alignment/NA19720.mapped.ILLUMINA.bwa.MXL.low_coverage.20120522.bam		NA19720.mapped.ILLUMINA.bwa.MXL.low_coverage.20120522.bam
16392	HG01765.mapped.ILLUMINA.bwa.IBS.low_coverage.20130415.bam	HG01765	1	ALL	BAM	0.00471	0.00508	753862	8.28	0.50085	4e-05	0.50191	3e-05	8.238	1.0248	IBS.wgs.coriell_phase3_samples.20121126.snps.affy_6.genotypes.vcf.gz	PASS	2013-04-30 18:59:00	/nfs/1000g-archive/vol1/ftp/data/HG01765/alignment/HG01765.mapped.ILLUMINA.bwa.IBS.low_coverage.20130415.bam		HG01765.mapped.ILLUMINA.bwa.IBS.low_coverage.20130415.bam
21425	HG03508.mapped.ILLUMINA.bwa.ESN.low_coverage.20130415.bam	HG03508	0	ALL	BAM	0.00471	0.00475	835395	9.7	0.50089	0.0008	0.50098	0.00073	9.721	0.9979	ESN.wgs.coriell_phase3_samples.20121126.snps.affy_6.genotypes.vcf.gz	PASS	2013-05-03 07:24:13	/nfs/1000g-archive/vol1/ftp/data/HG03508/alignment/HG03508.mapped.ILLUMINA.bwa.ESN.low_coverage.20130415.bam		HG03508.mapped.ILLUMINA.bwa.ESN.low_coverage.20130415.bam
34479	NA18626.mapped.ILLUMINA.bwa.CHB.low_coverage.20130415.bam	NA18626	1	ALL	BAM	0.00471	0.00469	1252142	8.33	0.50088	0.00061	0.50153	0.00072	8.342	0.9989	CHB.omni_wg_2141_filtered.vcf.gz	PASS	2013-05-08 05:25:16	/nfs/1000g-archive/vol1/ftp/data/NA18626/alignment/NA18626.mapped.ILLUMINA.bwa.CHB.low_coverage.20130415.bam		NA18626.mapped.ILLUMINA.bwa.CHB.low_coverage.20130415.bam
12725	HG03826.mapped.ILLUMINA.bwa.BEB.low_coverage.20121211.bam	HG03826	1	ALL	BAM	0.00471	0.00463	783628	6.76	0.50188	7e-05	0.50195	8e-05	6.768	0.9999	BEB.wgs.coriell_phase3_samples.20121126.snps.affy_6.genotypes.vcf.gz	PASS	2013-05-16 06:19:19	/nfs/1000g-archive/vol1/ftp/data/HG03826/alignment/HG03826.mapped.ILLUMINA.bwa.BEB.low_coverage.20121211.bam		HG03826.mapped.ILLUMINA.bwa.BEB.low_coverage.20121211.bam
12578	HG02685.mapped.ILLUMINA.bwa.PJL.low_coverage.20121211.bam	HG02685	1	ALL	BAM	0.00471	0	1753219	7.99	0.50165	0.00024	0	0	0	0	ALL.omni_wg_2141_filtered.vcf.gz	PASS	2013-05-17 15:33:02	/nfs/1000g-archive/vol1/ftp/data/HG02685/alignment/HG02685.mapped.ILLUMINA.bwa.PJL.low_coverage.20121211.bam		HG02685.mapped.ILLUMINA.bwa.PJL.low_coverage.20121211.bam
12084	HG03931.mapped.ILLUMINA.bwa.BEB.low_coverage.20121211.bam	HG03931	1	ALL	BAM	0.00471	0	1753219	6.1	0.50069	0.00016	0	0	0	0	ALL.omni_wg_2141_filtered.vcf.gz	PASS	2013-05-17 03:43:31	/nfs/1000g-archive/vol1/ftp/data/HG03931/alignment/HG03931.mapped.ILLUMINA.bwa.BEB.low_coverage.20121211.bam		HG03931.mapped.ILLUMINA.bwa.BEB.low_coverage.20121211.bam
20971	HG03567.mapped.ILLUMINA.bwa.MSL.low_coverage.20130415.bam	HG03567	1	ALL	BAM	0.0047	0.005	838168	8.3	0.50243	0.00066	0.50162	0.00054	8.299	1.0002	MSL.wgs.coriell_phase3_samples.20121126.snps.affy_6.genotypes.vcf.gz	PASS	2013-05-03 05:47:06	/nfs/1000g-archive/vol1/ftp/data/HG03567/alignment/HG03567.mapped.ILLUMINA.bwa.MSL.low_coverage.20130415.bam		HG03567.mapped.ILLUMINA.bwa.MSL.low_coverage.20130415.bam
12996	HG02728.mapped.ILLUMINA.bwa.PJL.low_coverage.20121211.bam	HG02728	1	ALL	BAM	0.0047	0.00491	781539	8.43	0.5003	0.00032	0.5008	0.00032	8.444	0.9983	PJL.wgs.coriell_phase3_samples.20121126.snps.affy_6.genotypes.vcf.gz	PASS	2013-05-16 21:14:47	/nfs/1000g-archive/vol1/ftp/data/HG02728/alignment/HG02728.mapped.ILLUMINA.bwa.PJL.low_coverage.20121211.bam		HG02728.mapped.ILLUMINA.bwa.PJL.low_coverage.20121211.bam
49144	NA11920.mapped.ILLUMINA.bwa.CEU.low_coverage.20130415.bam	NA11920	1	ALL	BAM	0.0047	0.00476	1400785	10.47	0.50269	0.00044	0.50277	0.00046	10.502	0.996	CEU.omni_wg_2141_filtered.vcf.gz	PASS	2013-05-10 20:36:15	/nfs/1000g-archive/vol1/ftp/data/NA11920/alignment/NA11920.mapped.ILLUMINA.bwa.CEU.low_coverage.20130415.bam		NA11920.mapped.ILLUMINA.bwa.CEU.low_coverage.20130415.bam
13038	HG02634.mapped.ILLUMINA.bwa.GWD.low_coverage.20121211.bam	HG02634	1	ALL	BAM	0.00469	0.00521	840560	9.45	0.50058	0.00021	0.50135	0.00027	9.435	1.0221	GWD.wgs.coriell_phase3_samples.20121126.snps.affy_6.genotypes.vcf.gz	PASS	2013-05-16 12:56:03	/nfs/1000g-archive/vol1/ftp/data/HG02634/alignment/HG02634.mapped.ILLUMINA.bwa.GWD.low_coverage.20121211.bam		HG02634.mapped.ILLUMINA.bwa.GWD.low_coverage.20121211.bam
12935	HG02786.mapped.ILLUMINA.bwa.PJL.low_coverage.20121211.bam	HG02786	1	ALL	BAM	0.00468	0.00502	781539	8.81	0.50064	0.00033	0.50119	0.00037	8.791	1.0198	PJL.wgs.coriell_phase3_samples.20121126.snps.affy_6.genotypes.vcf.gz	PASS	2013-05-16 18:42:08	/nfs/1000g-archive/vol1/ftp/data/HG02786/alignment/HG02786.mapped.ILLUMINA.bwa.PJL.low_coverage.20121211.bam		HG02786.mapped.ILLUMINA.bwa.PJL.low_coverage.20121211.bam
60724	HG02768.mapped.ILLUMINA.bwa.GWD.low_coverage.20130415.bam	HG02768	1	ALL	BAM	0.00468	0	1753219	9.69	0.50038	0.00044	0	0	0	0	ALL.omni_wg_2141_filtered.vcf.gz	PASS	2013-05-14 04:33:25	/nfs/1000g-archive/vol1/ftp/data/HG02768/alignment/HG02768.mapped.ILLUMINA.bwa.GWD.low_coverage.20130415.bam		HG02768.mapped.ILLUMINA.bwa.GWD.low_coverage.20130415.bam
9373	NA19916.mapped.ILLUMINA.bwa.ASW.low_coverage.20120522.bam	NA19916	1	ALL	BAM	0.00467	0.00537	1675632	5.33	0.50109	0.00017	0.50329	0.00037	5.36	0.9908	ASW.omni_wg_2141_filtered.vcf.gz	PASS	2013-05-16 19:31:47	/nfs/1000g-archive/vol1/ftp/data/NA19916/alignment/NA19916.mapped.ILLUMINA.bwa.ASW.low_coverage.20120522.bam		NA19916.mapped.ILLUMINA.bwa.ASW.low_coverage.20120522.bam
20317	HG03574.mapped.ILLUMINA.bwa.MSL.low_coverage.20130415.bam	HG03574	0	ALL	BAM	0.00467	0.00523	838168	6.25	0.50108	0.0006	0.50077	0.00068	6.235	1.0226	MSL.wgs.coriell_phase3_samples.20121126.snps.affy_6.genotypes.vcf.gz	PASS	2013-05-03 05:05:04	/nfs/1000g-archive/vol1/ftp/data/HG03574/alignment/HG03574.mapped.ILLUMINA.bwa.MSL.low_coverage.20130415.bam		HG03574.mapped.ILLUMINA.bwa.MSL.low_coverage.20130415.bam
12534	NA19023.mapped.ILLUMINA.bwa.LWK.low_coverage.20121211.bam	NA19023	1	ALL	BAM	0.00466	0	1570264	10.76	0.5016	0.00042	0	0	0	0	LWK.omni_wg_2141_filtered.vcf.gz	PASS	2013-05-17 08:40:25	/nfs/1000g-archive/vol1/ftp/data/NA19023/alignment/NA19023.mapped.ILLUMINA.bwa.LWK.low_coverage.20121211.bam		NA19023.mapped.ILLUMINA.bwa.LWK.low_coverage.20121211.bam
20907	HG03708.mapped.ILLUMINA.bwa.PJL.low_coverage.20130415.bam	HG03708	1	ALL	BAM	0.00463	0.0055	781539	6.93	0.49985	7e-05	0.50037	1e-05	6.896	1.0245	PJL.wgs.coriell_phase3_samples.20121126.snps.affy_6.genotypes.vcf.gz	PASS	2013-05-03 05:39:54	/nfs/1000g-archive/vol1/ftp/data/HG03708/alignment/HG03708.mapped.ILLUMINA.bwa.PJL.low_coverage.20130415.bam		HG03708.mapped.ILLUMINA.bwa.PJL.low_coverage.20130415.bam
12459	HG02654.mapped.ILLUMINA.bwa.PJL.low_coverage.20121211.bam	HG02654	1	ALL	BAM	0.00462	0	1753219	9.08	0.50194	0.00026	0	0	0	0	ALL.omni_wg_2141_filtered.vcf.gz	PASS	2013-05-17 06:25:56	/nfs/1000g-archive/vol1/ftp/data/HG02654/alignment/HG02654.mapped.ILLUMINA.bwa.PJL.low_coverage.20121211.bam		HG02654.mapped.ILLUMINA.bwa.PJL.low_coverage.20121211.bam
15612	HG01923.mapped.ILLUMINA.bwa.PEL.low_coverage.20130415.bam	HG01923	1	ALL	BAM	0.00461	0	779795	7.08	0.50162	0.00055	0	0	0	0	PEL.wgs.coriell_phase3_samples.20121126.snps.affy_6.genotypes.vcf.gz	PASS	2013-04-30 17:55:40	/nfs/1000g-archive/vol1/ftp/data/HG01923/alignment/HG01923.mapped.ILLUMINA.bwa.PEL.low_coverage.20130415.bam		HG01923.mapped.ILLUMINA.bwa.PEL.low_coverage.20130415.bam
64349	HG02635.mapped.ILLUMINA.bwa.GWD.low_coverage.20130415.bam	HG02635	1	ALL	BAM	0.0046	0	1753219	11.64	0.50067	0.00018	0	0	0	0	ALL.omni_wg_2141_filtered.vcf.gz	PASS	2013-05-14 08:54:32	/nfs/1000g-archive/vol1/ftp/data/HG02635/alignment/HG02635.mapped.ILLUMINA.bwa.GWD.low_coverage.20130415.bam		HG02635.mapped.ILLUMINA.bwa.GWD.low_coverage.20130415.bam
17043	HG00113.mapped.ILLUMINA.bwa.GBR.low_coverage.20130415.bam	HG00113	1	ALL	BAM	0.00459	0.00451	1389642	9.3	0.50107	0.00015	0.50116	0.0003	9.313	0.9996	GBR.omni_wg_2141_filtered.vcf.gz	PASS	2013-04-30 19:57:40	/nfs/1000g-archive/vol1/ftp/data/HG00113/alignment/HG00113.mapped.ILLUMINA.bwa.GBR.low_coverage.20130415.bam		HG00113.mapped.ILLUMINA.bwa.GBR.low_coverage.20130415.bam
59360	HG02585.mapped.ILLUMINA.bwa.GWD.low_coverage.20130415.bam	HG02585	1	ALL	BAM	0.00458	0.00487	840560	10.33	0.50054	0.00016	0.50198	0.00015	10.311	1.0224	GWD.wgs.coriell_phase3_samples.20121126.snps.affy_6.genotypes.vcf.gz	PASS	2013-05-14 03:34:56	/nfs/1000g-archive/vol1/ftp/data/HG02585/alignment/HG02585.mapped.ILLUMINA.bwa.GWD.low_coverage.20130415.bam		HG02585.mapped.ILLUMINA.bwa.GWD.low_coverage.20130415.bam
16232	HG01393.mapped.ILLUMINA.bwa.PUR.low_coverage.20130415.bam	HG01393	1	ALL	BAM	0.00458	0	1558284	6.09	0.50051	0.00042	0	0	0	0	PUR.omni_wg_2141_filtered.vcf.gz	PASS	2013-04-30 18:46:53	/nfs/1000g-archive/vol1/ftp/data/HG01393/alignment/HG01393.mapped.ILLUMINA.bwa.PUR.low_coverage.20130415.bam		HG01393.mapped.ILLUMINA.bwa.PUR.low_coverage.20130415.bam
12844	HG02884.mapped.ILLUMINA.bwa.GWD.low_coverage.20121211.bam	HG02884	1	ALL	BAM	0.00457	0.00532	840560	6.47	0.50062	0.00024	0.50052	0.0003	6.45	1.0233	GWD.wgs.coriell_phase3_samples.20121126.snps.affy_6.genotypes.vcf.gz	PASS	2013-05-16 19:15:14	/nfs/1000g-archive/vol1/ftp/data/HG02884/alignment/HG02884.mapped.ILLUMINA.bwa.GWD.low_coverage.20121211.bam		HG02884.mapped.ILLUMINA.bwa.GWD.low_coverage.20121211.bam
12066	HG02624.mapped.ILLUMINA.bwa.GWD.low_coverage.20121211.bam	HG02624	1	ALL	BAM	0.00457	0.00454	840560	9.57	0.50166	0.00018	0.50142	0.00024	9.595	0.9974	GWD.wgs.coriell_phase3_samples.20121126.snps.affy_6.genotypes.vcf.gz	PASS	2013-05-16 15:09:55	/nfs/1000g-archive/vol1/ftp/data/HG02624/alignment/HG02624.mapped.ILLUMINA.bwa.GWD.low_coverage.20121211.bam		HG02624.mapped.ILLUMINA.bwa.GWD.low_coverage.20121211.bam
10450	NA19908.mapped.ILLUMINA.bwa.ASW.low_coverage.20120522.bam	NA19908	1	ALL	BAM	0.00457	0.00454	1675632	5.11	0.50023	0.0001	0.50234	0.00053	5.116	0.998	ASW.omni_wg_2141_filtered.vcf.gz	PASS	2013-05-17 03:19:28	/nfs/1000g-archive/vol1/ftp/data/NA19908/alignment/NA19908.mapped.ILLUMINA.bwa.ASW.low_coverage.20120522.bam		NA19908.mapped.ILLUMINA.bwa.ASW.low_coverage.20120522.bam
9391	HG02396.mapped.ILLUMINA.bwa.CDX.low_coverage.20120522.bam	HG02396	1	ALL	BAM	0.00456	0.00459	1235978	5.75	0.50147	0.00015	0.50111	0.00024	5.751	1.0001	CDX.omni_wg_2141_filtered.vcf.gz	PASS	2013-05-16 23:11:39	/nfs/1000g-archive/vol1/ftp/data/HG02396/alignment/HG02396.mapped.ILLUMINA.bwa.CDX.low_coverage.20120522.bam		HG02396.mapped.ILLUMINA.bwa.CDX.low_coverage.20120522.bam
11208	HG00622.mapped.ILLUMINA.bwa.CHS.low_coverage.20121211.bam	HG00622	1	ALL	BAM	0.00453	0	1243376	9.32	0.50169	0.00084	0	0	0	0	CHS.omni_wg_2141_filtered.vcf.gz	PASS	2013-05-17 04:35:00	/nfs/1000g-archive/vol1/ftp/data/HG00622/alignment/HG00622.mapped.ILLUMINA.bwa.CHS.low_coverage.20121211.bam		HG00622.mapped.ILLUMINA.bwa.CHS.low_coverage.20121211.bam
12637	HG02786.mapped.ILLUMINA.bwa.PJL.low_coverage.20121211.bam	HG02786	1	ALL	BAM	0.00453	0	1753219	8.69	0.50188	0.00023	0	0	0	0	ALL.omni_wg_2141_filtered.vcf.gz	PASS	2013-05-17 16:49:27	/nfs/1000g-archive/vol1/ftp/data/HG02786/alignment/HG02786.mapped.ILLUMINA.bwa.PJL.low_coverage.20121211.bam		HG02786.mapped.ILLUMINA.bwa.PJL.low_coverage.20121211.bam
12635	HG03794.mapped.ILLUMINA.bwa.BEB.low_coverage.20121211.bam	HG03794	0	ALL	BAM	0.00452	0.00563	783628	5.75	0.49999	0.00012	0.50112	6e-05	5.735	1.0222	BEB.wgs.coriell_phase3_samples.20121126.snps.affy_6.genotypes.vcf.gz	PASS	2013-05-16 09:01:43	/nfs/1000g-archive/vol1/ftp/data/HG03794/alignment/HG03794.mapped.ILLUMINA.bwa.BEB.low_coverage.20121211.bam		HG03794.mapped.ILLUMINA.bwa.BEB.low_coverage.20121211.bam
7736	NA19451.mapped.ILLUMINA.bwa.LWK.low_coverage.20120522.bam	NA19451	1	ALL	BAM	0.00451	0.00507	1570264	4.95	0.50188	0.00047	0.50373	0.00068	4.958	0.999	LWK.omni_wg_2141_filtered.vcf.gz	PASS	2013-05-17 04:27:13	/nfs/1000g-archive/vol1/ftp/data/NA19451/alignment/NA19451.mapped.ILLUMINA.bwa.LWK.low_coverage.20120522.bam		NA19451.mapped.ILLUMINA.bwa.LWK.low_coverage.20120522.bam
12298	HG02464.mapped.ILLUMINA.bwa.GWD.low_coverage.20121211.bam	HG02464	1	ALL	BAM	0.00451	0.00483	840560	9.09	0.5009	0.00041	0.50102	0.00045	9.06	1.0229	GWD.wgs.coriell_phase3_samples.20121126.snps.affy_6.genotypes.vcf.gz	PASS	2013-05-17 00:35:44	/nfs/1000g-archive/vol1/ftp/data/HG02464/alignment/HG02464.mapped.ILLUMINA.bwa.GWD.low_coverage.20121211.bam		HG02464.mapped.ILLUMINA.bwa.GWD.low_coverage.20121211.bam
12544	HG02784.mapped.ILLUMINA.bwa.PJL.low_coverage.20121211.bam	HG02784	1	ALL	BAM	0.00451	0.0044	781539	9.09	0.50082	0.00023	0.50098	0.00029	9.11	0.9977	PJL.wgs.coriell_phase3_samples.20121126.snps.affy_6.genotypes.vcf.gz	PASS	2013-05-16 16:58:20	/nfs/1000g-archive/vol1/ftp/data/HG02784/alignment/HG02784.mapped.ILLUMINA.bwa.PJL.low_coverage.20121211.bam		HG02784.mapped.ILLUMINA.bwa.PJL.low_coverage.20121211.bam
27063	HG04098.mapped.ILLUMINA.bwa.ITU.low_coverage.20130415.bam	HG04098	1	ALL	BAM	0.00451	0	1753219	7.33	0.5009	0.00019	0	0	0	0	ALL.omni_wg_2141_filtered.vcf.gz	PASS	2013-05-05 08:54:11	/nfs/1000g-archive/vol1/ftp/data/HG04098/alignment/HG04098.mapped.ILLUMINA.bwa.ITU.low_coverage.20130415.bam		HG04098.mapped.ILLUMINA.bwa.ITU.low_coverage.20130415.bam
21801	HG03007.mapped.ILLUMINA.bwa.BEB.low_coverage.20130415.bam	HG03007	1	ALL	BAM	0.0045	0.00466	783628	10.31	0.50191	0.00039	0.50222	0.00044	10.349	0.9963	BEB.wgs.coriell_phase3_samples.20121126.snps.affy_6.genotypes.vcf.gz	PASS	2013-05-03 08:30:03	/nfs/1000g-archive/vol1/ftp/data/HG03007/alignment/HG03007.mapped.ILLUMINA.bwa.BEB.low_coverage.20130415.bam		HG03007.mapped.ILLUMINA.bwa.BEB.low_coverage.20130415.bam
20521	HG03304.mapped.ILLUMINA.bwa.ESN.low_coverage.20130415.bam	HG03304	1	ALL	BAM	0.00449	0.00545	835395	6.3	0.50128	0.00011	0.50103	4e-05	6.279	1.0258	ESN.wgs.coriell_phase3_samples.20121126.snps.affy_6.genotypes.vcf.gz	PASS	2013-05-03 05:18:15	/nfs/1000g-archive/vol1/ftp/data/HG03304/alignment/HG03304.mapped.ILLUMINA.bwa.ESN.low_coverage.20130415.bam		HG03304.mapped.ILLUMINA.bwa.ESN.low_coverage.20130415.bam
12489	HG02697.mapped.ILLUMINA.bwa.PJL.low_coverage.20121211.bam	HG02697	1	ALL	BAM	0.00449	0.00423	781539	9.19	0.50107	0.00041	0.50099	0.00039	9.214	0.9975	PJL.wgs.coriell_phase3_samples.20121126.snps.affy_6.genotypes.vcf.gz	PASS	2013-05-17 01:04:34	/nfs/1000g-archive/vol1/ftp/data/HG02697/alignment/HG02697.mapped.ILLUMINA.bwa.PJL.low_coverage.20121211.bam		HG02697.mapped.ILLUMINA.bwa.PJL.low_coverage.20121211.bam
15573	HG00304.mapped.ILLUMINA.bwa.FIN.low_coverage.20130415.bam	HG00304	1	ALL	BAM	0.00449	0.00056	712928	3.55	0.50101	0.00014	0.5003	0.00021	3.557	0.9977	FIN.wgs.coriell_phase3_samples.20121126.snps.affy_6.genotypes.vcf.gz	PASS	2013-04-30 17:53:32	/nfs/1000g-archive/vol1/ftp/data/HG00304/alignment/HG00304.mapped.ILLUMINA.bwa.FIN.low_coverage.20130415.bam		HG00304.mapped.ILLUMINA.bwa.FIN.low_coverage.20130415.bam
45164	HG03770.mapped.ILLUMINA.bwa.ITU.low_coverage.20130415.bam	HG03770	1	ALL	BAM	0.00449	0	1753219	10.4	0.50146	0.00028	0	0	0	0	ALL.omni_wg_2141_filtered.vcf.gz	PASS	2013-05-10 13:05:28	/nfs/1000g-archive/vol1/ftp/data/HG03770/alignment/HG03770.mapped.ILLUMINA.bwa.ITU.low_coverage.20130415.bam		HG03770.mapped.ILLUMINA.bwa.ITU.low_coverage.20130415.bam
58084	HG02944.mapped.ILLUMINA.bwa.ESN.low_coverage.20130415.bam	HG02944	1	ALL	BAM	0.00448	0.00483	835395	9.04	0.50139	0.00025	0.50183	0.0002	9.021	1.0218	ESN.wgs.coriell_phase3_samples.20121126.snps.affy_6.genotypes.vcf.gz	PASS	2013-05-14 02:49:09	/nfs/1000g-archive/vol1/ftp/data/HG02944/alignment/HG02944.mapped.ILLUMINA.bwa.ESN.low_coverage.20130415.bam		HG02944.mapped.ILLUMINA.bwa.ESN.low_coverage.20130415.bam
13171	HG03046.mapped.ILLUMINA.bwa.GWD.low_coverage.20121211.bam	HG03046	1	ALL	BAM	0.00448	0.00449	840560	8.07	0.50139	0.00011	0.50083	0.00012	8.099	0.9967	GWD.wgs.coriell_phase3_samples.20121126.snps.affy_6.genotypes.vcf.gz	PASS	2013-05-16 16:41:18	/nfs/1000g-archive/vol1/ftp/data/HG03046/alignment/HG03046.mapped.ILLUMINA.bwa.GWD.low_coverage.20121211.bam		HG03046.mapped.ILLUMINA.bwa.GWD.low_coverage.20121211.bam
6732	HG01168.mapped.ILLUMINA.bwa.PUR.low_coverage.20120522.bam	HG01168	1	ALL	BAM	0.00447	0.00613	1558284	3.67	0.50389	0.00032	0.50166	0.00062	3.682	0.9925	PUR.omni_wg_2141_filtered.vcf.gz	PASS	2013-05-16 23:52:07	/nfs/1000g-archive/vol1/ftp/data/HG01168/alignment/HG01168.mapped.ILLUMINA.bwa.PUR.low_coverage.20120522.bam		HG01168.mapped.ILLUMINA.bwa.PUR.low_coverage.20120522.bam
15182	HG01119.mapped.ILLUMINA.bwa.CLM.low_coverage.20130415.bam	HG01119	1	ALL	BAM	0.00447	0.00496	832763	7.91	0.50127	0.0001	0.50579	4e-05	7.93	0.9975	CLM.wgs.coriell_phase3_samples.20121126.snps.affy_6.genotypes.vcf.gz	PASS	2013-04-30 17:32:44	/nfs/1000g-archive/vol1/ftp/data/HG01119/alignment/HG01119.mapped.ILLUMINA.bwa.CLM.low_coverage.20130415.bam		HG01119.mapped.ILLUMINA.bwa.CLM.low_coverage.20130415.bam
59599	HG02643.mapped.ILLUMINA.bwa.GWD.low_coverage.20130415.bam	HG02643	1	ALL	BAM	0.00447	0.00478	840560	8.06	0.50112	0.00043	0.50088	0.00038	8.068	0.999	GWD.wgs.coriell_phase3_samples.20121126.snps.affy_6.genotypes.vcf.gz	PASS	2013-05-14 03:49:59	/nfs/1000g-archive/vol1/ftp/data/HG02643/alignment/HG02643.mapped.ILLUMINA.bwa.GWD.low_coverage.20130415.bam		HG02643.mapped.ILLUMINA.bwa.GWD.low_coverage.20130415.bam
12135	HG02583.mapped.ILLUMINA.bwa.GWD.low_coverage.20121211.bam	HG02583	1	ALL	BAM	0.00446	0.00469	840560	8.84	0.49986	0.0001	0.50021	0.00013	8.858	0.9987	GWD.wgs.coriell_phase3_samples.20121126.snps.affy_6.genotypes.vcf.gz	PASS	2013-05-16 22:08:12	/nfs/1000g-archive/vol1/ftp/data/HG02583/alignment/HG02583.mapped.ILLUMINA.bwa.GWD.low_coverage.20121211.bam		HG02583.mapped.ILLUMINA.bwa.GWD.low_coverage.20121211.bam
12674	HG02807.mapped.ILLUMINA.bwa.GWD.low_coverage.20121211.bam	HG02807	1	ALL	BAM	0.00445	0.00474	840560	8.16	0.50146	0.00016	0.50114	0.0002	8.139	1.0232	GWD.wgs.coriell_phase3_samples.20121126.snps.affy_6.genotypes.vcf.gz	PASS	2013-05-16 17:36:24	/nfs/1000g-archive/vol1/ftp/data/HG02807/alignment/HG02807.mapped.ILLUMINA.bwa.GWD.low_coverage.20121211.bam		HG02807.mapped.ILLUMINA.bwa.GWD.low_coverage.20121211.bam
10481	HG01191.mapped.ILLUMINA.bwa.PUR.low_coverage.20120522.bam	HG01191	1	ALL	BAM	0.00445	0.00472	1558284	5.54	0.50205	0.00036	0.50279	0.00047	5.556	0.9927	PUR.omni_wg_2141_filtered.vcf.gz	PASS	2013-05-16 21:03:57	/nfs/1000g-archive/vol1/ftp/data/HG01191/alignment/HG01191.mapped.ILLUMINA.bwa.PUR.low_coverage.20120522.bam		HG01191.mapped.ILLUMINA.bwa.PUR.low_coverage.20120522.bam
56238	HG00473.mapped.ILLUMINA.bwa.CHS.low_coverage.20130415.bam	HG00473	1	ALL	BAM	0.00445	0.00466	1243376	10.67	0.50195	0.00018	0.50266	0.0002	10.704	0.9975	CHS.omni_wg_2141_filtered.vcf.gz	PASS	2013-05-14 00:50:34	/nfs/1000g-archive/vol1/ftp/data/HG00473/alignment/HG00473.mapped.ILLUMINA.bwa.CHS.low_coverage.20130415.bam		HG00473.mapped.ILLUMINA.bwa.CHS.low_coverage.20130415.bam
8278	HG01167.mapped.ILLUMINA.bwa.PUR.low_coverage.20120522.bam	HG01167	1	ALL	BAM	0.00445	0.00445	1558284	14.65	0.50018	0.00022	0.50116	0.00018	14.687	0.9953	PUR.omni_wg_2141_filtered.vcf.gz	PASS	2013-05-17 10:36:13	/nfs/1000g-archive/vol1/ftp/data/HG01167/alignment/HG01167.mapped.ILLUMINA.bwa.PUR.low_coverage.20120522.bam		HG01167.mapped.ILLUMINA.bwa.PUR.low_coverage.20120522.bam
11229	HG02728.mapped.ILLUMINA.bwa.PJL.low_coverage.20121211.bam	HG02728	1	ALL	BAM	0.00445	0	1753219	8.17	0.50169	0.00023	0	0	0	0	ALL.omni_wg_2141_filtered.vcf.gz	PASS	2013-05-17 09:24:43	/nfs/1000g-archive/vol1/ftp/data/HG02728/alignment/HG02728.mapped.ILLUMINA.bwa.PJL.low_coverage.20121211.bam		HG02728.mapped.ILLUMINA.bwa.PJL.low_coverage.20121211.bam
32099	NA18547.mapped.ILLUMINA.bwa.CHB.low_coverage.20130415.bam	NA18547	1	ALL	BAM	0.00443	0.00443	1252142	7.36	0.50037	0.00023	0.50141	0.00026	7.373	0.998	CHB.omni_wg_2141_filtered.vcf.gz	PASS	2013-05-08 01:50:53	/nfs/1000g-archive/vol1/ftp/data/NA18547/alignment/NA18547.mapped.ILLUMINA.bwa.CHB.low_coverage.20130415.bam		NA18547.mapped.ILLUMINA.bwa.CHB.low_coverage.20130415.bam
31889	NA19147.mapped.ILLUMINA.bwa.YRI.low_coverage.20130415.bam	NA19147	1	ALL	BAM	0.00443	0	887456	5.23	0.49702	0.00029	0	0	0	0	ALL.wgs.coriell_phase3_samples.20121126.snps.affy_6.genotypes.vcf.gz	PASS	2013-05-08 01:29:48	/nfs/1000g-archive/vol1/ftp/data/NA19147/alignment/NA19147.mapped.ILLUMINA.bwa.YRI.low_coverage.20130415.bam		NA19147.mapped.ILLUMINA.bwa.YRI.low_coverage.20130415.bam
16395	HG01064.mapped.ILLUMINA.bwa.PUR.low_coverage.20130415.bam	HG01064	1	ALL	BAM	0.00442	0	1558284	4.23	0.50362	0.00146	0	0	0	0	PUR.omni_wg_2141_filtered.vcf.gz	PASS	2013-04-30 18:59:12	/nfs/1000g-archive/vol1/ftp/data/HG01064/alignment/HG01064.mapped.ILLUMINA.bwa.PUR.low_coverage.20130415.bam		HG01064.mapped.ILLUMINA.bwa.PUR.low_coverage.20130415.bam
22039	HG03007.mapped.ILLUMINA.bwa.BEB.low_coverage.20130415.bam	HG03007	1	ALL	BAM	0.00442	0	1753219	10.13	0.50343	0.0004	0	0	0	0	ALL.omni_wg_2141_filtered.vcf.gz	PASS	2013-05-03 09:06:04	/nfs/1000g-archive/vol1/ftp/data/HG03007/alignment/HG03007.mapped.ILLUMINA.bwa.BEB.low_coverage.20130415.bam		HG03007.mapped.ILLUMINA.bwa.BEB.low_coverage.20130415.bam
13124	HG02724.mapped.ILLUMINA.bwa.PJL.low_coverage.20121211.bam	HG02724	1	ALL	BAM	0.00441	0.00477	781539	8.83	0.50082	0.00035	0.50095	0.00035	8.803	1.0195	PJL.wgs.coriell_phase3_samples.20121126.snps.affy_6.genotypes.vcf.gz	PASS	2013-05-16 18:05:23	/nfs/1000g-archive/vol1/ftp/data/HG02724/alignment/HG02724.mapped.ILLUMINA.bwa.PJL.low_coverage.20121211.bam		HG02724.mapped.ILLUMINA.bwa.PJL.low_coverage.20121211.bam
25044	HG03901.mapped.ILLUMINA.bwa.BEB.low_coverage.20130415.bam	HG03901	0	ALL	BAM	0.00441	0.00305	783628	4.08	0.49967	0.00023	0.50091	0.00025	4.086	1.0003	BEB.wgs.coriell_phase3_samples.20121126.snps.affy_6.genotypes.vcf.gz	PASS	2013-05-05 05:40:04	/nfs/1000g-archive/vol1/ftp/data/HG03901/alignment/HG03901.mapped.ILLUMINA.bwa.BEB.low_coverage.20130415.bam		HG03901.mapped.ILLUMINA.bwa.BEB.low_coverage.20130415.bam
13148	HG02595.mapped.ILLUMINA.bwa.GWD.low_coverage.20121211.bam	HG02595	1	ALL	BAM	0.0044	0.00426	840560	8.09	0.50175	0.00021	0.50168	0.00033	8.121	0.9945	GWD.wgs.coriell_phase3_samples.20121126.snps.affy_6.genotypes.vcf.gz	PASS	2013-05-16 21:25:47	/nfs/1000g-archive/vol1/ftp/data/HG02595/alignment/HG02595.mapped.ILLUMINA.bwa.GWD.low_coverage.20121211.bam		HG02595.mapped.ILLUMINA.bwa.GWD.low_coverage.20121211.bam
9367	HG01948.mapped.ILLUMINA.bwa.PEL.low_coverage.20120522.bam	HG01948	1	ALL	BAM	0.0044	0	779795	5.75	0.50368	0.00168	0	0	0	0	PEL.wgs.coriell_phase3_samples.20121126.snps.affy_6.genotypes.vcf.gz	PASS	2013-05-16 16:37:45	/nfs/1000g-archive/vol1/ftp/data/HG01948/alignment/HG01948.mapped.ILLUMINA.bwa.PEL.low_coverage.20120522.bam		HG01948.mapped.ILLUMINA.bwa.PEL.low_coverage.20120522.bam
7972	NA19085.mapped.ILLUMINA.bwa.JPT.low_coverage.20120522.bam	NA19085	1	ALL	BAM	0.00439	0.00475	1243522	10.68	0.50233	0.00024	0.50195	0.00029	10.704	0.9989	JPT.omni_wg_2141_filtered.vcf.gz	PASS	2013-05-17 03:18:49	/nfs/1000g-archive/vol1/ftp/data/NA19085/alignment/NA19085.mapped.ILLUMINA.bwa.JPT.low_coverage.20120522.bam		NA19085.mapped.ILLUMINA.bwa.JPT.low_coverage.20120522.bam
12405	HG02582.mapped.ILLUMINA.bwa.GWD.low_coverage.20121211.bam	HG02582	1	ALL	BAM	0.00438	0.00478	840560	9.89	0.50195	0.00013	0.50207	0.00016	9.866	1.0225	GWD.wgs.coriell_phase3_samples.20121126.snps.affy_6.genotypes.vcf.gz	PASS	2013-05-16 11:56:57	/nfs/1000g-archive/vol1/ftp/data/HG02582/alignment/HG02582.mapped.ILLUMINA.bwa.GWD.low_coverage.20121211.bam		HG02582.mapped.ILLUMINA.bwa.GWD.low_coverage.20121211.bam
13095	HG03832.mapped.ILLUMINA.bwa.BEB.low_coverage.20121211.bam	HG03832	1	ALL	BAM	0.00438	0.00446	783628	5.04	0.50077	0.00012	0.50075	0.00013	5.05	0.9985	BEB.wgs.coriell_phase3_samples.20121126.snps.affy_6.genotypes.vcf.gz	PASS	2013-05-16 18:13:59	/nfs/1000g-archive/vol1/ftp/data/HG03832/alignment/HG03832.mapped.ILLUMINA.bwa.BEB.low_coverage.20121211.bam		HG03832.mapped.ILLUMINA.bwa.BEB.low_coverage.20121211.bam
12643	HG02734.mapped.ILLUMINA.bwa.PJL.low_coverage.20121211.bam	HG02734	1	ALL	BAM	0.00437	0.00514	781539	9.59	0.50042	0.0002	0.50056	0.00031	9.612	0.9975	PJL.wgs.coriell_phase3_samples.20121126.snps.affy_6.genotypes.vcf.gz	PASS	2013-05-16 17:35:47	/nfs/1000g-archive/vol1/ftp/data/HG02734/alignment/HG02734.mapped.ILLUMINA.bwa.PJL.low_coverage.20121211.bam		HG02734.mapped.ILLUMINA.bwa.PJL.low_coverage.20121211.bam
10521	NA19909.mapped.ILLUMINA.bwa.ASW.low_coverage.20120522.bam	NA19909	1	ALL	BAM	0.00437	0.00415	1675632	5.73	0.50302	0.0002	0.50533	0.00053	5.76	0.9915	ASW.omni_wg_2141_filtered.vcf.gz	PASS	2013-05-17 10:22:11	/nfs/1000g-archive/vol1/ftp/data/NA19909/alignment/NA19909.mapped.ILLUMINA.bwa.ASW.low_coverage.20120522.bam		NA19909.mapped.ILLUMINA.bwa.ASW.low_coverage.20120522.bam
7123	HG01204.mapped.ILLUMINA.bwa.PUR.low_coverage.20120522.bam	HG01204	1	ALL	BAM	0.00436	0.00453	1558284	5.23	0.50225	0.00045	0.5019	0.00039	5.238	0.9986	PUR.omni_wg_2141_filtered.vcf.gz	PASS	2013-05-17 07:50:48	/nfs/1000g-archive/vol1/ftp/data/HG01204/alignment/HG01204.mapped.ILLUMINA.bwa.PUR.low_coverage.20120522.bam		HG01204.mapped.ILLUMINA.bwa.PUR.low_coverage.20120522.bam
40259	HG03888.mapped.ILLUMINA.bwa.STU.low_coverage.20130415.bam	HG03888	1	ALL	BAM	0.00436	0.00433	779732	9.42	0.50181	0.00027	0.50203	0.00029	9.466	0.9939	STU.wgs.coriell_phase3_samples.20121126.snps.affy_6.genotypes.vcf.gz	PASS	2013-05-10 08:33:25	/nfs/1000g-archive/vol1/ftp/data/HG03888/alignment/HG03888.mapped.ILLUMINA.bwa.STU.low_coverage.20130415.bam		HG03888.mapped.ILLUMINA.bwa.STU.low_coverage.20130415.bam
16640	HG00451.mapped.ILLUMINA.bwa.CHS.low_coverage.20130415.bam	HG00451	1	ALL	BAM	0.00436	0	662328	7.68	0.50117	0.00023	0	0	0	0	CHS.wgs.coriell_phase3_samples.20121126.snps.affy_6.genotypes.vcf.gz	PASS	2013-04-30 19:16:29	/nfs/1000g-archive/vol1/ftp/data/HG00451/alignment/HG00451.mapped.ILLUMINA.bwa.CHS.low_coverage.20130415.bam		HG00451.mapped.ILLUMINA.bwa.CHS.low_coverage.20130415.bam
8463	HG00637.mapped.ILLUMINA.bwa.PUR.low_coverage.20120522.bam	HG00637	1	ALL	BAM	0.00436	0	854341	3.19	0.5041	0.00194	0	0	0	0	PUR.wgs.coriell_phase3_samples.20121126.snps.affy_6.genotypes.vcf.gz	PASS	2013-05-16 12:25:27	/nfs/1000g-archive/vol1/ftp/data/HG00637/alignment/HG00637.mapped.ILLUMINA.bwa.PUR.low_coverage.20120522.bam		HG00637.mapped.ILLUMINA.bwa.PUR.low_coverage.20120522.bam
12588	HG02678.mapped.ILLUMINA.bwa.GWD.low_coverage.20121211.bam	HG02678	1	ALL	BAM	0.00436	0	1753219	9.3	0.49984	0.00038	0	0	0	0	ALL.omni_wg_2141_filtered.vcf.gz	PASS	2013-05-16 20:02:06	/nfs/1000g-archive/vol1/ftp/data/HG02678/alignment/HG02678.mapped.ILLUMINA.bwa.GWD.low_coverage.20121211.bam		HG02678.mapped.ILLUMINA.bwa.GWD.low_coverage.20121211.bam
28211	NA07056.mapped.ILLUMINA.bwa.CEU.low_coverage.20130415.bam	NA07056	1	ALL	BAM	0.00435	0.00447	1400785	5.3	0.50169	0.00046	0.5022	0.00047	5.307	0.9986	CEU.omni_wg_2141_filtered.vcf.gz	PASS	2013-05-05 11:22:58	/nfs/1000g-archive/vol1/ftp/data/NA07056/alignment/NA07056.mapped.ILLUMINA.bwa.CEU.low_coverage.20130415.bam		NA07056.mapped.ILLUMINA.bwa.CEU.low_coverage.20130415.bam
8503	HG01492.mapped.ILLUMINA.bwa.CLM.low_coverage.20120522.bam	HG01492	1	ALL	BAM	0.00435	0.00432	1493063	5.21	0.50187	0.00047	0.50184	0.00045	5.213	1.0008	CLM.omni_wg_2141_filtered.vcf.gz	PASS	2013-05-16 16:52:54	/nfs/1000g-archive/vol1/ftp/data/HG01492/alignment/HG01492.mapped.ILLUMINA.bwa.CLM.low_coverage.20120522.bam		HG01492.mapped.ILLUMINA.bwa.CLM.low_coverage.20120522.bam
13154	NA18874.mapped.ILLUMINA.bwa.YRI.low_coverage.20120522.bam	NA18874	1	ALL	BAM	0.00435	0	887456	5.72	0.50097	0.00033	0	0	0	0	ALL.wgs.coriell_phase3_samples.20121126.snps.affy_6.genotypes.vcf.gz	PASS	2013-05-16 13:21:09	/nfs/1000g-archive/vol1/ftp/data/NA18874/alignment/NA18874.mapped.ILLUMINA.bwa.YRI.low_coverage.20120522.bam		NA18874.mapped.ILLUMINA.bwa.YRI.low_coverage.20120522.bam
12002	NA19792.mapped.ILLUMINA.bwa.MXL.low_coverage.20121211.bam	NA19792	1	ALL	BAM	0.00435	0	1437703	8.9	0.50206	0.00056	0	0	0	0	MXL.omni_wg_2141_filtered.vcf.gz	PASS	2013-05-17 12:54:35	/nfs/1000g-archive/vol1/ftp/data/NA19792/alignment/NA19792.mapped.ILLUMINA.bwa.MXL.low_coverage.20121211.bam		NA19792.mapped.ILLUMINA.bwa.MXL.low_coverage.20121211.bam
31929	NA20355.mapped.ILLUMINA.bwa.ASW.low_coverage.20130415.bam	NA20355	1	ALL	BAM	0.00434	0.00062	718973	5.88	0.50047	5e-05	0.50058	7e-05	5.883	1.0005	ASW.wgs.coriell_phase3_samples.20121126.snps.affy_6.genotypes.vcf.gz	PASS	2013-05-08 01:33:50	/nfs/1000g-archive/vol1/ftp/data/NA20355/alignment/NA20355.mapped.ILLUMINA.bwa.ASW.low_coverage.20130415.bam		NA20355.mapped.ILLUMINA.bwa.ASW.low_coverage.20130415.bam
64048	HG02922.mapped.ILLUMINA.bwa.ESN.low_coverage.20130415.bam	HG02922	1	ALL	BAM	0.00434	0	1753219	9.17	0.49977	0.00039	0	0	0	0	ALL.omni_wg_2141_filtered.vcf.gz	PASS	2013-05-14 08:13:55	/nfs/1000g-archive/vol1/ftp/data/HG02922/alignment/HG02922.mapped.ILLUMINA.bwa.ESN.low_coverage.20130415.bam		HG02922.mapped.ILLUMINA.bwa.ESN.low_coverage.20130415.bam
12573	NA19019.mapped.ILLUMINA.bwa.LWK.low_coverage.20121211.bam	NA19019	1	ALL	BAM	0.00434	0	1570264	8.9	0.50214	0.00042	0	0	0	0	LWK.omni_wg_2141_filtered.vcf.gz	PASS	2013-05-17 08:23:21	/nfs/1000g-archive/vol1/ftp/data/NA19019/alignment/NA19019.mapped.ILLUMINA.bwa.LWK.low_coverage.20121211.bam		NA19019.mapped.ILLUMINA.bwa.LWK.low_coverage.20121211.bam
25155	HG03854.mapped.ILLUMINA.bwa.STU.low_coverage.20130415.bam	HG03854	1	ALL	BAM	0.00433	0.00599	779732	6.88	0.50111	0.00014	0.50179	0.00017	6.856	1.0213	STU.wgs.coriell_phase3_samples.20121126.snps.affy_6.genotypes.vcf.gz	PASS	2013-05-05 05:43:48	/nfs/1000g-archive/vol1/ftp/data/HG03854/alignment/HG03854.mapped.ILLUMINA.bwa.STU.low_coverage.20130415.bam		HG03854.mapped.ILLUMINA.bwa.STU.low_coverage.20130415.bam
61960	HG03451.mapped.ILLUMINA.bwa.MSL.low_coverage.20130415.bam	HG03451	1	ALL	BAM	0.00433	0.00449	838168	10.43	0.50073	0.0001	0.50129	0.00016	10.407	1.0217	MSL.wgs.coriell_phase3_samples.20121126.snps.affy_6.genotypes.vcf.gz	PASS	2013-05-14 05:07:05	/nfs/1000g-archive/vol1/ftp/data/HG03451/alignment/HG03451.mapped.ILLUMINA.bwa.MSL.low_coverage.20130415.bam		HG03451.mapped.ILLUMINA.bwa.MSL.low_coverage.20130415.bam
44484	HG03722.mapped.ILLUMINA.bwa.ITU.low_coverage.20130415.bam	HG03722	1	ALL	BAM	0.00432	0.00446	781365	11.74	0.50115	0.00017	0.50161	0.00021	11.759	0.9977	ITU.wgs.coriell_phase3_samples.20121126.snps.affy_6.genotypes.vcf.gz	PASS	2013-05-10 12:33:32	/nfs/1000g-archive/vol1/ftp/data/HG03722/alignment/HG03722.mapped.ILLUMINA.bwa.ITU.low_coverage.20130415.bam		HG03722.mapped.ILLUMINA.bwa.ITU.low_coverage.20130415.bam
13023	HG02611.mapped.ILLUMINA.bwa.GWD.low_coverage.20121211.bam	HG02611	1	ALL	BAM	0.00432	0.00429	840560	11.33	0.50086	0.00049	0.50133	0.00047	11.338	0.9995	GWD.wgs.coriell_phase3_samples.20121126.snps.affy_6.genotypes.vcf.gz	PASS	2013-05-16 20:10:32	/nfs/1000g-archive/vol1/ftp/data/HG02611/alignment/HG02611.mapped.ILLUMINA.bwa.GWD.low_coverage.20121211.bam		HG02611.mapped.ILLUMINA.bwa.GWD.low_coverage.20121211.bam
12115	HG03805.mapped.ILLUMINA.bwa.BEB.low_coverage.20121211.bam	HG03805	1	ALL	BAM	0.00431	0.00312	783628	2.85	0.49974	0.00021	0.49977	0.00013	2.857	0.9993	BEB.wgs.coriell_phase3_samples.20121126.snps.affy_6.genotypes.vcf.gz	PASS	2013-05-16 17:58:07	/nfs/1000g-archive/vol1/ftp/data/HG03805/alignment/HG03805.mapped.ILLUMINA.bwa.BEB.low_coverage.20121211.bam		HG03805.mapped.ILLUMINA.bwa.BEB.low_coverage.20121211.bam
12232	HG02811.mapped.ILLUMINA.bwa.GWD.low_coverage.20121211.bam	HG02811	1	ALL	BAM	0.00431	0	1753219	12.57	0.50121	0.00047	0	0	0	0	ALL.omni_wg_2141_filtered.vcf.gz	PASS	2013-05-16 18:25:52	/nfs/1000g-archive/vol1/ftp/data/HG02811/alignment/HG02811.mapped.ILLUMINA.bwa.GWD.low_coverage.20121211.bam		HG02811.mapped.ILLUMINA.bwa.GWD.low_coverage.20121211.bam
35537	NA19437.mapped.ILLUMINA.bwa.LWK.low_coverage.20130415.bam	NA19437	1	ALL	BAM	0.0043	0.00425	1570264	6.23	0.50182	0.00088	0.50232	0.00095	6.24	0.9977	LWK.omni_wg_2141_filtered.vcf.gz	PASS	2013-05-08 08:45:36	/nfs/1000g-archive/vol1/ftp/data/NA19437/alignment/NA19437.mapped.ILLUMINA.bwa.LWK.low_coverage.20130415.bam		NA19437.mapped.ILLUMINA.bwa.LWK.low_coverage.20130415.bam
28003	HG03943.mapped.ILLUMINA.bwa.STU.low_coverage.20130415.bam	HG03943	1	ALL	BAM	0.00429	0.0046	779732	10.27	0.50048	0.00021	0.50103	0.00021	10.239	1.021	STU.wgs.coriell_phase3_samples.20121126.snps.affy_6.genotypes.vcf.gz	PASS	2013-05-05 11:12:53	/nfs/1000g-archive/vol1/ftp/data/HG03943/alignment/HG03943.mapped.ILLUMINA.bwa.STU.low_coverage.20130415.bam		HG03943.mapped.ILLUMINA.bwa.STU.low_coverage.20130415.bam
15508	HG02170.mapped.ILLUMINA.bwa.CDX.low_coverage.20130415.bam	HG02170	0	ALL	BAM	0.00429	0.00129	665690	4.74	0.50004	0.00018	0.5006	0.00024	4.749	0.9983	CDX.wgs.coriell_phase3_samples.20121126.snps.affy_6.genotypes.vcf.gz	PASS	2013-04-30 17:50:06	/nfs/1000g-archive/vol1/ftp/data/HG02170/alignment/HG02170.mapped.ILLUMINA.bwa.CDX.low_coverage.20130415.bam		HG02170.mapped.ILLUMINA.bwa.CDX.low_coverage.20130415.bam
21710	HG03297.mapped.ILLUMINA.bwa.ESN.low_coverage.20130415.bam	HG03297	1	ALL	BAM	0.00429	0	1753219	7.96	0.49959	0.00044	0	0	0	0	ALL.omni_wg_2141_filtered.vcf.gz	PASS	2013-05-03 08:09:51	/nfs/1000g-archive/vol1/ftp/data/HG03297/alignment/HG03297.mapped.ILLUMINA.bwa.ESN.low_coverage.20130415.bam		HG03297.mapped.ILLUMINA.bwa.ESN.low_coverage.20130415.bam
9551	NA19904.mapped.ILLUMINA.bwa.ASW.low_coverage.20120522.bam	NA19904	1	ALL	BAM	0.00429	0	718973	8.35	0.504	0.00131	0	0	0	0	ASW.wgs.coriell_phase3_samples.20121126.snps.affy_6.genotypes.vcf.gz	PASS	2013-05-16 07:36:04	/nfs/1000g-archive/vol1/ftp/data/NA19904/alignment/NA19904.mapped.ILLUMINA.bwa.ASW.low_coverage.20120522.bam		NA19904.mapped.ILLUMINA.bwa.ASW.low_coverage.20120522.bam
35822	NA20525.mapped.ILLUMINA.bwa.TSI.low_coverage.20130415.bam	NA20525	1	ALL	BAM	0.00429	0	887456	7.49	0.50184	0.00034	0	0	0	0	ALL.wgs.coriell_phase3_samples.20121126.snps.affy_6.genotypes.vcf.gz	PASS	2013-05-08 23:42:25	/nfs/1000g-archive/vol1/ftp/data/NA20525/alignment/NA20525.mapped.ILLUMINA.bwa.TSI.low_coverage.20130415.bam		NA20525.mapped.ILLUMINA.bwa.TSI.low_coverage.20130415.bam
26945	HG04229.mapped.ILLUMINA.bwa.STU.low_coverage.20130415.bam	HG04229	1	ALL	BAM	0.00428	0.00483	779732	8.45	0.50055	4e-05	0.50088	4e-05	8.414	1.0236	STU.wgs.coriell_phase3_samples.20121126.snps.affy_6.genotypes.vcf.gz	PASS	2013-05-05 08:41:59	/nfs/1000g-archive/vol1/ftp/data/HG04229/alignment/HG04229.mapped.ILLUMINA.bwa.STU.low_coverage.20130415.bam		HG04229.mapped.ILLUMINA.bwa.STU.low_coverage.20130415.bam
13177	HG02687.mapped.ILLUMINA.bwa.PJL.low_coverage.20121211.bam	HG02687	1	ALL	BAM	0.00428	0.00465	781539	9.47	0.50115	0.00026	0.50098	0.00028	9.436	1.0224	PJL.wgs.coriell_phase3_samples.20121126.snps.affy_6.genotypes.vcf.gz	PASS	2013-05-17 00:26:45	/nfs/1000g-archive/vol1/ftp/data/HG02687/alignment/HG02687.mapped.ILLUMINA.bwa.PJL.low_coverage.20121211.bam		HG02687.mapped.ILLUMINA.bwa.PJL.low_coverage.20121211.bam
12400	HG00674.mapped.ILLUMINA.bwa.CHS.low_coverage.20121211.bam	HG00674	1	ALL	BAM	0.00428	0.00435	662328	8.81	0.50122	0.00058	0.50128	0.00056	8.77	1.0239	CHS.wgs.coriell_phase3_samples.20121126.snps.affy_6.genotypes.vcf.gz	PASS	2013-05-16 13:33:26	/nfs/1000g-archive/vol1/ftp/data/HG00674/alignment/HG00674.mapped.ILLUMINA.bwa.CHS.low_coverage.20121211.bam		HG00674.mapped.ILLUMINA.bwa.CHS.low_coverage.20121211.bam
58448	HG02676.mapped.ILLUMINA.bwa.GWD.low_coverage.20130415.bam	HG02676	1	ALL	BAM	0.00428	0.00426	840560	9.65	0.50143	0.00039	0.50152	0.0004	9.663	0.9977	GWD.wgs.coriell_phase3_samples.20121126.snps.affy_6.genotypes.vcf.gz	PASS	2013-05-14 02:56:20	/nfs/1000g-archive/vol1/ftp/data/HG02676/alignment/HG02676.mapped.ILLUMINA.bwa.GWD.low_coverage.20130415.bam		HG02676.mapped.ILLUMINA.bwa.GWD.low_coverage.20130415.bam
49266	NA20818.mapped.ILLUMINA.bwa.TSI.low_coverage.20130415.bam	NA20818	1	ALL	BAM	0.00428	0.00426	1402149	6.65	0.50093	0.00035	0.50109	0.00028	6.652	0.9993	TSI.omni_wg_2141_filtered.vcf.gz	PASS	2013-05-10 20:44:41	/nfs/1000g-archive/vol1/ftp/data/NA20818/alignment/NA20818.mapped.ILLUMINA.bwa.TSI.low_coverage.20130415.bam		NA20818.mapped.ILLUMINA.bwa.TSI.low_coverage.20130415.bam
8402	HG01945.mapped.ILLUMINA.bwa.PEL.low_coverage.20120522.bam	HG01945	1	ALL	BAM	0.00428	0.00366	1304517	6.7	0.50178	0.00049	0.50159	0.00057	6.716	0.9994	PEL.omni_wg_2141_filtered.vcf.gz	PASS	2013-05-17 12:43:51	/nfs/1000g-archive/vol1/ftp/data/HG01945/alignment/HG01945.mapped.ILLUMINA.bwa.PEL.low_coverage.20120522.bam		HG01945.mapped.ILLUMINA.bwa.PEL.low_coverage.20120522.bam
22679	HG03642.mapped.ILLUMINA.bwa.STU.low_coverage.20130415.bam	HG03642	1	ALL	BAM	0.00428	0	1753219	10.56	0.50158	0.00018	0	0	0	0	ALL.omni_wg_2141_filtered.vcf.gz	PASS	2013-05-03 10:55:00	/nfs/1000g-archive/vol1/ftp/data/HG03642/alignment/HG03642.mapped.ILLUMINA.bwa.STU.low_coverage.20130415.bam		HG03642.mapped.ILLUMINA.bwa.STU.low_coverage.20130415.bam
13151	HG02642.mapped.ILLUMINA.bwa.GWD.low_coverage.20121211.bam	HG02642	1	ALL	BAM	0.00427	0.00497	840560	7.96	0.50078	0.00035	0.50122	0.0004	7.936	1.0237	GWD.wgs.coriell_phase3_samples.20121126.snps.affy_6.genotypes.vcf.gz	PASS	2013-05-16 18:04:10	/nfs/1000g-archive/vol1/ftp/data/HG02642/alignment/HG02642.mapped.ILLUMINA.bwa.GWD.low_coverage.20121211.bam		HG02642.mapped.ILLUMINA.bwa.GWD.low_coverage.20121211.bam
9338	HG02061.mapped.ILLUMINA.bwa.KHV.low_coverage.20120522.bam	HG02061	1	ALL	BAM	0.00427	0.00423	1241587	6.42	0.50172	0.00054	0.50113	0.00069	6.427	0.9995	KHV.omni_wg_2141_filtered.vcf.gz	PASS	2013-05-17 07:18:51	/nfs/1000g-archive/vol1/ftp/data/HG02061/alignment/HG02061.mapped.ILLUMINA.bwa.KHV.low_coverage.20120522.bam		HG02061.mapped.ILLUMINA.bwa.KHV.low_coverage.20120522.bam
9612	HG00174.mapped.ILLUMINA.bwa.FIN.low_coverage.20120522.bam	HG00174	1	ALL	BAM	0.00427	0.00335	1385013	3.49	0.50275	0.00041	0.50255	0.00053	3.497	0.9998	FIN.omni_wg_2141_filtered.vcf.gz	PASS	2013-05-17 00:43:15	/nfs/1000g-archive/vol1/ftp/data/HG00174/alignment/HG00174.mapped.ILLUMINA.bwa.FIN.low_coverage.20120522.bam		HG00174.mapped.ILLUMINA.bwa.FIN.low_coverage.20120522.bam
12531	HG02655.mapped.ILLUMINA.bwa.PJL.low_coverage.20121211.bam	HG02655	1	ALL	BAM	0.00426	0.00506	781539	8.64	0.50038	0.00031	0.50118	0.00033	8.662	0.9979	PJL.wgs.coriell_phase3_samples.20121126.snps.affy_6.genotypes.vcf.gz	PASS	2013-05-16 18:38:19	/nfs/1000g-archive/vol1/ftp/data/HG02655/alignment/HG02655.mapped.ILLUMINA.bwa.PJL.low_coverage.20121211.bam		HG02655.mapped.ILLUMINA.bwa.PJL.low_coverage.20121211.bam
7063	HG01359.mapped.ILLUMINA.bwa.CLM.low_coverage.20120522.bam	HG01359	1	ALL	BAM	0.00424	0.00447	1493063	5.02	0.50264	0.00044	0.5022	0.00047	5.032	0.998	CLM.omni_wg_2141_filtered.vcf.gz	PASS	2013-05-16 19:38:18	/nfs/1000g-archive/vol1/ftp/data/HG01359/alignment/HG01359.mapped.ILLUMINA.bwa.CLM.low_coverage.20120522.bam		HG01359.mapped.ILLUMINA.bwa.CLM.low_coverage.20120522.bam
12474	HG00631.mapped.ILLUMINA.bwa.CHS.low_coverage.20121211.bam	HG00631	1	ALL	BAM	0.00424	0	1243376	9.41	0.50147	0.00073	0	0	0	0	CHS.omni_wg_2141_filtered.vcf.gz	PASS	2013-05-17 15:14:10	/nfs/1000g-archive/vol1/ftp/data/HG00631/alignment/HG00631.mapped.ILLUMINA.bwa.CHS.low_coverage.20121211.bam		HG00631.mapped.ILLUMINA.bwa.CHS.low_coverage.20121211.bam
36053	NA20516.mapped.ILLUMINA.bwa.TSI.low_coverage.20130415.bam	NA20516	1	ALL	BAM	0.00423	0.00426	1402149	7.45	0.50265	0.00031	0.50286	0.0004	7.459	0.9995	TSI.omni_wg_2141_filtered.vcf.gz	PASS	2013-05-09 02:25:25	/nfs/1000g-archive/vol1/ftp/data/NA20516/alignment/NA20516.mapped.ILLUMINA.bwa.TSI.low_coverage.20130415.bam		NA20516.mapped.ILLUMINA.bwa.TSI.low_coverage.20130415.bam
58956	HG02943.mapped.ILLUMINA.bwa.ESN.low_coverage.20130415.bam	HG02943	1	ALL	BAM	0.00423	0.00421	835395	8.19	0.50131	0.00036	0.50145	0.00043	8.21	0.998	ESN.wgs.coriell_phase3_samples.20121126.snps.affy_6.genotypes.vcf.gz	PASS	2013-05-14 03:13:31	/nfs/1000g-archive/vol1/ftp/data/HG02943/alignment/HG02943.mapped.ILLUMINA.bwa.ESN.low_coverage.20130415.bam		HG02943.mapped.ILLUMINA.bwa.ESN.low_coverage.20130415.bam
48069	NA11918.mapped.ILLUMINA.bwa.CEU.low_coverage.20130415.bam	NA11918	1	ALL	BAM	0.00423	0.00402	1400785	8.21	0.50207	0.00046	0.50312	0.00064	8.231	0.9966	CEU.omni_wg_2141_filtered.vcf.gz	PASS	2013-05-10 19:28:19	/nfs/1000g-archive/vol1/ftp/data/NA11918/alignment/NA11918.mapped.ILLUMINA.bwa.CEU.low_coverage.20130415.bam		NA11918.mapped.ILLUMINA.bwa.CEU.low_coverage.20130415.bam
16804	HG01284.mapped.ILLUMINA.bwa.CLM.low_coverage.20130415.bam	HG01284	1	ALL	BAM	0.00423	0	1493063	8.15	0.50132	0.0002	0	0	0	0	CLM.omni_wg_2141_filtered.vcf.gz	PASS	2013-04-30 19:29:32	/nfs/1000g-archive/vol1/ftp/data/HG01284/alignment/HG01284.mapped.ILLUMINA.bwa.CLM.low_coverage.20130415.bam		HG01284.mapped.ILLUMINA.bwa.CLM.low_coverage.20130415.bam
27001	HG03799.mapped.ILLUMINA.bwa.BEB.low_coverage.20130415.bam	HG03799	0	ALL	BAM	0.00422	0.99807	783628	13.07	0.50234	0.00052	0.50397	0.00094	13.12	0.9951	BEB.wgs.coriell_phase3_samples.20121126.snps.affy_6.genotypes.vcf.gz	POSSIBLE_SWAP	2013-05-05 08:51:17	/nfs/1000g-archive/vol1/ftp/data/HG03799/alignment/HG03799.mapped.ILLUMINA.bwa.BEB.low_coverage.20130415.bam		HG03799.mapped.ILLUMINA.bwa.BEB.low_coverage.20130415.bam
10573	HG01197.mapped.ILLUMINA.bwa.PUR.low_coverage.20120522.bam	HG01197	1	ALL	BAM	0.00422	0.00454	1558284	5.76	0.50229	0.00016	0.50225	0.00037	5.782	0.993	PUR.omni_wg_2141_filtered.vcf.gz	PASS	2013-05-17 09:51:40	/nfs/1000g-archive/vol1/ftp/data/HG01197/alignment/HG01197.mapped.ILLUMINA.bwa.PUR.low_coverage.20120522.bam		HG01197.mapped.ILLUMINA.bwa.PUR.low_coverage.20120522.bam
50382	NA20783.mapped.ILLUMINA.bwa.TSI.low_coverage.20130415.bam	NA20783	1	ALL	BAM	0.00422	0.00425	1402149	6.16	0.50205	0.00045	0.50261	0.00045	6.167	0.9996	TSI.omni_wg_2141_filtered.vcf.gz	PASS	2013-05-10 23:16:37	/nfs/1000g-archive/vol1/ftp/data/NA20783/alignment/NA20783.mapped.ILLUMINA.bwa.TSI.low_coverage.20130415.bam		NA20783.mapped.ILLUMINA.bwa.TSI.low_coverage.20130415.bam
16957	HG01119.mapped.ILLUMINA.bwa.CLM.low_coverage.20130415.bam	HG01119	1	ALL	BAM	0.00422	0	1493063	7.72	0.50146	0.00023	0	0	0	0	CLM.omni_wg_2141_filtered.vcf.gz	PASS	2013-04-30 19:43:46	/nfs/1000g-archive/vol1/ftp/data/HG01119/alignment/HG01119.mapped.ILLUMINA.bwa.CLM.low_coverage.20130415.bam		HG01119.mapped.ILLUMINA.bwa.CLM.low_coverage.20130415.bam
17353	HG01765.mapped.ILLUMINA.bwa.IBS.low_coverage.20130415.bam	HG01765	1	ALL	BAM	0.00422	0	1400201	8.3	0.50112	0.00028	0	0	0	0	IBS.omni_wg_2141_filtered.vcf.gz	PASS	2013-04-30 20:32:29	/nfs/1000g-archive/vol1/ftp/data/HG01765/alignment/HG01765.mapped.ILLUMINA.bwa.IBS.low_coverage.20130415.bam		HG01765.mapped.ILLUMINA.bwa.IBS.low_coverage.20130415.bam
12693	NA21124.mapped.ILLUMINA.bwa.GIH.low_coverage.20121211.bam	NA21124	1	ALL	BAM	0.00422	0	1368816	7.77	0.50179	0.00057	0	0	0	0	GIH.omni_wg_2141_filtered.vcf.gz	PASS	2013-05-17 14:35:50	/nfs/1000g-archive/vol1/ftp/data/NA21124/alignment/NA21124.mapped.ILLUMINA.bwa.GIH.low_coverage.20121211.bam		NA21124.mapped.ILLUMINA.bwa.GIH.low_coverage.20121211.bam
12507	HG02601.mapped.ILLUMINA.bwa.PJL.low_coverage.20121211.bam	HG02601	1	ALL	BAM	0.00421	0	1753219	9.48	0.50196	0.00032	0	0	0	0	ALL.omni_wg_2141_filtered.vcf.gz	PASS	2013-05-17 04:04:14	/nfs/1000g-archive/vol1/ftp/data/HG02601/alignment/HG02601.mapped.ILLUMINA.bwa.PJL.low_coverage.20121211.bam		HG02601.mapped.ILLUMINA.bwa.PJL.low_coverage.20121211.bam
25210	HG03929.mapped.ILLUMINA.bwa.BEB.low_coverage.20130415.bam	HG03929	0	ALL	BAM	0.0042	0.00582	783628	4.46	0.50118	0.00032	0.51473	0.00014	4.443	1.0219	BEB.wgs.coriell_phase3_samples.20121126.snps.affy_6.genotypes.vcf.gz	PASS	2013-05-05 05:47:41	/nfs/1000g-archive/vol1/ftp/data/HG03929/alignment/HG03929.mapped.ILLUMINA.bwa.BEB.low_coverage.20130415.bam		HG03929.mapped.ILLUMINA.bwa.BEB.low_coverage.20130415.bam
13029	HG03052.mapped.ILLUMINA.bwa.MSL.low_coverage.20121211.bam	HG03052	1	ALL	BAM	0.0042	0.00423	838168	9.73	0.50096	0.00016	0.50082	0.00015	9.765	0.9963	MSL.wgs.coriell_phase3_samples.20121126.snps.affy_6.genotypes.vcf.gz	PASS	2013-05-16 20:35:24	/nfs/1000g-archive/vol1/ftp/data/HG03052/alignment/HG03052.mapped.ILLUMINA.bwa.MSL.low_coverage.20121211.bam		HG03052.mapped.ILLUMINA.bwa.MSL.low_coverage.20121211.bam
60600	HG03124.mapped.ILLUMINA.bwa.ESN.low_coverage.20130415.bam	HG03124	1	ALL	BAM	0.00419	0.00443	835395	9.18	0.50084	0.00026	0.50159	0.00031	9.142	1.0254	ESN.wgs.coriell_phase3_samples.20121126.snps.affy_6.genotypes.vcf.gz	PASS	2013-05-14 04:28:21	/nfs/1000g-archive/vol1/ftp/data/HG03124/alignment/HG03124.mapped.ILLUMINA.bwa.ESN.low_coverage.20130415.bam		HG03124.mapped.ILLUMINA.bwa.ESN.low_coverage.20130415.bam
56506	HG02571.mapped.ILLUMINA.bwa.GWD.low_coverage.20130415.bam	HG02571	1	ALL	BAM	0.00419	0.00426	840560	9.99	0.50128	9e-05	0.50111	0.0001	10.013	0.9972	GWD.wgs.coriell_phase3_samples.20121126.snps.affy_6.genotypes.vcf.gz	PASS	2013-05-14 01:29:31	/nfs/1000g-archive/vol1/ftp/data/HG02571/alignment/HG02571.mapped.ILLUMINA.bwa.GWD.low_coverage.20130415.bam		HG02571.mapped.ILLUMINA.bwa.GWD.low_coverage.20130415.bam
12198	HG02687.mapped.ILLUMINA.bwa.PJL.low_coverage.20121211.bam	HG02687	1	ALL	BAM	0.00419	0	1753219	9.4	0.50128	0.00022	0	0	0	0	ALL.omni_wg_2141_filtered.vcf.gz	PASS	2013-05-17 14:53:00	/nfs/1000g-archive/vol1/ftp/data/HG02687/alignment/HG02687.mapped.ILLUMINA.bwa.PJL.low_coverage.20121211.bam		HG02687.mapped.ILLUMINA.bwa.PJL.low_coverage.20121211.bam
8638	NA20889.mapped.ILLUMINA.bwa.GIH.low_coverage.20120522.bam	NA20889	1	ALL	BAM	0.00418	0.00386	1368816	6.14	0.50302	0.00056	0.50311	0.00057	6.148	0.9997	GIH.omni_wg_2141_filtered.vcf.gz	PASS	2013-05-16 20:10:04	/nfs/1000g-archive/vol1/ftp/data/NA20889/alignment/NA20889.mapped.ILLUMINA.bwa.GIH.low_coverage.20120522.bam		NA20889.mapped.ILLUMINA.bwa.GIH.low_coverage.20120522.bam
12407	NA19026.mapped.ILLUMINA.bwa.LWK.low_coverage.20121211.bam	NA19026	1	ALL	BAM	0.00418	0	1570264	8.54	0.50081	0.00039	0	0	0	0	LWK.omni_wg_2141_filtered.vcf.gz	PASS	2013-05-17 06:06:36	/nfs/1000g-archive/vol1/ftp/data/NA19026/alignment/NA19026.mapped.ILLUMINA.bwa.LWK.low_coverage.20121211.bam		NA19026.mapped.ILLUMINA.bwa.LWK.low_coverage.20121211.bam
10437	HG01101.mapped.ILLUMINA.bwa.PUR.low_coverage.20120522.bam	HG01101	1	ALL	BAM	0.00417	0.00423	1558284	11.06	0.49993	0.00012	0.50132	0.00016	11.094	0.9935	PUR.omni_wg_2141_filtered.vcf.gz	PASS	2013-05-16 21:29:10	/nfs/1000g-archive/vol1/ftp/data/HG01101/alignment/HG01101.mapped.ILLUMINA.bwa.PUR.low_coverage.20120522.bam		HG01101.mapped.ILLUMINA.bwa.PUR.low_coverage.20120522.bam
49716	NA18523.mapped.ILLUMINA.bwa.YRI.low_coverage.20130415.bam	NA18523	1	ALL	BAM	0.00417	0.00413	1559108	5.65	0.50248	0.00067	0.50248	0.00078	5.656	1.0015	YRI.omni_wg_2141_filtered.vcf.gz	PASS	2013-05-10 21:12:39	/nfs/1000g-archive/vol1/ftp/data/NA18523/alignment/NA18523.mapped.ILLUMINA.bwa.YRI.low_coverage.20130415.bam		NA18523.mapped.ILLUMINA.bwa.YRI.low_coverage.20130415.bam
10570	NA12154.mapped.ILLUMINA.bwa.CEU.low_coverage.20120522.bam	NA12154	1	ALL	BAM	0.00416	0.00441	1400785	9.23	0.502	0.00031	0.5027	0.00027	9.252	0.998	CEU.omni_wg_2141_filtered.vcf.gz	PASS	2013-05-17 01:24:54	/nfs/1000g-archive/vol1/ftp/data/NA12154/alignment/NA12154.mapped.ILLUMINA.bwa.CEU.low_coverage.20120522.bam		NA12154.mapped.ILLUMINA.bwa.CEU.low_coverage.20120522.bam
40609	HG03793.mapped.ILLUMINA.bwa.BEB.low_coverage.20130415.bam	HG03793	1	ALL	BAM	0.00416	0.00412	783628	8.66	0.50219	0.00025	0.50173	0.00028	8.703	0.9946	BEB.wgs.coriell_phase3_samples.20121126.snps.affy_6.genotypes.vcf.gz	PASS	2013-05-10 09:07:10	/nfs/1000g-archive/vol1/ftp/data/HG03793/alignment/HG03793.mapped.ILLUMINA.bwa.BEB.low_coverage.20130415.bam		HG03793.mapped.ILLUMINA.bwa.BEB.low_coverage.20130415.bam
21530	HG03508.mapped.ILLUMINA.bwa.ESN.low_coverage.20130415.bam	HG03508	0	ALL	BAM	0.00416	0	1753219	9.6	0.49925	0.00031	0	0	0	0	ALL.omni_wg_2141_filtered.vcf.gz	PASS	2013-05-03 07:40:59	/nfs/1000g-archive/vol1/ftp/data/HG03508/alignment/HG03508.mapped.ILLUMINA.bwa.ESN.low_coverage.20130415.bam		HG03508.mapped.ILLUMINA.bwa.ESN.low_coverage.20130415.bam
11279	HG02725.mapped.ILLUMINA.bwa.PJL.low_coverage.20121211.bam	HG02725	1	ALL	BAM	0.00415	0	1753219	9.64	0.50107	0.00035	0	0	0	0	ALL.omni_wg_2141_filtered.vcf.gz	PASS	2013-05-17 16:49:38	/nfs/1000g-archive/vol1/ftp/data/HG02725/alignment/HG02725.mapped.ILLUMINA.bwa.PJL.low_coverage.20121211.bam		HG02725.mapped.ILLUMINA.bwa.PJL.low_coverage.20121211.bam
12872	HG02727.mapped.ILLUMINA.bwa.PJL.low_coverage.20121211.bam	HG02727	1	ALL	BAM	0.00414	0.00462	781539	8.02	0.50086	0.0002	0.50145	0.00022	7.987	1.0228	PJL.wgs.coriell_phase3_samples.20121126.snps.affy_6.genotypes.vcf.gz	PASS	2013-05-16 17:07:15	/nfs/1000g-archive/vol1/ftp/data/HG02727/alignment/HG02727.mapped.ILLUMINA.bwa.PJL.low_coverage.20121211.bam		HG02727.mapped.ILLUMINA.bwa.PJL.low_coverage.20121211.bam
9835	NA18960.mapped.ILLUMINA.bwa.JPT.low_coverage.20120522.bam	NA18960	1	ALL	BAM	0.00413	0.00434	1243522	12.81	0.50171	0.00081	0.50274	0.00088	12.829	0.9991	JPT.omni_wg_2141_filtered.vcf.gz	PASS	2013-05-16 22:55:45	/nfs/1000g-archive/vol1/ftp/data/NA18960/alignment/NA18960.mapped.ILLUMINA.bwa.JPT.low_coverage.20120522.bam		NA18960.mapped.ILLUMINA.bwa.JPT.low_coverage.20120522.bam
12239	HG00631.mapped.ILLUMINA.bwa.CHS.low_coverage.20121211.bam	HG00631	1	ALL	BAM	0.00413	0.00424	662328	9.46	0.5014	0.00063	0.50106	0.00057	9.435	1.0212	CHS.wgs.coriell_phase3_samples.20121126.snps.affy_6.genotypes.vcf.gz	PASS	2013-05-16 10:17:04	/nfs/1000g-archive/vol1/ftp/data/HG00631/alignment/HG00631.mapped.ILLUMINA.bwa.CHS.low_coverage.20121211.bam		HG00631.mapped.ILLUMINA.bwa.CHS.low_coverage.20121211.bam
8089	NA19914.mapped.ILLUMINA.bwa.ASW.low_coverage.20120522.bam	NA19914	1	ALL	BAM	0.00413	0.00418	1675632	15.31	0.50175	0.00018	0.50263	0.00017	15.364	0.9952	ASW.omni_wg_2141_filtered.vcf.gz	PASS	2013-05-16 14:36:11	/nfs/1000g-archive/vol1/ftp/data/NA19914/alignment/NA19914.mapped.ILLUMINA.bwa.ASW.low_coverage.20120522.bam		NA19914.mapped.ILLUMINA.bwa.ASW.low_coverage.20120522.bam
26081	HG04144.mapped.ILLUMINA.bwa.BEB.low_coverage.20130415.bam	HG04144	1	ALL	BAM	0.00413	0	1753219	8.15	0.5	0.00016	0	0	0	0	ALL.omni_wg_2141_filtered.vcf.gz	PASS	2013-05-05 07:40:31	/nfs/1000g-archive/vol1/ftp/data/HG04144/alignment/HG04144.mapped.ILLUMINA.bwa.BEB.low_coverage.20130415.bam		HG04144.mapped.ILLUMINA.bwa.BEB.low_coverage.20130415.bam
35650	NA20320.mapped.ILLUMINA.bwa.ASW.low_coverage.20130415.bam	NA20320	1	ALL	BAM	0.00413	0	1675632	7.76	0.50093	0.00022	0	0	0	0	ASW.omni_wg_2141_filtered.vcf.gz	PASS	2013-05-08 21:37:39	/nfs/1000g-archive/vol1/ftp/data/NA20320/alignment/NA20320.mapped.ILLUMINA.bwa.ASW.low_coverage.20130415.bam		NA20320.mapped.ILLUMINA.bwa.ASW.low_coverage.20130415.bam
12210	HG03833.mapped.ILLUMINA.bwa.BEB.low_coverage.20121211.bam	HG03833	1	ALL	BAM	0.00411	0.00528	783628	3.42	0.50216	0.00014	0.5016	9e-05	3.403	1.0225	BEB.wgs.coriell_phase3_samples.20121126.snps.affy_6.genotypes.vcf.gz	PASS	2013-05-16 09:43:56	/nfs/1000g-archive/vol1/ftp/data/HG03833/alignment/HG03833.mapped.ILLUMINA.bwa.BEB.low_coverage.20121211.bam		HG03833.mapped.ILLUMINA.bwa.BEB.low_coverage.20121211.bam
12363	HG00674.mapped.ILLUMINA.bwa.CHS.low_coverage.20121211.bam	HG00674	1	ALL	BAM	0.00411	0	1243376	8.75	0.50196	0.00076	0	0	0	0	CHS.omni_wg_2141_filtered.vcf.gz	PASS	2013-05-17 11:12:35	/nfs/1000g-archive/vol1/ftp/data/HG00674/alignment/HG00674.mapped.ILLUMINA.bwa.CHS.low_coverage.20121211.bam		HG00674.mapped.ILLUMINA.bwa.CHS.low_coverage.20121211.bam
12391	HG00729.mapped.ILLUMINA.bwa.CHS.low_coverage.20121211.bam	HG00729	1	ALL	BAM	0.00411	0	662328	9.78	0.50093	0.0005	0	0	0	0	CHS.wgs.coriell_phase3_samples.20121126.snps.affy_6.genotypes.vcf.gz	PASS	2013-05-16 12:39:10	/nfs/1000g-archive/vol1/ftp/data/HG00729/alignment/HG00729.mapped.ILLUMINA.bwa.CHS.low_coverage.20121211.bam		HG00729.mapped.ILLUMINA.bwa.CHS.low_coverage.20121211.bam
21369	HG03309.mapped.ILLUMINA.bwa.ESN.low_coverage.20130415.bam	HG03309	0	ALL	BAM	0.00411	0	1753219	5.98	0.49784	0.00067	0	0	0	0	ALL.omni_wg_2141_filtered.vcf.gz	PASS	2013-05-03 07:17:29	/nfs/1000g-archive/vol1/ftp/data/HG03309/alignment/HG03309.mapped.ILLUMINA.bwa.ESN.low_coverage.20130415.bam		HG03309.mapped.ILLUMINA.bwa.ESN.low_coverage.20130415.bam
12136	NA19455.mapped.ILLUMINA.bwa.LWK.low_coverage.20120522.bam	NA19455	1	ALL	BAM	0.00411	0	887456	6.01	0.4985	0.00022	0	0	0	0	ALL.wgs.coriell_phase3_samples.20121126.snps.affy_6.genotypes.vcf.gz	PASS	2013-05-16 17:18:22	/nfs/1000g-archive/vol1/ftp/data/NA19455/alignment/NA19455.mapped.ILLUMINA.bwa.LWK.low_coverage.20120522.bam		NA19455.mapped.ILLUMINA.bwa.LWK.low_coverage.20120522.bam
9058	HG01817.mapped.ILLUMINA.bwa.CDX.low_coverage.20120522.bam	HG01817	1	ALL	BAM	0.0041	0.00426	1235978	6.64	0.50129	0.00021	0.50199	0.00026	6.647	1.0016	CDX.omni_wg_2141_filtered.vcf.gz	PASS	2013-05-16 21:03:54	/nfs/1000g-archive/vol1/ftp/data/HG01817/alignment/HG01817.mapped.ILLUMINA.bwa.CDX.low_coverage.20120522.bam		HG01817.mapped.ILLUMINA.bwa.CDX.low_coverage.20120522.bam
20161	HG02731.mapped.ILLUMINA.bwa.PJL.low_coverage.20130415.bam	HG02731	1	ALL	BAM	0.0041	0.00379	781539	3.62	0.50229	0.00054	0.50187	0.00042	3.633	0.9982	PJL.wgs.coriell_phase3_samples.20121126.snps.affy_6.genotypes.vcf.gz	PASS	2013-05-03 04:58:34	/nfs/1000g-archive/vol1/ftp/data/HG02731/alignment/HG02731.mapped.ILLUMINA.bwa.PJL.low_coverage.20130415.bam		HG02731.mapped.ILLUMINA.bwa.PJL.low_coverage.20130415.bam
55284	HG00536.mapped.ILLUMINA.bwa.CHS.low_coverage.20130415.bam	HG00536	1	ALL	BAM	0.0041	0	662328	10.4	0.50086	0.00013	0	0	0	0	CHS.wgs.coriell_phase3_samples.20121126.snps.affy_6.genotypes.vcf.gz	PASS	2013-05-13 22:52:44	/nfs/1000g-archive/vol1/ftp/data/HG00536/alignment/HG00536.mapped.ILLUMINA.bwa.CHS.low_coverage.20130415.bam		HG00536.mapped.ILLUMINA.bwa.CHS.low_coverage.20130415.bam
59035	HG03057.mapped.ILLUMINA.bwa.MSL.low_coverage.20130415.bam	HG03057	1	ALL	BAM	0.00409	0.00453	838168	8.44	0.50083	0.00014	0.50165	0.00015	8.424	1.0226	MSL.wgs.coriell_phase3_samples.20121126.snps.affy_6.genotypes.vcf.gz	PASS	2013-05-14 03:14:36	/nfs/1000g-archive/vol1/ftp/data/HG03057/alignment/HG03057.mapped.ILLUMINA.bwa.MSL.low_coverage.20130415.bam		HG03057.mapped.ILLUMINA.bwa.MSL.low_coverage.20130415.bam
12368	HG02601.mapped.ILLUMINA.bwa.PJL.low_coverage.20121211.bam	HG02601	1	ALL	BAM	0.00409	0.0041	781539	9.75	0.50146	0.00042	0.50147	0.00039	9.774	0.998	PJL.wgs.coriell_phase3_samples.20121126.snps.affy_6.genotypes.vcf.gz	PASS	2013-05-16 18:54:23	/nfs/1000g-archive/vol1/ftp/data/HG02601/alignment/HG02601.mapped.ILLUMINA.bwa.PJL.low_coverage.20121211.bam		HG02601.mapped.ILLUMINA.bwa.PJL.low_coverage.20121211.bam
16007	HG01284.mapped.ILLUMINA.bwa.CLM.low_coverage.20130415.bam	HG01284	1	ALL	BAM	0.00408	0.00402	832763	8.32	0.50045	7e-05	0.50124	9e-05	8.342	0.9961	CLM.wgs.coriell_phase3_samples.20121126.snps.affy_6.genotypes.vcf.gz	PASS	2013-04-30 18:25:23	/nfs/1000g-archive/vol1/ftp/data/HG01284/alignment/HG01284.mapped.ILLUMINA.bwa.CLM.low_coverage.20130415.bam		HG01284.mapped.ILLUMINA.bwa.CLM.low_coverage.20130415.bam
62162	HG03397.mapped.ILLUMINA.bwa.MSL.low_coverage.20130415.bam	HG03397	1	ALL	BAM	0.00408	0	1753219	9.13	0.4996	0.00037	0	0	0	0	ALL.omni_wg_2141_filtered.vcf.gz	PASS	2013-05-14 05:27:22	/nfs/1000g-archive/vol1/ftp/data/HG03397/alignment/HG03397.mapped.ILLUMINA.bwa.MSL.low_coverage.20130415.bam		HG03397.mapped.ILLUMINA.bwa.MSL.low_coverage.20130415.bam
12080	HG02660.mapped.ILLUMINA.bwa.PJL.low_coverage.20121211.bam	HG02660	1	ALL	BAM	0.00407	0.0046	781539	8.31	0.50116	0.00031	0.50092	0.00029	8.285	1.0201	PJL.wgs.coriell_phase3_samples.20121126.snps.affy_6.genotypes.vcf.gz	PASS	2013-05-16 14:59:29	/nfs/1000g-archive/vol1/ftp/data/HG02660/alignment/HG02660.mapped.ILLUMINA.bwa.PJL.low_coverage.20121211.bam		HG02660.mapped.ILLUMINA.bwa.PJL.low_coverage.20121211.bam
7655	HG00146.mapped.ILLUMINA.bwa.GBR.low_coverage.20120522.bam	HG00146	1	ALL	BAM	0.00407	0.00397	1389642	4.68	0.50268	0.00068	0.50198	0.00049	4.684	1.0006	GBR.omni_wg_2141_filtered.vcf.gz	PASS	2013-05-16 11:15:08	/nfs/1000g-archive/vol1/ftp/data/HG00146/alignment/HG00146.mapped.ILLUMINA.bwa.GBR.low_coverage.20120522.bam		HG00146.mapped.ILLUMINA.bwa.GBR.low_coverage.20120522.bam
8703	HG01598.mapped.ILLUMINA.bwa.KHV.low_coverage.20120522.bam	HG01598	1	ALL	BAM	0.00406	0.00403	1241587	4.45	0.50223	0.00049	0.50241	0.00066	4.453	1	KHV.omni_wg_2141_filtered.vcf.gz	PASS	2013-05-17 03:32:33	/nfs/1000g-archive/vol1/ftp/data/HG01598/alignment/HG01598.mapped.ILLUMINA.bwa.KHV.low_coverage.20120522.bam		HG01598.mapped.ILLUMINA.bwa.KHV.low_coverage.20120522.bam
60278	HG02799.mapped.ILLUMINA.bwa.GWD.low_coverage.20130415.bam	HG02799	1	ALL	BAM	0.00406	0.00391	840560	8.92	0.50062	0.00035	0.50086	0.00034	8.943	0.9966	GWD.wgs.coriell_phase3_samples.20121126.snps.affy_6.genotypes.vcf.gz	PASS	2013-05-14 04:17:00	/nfs/1000g-archive/vol1/ftp/data/HG02799/alignment/HG02799.mapped.ILLUMINA.bwa.GWD.low_coverage.20130415.bam		HG02799.mapped.ILLUMINA.bwa.GWD.low_coverage.20130415.bam
21693	HG03700.mapped.ILLUMINA.bwa.PJL.low_coverage.20130415.bam	HG03700	0	ALL	BAM	0.00405	0.99684	781539	6.99	0.49904	2e-05	0.49923	6e-05	7.001	0.9987	PJL.wgs.coriell_phase3_samples.20121126.snps.affy_6.genotypes.vcf.gz	POSSIBLE_SWAP	2013-05-03 08:07:57	/nfs/1000g-archive/vol1/ftp/data/HG03700/alignment/HG03700.mapped.ILLUMINA.bwa.PJL.low_coverage.20130415.bam		HG03700.mapped.ILLUMINA.bwa.PJL.low_coverage.20130415.bam
12240	HG03039.mapped.ILLUMINA.bwa.GWD.low_coverage.20121211.bam	HG03039	1	ALL	BAM	0.00405	0.00446	840560	9.41	0.50064	0.00033	0.50077	0.00035	9.377	1.023	GWD.wgs.coriell_phase3_samples.20121126.snps.affy_6.genotypes.vcf.gz	PASS	2013-05-16 16:59:09	/nfs/1000g-archive/vol1/ftp/data/HG03039/alignment/HG03039.mapped.ILLUMINA.bwa.GWD.low_coverage.20121211.bam		HG03039.mapped.ILLUMINA.bwa.GWD.low_coverage.20121211.bam
57606	HG03100.mapped.ILLUMINA.bwa.ESN.low_coverage.20130415.bam	HG03100	1	ALL	BAM	0.00405	0.00438	835395	8.69	0.501	0.00015	0.50122	0.00018	8.669	1.0223	ESN.wgs.coriell_phase3_samples.20121126.snps.affy_6.genotypes.vcf.gz	PASS	2013-05-14 02:35:40	/nfs/1000g-archive/vol1/ftp/data/HG03100/alignment/HG03100.mapped.ILLUMINA.bwa.ESN.low_coverage.20130415.bam		HG03100.mapped.ILLUMINA.bwa.ESN.low_coverage.20130415.bam
12724	HG00410.mapped.ILLUMINA.bwa.CHS.low_coverage.20121211.bam	HG00410	1	ALL	BAM	0.00405	0.00379	662328	10.12	0.50172	0.00046	0.50112	0.00051	10.147	0.998	CHS.wgs.coriell_phase3_samples.20121126.snps.affy_6.genotypes.vcf.gz	PASS	2013-05-16 13:10:08	/nfs/1000g-archive/vol1/ftp/data/HG00410/alignment/HG00410.mapped.ILLUMINA.bwa.CHS.low_coverage.20121211.bam		HG00410.mapped.ILLUMINA.bwa.CHS.low_coverage.20121211.bam
12130	HG00632.mapped.ILLUMINA.bwa.CHS.low_coverage.20121211.bam	HG00632	1	ALL	BAM	0.00405	0	1243376	7.23	0.50208	0.00074	0	0	0	0	CHS.omni_wg_2141_filtered.vcf.gz	PASS	2013-05-17 09:44:27	/nfs/1000g-archive/vol1/ftp/data/HG00632/alignment/HG00632.mapped.ILLUMINA.bwa.CHS.low_coverage.20121211.bam		HG00632.mapped.ILLUMINA.bwa.CHS.low_coverage.20121211.bam
27137	HG04225.mapped.ILLUMINA.bwa.ITU.low_coverage.20130415.bam	HG04225	1	ALL	BAM	0.00404	0	1753219	6.77	0.50102	0.00012	0	0	0	0	ALL.omni_wg_2141_filtered.vcf.gz	PASS	2013-05-05 09:03:34	/nfs/1000g-archive/vol1/ftp/data/HG04225/alignment/HG04225.mapped.ILLUMINA.bwa.ITU.low_coverage.20130415.bam		HG04225.mapped.ILLUMINA.bwa.ITU.low_coverage.20130415.bam
12413	NA18990.mapped.ILLUMINA.bwa.JPT.low_coverage.20120522.bam	NA18990	1	ALL	BAM	0.00404	0	887456	5.47	0.49927	0.00017	0	0	0	0	ALL.wgs.coriell_phase3_samples.20121126.snps.affy_6.genotypes.vcf.gz	PASS	2013-05-16 17:03:08	/nfs/1000g-archive/vol1/ftp/data/NA18990/alignment/NA18990.mapped.ILLUMINA.bwa.JPT.low_coverage.20120522.bam		NA18990.mapped.ILLUMINA.bwa.JPT.low_coverage.20120522.bam
16878	HG00252.mapped.ILLUMINA.bwa.GBR.low_coverage.20130415.bam	HG00252	1	ALL	BAM	0.00403	0.00417	1389642	9.79	0.50196	0.0002	0.50266	0.00022	9.817	0.997	GBR.omni_wg_2141_filtered.vcf.gz	PASS	2013-04-30 19:38:18	/nfs/1000g-archive/vol1/ftp/data/HG00252/alignment/HG00252.mapped.ILLUMINA.bwa.GBR.low_coverage.20130415.bam		HG00252.mapped.ILLUMINA.bwa.GBR.low_coverage.20130415.bam
12676	HG02666.mapped.ILLUMINA.bwa.GWD.low_coverage.20121211.bam	HG02666	1	ALL	BAM	0.00403	0	1753219	9.2	0.49969	0.00036	0	0	0	0	ALL.omni_wg_2141_filtered.vcf.gz	PASS	2013-05-17 14:30:32	/nfs/1000g-archive/vol1/ftp/data/HG02666/alignment/HG02666.mapped.ILLUMINA.bwa.GWD.low_coverage.20121211.bam		HG02666.mapped.ILLUMINA.bwa.GWD.low_coverage.20121211.bam
64122	HG02667.mapped.ILLUMINA.bwa.GWD.low_coverage.20130415.bam	HG02667	1	ALL	BAM	0.00403	0	1753219	8.1	0.49854	0.00036	0	0	0	0	ALL.omni_wg_2141_filtered.vcf.gz	PASS	2013-05-14 08:14:42	/nfs/1000g-archive/vol1/ftp/data/HG02667/alignment/HG02667.mapped.ILLUMINA.bwa.GWD.low_coverage.20130415.bam		HG02667.mapped.ILLUMINA.bwa.GWD.low_coverage.20130415.bam
12590	HG02697.mapped.ILLUMINA.bwa.PJL.low_coverage.20121211.bam	HG02697	1	ALL	BAM	0.00403	0	1753219	8.92	0.50109	0.00032	0	0	0	0	ALL.omni_wg_2141_filtered.vcf.gz	PASS	2013-05-17 16:17:03	/nfs/1000g-archive/vol1/ftp/data/HG02697/alignment/HG02697.mapped.ILLUMINA.bwa.PJL.low_coverage.20121211.bam		HG02697.mapped.ILLUMINA.bwa.PJL.low_coverage.20121211.bam
8701	NA12005.mapped.ILLUMINA.bwa.CEU.low_coverage.20120522.bam	NA12005	1	ALL	BAM	0.00402	0.00417	1400785	13.27	0.50129	0.00025	0.50232	0.00028	13.29	0.9999	CEU.omni_wg_2141_filtered.vcf.gz	PASS	2013-05-17 11:08:59	/nfs/1000g-archive/vol1/ftp/data/NA12005/alignment/NA12005.mapped.ILLUMINA.bwa.CEU.low_coverage.20120522.bam		NA12005.mapped.ILLUMINA.bwa.CEU.low_coverage.20120522.bam
27497	HG03799.mapped.ILLUMINA.bwa.BEB.low_coverage.20130415.bam	HG03799	0	ALL	BAM	0.00401	0	1753219	13.09	0.50318	0.00046	0	0	0	0	ALL.omni_wg_2141_filtered.vcf.gz	PASS	2013-05-05 10:21:17	/nfs/1000g-archive/vol1/ftp/data/HG03799/alignment/HG03799.mapped.ILLUMINA.bwa.BEB.low_coverage.20130415.bam		HG03799.mapped.ILLUMINA.bwa.BEB.low_coverage.20130415.bam
55738	NA12045.mapped.ILLUMINA.bwa.CEU.low_coverage.20130415.bam	NA12045	1	ALL	BAM	0.00401	0	887456	10.76	0.50178	0.0002	0	0	0	0	ALL.wgs.coriell_phase3_samples.20121126.snps.affy_6.genotypes.vcf.gz	PASS	2013-05-13 23:52:21	/nfs/1000g-archive/vol1/ftp/data/NA12045/alignment/NA12045.mapped.ILLUMINA.bwa.CEU.low_coverage.20130415.bam		NA12045.mapped.ILLUMINA.bwa.CEU.low_coverage.20130415.bam
59726	HG03132.mapped.ILLUMINA.bwa.ESN.low_coverage.20130415.bam	HG03132	1	ALL	BAM	0.004	0.004	835395	7.9	0.50086	0.00042	0.50083	0.00038	7.916	0.9989	ESN.wgs.coriell_phase3_samples.20121126.snps.affy_6.genotypes.vcf.gz	PASS	2013-05-14 03:51:50	/nfs/1000g-archive/vol1/ftp/data/HG03132/alignment/HG03132.mapped.ILLUMINA.bwa.ESN.low_coverage.20130415.bam		HG03132.mapped.ILLUMINA.bwa.ESN.low_coverage.20130415.bam
10666	HG01188.mapped.ILLUMINA.bwa.PUR.low_coverage.20120522.bam	HG01188	1	ALL	BAM	0.00399	0.00404	1558284	6.87	0.50269	0.00031	0.50379	0.00033	6.907	0.9885	PUR.omni_wg_2141_filtered.vcf.gz	PASS	2013-05-16 20:09:21	/nfs/1000g-archive/vol1/ftp/data/HG01188/alignment/HG01188.mapped.ILLUMINA.bwa.PUR.low_coverage.20120522.bam		HG01188.mapped.ILLUMINA.bwa.PUR.low_coverage.20120522.bam
8816	HG02429.mapped.ILLUMINA.bwa.ACB.low_coverage.20120522.bam	HG02429	1	ALL	BAM	0.00399	0.00394	1597764	11.25	0.50162	0.00053	0.50175	0.0006	11.252	1.0022	ACB.omni_wg_2141_filtered.vcf.gz	PASS	2013-05-16 22:25:29	/nfs/1000g-archive/vol1/ftp/data/HG02429/alignment/HG02429.mapped.ILLUMINA.bwa.ACB.low_coverage.20120522.bam		HG02429.mapped.ILLUMINA.bwa.ACB.low_coverage.20120522.bam
12540	HG00599.mapped.ILLUMINA.bwa.CHS.low_coverage.20121211.bam	HG00599	1	ALL	BAM	0.00399	0.00359	662328	9.32	0.50026	0.00043	0.50047	0.00047	9.346	0.9981	CHS.wgs.coriell_phase3_samples.20121126.snps.affy_6.genotypes.vcf.gz	PASS	2013-05-16 14:23:59	/nfs/1000g-archive/vol1/ftp/data/HG00599/alignment/HG00599.mapped.ILLUMINA.bwa.CHS.low_coverage.20121211.bam		HG00599.mapped.ILLUMINA.bwa.CHS.low_coverage.20121211.bam
12514	HG02679.mapped.ILLUMINA.bwa.GWD.low_coverage.20121211.bam	HG02679	1	ALL	BAM	0.00399	0	1753219	8.04	0.49832	0.00022	0	0	0	0	ALL.omni_wg_2141_filtered.vcf.gz	PASS	2013-05-17 13:53:01	/nfs/1000g-archive/vol1/ftp/data/HG02679/alignment/HG02679.mapped.ILLUMINA.bwa.GWD.low_coverage.20121211.bam		HG02679.mapped.ILLUMINA.bwa.GWD.low_coverage.20121211.bam
12999	HG02724.mapped.ILLUMINA.bwa.PJL.low_coverage.20121211.bam	HG02724	1	ALL	BAM	0.00399	0	1753219	8.74	0.50135	0.00023	0	0	0	0	ALL.omni_wg_2141_filtered.vcf.gz	PASS	2013-05-17 07:38:18	/nfs/1000g-archive/vol1/ftp/data/HG02724/alignment/HG02724.mapped.ILLUMINA.bwa.PJL.low_coverage.20121211.bam		HG02724.mapped.ILLUMINA.bwa.PJL.low_coverage.20121211.bam
58348	HG03096.mapped.ILLUMINA.bwa.MSL.low_coverage.20130415.bam	HG03096	1	ALL	BAM	0.00398	0.00429	838168	10.13	0.50131	0.00011	0.50222	0.00015	10.102	1.0232	MSL.wgs.coriell_phase3_samples.20121126.snps.affy_6.genotypes.vcf.gz	PASS	2013-05-14 02:54:15	/nfs/1000g-archive/vol1/ftp/data/HG03096/alignment/HG03096.mapped.ILLUMINA.bwa.MSL.low_coverage.20130415.bam		HG03096.mapped.ILLUMINA.bwa.MSL.low_coverage.20130415.bam
55913	HG00345.mapped.ILLUMINA.bwa.FIN.low_coverage.20130415.bam	HG00345	1	ALL	BAM	0.00398	0.00422	1385013	10.76	0.50146	0.00023	0.50198	0.00023	10.784	0.9987	FIN.omni_wg_2141_filtered.vcf.gz	PASS	2013-05-14 00:16:58	/nfs/1000g-archive/vol1/ftp/data/HG00345/alignment/HG00345.mapped.ILLUMINA.bwa.FIN.low_coverage.20130415.bam		HG00345.mapped.ILLUMINA.bwa.FIN.low_coverage.20130415.bam
21909	HG02774.mapped.ILLUMINA.bwa.PJL.low_coverage.20130415.bam	HG02774	1	ALL	BAM	0.00398	0	1753219	7.72	0.50067	1e-05	0	0	0	0	ALL.omni_wg_2141_filtered.vcf.gz	PASS	2013-05-03 08:40:25	/nfs/1000g-archive/vol1/ftp/data/HG02774/alignment/HG02774.mapped.ILLUMINA.bwa.PJL.low_coverage.20130415.bam		HG02774.mapped.ILLUMINA.bwa.PJL.low_coverage.20130415.bam
61025	HG03097.mapped.ILLUMINA.bwa.MSL.low_coverage.20130415.bam	HG03097	1	ALL	BAM	0.00397	0	1753219	11.19	0.50012	0.00034	0	0	0	0	ALL.omni_wg_2141_filtered.vcf.gz	PASS	2013-05-14 04:38:47	/nfs/1000g-archive/vol1/ftp/data/HG03097/alignment/HG03097.mapped.ILLUMINA.bwa.MSL.low_coverage.20130415.bam		HG03097.mapped.ILLUMINA.bwa.MSL.low_coverage.20130415.bam
12372	HG02721.mapped.ILLUMINA.bwa.GWD.low_coverage.20121211.bam	HG02721	1	ALL	BAM	0.00396	0.00438	840560	10.28	0.50109	0.00034	0.50141	0.00037	10.244	1.0237	GWD.wgs.coriell_phase3_samples.20121126.snps.affy_6.genotypes.vcf.gz	PASS	2013-05-16 18:17:57	/nfs/1000g-archive/vol1/ftp/data/HG02721/alignment/HG02721.mapped.ILLUMINA.bwa.GWD.low_coverage.20121211.bam		HG02721.mapped.ILLUMINA.bwa.GWD.low_coverage.20121211.bam
54981	HG00473.mapped.ILLUMINA.bwa.CHS.low_coverage.20130415.bam	HG00473	1	ALL	BAM	0.00396	0	662328	10.96	0.50245	0.00017	0	0	0	0	CHS.wgs.coriell_phase3_samples.20121126.snps.affy_6.genotypes.vcf.gz	PASS	2013-05-13 22:16:42	/nfs/1000g-archive/vol1/ftp/data/HG00473/alignment/HG00473.mapped.ILLUMINA.bwa.CHS.low_coverage.20130415.bam		HG00473.mapped.ILLUMINA.bwa.CHS.low_coverage.20130415.bam
60550	HG03464.mapped.ILLUMINA.bwa.MSL.low_coverage.20130415.bam	HG03464	1	ALL	BAM	0.00396	0	1753219	9.05	0.50072	0.00038	0	0	0	0	ALL.omni_wg_2141_filtered.vcf.gz	PASS	2013-05-14 04:27:49	/nfs/1000g-archive/vol1/ftp/data/HG03464/alignment/HG03464.mapped.ILLUMINA.bwa.MSL.low_coverage.20130415.bam		HG03464.mapped.ILLUMINA.bwa.MSL.low_coverage.20130415.bam
45635	NA20539.mapped.ILLUMINA.bwa.TSI.low_coverage.20130415.bam	NA20539	1	ALL	BAM	0.00395	0.00471	1402149	5.09	0.50218	0.00051	0.50271	0.00049	5.099	0.9997	TSI.omni_wg_2141_filtered.vcf.gz	PASS	2013-05-10 13:17:30	/nfs/1000g-archive/vol1/ftp/data/NA20539/alignment/NA20539.mapped.ILLUMINA.bwa.TSI.low_coverage.20130415.bam		NA20539.mapped.ILLUMINA.bwa.TSI.low_coverage.20130415.bam
12125	HG02621.mapped.ILLUMINA.bwa.GWD.low_coverage.20121211.bam	HG02621	1	ALL	BAM	0.00395	0.00381	840560	9.25	0.49991	0.00033	0.50019	0.00034	9.265	0.9974	GWD.wgs.coriell_phase3_samples.20121126.snps.affy_6.genotypes.vcf.gz	PASS	2013-05-16 23:19:37	/nfs/1000g-archive/vol1/ftp/data/HG02621/alignment/HG02621.mapped.ILLUMINA.bwa.GWD.low_coverage.20121211.bam		HG02621.mapped.ILLUMINA.bwa.GWD.low_coverage.20121211.bam
12059	HG00729.mapped.ILLUMINA.bwa.CHS.low_coverage.20121211.bam	HG00729	1	ALL	BAM	0.00395	0	1243376	9.58	0.50207	0.00073	0	0	0	0	CHS.omni_wg_2141_filtered.vcf.gz	PASS	2013-05-17 03:12:10	/nfs/1000g-archive/vol1/ftp/data/HG00729/alignment/HG00729.mapped.ILLUMINA.bwa.CHS.low_coverage.20121211.bam		HG00729.mapped.ILLUMINA.bwa.CHS.low_coverage.20121211.bam
27372	NA12777.mapped.ILLUMINA.bwa.CEU.low_coverage.20130415.bam	NA12777	1	ALL	BAM	0.00395	0	887456	8.77	0.5027	0.00025	0	0	0	0	ALL.wgs.coriell_phase3_samples.20121126.snps.affy_6.genotypes.vcf.gz	PASS	2013-05-05 09:36:30	/nfs/1000g-archive/vol1/ftp/data/NA12777/alignment/NA12777.mapped.ILLUMINA.bwa.CEU.low_coverage.20130415.bam		NA12777.mapped.ILLUMINA.bwa.CEU.low_coverage.20130415.bam
12303	HG03578.mapped.ILLUMINA.bwa.MSL.low_coverage.20121211.bam	HG03578	1	ALL	BAM	0.00394	0.00488	838168	3.43	0.50151	0.00017	0.50051	5e-05	3.439	0.9979	MSL.wgs.coriell_phase3_samples.20121126.snps.affy_6.genotypes.vcf.gz	PASS	2013-05-16 08:21:00	/nfs/1000g-archive/vol1/ftp/data/HG03578/alignment/HG03578.mapped.ILLUMINA.bwa.MSL.low_coverage.20121211.bam		HG03578.mapped.ILLUMINA.bwa.MSL.low_coverage.20121211.bam
12206	HG02734.mapped.ILLUMINA.bwa.PJL.low_coverage.20121211.bam	HG02734	1	ALL	BAM	0.00394	0	1753219	9.32	0.50222	0.0003	0	0	0	0	ALL.omni_wg_2141_filtered.vcf.gz	PASS	2013-05-17 07:19:24	/nfs/1000g-archive/vol1/ftp/data/HG02734/alignment/HG02734.mapped.ILLUMINA.bwa.PJL.low_coverage.20121211.bam		HG02734.mapped.ILLUMINA.bwa.PJL.low_coverage.20121211.bam
9089	NA19443.mapped.ILLUMINA.bwa.LWK.low_coverage.20120522.bam	NA19443	1	ALL	BAM	0.00393	0.00409	1570264	10.22	0.50219	0.00029	0.50283	0.00016	10.21	1.0011	LWK.omni_wg_2141_filtered.vcf.gz	PASS	2013-05-17 08:01:14	/nfs/1000g-archive/vol1/ftp/data/NA19443/alignment/NA19443.mapped.ILLUMINA.bwa.LWK.low_coverage.20120522.bam		NA19443.mapped.ILLUMINA.bwa.LWK.low_coverage.20120522.bam
8931	NA19684.mapped.ILLUMINA.bwa.MXL.low_coverage.20120522.bam	NA19684	1	ALL	BAM	0.00393	0.00302	1437703	4.92	0.5035	0.00096	0.50307	0.00042	4.932	0.9956	MXL.omni_wg_2141_filtered.vcf.gz	PASS	2013-05-16 20:41:35	/nfs/1000g-archive/vol1/ftp/data/NA19684/alignment/NA19684.mapped.ILLUMINA.bwa.MXL.low_coverage.20120522.bam		NA19684.mapped.ILLUMINA.bwa.MXL.low_coverage.20120522.bam
63510	HG02620.mapped.ILLUMINA.bwa.GWD.low_coverage.20130415.bam	HG02620	1	ALL	BAM	0.00393	0	1753219	8.91	0.49922	0.00035	0	0	0	0	ALL.omni_wg_2141_filtered.vcf.gz	PASS	2013-05-14 07:18:08	/nfs/1000g-archive/vol1/ftp/data/HG02620/alignment/HG02620.mapped.ILLUMINA.bwa.GWD.low_coverage.20130415.bam		HG02620.mapped.ILLUMINA.bwa.GWD.low_coverage.20130415.bam
28825	HG03943.mapped.ILLUMINA.bwa.STU.low_coverage.20130415.bam	HG03943	1	ALL	BAM	0.00393	0	1753219	10.23	0.50099	0.00018	0	0	0	0	ALL.omni_wg_2141_filtered.vcf.gz	PASS	2013-05-05 12:14:03	/nfs/1000g-archive/vol1/ftp/data/HG03943/alignment/HG03943.mapped.ILLUMINA.bwa.STU.low_coverage.20130415.bam		HG03943.mapped.ILLUMINA.bwa.STU.low_coverage.20130415.bam
12189	HG02645.mapped.ILLUMINA.bwa.GWD.low_coverage.20121211.bam	HG02645	1	ALL	BAM	0.00392	0.00428	840560	9.35	0.50186	0.00032	0.50201	0.0003	9.323	1.0232	GWD.wgs.coriell_phase3_samples.20121126.snps.affy_6.genotypes.vcf.gz	PASS	2013-05-16 15:19:45	/nfs/1000g-archive/vol1/ftp/data/HG02645/alignment/HG02645.mapped.ILLUMINA.bwa.GWD.low_coverage.20121211.bam		HG02645.mapped.ILLUMINA.bwa.GWD.low_coverage.20121211.bam
57391	HG02594.mapped.ILLUMINA.bwa.GWD.low_coverage.20130415.bam	HG02594	1	ALL	BAM	0.00392	0.00416	840560	11.79	0.50196	0.00026	0.50294	0.00019	11.751	1.0221	GWD.wgs.coriell_phase3_samples.20121126.snps.affy_6.genotypes.vcf.gz	PASS	2013-05-14 02:25:10	/nfs/1000g-archive/vol1/ftp/data/HG02594/alignment/HG02594.mapped.ILLUMINA.bwa.GWD.low_coverage.20130415.bam		HG02594.mapped.ILLUMINA.bwa.GWD.low_coverage.20130415.bam
13145	HG02787.mapped.ILLUMINA.bwa.PJL.low_coverage.20121211.bam	HG02787	1	ALL	BAM	0.00392	0.00415	781539	9	0.49993	0.00021	0.50075	0.00023	9.021	0.9977	PJL.wgs.coriell_phase3_samples.20121126.snps.affy_6.genotypes.vcf.gz	PASS	2013-05-16 20:32:37	/nfs/1000g-archive/vol1/ftp/data/HG02787/alignment/HG02787.mapped.ILLUMINA.bwa.PJL.low_coverage.20121211.bam		HG02787.mapped.ILLUMINA.bwa.PJL.low_coverage.20121211.bam
12650	HG03049.mapped.ILLUMINA.bwa.GWD.low_coverage.20121211.bam	HG03049	1	ALL	BAM	0.00392	0.00403	840560	8.87	0.50054	0.00031	0.50054	0.00035	8.888	0.9969	GWD.wgs.coriell_phase3_samples.20121126.snps.affy_6.genotypes.vcf.gz	PASS	2013-05-16 20:04:29	/nfs/1000g-archive/vol1/ftp/data/HG03049/alignment/HG03049.mapped.ILLUMINA.bwa.GWD.low_coverage.20121211.bam		HG03049.mapped.ILLUMINA.bwa.GWD.low_coverage.20121211.bam
59286	HG02646.mapped.ILLUMINA.bwa.GWD.low_coverage.20130415.bam	HG02646	1	ALL	BAM	0.00392	0.00368	840560	8.09	0.50071	0.0001	0.50161	0.00036	8.105	0.9988	GWD.wgs.coriell_phase3_samples.20121126.snps.affy_6.genotypes.vcf.gz	PASS	2013-05-14 03:27:53	/nfs/1000g-archive/vol1/ftp/data/HG02646/alignment/HG02646.mapped.ILLUMINA.bwa.GWD.low_coverage.20130415.bam		HG02646.mapped.ILLUMINA.bwa.GWD.low_coverage.20130415.bam
11763	HG02655.mapped.ILLUMINA.bwa.PJL.low_coverage.20121211.bam	HG02655	1	ALL	BAM	0.00392	0	1753219	8.38	0.50131	0.00018	0	0	0	0	ALL.omni_wg_2141_filtered.vcf.gz	PASS	2013-05-17 06:26:09	/nfs/1000g-archive/vol1/ftp/data/HG02655/alignment/HG02655.mapped.ILLUMINA.bwa.PJL.low_coverage.20121211.bam		HG02655.mapped.ILLUMINA.bwa.PJL.low_coverage.20121211.bam
10413	NA19707.mapped.ILLUMINA.bwa.ASW.low_coverage.20120522.bam	NA19707	1	ALL	BAM	0.00392	0	718973	9.16	0.50633	0.00178	0	0	0	0	ASW.wgs.coriell_phase3_samples.20121126.snps.affy_6.genotypes.vcf.gz	PASS	2013-05-16 11:22:53	/nfs/1000g-archive/vol1/ftp/data/NA19707/alignment/NA19707.mapped.ILLUMINA.bwa.ASW.low_coverage.20120522.bam		NA19707.mapped.ILLUMINA.bwa.ASW.low_coverage.20120522.bam
27519	HG03858.mapped.ILLUMINA.bwa.STU.low_coverage.20130415.bam	HG03858	1	ALL	BAM	0.00391	0.00448	779732	8.88	0.50001	0.00015	0.5012	0.00018	8.904	0.996	STU.wgs.coriell_phase3_samples.20121126.snps.affy_6.genotypes.vcf.gz	PASS	2013-05-05 10:22:59	/nfs/1000g-archive/vol1/ftp/data/HG03858/alignment/HG03858.mapped.ILLUMINA.bwa.STU.low_coverage.20130415.bam		HG03858.mapped.ILLUMINA.bwa.STU.low_coverage.20130415.bam
8949	HG02016.mapped.ILLUMINA.bwa.KHV.low_coverage.20120522.bam	HG02016	1	ALL	BAM	0.00391	0.00369	1241587	4.05	0.50452	0.00075	0.50301	0.00058	4.06	0.9984	KHV.omni_wg_2141_filtered.vcf.gz	PASS	2013-05-17 10:03:32	/nfs/1000g-archive/vol1/ftp/data/HG02016/alignment/HG02016.mapped.ILLUMINA.bwa.KHV.low_coverage.20120522.bam		HG02016.mapped.ILLUMINA.bwa.KHV.low_coverage.20120522.bam
12977	HG02722.mapped.ILLUMINA.bwa.GWD.low_coverage.20121211.bam	HG02722	1	ALL	BAM	0.00389	0.00403	840560	9.85	0.50101	0.00037	0.50119	0.00032	9.865	0.9972	GWD.wgs.coriell_phase3_samples.20121126.snps.affy_6.genotypes.vcf.gz	PASS	2013-05-16 16:34:58	/nfs/1000g-archive/vol1/ftp/data/HG02722/alignment/HG02722.mapped.ILLUMINA.bwa.GWD.low_coverage.20121211.bam		HG02722.mapped.ILLUMINA.bwa.GWD.low_coverage.20121211.bam
12187	NA19023.mapped.ILLUMINA.bwa.LWK.low_coverage.20121211.bam	NA19023	1	ALL	BAM	0.00389	0	887456	10.98	0.50035	0.00015	0	0	0	0	ALL.wgs.coriell_phase3_samples.20121126.snps.affy_6.genotypes.vcf.gz	PASS	2013-05-16 23:12:19	/nfs/1000g-archive/vol1/ftp/data/NA19023/alignment/NA19023.mapped.ILLUMINA.bwa.LWK.low_coverage.20121211.bam		NA19023.mapped.ILLUMINA.bwa.LWK.low_coverage.20121211.bam
10419	NA19054.mapped.ILLUMINA.bwa.JPT.low_coverage.20120522.bam	NA19054	1	ALL	BAM	0.00388	0.00446	1243522	6.01	0.50665	0.0009	0.50731	0.0009	6.061	0.9888	JPT.omni_wg_2141_filtered.vcf.gz	PASS	2013-05-17 11:51:33	/nfs/1000g-archive/vol1/ftp/data/NA19054/alignment/NA19054.mapped.ILLUMINA.bwa.JPT.low_coverage.20120522.bam		NA19054.mapped.ILLUMINA.bwa.JPT.low_coverage.20120522.bam
55365	NA07037.mapped.ILLUMINA.bwa.CEU.low_coverage.20130502.bam	NA07037	1	ALL	BAM	0.00388	0	887456	8.2	0.50215	0.00032	0	0	0	0	ALL.wgs.coriell_phase3_samples.20121126.snps.affy_6.genotypes.vcf.gz	PASS	2013-05-13 23:06:07	/nfs/1000g-archive/vol1/ftp/data/NA07037/alignment/NA07037.mapped.ILLUMINA.bwa.CEU.low_coverage.20130502.bam		NA07037.mapped.ILLUMINA.bwa.CEU.low_coverage.20130502.bam
21163	HG03095.mapped.ILLUMINA.bwa.MSL.low_coverage.20130415.bam	HG03095	1	ALL	BAM	0.00387	0.00398	838168	8.46	0.5001	7e-05	0.50039	8e-05	8.466	0.9996	MSL.wgs.coriell_phase3_samples.20121126.snps.affy_6.genotypes.vcf.gz	PASS	2013-05-03 06:29:39	/nfs/1000g-archive/vol1/ftp/data/HG03095/alignment/HG03095.mapped.ILLUMINA.bwa.MSL.low_coverage.20130415.bam		HG03095.mapped.ILLUMINA.bwa.MSL.low_coverage.20130415.bam
55434	HG02433.mapped.ILLUMINA.bwa.ACB.low_coverage.20130415.bam	HG02433	1	ALL	BAM	0.00387	0.00368	1597764	3.98	0.50147	0.00073	0.50163	0.00076	3.98	1.0007	ACB.omni_wg_2141_filtered.vcf.gz	PASS	2013-05-13 23:26:59	/nfs/1000g-archive/vol1/ftp/data/HG02433/alignment/HG02433.mapped.ILLUMINA.bwa.ACB.low_coverage.20130415.bam		HG02433.mapped.ILLUMINA.bwa.ACB.low_coverage.20130415.bam
26444	HG04229.mapped.ILLUMINA.bwa.STU.low_coverage.20130415.bam	HG04229	1	ALL	BAM	0.00387	0	1753219	8.36	0.50147	0.00016	0	0	0	0	ALL.omni_wg_2141_filtered.vcf.gz	PASS	2013-05-05 08:10:25	/nfs/1000g-archive/vol1/ftp/data/HG04229/alignment/HG04229.mapped.ILLUMINA.bwa.STU.low_coverage.20130415.bam		HG04229.mapped.ILLUMINA.bwa.STU.low_coverage.20130415.bam
25527	HG04134.mapped.ILLUMINA.bwa.BEB.low_coverage.20130415.bam	HG04134	1	ALL	BAM	0.00386	0.00444	783628	4.42	0.50044	0.00032	0.5009	0.00026	4.408	1.0228	BEB.wgs.coriell_phase3_samples.20121126.snps.affy_6.genotypes.vcf.gz	PASS	2013-05-05 06:01:38	/nfs/1000g-archive/vol1/ftp/data/HG04134/alignment/HG04134.mapped.ILLUMINA.bwa.BEB.low_coverage.20130415.bam		HG04134.mapped.ILLUMINA.bwa.BEB.low_coverage.20130415.bam
56401	HG01205.mapped.ILLUMINA.bwa.PUR.low_coverage.20130415.bam	HG01205	1	ALL	BAM	0.00386	0.00386	1558284	11.31	0.50223	0.00034	0.5034	0.00048	11.336	0.9963	PUR.omni_wg_2141_filtered.vcf.gz	PASS	2013-05-14 01:15:26	/nfs/1000g-archive/vol1/ftp/data/HG01205/alignment/HG01205.mapped.ILLUMINA.bwa.PUR.low_coverage.20130415.bam		HG01205.mapped.ILLUMINA.bwa.PUR.low_coverage.20130415.bam
61228	HG03058.mapped.ILLUMINA.bwa.MSL.low_coverage.20130415.bam	HG03058	1	ALL	BAM	0.00386	0.00375	838168	8.51	0.49985	0.00033	0.50053	0.00034	8.524	0.9994	MSL.wgs.coriell_phase3_samples.20121126.snps.affy_6.genotypes.vcf.gz	PASS	2013-05-14 04:44:52	/nfs/1000g-archive/vol1/ftp/data/HG03058/alignment/HG03058.mapped.ILLUMINA.bwa.MSL.low_coverage.20130415.bam		HG03058.mapped.ILLUMINA.bwa.MSL.low_coverage.20130415.bam
12442	HG02614.mapped.ILLUMINA.bwa.GWD.low_coverage.20121211.bam	HG02614	1	ALL	BAM	0.00385	0.00386	840560	7.71	0.50135	0.00037	0.50138	0.00033	7.718	0.9999	GWD.wgs.coriell_phase3_samples.20121126.snps.affy_6.genotypes.vcf.gz	PASS	2013-05-16 18:36:02	/nfs/1000g-archive/vol1/ftp/data/HG02614/alignment/HG02614.mapped.ILLUMINA.bwa.GWD.low_coverage.20121211.bam		HG02614.mapped.ILLUMINA.bwa.GWD.low_coverage.20121211.bam
12656	HG04156.mapped.ILLUMINA.bwa.BEB.low_coverage.20121211.bam	HG04156	1	ALL	BAM	0.00384	0.00357	783628	5.3	0.50172	4e-05	0.502	6e-05	5.313	0.9973	BEB.wgs.coriell_phase3_samples.20121126.snps.affy_6.genotypes.vcf.gz	PASS	2013-05-16 19:14:40	/nfs/1000g-archive/vol1/ftp/data/HG04156/alignment/HG04156.mapped.ILLUMINA.bwa.BEB.low_coverage.20121211.bam		HG04156.mapped.ILLUMINA.bwa.BEB.low_coverage.20121211.bam
12675	HG00675.mapped.ILLUMINA.bwa.CHS.low_coverage.20121211.bam	HG00675	1	ALL	BAM	0.00384	0.00329	662328	9.13	0.50117	0.00049	0.5013	0.00048	9.155	0.9977	CHS.wgs.coriell_phase3_samples.20121126.snps.affy_6.genotypes.vcf.gz	PASS	2013-05-16 20:28:43	/nfs/1000g-archive/vol1/ftp/data/HG00675/alignment/HG00675.mapped.ILLUMINA.bwa.CHS.low_coverage.20121211.bam		HG00675.mapped.ILLUMINA.bwa.CHS.low_coverage.20121211.bam
41812	HG03888.mapped.ILLUMINA.bwa.STU.low_coverage.20130415.bam	HG03888	1	ALL	BAM	0.00384	0	1753219	9.23	0.50298	0.00037	0	0	0	0	ALL.omni_wg_2141_filtered.vcf.gz	PASS	2013-05-10 10:31:00	/nfs/1000g-archive/vol1/ftp/data/HG03888/alignment/HG03888.mapped.ILLUMINA.bwa.STU.low_coverage.20130415.bam		HG03888.mapped.ILLUMINA.bwa.STU.low_coverage.20130415.bam
34880	NA20524.mapped.ILLUMINA.bwa.TSI.low_coverage.20130415.bam	NA20524	1	ALL	BAM	0.00382	0.00392	1402149	8.18	0.50201	0.00032	0.50172	0.00036	8.181	1.0004	TSI.omni_wg_2141_filtered.vcf.gz	PASS	2013-05-08 06:45:50	/nfs/1000g-archive/vol1/ftp/data/NA20524/alignment/NA20524.mapped.ILLUMINA.bwa.TSI.low_coverage.20130415.bam		NA20524.mapped.ILLUMINA.bwa.TSI.low_coverage.20130415.bam
9628	HG01798.mapped.ILLUMINA.bwa.CDX.low_coverage.20120522.bam	HG01798	1	ALL	BAM	0.00382	0.00364	1235978	6.45	0.50179	0.00018	0.50123	0.00022	6.456	1.002	CDX.omni_wg_2141_filtered.vcf.gz	PASS	2013-05-16 23:56:00	/nfs/1000g-archive/vol1/ftp/data/HG01798/alignment/HG01798.mapped.ILLUMINA.bwa.CDX.low_coverage.20120522.bam		HG01798.mapped.ILLUMINA.bwa.CDX.low_coverage.20120522.bam
46362	HG03722.mapped.ILLUMINA.bwa.ITU.low_coverage.20130415.bam	HG03722	1	ALL	BAM	0.00382	0	1753219	11.45	0.50163	0.00031	0	0	0	0	ALL.omni_wg_2141_filtered.vcf.gz	PASS	2013-05-10 13:44:09	/nfs/1000g-archive/vol1/ftp/data/HG03722/alignment/HG03722.mapped.ILLUMINA.bwa.ITU.low_coverage.20130415.bam		HG03722.mapped.ILLUMINA.bwa.ITU.low_coverage.20130415.bam
16548	HG01105.mapped.ILLUMINA.bwa.PUR.low_coverage.20130415.bam	HG01105	1	ALL	BAM	0.00381	0.00425	1558284	7.07	0.50089	0.00015	0.50163	0.00025	7.074	1.0032	PUR.omni_wg_2141_filtered.vcf.gz	PASS	2013-04-30 19:10:11	/nfs/1000g-archive/vol1/ftp/data/HG01105/alignment/HG01105.mapped.ILLUMINA.bwa.PUR.low_coverage.20130415.bam		HG01105.mapped.ILLUMINA.bwa.PUR.low_coverage.20130415.bam
59525	HG02675.mapped.ILLUMINA.bwa.GWD.low_coverage.20130415.bam	HG02675	1	ALL	BAM	0.00381	0.00418	840560	8.46	0.50122	0.00034	0.50112	0.00032	8.44	1.0227	GWD.wgs.coriell_phase3_samples.20121126.snps.affy_6.genotypes.vcf.gz	PASS	2013-05-14 03:44:55	/nfs/1000g-archive/vol1/ftp/data/HG02675/alignment/HG02675.mapped.ILLUMINA.bwa.GWD.low_coverage.20130415.bam		HG02675.mapped.ILLUMINA.bwa.GWD.low_coverage.20130415.bam
56556	NA18622.mapped.ILLUMINA.bwa.CHB.low_coverage.20130415.bam	NA18622	1	ALL	BAM	0.00381	0.00376	1252142	11.77	0.50171	0.00014	0.50245	0.00019	11.79	1	CHB.omni_wg_2141_filtered.vcf.gz	PASS	2013-05-14 01:30:42	/nfs/1000g-archive/vol1/ftp/data/NA18622/alignment/NA18622.mapped.ILLUMINA.bwa.CHB.low_coverage.20130415.bam		NA18622.mapped.ILLUMINA.bwa.CHB.low_coverage.20130415.bam
60352	HG02974.mapped.ILLUMINA.bwa.ESN.low_coverage.20130415.bam	HG02974	1	ALL	BAM	0.0038	0.00391	835395	9.18	0.50061	0.00036	0.50077	0.00035	9.202	0.9982	ESN.wgs.coriell_phase3_samples.20121126.snps.affy_6.genotypes.vcf.gz	PASS	2013-05-14 04:20:12	/nfs/1000g-archive/vol1/ftp/data/HG02974/alignment/HG02974.mapped.ILLUMINA.bwa.ESN.low_coverage.20130415.bam		HG02974.mapped.ILLUMINA.bwa.ESN.low_coverage.20130415.bam
40048	NA20778.mapped.ILLUMINA.bwa.TSI.low_coverage.20130415.bam	NA20778	1	ALL	BAM	0.0038	0	887456	8.15	0.50084	0.00039	0	0	0	0	ALL.wgs.coriell_phase3_samples.20121126.snps.affy_6.genotypes.vcf.gz	PASS	2013-05-10 08:12:20	/nfs/1000g-archive/vol1/ftp/data/NA20778/alignment/NA20778.mapped.ILLUMINA.bwa.TSI.low_coverage.20130415.bam		NA20778.mapped.ILLUMINA.bwa.TSI.low_coverage.20130415.bam
44110	HG03781.mapped.ILLUMINA.bwa.ITU.low_coverage.20130415.bam	HG03781	1	ALL	BAM	0.00379	0.0038	781365	9.71	0.50027	0.00014	0.50003	0.00014	9.728	0.9977	ITU.wgs.coriell_phase3_samples.20121126.snps.affy_6.genotypes.vcf.gz	PASS	2013-05-10 11:56:34	/nfs/1000g-archive/vol1/ftp/data/HG03781/alignment/HG03781.mapped.ILLUMINA.bwa.ITU.low_coverage.20130415.bam		HG03781.mapped.ILLUMINA.bwa.ITU.low_coverage.20130415.bam
25800	HG04070.mapped.ILLUMINA.bwa.ITU.low_coverage.20130415.bam	HG04070	1	ALL	BAM	0.00378	0.00615	781365	7.32	0.49909	6e-05	0.50057	6e-05	7.325	0.9995	ITU.wgs.coriell_phase3_samples.20121126.snps.affy_6.genotypes.vcf.gz	PASS	2013-05-05 06:31:16	/nfs/1000g-archive/vol1/ftp/data/HG04070/alignment/HG04070.mapped.ILLUMINA.bwa.ITU.low_coverage.20130415.bam		HG04070.mapped.ILLUMINA.bwa.ITU.low_coverage.20130415.bam
60080	HG02628.mapped.ILLUMINA.bwa.GWD.low_coverage.20130415.bam	HG02628	1	ALL	BAM	0.00378	0.0043	840560	7.57	0.50192	0.00044	0.50143	0.00048	7.541	1.0244	GWD.wgs.coriell_phase3_samples.20121126.snps.affy_6.genotypes.vcf.gz	PASS	2013-05-14 04:05:18	/nfs/1000g-archive/vol1/ftp/data/HG02628/alignment/HG02628.mapped.ILLUMINA.bwa.GWD.low_coverage.20130415.bam		HG02628.mapped.ILLUMINA.bwa.GWD.low_coverage.20130415.bam
12719	HG03452.mapped.ILLUMINA.bwa.MSL.low_coverage.20121211.bam	HG03452	1	ALL	BAM	0.00378	0.00369	838168	9.17	0.50178	0.00033	0.50099	0.00034	9.18	0.9986	MSL.wgs.coriell_phase3_samples.20121126.snps.affy_6.genotypes.vcf.gz	PASS	2013-05-16 17:18:01	/nfs/1000g-archive/vol1/ftp/data/HG03452/alignment/HG03452.mapped.ILLUMINA.bwa.MSL.low_coverage.20121211.bam		HG03452.mapped.ILLUMINA.bwa.MSL.low_coverage.20121211.bam
13063	HG02491.mapped.ILLUMINA.bwa.PJL.low_coverage.20121211.bam	HG02491	1	ALL	BAM	0.00377	0.00373	781539	9.29	0.50167	0.00032	0.50068	0.00034	9.308	0.9979	PJL.wgs.coriell_phase3_samples.20121126.snps.affy_6.genotypes.vcf.gz	PASS	2013-05-16 12:12:42	/nfs/1000g-archive/vol1/ftp/data/HG02491/alignment/HG02491.mapped.ILLUMINA.bwa.PJL.low_coverage.20121211.bam		HG02491.mapped.ILLUMINA.bwa.PJL.low_coverage.20121211.bam
10441	HG01167.mapped.ILLUMINA.bwa.PUR.low_coverage.20120522.bam	HG01167	1	ALL	BAM	0.00377	0	854341	14.82	0.50138	0.0001	0	0	0	0	PUR.wgs.coriell_phase3_samples.20121126.snps.affy_6.genotypes.vcf.gz	PASS	2013-05-16 08:02:27	/nfs/1000g-archive/vol1/ftp/data/HG01167/alignment/HG01167.mapped.ILLUMINA.bwa.PUR.low_coverage.20120522.bam		HG01167.mapped.ILLUMINA.bwa.PUR.low_coverage.20120522.bam
8228	HG01197.mapped.ILLUMINA.bwa.PUR.low_coverage.20120522.bam	HG01197	1	ALL	BAM	0.00376	0	854341	5.97	0.5006	0.00022	0	0	0	0	PUR.wgs.coriell_phase3_samples.20121126.snps.affy_6.genotypes.vcf.gz	PASS	2013-05-16 16:16:51	/nfs/1000g-archive/vol1/ftp/data/HG01197/alignment/HG01197.mapped.ILLUMINA.bwa.PUR.low_coverage.20120522.bam		HG01197.mapped.ILLUMINA.bwa.PUR.low_coverage.20120522.bam
11900	HG02660.mapped.ILLUMINA.bwa.PJL.low_coverage.20121211.bam	HG02660	1	ALL	BAM	0.00376	0	1753219	8.25	0.5012	0.00021	0	0	0	0	ALL.omni_wg_2141_filtered.vcf.gz	PASS	2013-05-17 15:05:19	/nfs/1000g-archive/vol1/ftp/data/HG02660/alignment/HG02660.mapped.ILLUMINA.bwa.PJL.low_coverage.20121211.bam		HG02660.mapped.ILLUMINA.bwa.PJL.low_coverage.20121211.bam
12579	HG02805.mapped.ILLUMINA.bwa.GWD.low_coverage.20121211.bam	HG02805	1	ALL	BAM	0.00375	0.00466	840560	8.16	0.50063	0.00019	0.50116	0.00016	8.172	0.9986	GWD.wgs.coriell_phase3_samples.20121126.snps.affy_6.genotypes.vcf.gz	PASS	2013-05-16 21:28:51	/nfs/1000g-archive/vol1/ftp/data/HG02805/alignment/HG02805.mapped.ILLUMINA.bwa.GWD.low_coverage.20121211.bam		HG02805.mapped.ILLUMINA.bwa.GWD.low_coverage.20121211.bam
12036	HG02491.mapped.ILLUMINA.bwa.PJL.low_coverage.20121211.bam	HG02491	1	ALL	BAM	0.00375	0	1753219	9.04	0.502	0.00024	0	0	0	0	ALL.omni_wg_2141_filtered.vcf.gz	PASS	2013-05-17 13:38:46	/nfs/1000g-archive/vol1/ftp/data/HG02491/alignment/HG02491.mapped.ILLUMINA.bwa.PJL.low_coverage.20121211.bam		HG02491.mapped.ILLUMINA.bwa.PJL.low_coverage.20121211.bam
27140	NA12546.mapped.ILLUMINA.bwa.CEU.low_coverage.20130415.bam	NA12546	1	ALL	BAM	0.00375	0	887456	8.19	0.50173	0.00032	0	0	0	0	ALL.wgs.coriell_phase3_samples.20121126.snps.affy_6.genotypes.vcf.gz	PASS	2013-05-05 09:04:09	/nfs/1000g-archive/vol1/ftp/data/NA12546/alignment/NA12546.mapped.ILLUMINA.bwa.CEU.low_coverage.20130415.bam		NA12546.mapped.ILLUMINA.bwa.CEU.low_coverage.20130415.bam
58192	HG02588.mapped.ILLUMINA.bwa.GWD.low_coverage.20130415.bam	HG02588	1	ALL	BAM	0.00374	0.00402	840560	9.46	0.50192	0.0003	0.50203	0.00022	9.432	1.0224	GWD.wgs.coriell_phase3_samples.20121126.snps.affy_6.genotypes.vcf.gz	PASS	2013-05-14 02:50:54	/nfs/1000g-archive/vol1/ftp/data/HG02588/alignment/HG02588.mapped.ILLUMINA.bwa.GWD.low_coverage.20130415.bam		HG02588.mapped.ILLUMINA.bwa.GWD.low_coverage.20130415.bam
12243	HG03941.mapped.ILLUMINA.bwa.BEB.low_coverage.20121211.bam	HG03941	1	ALL	BAM	0.00374	0.00391	783628	8.7	0.5007	6e-05	0.50088	9e-05	8.663	1.0245	BEB.wgs.coriell_phase3_samples.20121126.snps.affy_6.genotypes.vcf.gz	PASS	2013-05-16 10:20:22	/nfs/1000g-archive/vol1/ftp/data/HG03941/alignment/HG03941.mapped.ILLUMINA.bwa.BEB.low_coverage.20121211.bam		HG03941.mapped.ILLUMINA.bwa.BEB.low_coverage.20121211.bam
17347	HG02260.mapped.ILLUMINA.bwa.PEL.low_coverage.20130415.bam	HG02260	1	ALL	BAM	0.00373	0.00374	1304517	9.47	0.50116	0.00021	0.50153	0.00029	9.476	1.0005	PEL.omni_wg_2141_filtered.vcf.gz	PASS	2013-04-30 20:31:50	/nfs/1000g-archive/vol1/ftp/data/HG02260/alignment/HG02260.mapped.ILLUMINA.bwa.PEL.low_coverage.20130415.bam		HG02260.mapped.ILLUMINA.bwa.PEL.low_coverage.20130415.bam
47272	HG00733.mapped.ILLUMINA.bwa.PUR.low_coverage.20130415.bam	HG00733	0	ALL	BAM	0.00372	0.00375	1558284	17.86	0.50145	0.00037	0.50285	0.00029	17.89	0.9978	PUR.omni_wg_2141_filtered.vcf.gz	PASS	2013-05-10 16:17:57	/nfs/1000g-archive/vol1/ftp/data/HG00733/alignment/HG00733.mapped.ILLUMINA.bwa.PUR.low_coverage.20130415.bam		HG00733.mapped.ILLUMINA.bwa.PUR.low_coverage.20130415.bam
22465	HG03757.mapped.ILLUMINA.bwa.STU.low_coverage.20130415.bam	HG03757	1	ALL	BAM	0.00372	0.00349	779732	11.03	0.50113	0.00032	0.50181	0.00037	11.064	0.9961	STU.wgs.coriell_phase3_samples.20121126.snps.affy_6.genotypes.vcf.gz	PASS	2013-05-03 10:34:08	/nfs/1000g-archive/vol1/ftp/data/HG03757/alignment/HG03757.mapped.ILLUMINA.bwa.STU.low_coverage.20130415.bam		HG03757.mapped.ILLUMINA.bwa.STU.low_coverage.20130415.bam
25442	HG03904.mapped.ILLUMINA.bwa.BEB.low_coverage.20130415.bam	HG03904	0	ALL	BAM	0.00372	0.00287	783628	4.44	0.50197	0.00019	0.50141	0.00024	4.446	1.0012	BEB.wgs.coriell_phase3_samples.20121126.snps.affy_6.genotypes.vcf.gz	PASS	2013-05-05 05:59:54	/nfs/1000g-archive/vol1/ftp/data/HG03904/alignment/HG03904.mapped.ILLUMINA.bwa.BEB.low_coverage.20130415.bam		HG03904.mapped.ILLUMINA.bwa.BEB.low_coverage.20130415.bam
55345	HG00345.mapped.ILLUMINA.bwa.FIN.low_coverage.20130415.bam	HG00345	1	ALL	BAM	0.00372	0	712928	11.01	0.50161	0.00016	0	0	0	0	FIN.wgs.coriell_phase3_samples.20121126.snps.affy_6.genotypes.vcf.gz	PASS	2013-05-13 23:00:52	/nfs/1000g-archive/vol1/ftp/data/HG00345/alignment/HG00345.mapped.ILLUMINA.bwa.FIN.low_coverage.20130415.bam		HG00345.mapped.ILLUMINA.bwa.FIN.low_coverage.20130415.bam
56942	HG03109.mapped.ILLUMINA.bwa.ESN.low_coverage.20130415.bam	HG03109	1	ALL	BAM	0.00371	0.00412	835395	8.83	0.50105	9e-05	0.50207	7e-05	8.81	1.0223	ESN.wgs.coriell_phase3_samples.20121126.snps.affy_6.genotypes.vcf.gz	PASS	2013-05-14 02:00:17	/nfs/1000g-archive/vol1/ftp/data/HG03109/alignment/HG03109.mapped.ILLUMINA.bwa.ESN.low_coverage.20130415.bam		HG03109.mapped.ILLUMINA.bwa.ESN.low_coverage.20130415.bam
41770	HG01095.mapped.ILLUMINA.bwa.PUR.low_coverage.20130415.bam	HG01095	1	ALL	BAM	0.00371	0.00371	1558284	9.91	0.50201	0.0004	0.50283	0.00046	9.937	0.9945	PUR.omni_wg_2141_filtered.vcf.gz	PASS	2013-05-10 10:27:58	/nfs/1000g-archive/vol1/ftp/data/HG01095/alignment/HG01095.mapped.ILLUMINA.bwa.PUR.low_coverage.20130415.bam		HG01095.mapped.ILLUMINA.bwa.PUR.low_coverage.20130415.bam
12164	HG03258.mapped.ILLUMINA.bwa.GWD.low_coverage.20121211.bam	HG03258	1	ALL	BAM	0.0037	0.00415	840560	8.84	0.50092	0.00018	0.50078	0.00015	8.816	1.0236	GWD.wgs.coriell_phase3_samples.20121126.snps.affy_6.genotypes.vcf.gz	PASS	2013-05-16 16:34:52	/nfs/1000g-archive/vol1/ftp/data/HG03258/alignment/HG03258.mapped.ILLUMINA.bwa.GWD.low_coverage.20121211.bam		HG03258.mapped.ILLUMINA.bwa.GWD.low_coverage.20121211.bam
8079	HG00133.mapped.ILLUMINA.bwa.GBR.low_coverage.20120522.bam	HG00133	1	ALL	BAM	0.0037	0.00365	1389642	8.56	0.50228	0.00029	0.50249	0.00036	8.576	0.9973	GBR.omni_wg_2141_filtered.vcf.gz	PASS	2013-05-17 03:13:57	/nfs/1000g-archive/vol1/ftp/data/HG00133/alignment/HG00133.mapped.ILLUMINA.bwa.GBR.low_coverage.20120522.bam		HG00133.mapped.ILLUMINA.bwa.GBR.low_coverage.20120522.bam
16409	HG01459.mapped.ILLUMINA.bwa.CLM.low_coverage.20130415.bam	HG01459	1	ALL	BAM	0.0037	0.00326	832763	7.72	0.50037	7e-05	0.50125	7e-05	7.731	0.9993	CLM.wgs.coriell_phase3_samples.20121126.snps.affy_6.genotypes.vcf.gz	PASS	2013-04-30 19:00:07	/nfs/1000g-archive/vol1/ftp/data/HG01459/alignment/HG01459.mapped.ILLUMINA.bwa.CLM.low_coverage.20130415.bam		HG01459.mapped.ILLUMINA.bwa.CLM.low_coverage.20130415.bam
55266	HG01205.mapped.ILLUMINA.bwa.PUR.low_coverage.20130415.bam	HG01205	1	ALL	BAM	0.0037	0	854341	11.62	0.5027	0.00035	0	0	0	0	PUR.wgs.coriell_phase3_samples.20121126.snps.affy_6.genotypes.vcf.gz	PASS	2013-05-13 22:52:20	/nfs/1000g-archive/vol1/ftp/data/HG01205/alignment/HG01205.mapped.ILLUMINA.bwa.PUR.low_coverage.20130415.bam		HG01205.mapped.ILLUMINA.bwa.PUR.low_coverage.20130415.bam
25991	NA18502.mapped.ILLUMINA.bwa.YRI.low_coverage.20130415.bam	NA18502	1	ALL	BAM	0.0037	0	887456	5.22	0.49794	0.00034	0	0	0	0	ALL.wgs.coriell_phase3_samples.20121126.snps.affy_6.genotypes.vcf.gz	PASS	2013-05-05 07:22:46	/nfs/1000g-archive/vol1/ftp/data/NA18502/alignment/NA18502.mapped.ILLUMINA.bwa.YRI.low_coverage.20130415.bam		NA18502.mapped.ILLUMINA.bwa.YRI.low_coverage.20130415.bam
6944	HG01187.mapped.ILLUMINA.bwa.PUR.low_coverage.20120522.bam	HG01187	1	ALL	BAM	0.00369	0.00404	1558284	5.75	0.50269	0.0004	0.50309	0.00039	5.761	0.9963	PUR.omni_wg_2141_filtered.vcf.gz	PASS	2013-05-17 11:02:53	/nfs/1000g-archive/vol1/ftp/data/HG01187/alignment/HG01187.mapped.ILLUMINA.bwa.PUR.low_coverage.20120522.bam		HG01187.mapped.ILLUMINA.bwa.PUR.low_coverage.20120522.bam
62517	HG00100.mapped.ILLUMINA.bwa.GBR.low_coverage.20130415.bam	HG00100	1	ALL	BAM	0.00369	0.00374	1389642	12.73	0.50067	0.00022	0.50121	0.00029	12.759	0.9985	GBR.omni_wg_2141_filtered.vcf.gz	PASS	2013-05-14 06:03:37	/nfs/1000g-archive/vol1/ftp/data/HG00100/alignment/HG00100.mapped.ILLUMINA.bwa.GBR.low_coverage.20130415.bam		HG00100.mapped.ILLUMINA.bwa.GBR.low_coverage.20130415.bam
13123	HG03279.mapped.ILLUMINA.bwa.ESN.low_coverage.20121211.bam	HG03279	1	ALL	BAM	0.00369	0.00374	835395	9.03	0.50024	0.0001	0.49997	0.0002	9.033	1.0008	ESN.wgs.coriell_phase3_samples.20121126.snps.affy_6.genotypes.vcf.gz	PASS	2013-05-16 18:55:23	/nfs/1000g-archive/vol1/ftp/data/HG03279/alignment/HG03279.mapped.ILLUMINA.bwa.ESN.low_coverage.20121211.bam		HG03279.mapped.ILLUMINA.bwa.ESN.low_coverage.20121211.bam
28468	NA11892.mapped.ILLUMINA.bwa.CEU.low_coverage.20130415.bam	NA11892	1	ALL	BAM	0.00369	0.00372	1400785	7.72	0.50151	0.00032	0.50227	0.00033	7.731	0.9994	CEU.omni_wg_2141_filtered.vcf.gz	PASS	2013-05-05 11:45:37	/nfs/1000g-archive/vol1/ftp/data/NA11892/alignment/NA11892.mapped.ILLUMINA.bwa.CEU.low_coverage.20130415.bam		NA11892.mapped.ILLUMINA.bwa.CEU.low_coverage.20130415.bam
12353	HG02787.mapped.ILLUMINA.bwa.PJL.low_coverage.20121211.bam	HG02787	1	ALL	BAM	0.00369	0	1753219	8.71	0.50161	0.00017	0	0	0	0	ALL.omni_wg_2141_filtered.vcf.gz	PASS	2013-05-17 05:05:15	/nfs/1000g-archive/vol1/ftp/data/HG02787/alignment/HG02787.mapped.ILLUMINA.bwa.PJL.low_coverage.20121211.bam		HG02787.mapped.ILLUMINA.bwa.PJL.low_coverage.20121211.bam
22359	HG03741.mapped.ILLUMINA.bwa.STU.low_coverage.20130415.bam	HG03741	1	ALL	BAM	0.00368	0.00373	779732	12.63	0.5006	0.00021	0.50104	0.00018	12.643	0.9995	STU.wgs.coriell_phase3_samples.20121126.snps.affy_6.genotypes.vcf.gz	PASS	2013-05-03 10:32:10	/nfs/1000g-archive/vol1/ftp/data/HG03741/alignment/HG03741.mapped.ILLUMINA.bwa.STU.low_coverage.20130415.bam		HG03741.mapped.ILLUMINA.bwa.STU.low_coverage.20130415.bam
8179	HG00242.mapped.ILLUMINA.bwa.GBR.low_coverage.20120522.bam	HG00242	1	ALL	BAM	0.00368	0.00328	1389642	3.73	0.50185	0.00068	0.50241	0.00058	3.731	1.0036	GBR.omni_wg_2141_filtered.vcf.gz	PASS	2013-05-17 03:34:59	/nfs/1000g-archive/vol1/ftp/data/HG00242/alignment/HG00242.mapped.ILLUMINA.bwa.GBR.low_coverage.20120522.bam		HG00242.mapped.ILLUMINA.bwa.GBR.low_coverage.20120522.bam
12839	HG02611.mapped.ILLUMINA.bwa.GWD.low_coverage.20121211.bam	HG02611	1	ALL	BAM	0.00368	0	1753219	11.13	0.50073	0.00033	0	0	0	0	ALL.omni_wg_2141_filtered.vcf.gz	PASS	2013-05-17 12:57:48	/nfs/1000g-archive/vol1/ftp/data/HG02611/alignment/HG02611.mapped.ILLUMINA.bwa.GWD.low_coverage.20121211.bam		HG02611.mapped.ILLUMINA.bwa.GWD.low_coverage.20121211.bam
27254	HG03844.mapped.ILLUMINA.bwa.STU.low_coverage.20130415.bam	HG03844	1	ALL	BAM	0.00367	0.00406	779732	10.87	0.50088	0.00015	0.50092	0.00018	10.84	1.0214	STU.wgs.coriell_phase3_samples.20121126.snps.affy_6.genotypes.vcf.gz	PASS	2013-05-05 09:16:17	/nfs/1000g-archive/vol1/ftp/data/HG03844/alignment/HG03844.mapped.ILLUMINA.bwa.STU.low_coverage.20130415.bam		HG03844.mapped.ILLUMINA.bwa.STU.low_coverage.20130415.bam
35234	NA19446.mapped.ILLUMINA.bwa.LWK.low_coverage.20130415.bam	NA19446	1	ALL	BAM	0.00367	0.00372	1570264	6.58	0.50189	0.00055	0.50213	0.00057	6.59	0.998	LWK.omni_wg_2141_filtered.vcf.gz	PASS	2013-05-08 07:18:32	/nfs/1000g-archive/vol1/ftp/data/NA19446/alignment/NA19446.mapped.ILLUMINA.bwa.LWK.low_coverage.20130415.bam		NA19446.mapped.ILLUMINA.bwa.LWK.low_coverage.20130415.bam
58722	HG03099.mapped.ILLUMINA.bwa.ESN.low_coverage.20130415.bam	HG03099	1	ALL	BAM	0.00367	0.00356	835395	10.13	0.50118	0.00012	0.50098	0.00016	10.15	0.9976	ESN.wgs.coriell_phase3_samples.20121126.snps.affy_6.genotypes.vcf.gz	PASS	2013-05-14 03:05:43	/nfs/1000g-archive/vol1/ftp/data/HG03099/alignment/HG03099.mapped.ILLUMINA.bwa.ESN.low_coverage.20130415.bam		HG03099.mapped.ILLUMINA.bwa.ESN.low_coverage.20130415.bam
6572	NA20851.mapped.ILLUMINA.bwa.GIH.low_coverage.20120522.bam	NA20851	1	ALL	BAM	0.00367	0.00304	1368816	3.52	0.50273	0.00018	0.50339	0.00058	3.533	0.997	GIH.omni_wg_2141_filtered.vcf.gz	PASS	2013-05-16 22:56:54	/nfs/1000g-archive/vol1/ftp/data/NA20851/alignment/NA20851.mapped.ILLUMINA.bwa.GIH.low_coverage.20120522.bam		NA20851.mapped.ILLUMINA.bwa.GIH.low_coverage.20120522.bam
12270	HG02784.mapped.ILLUMINA.bwa.PJL.low_coverage.20121211.bam	HG02784	1	ALL	BAM	0.00367	0	1753219	8.83	0.50238	0.00035	0	0	0	0	ALL.omni_wg_2141_filtered.vcf.gz	PASS	2013-05-17 16:31:03	/nfs/1000g-archive/vol1/ftp/data/HG02784/alignment/HG02784.mapped.ILLUMINA.bwa.PJL.low_coverage.20121211.bam		HG02784.mapped.ILLUMINA.bwa.PJL.low_coverage.20121211.bam
12899	NA19012.mapped.ILLUMINA.bwa.JPT.low_coverage.20120522.bam	NA19012	1	ALL	BAM	0.00367	0	887456	5.59	0.5014	0.00028	0	0	0	0	ALL.wgs.coriell_phase3_samples.20121126.snps.affy_6.genotypes.vcf.gz	PASS	2013-05-16 08:00:16	/nfs/1000g-archive/vol1/ftp/data/NA19012/alignment/NA19012.mapped.ILLUMINA.bwa.JPT.low_coverage.20120522.bam		NA19012.mapped.ILLUMINA.bwa.JPT.low_coverage.20120522.bam
25580	HG04135.mapped.ILLUMINA.bwa.BEB.low_coverage.20130415.bam	HG04135	0	ALL	BAM	0.00366	0.00356	783628	4.68	0.50026	0.00033	0.50233	0.00033	4.685	0.9998	BEB.wgs.coriell_phase3_samples.20121126.snps.affy_6.genotypes.vcf.gz	PASS	2013-05-05 06:05:09	/nfs/1000g-archive/vol1/ftp/data/HG04135/alignment/HG04135.mapped.ILLUMINA.bwa.BEB.low_coverage.20130415.bam		HG04135.mapped.ILLUMINA.bwa.BEB.low_coverage.20130415.bam
12178	HG00410.mapped.ILLUMINA.bwa.CHS.low_coverage.20121211.bam	HG00410	1	ALL	BAM	0.00366	0	1243376	9.89	0.50305	0.00069	0	0	0	0	CHS.omni_wg_2141_filtered.vcf.gz	PASS	2013-05-17 12:24:21	/nfs/1000g-archive/vol1/ftp/data/HG00410/alignment/HG00410.mapped.ILLUMINA.bwa.CHS.low_coverage.20121211.bam		HG00410.mapped.ILLUMINA.bwa.CHS.low_coverage.20121211.bam
11110	HG02407.mapped.ILLUMINA.bwa.CDX.low_coverage.20120522.bam	HG02407	1	ALL	BAM	0.00366	0	665690	6.22	0.50147	0.00065	0	0	0	0	CDX.wgs.coriell_phase3_samples.20121126.snps.affy_6.genotypes.vcf.gz	PASS	2013-05-16 06:36:16	/nfs/1000g-archive/vol1/ftp/data/HG02407/alignment/HG02407.mapped.ILLUMINA.bwa.CDX.low_coverage.20120522.bam		HG02407.mapped.ILLUMINA.bwa.CDX.low_coverage.20120522.bam
42097	HG03743.mapped.ILLUMINA.bwa.STU.low_coverage.20130415.bam	HG03743	1	ALL	BAM	0.00365	0.00412	779732	9.42	0.50041	0.00013	0.50105	0.00012	9.386	1.0226	STU.wgs.coriell_phase3_samples.20121126.snps.affy_6.genotypes.vcf.gz	PASS	2013-05-10 10:44:30	/nfs/1000g-archive/vol1/ftp/data/HG03743/alignment/HG03743.mapped.ILLUMINA.bwa.STU.low_coverage.20130415.bam		HG03743.mapped.ILLUMINA.bwa.STU.low_coverage.20130415.bam
12871	HG02973.mapped.ILLUMINA.bwa.ESN.low_coverage.20121211.bam	HG02973	1	ALL	BAM	0.00365	0.00411	835395	9.89	0.50207	0.0001	0.50161	0.00011	9.868	1.0223	ESN.wgs.coriell_phase3_samples.20121126.snps.affy_6.genotypes.vcf.gz	PASS	2013-05-16 15:43:16	/nfs/1000g-archive/vol1/ftp/data/HG02973/alignment/HG02973.mapped.ILLUMINA.bwa.ESN.low_coverage.20121211.bam		HG02973.mapped.ILLUMINA.bwa.ESN.low_coverage.20121211.bam
40944	HG03815.mapped.ILLUMINA.bwa.BEB.low_coverage.20130415.bam	HG03815	1	ALL	BAM	0.00365	0.00384	783628	8.93	0.50232	0.00035	0.50198	0.00033	8.917	1.0179	BEB.wgs.coriell_phase3_samples.20121126.snps.affy_6.genotypes.vcf.gz	PASS	2013-05-10 09:40:17	/nfs/1000g-archive/vol1/ftp/data/HG03815/alignment/HG03815.mapped.ILLUMINA.bwa.BEB.low_coverage.20130415.bam		HG03815.mapped.ILLUMINA.bwa.BEB.low_coverage.20130415.bam
58906	HG03123.mapped.ILLUMINA.bwa.ESN.low_coverage.20130415.bam	HG03123	1	ALL	BAM	0.00365	0.00364	835395	9.76	0.50256	0.00022	0.50214	0.00022	9.79	0.9989	ESN.wgs.coriell_phase3_samples.20121126.snps.affy_6.genotypes.vcf.gz	PASS	2013-05-14 03:13:13	/nfs/1000g-archive/vol1/ftp/data/HG03123/alignment/HG03123.mapped.ILLUMINA.bwa.ESN.low_coverage.20130415.bam		HG03123.mapped.ILLUMINA.bwa.ESN.low_coverage.20130415.bam
50783	NA20589.mapped.ILLUMINA.bwa.TSI.low_coverage.20130415.bam	NA20589	1	ALL	BAM	0.00365	0.0036	1402149	7.14	0.50179	0.00036	0.50191	0.00038	7.153	0.9989	TSI.omni_wg_2141_filtered.vcf.gz	PASS	2013-05-11 00:00:39	/nfs/1000g-archive/vol1/ftp/data/NA20589/alignment/NA20589.mapped.ILLUMINA.bwa.TSI.low_coverage.20130415.bam		NA20589.mapped.ILLUMINA.bwa.TSI.low_coverage.20130415.bam
10478	HG00117.mapped.ILLUMINA.bwa.GBR.low_coverage.20120522.bam	HG00117	1	ALL	BAM	0.00364	0.00504	1389642	5.38	0.50317	0.00044	0.50183	0.0004	5.394	0.9971	GBR.omni_wg_2141_filtered.vcf.gz	PASS	2013-05-17 02:11:04	/nfs/1000g-archive/vol1/ftp/data/HG00117/alignment/HG00117.mapped.ILLUMINA.bwa.GBR.low_coverage.20120522.bam		HG00117.mapped.ILLUMINA.bwa.GBR.low_coverage.20120522.bam
12528	HG02733.mapped.ILLUMINA.bwa.PJL.low_coverage.20121211.bam	HG02733	1	ALL	BAM	0.00363	0.00382	781539	9.6	0.50112	0.00034	0.50085	0.00031	9.573	1.0215	PJL.wgs.coriell_phase3_samples.20121126.snps.affy_6.genotypes.vcf.gz	PASS	2013-05-16 23:22:52	/nfs/1000g-archive/vol1/ftp/data/HG02733/alignment/HG02733.mapped.ILLUMINA.bwa.PJL.low_coverage.20121211.bam		HG02733.mapped.ILLUMINA.bwa.PJL.low_coverage.20121211.bam
12628	HG02574.mapped.ILLUMINA.bwa.GWD.low_coverage.20121211.bam	HG02574	1	ALL	BAM	0.00363	0.00355	840560	8.52	0.50141	0.00037	0.50115	0.00034	8.533	0.9977	GWD.wgs.coriell_phase3_samples.20121126.snps.affy_6.genotypes.vcf.gz	PASS	2013-05-16 15:34:10	/nfs/1000g-archive/vol1/ftp/data/HG02574/alignment/HG02574.mapped.ILLUMINA.bwa.GWD.low_coverage.20121211.bam		HG02574.mapped.ILLUMINA.bwa.GWD.low_coverage.20121211.bam
12209	HG03033.mapped.ILLUMINA.bwa.GWD.low_coverage.20121211.bam	HG03033	0	ALL	BAM	0.00362	0.00413	840560	6.87	0.50027	0.00029	0.50005	0.00032	6.842	1.0242	GWD.wgs.coriell_phase3_samples.20121126.snps.affy_6.genotypes.vcf.gz	PASS	2013-05-16 09:04:30	/nfs/1000g-archive/vol1/ftp/data/HG03033/alignment/HG03033.mapped.ILLUMINA.bwa.GWD.low_coverage.20121211.bam		HG03033.mapped.ILLUMINA.bwa.GWD.low_coverage.20121211.bam
12829	HG03085.mapped.ILLUMINA.bwa.MSL.low_coverage.20121211.bam	HG03085	1	ALL	BAM	0.00362	0.00357	838168	9.13	0.50035	0.00013	0.50074	0.00013	9.154	0.9967	MSL.wgs.coriell_phase3_samples.20121126.snps.affy_6.genotypes.vcf.gz	PASS	2013-05-16 16:37:15	/nfs/1000g-archive/vol1/ftp/data/HG03085/alignment/HG03085.mapped.ILLUMINA.bwa.MSL.low_coverage.20121211.bam		HG03085.mapped.ILLUMINA.bwa.MSL.low_coverage.20121211.bam
57068	HG03773.mapped.ILLUMINA.bwa.ITU.low_coverage.20130422.bam	HG03773	1	ALL	BAM	0.00361	0.00385	781365	10.77	0.50041	0.00019	0.50044	0.0002	10.734	1.0217	ITU.wgs.coriell_phase3_samples.20121126.snps.affy_6.genotypes.vcf.gz	PASS	2013-05-14 02:06:39	/nfs/1000g-archive/vol1/ftp/data/HG03773/alignment/HG03773.mapped.ILLUMINA.bwa.ITU.low_coverage.20130422.bam		HG03773.mapped.ILLUMINA.bwa.ITU.low_coverage.20130422.bam
17399	HG02024.mapped.ILLUMINA.bwa.KHV.low_coverage.20130415.bam	HG02024	0	ALL	BAM	0.00361	0.00353	1241587	10.51	0.50257	0.00055	0.50256	0.00057	10.539	0.9963	KHV.omni_wg_2141_filtered.vcf.gz	PASS	2013-04-30 21:10:27	/nfs/1000g-archive/vol1/ftp/data/HG02024/alignment/HG02024.mapped.ILLUMINA.bwa.KHV.low_coverage.20130415.bam		HG02024.mapped.ILLUMINA.bwa.KHV.low_coverage.20130415.bam
26016	HG04106.mapped.ILLUMINA.bwa.STU.low_coverage.20130415.bam	HG04106	1	ALL	BAM	0.0036	0.00445	779732	6.11	0.50024	0.0001	0.50054	0.00014	6.125	0.9986	STU.wgs.coriell_phase3_samples.20121126.snps.affy_6.genotypes.vcf.gz	PASS	2013-05-05 07:23:21	/nfs/1000g-archive/vol1/ftp/data/HG04106/alignment/HG04106.mapped.ILLUMINA.bwa.STU.low_coverage.20130415.bam		HG04106.mapped.ILLUMINA.bwa.STU.low_coverage.20130415.bam
9646	NA19236.mapped.ILLUMINA.bwa.YRI.low_coverage.20120522.bam	NA19236	1	ALL	BAM	0.0036	0.0039	1559108	4.63	0.5027	0.00081	0.50344	0.00076	4.645	0.9953	YRI.omni_wg_2141_filtered.vcf.gz	PASS	2013-05-17 01:43:25	/nfs/1000g-archive/vol1/ftp/data/NA19236/alignment/NA19236.mapped.ILLUMINA.bwa.YRI.low_coverage.20120522.bam		NA19236.mapped.ILLUMINA.bwa.YRI.low_coverage.20120522.bam
16545	HG00121.mapped.ILLUMINA.bwa.GBR.low_coverage.20130415.bam	HG00121	1	ALL	BAM	0.0036	0.00387	1389642	6.46	0.50157	0.0002	0.50238	0.00025	6.471	0.9996	GBR.omni_wg_2141_filtered.vcf.gz	PASS	2013-04-30 19:09:42	/nfs/1000g-archive/vol1/ftp/data/HG00121/alignment/HG00121.mapped.ILLUMINA.bwa.GBR.low_coverage.20130415.bam		HG00121.mapped.ILLUMINA.bwa.GBR.low_coverage.20130415.bam
57806	HG02772.mapped.ILLUMINA.bwa.GWD.low_coverage.20130415.bam	HG02772	1	ALL	BAM	0.0036	0.0035	840560	8.66	0.50103	8e-05	0.50123	8e-05	8.672	1	GWD.wgs.coriell_phase3_samples.20121126.snps.affy_6.genotypes.vcf.gz	PASS	2013-05-14 02:42:36	/nfs/1000g-archive/vol1/ftp/data/HG02772/alignment/HG02772.mapped.ILLUMINA.bwa.GWD.low_coverage.20130415.bam		HG02772.mapped.ILLUMINA.bwa.GWD.low_coverage.20130415.bam
9090	HG01492.mapped.ILLUMINA.bwa.CLM.low_coverage.20120522.bam	HG01492	1	ALL	BAM	0.0036	0	832763	5.4	0.50337	0.00044	0	0	0	0	CLM.wgs.coriell_phase3_samples.20121126.snps.affy_6.genotypes.vcf.gz	PASS	2013-05-16 12:29:42	/nfs/1000g-archive/vol1/ftp/data/HG01492/alignment/HG01492.mapped.ILLUMINA.bwa.CLM.low_coverage.20120522.bam		HG01492.mapped.ILLUMINA.bwa.CLM.low_coverage.20120522.bam
11786	HG02600.mapped.ILLUMINA.bwa.PJL.low_coverage.20121211.bam	HG02600	1	ALL	BAM	0.0036	0	1753219	9.07	0.50139	0.00018	0	0	0	0	ALL.omni_wg_2141_filtered.vcf.gz	PASS	2013-05-17 11:15:20	/nfs/1000g-archive/vol1/ftp/data/HG02600/alignment/HG02600.mapped.ILLUMINA.bwa.PJL.low_coverage.20121211.bam		HG02600.mapped.ILLUMINA.bwa.PJL.low_coverage.20121211.bam
12775	HG02727.mapped.ILLUMINA.bwa.PJL.low_coverage.20121211.bam	HG02727	1	ALL	BAM	0.0036	0	1753219	7.93	0.50094	0.00044	0	0	0	0	ALL.omni_wg_2141_filtered.vcf.gz	PASS	2013-05-17 07:14:27	/nfs/1000g-archive/vol1/ftp/data/HG02727/alignment/HG02727.mapped.ILLUMINA.bwa.PJL.low_coverage.20121211.bam		HG02727.mapped.ILLUMINA.bwa.PJL.low_coverage.20121211.bam
42081	HG03793.mapped.ILLUMINA.bwa.BEB.low_coverage.20130415.bam	HG03793	1	ALL	BAM	0.0036	0	1753219	8.51	0.50297	0.0004	0	0	0	0	ALL.omni_wg_2141_filtered.vcf.gz	PASS	2013-05-10 10:44:29	/nfs/1000g-archive/vol1/ftp/data/HG03793/alignment/HG03793.mapped.ILLUMINA.bwa.BEB.low_coverage.20130415.bam		HG03793.mapped.ILLUMINA.bwa.BEB.low_coverage.20130415.bam
12417	HG03385.mapped.ILLUMINA.bwa.MSL.low_coverage.20121211.bam	HG03385	1	ALL	BAM	0.00359	0.00446	838168	5.3	0.50102	7e-05	0.50123	0.00012	5.277	1.0252	MSL.wgs.coriell_phase3_samples.20121126.snps.affy_6.genotypes.vcf.gz	PASS	2013-05-16 10:07:58	/nfs/1000g-archive/vol1/ftp/data/HG03385/alignment/HG03385.mapped.ILLUMINA.bwa.MSL.low_coverage.20121211.bam		HG03385.mapped.ILLUMINA.bwa.MSL.low_coverage.20121211.bam
10683	HG02337.mapped.ILLUMINA.bwa.ACB.low_coverage.20120522.bam	HG02337	1	ALL	BAM	0.00359	0.00411	1597764	6.02	0.50139	0.00054	0.5019	0.00054	6.014	1.0052	ACB.omni_wg_2141_filtered.vcf.gz	PASS	2013-05-17 00:29:55	/nfs/1000g-archive/vol1/ftp/data/HG02337/alignment/HG02337.mapped.ILLUMINA.bwa.ACB.low_coverage.20120522.bam		HG02337.mapped.ILLUMINA.bwa.ACB.low_coverage.20120522.bam
12256	HG02756.mapped.ILLUMINA.bwa.GWD.low_coverage.20121211.bam	HG02756	1	ALL	BAM	0.00359	0.00401	840560	9.02	0.50034	0.00016	0.50074	0.00019	9.005	1.0207	GWD.wgs.coriell_phase3_samples.20121126.snps.affy_6.genotypes.vcf.gz	PASS	2013-05-16 19:29:47	/nfs/1000g-archive/vol1/ftp/data/HG02756/alignment/HG02756.mapped.ILLUMINA.bwa.GWD.low_coverage.20121211.bam		HG02756.mapped.ILLUMINA.bwa.GWD.low_coverage.20121211.bam
13161	HG02461.mapped.ILLUMINA.bwa.GWD.low_coverage.20121211.bam	HG02461	1	ALL	BAM	0.00359	0.00373	840560	9.05	0.50144	0.00032	0.50074	0.00037	9.018	1.0239	GWD.wgs.coriell_phase3_samples.20121126.snps.affy_6.genotypes.vcf.gz	PASS	2013-05-16 18:46:17	/nfs/1000g-archive/vol1/ftp/data/HG02461/alignment/HG02461.mapped.ILLUMINA.bwa.GWD.low_coverage.20121211.bam		HG02461.mapped.ILLUMINA.bwa.GWD.low_coverage.20121211.bam
11068	HG01101.mapped.ILLUMINA.bwa.PUR.low_coverage.20120522.bam	HG01101	1	ALL	BAM	0.00359	0	854341	11.39	0.50052	8e-05	0	0	0	0	PUR.wgs.coriell_phase3_samples.20121126.snps.affy_6.genotypes.vcf.gz	PASS	2013-05-16 17:51:24	/nfs/1000g-archive/vol1/ftp/data/HG01101/alignment/HG01101.mapped.ILLUMINA.bwa.PUR.low_coverage.20120522.bam		HG01101.mapped.ILLUMINA.bwa.PUR.low_coverage.20120522.bam
13074	HG02771.mapped.ILLUMINA.bwa.GWD.low_coverage.20121211.bam	HG02771	1	ALL	BAM	0.00358	0.00432	840560	9.25	0.5001	0.00016	0.50045	0.00011	9.23	1.0221	GWD.wgs.coriell_phase3_samples.20121126.snps.affy_6.genotypes.vcf.gz	PASS	2013-05-16 14:10:46	/nfs/1000g-archive/vol1/ftp/data/HG02771/alignment/HG02771.mapped.ILLUMINA.bwa.GWD.low_coverage.20121211.bam		HG02771.mapped.ILLUMINA.bwa.GWD.low_coverage.20121211.bam
9211	NA18968.mapped.ILLUMINA.bwa.JPT.low_coverage.20120522.bam	NA18968	1	ALL	BAM	0.00358	0.00353	1243522	9.84	0.50156	0.00064	0.50217	0.00068	9.852	0.9994	JPT.omni_wg_2141_filtered.vcf.gz	PASS	2013-05-17 08:23:44	/nfs/1000g-archive/vol1/ftp/data/NA18968/alignment/NA18968.mapped.ILLUMINA.bwa.JPT.low_coverage.20120522.bam		NA18968.mapped.ILLUMINA.bwa.JPT.low_coverage.20120522.bam
12936	HG00409.mapped.ILLUMINA.bwa.CHS.low_coverage.20121211.bam	HG00409	1	ALL	BAM	0.00358	0	1243376	8.91	0.50156	0.00064	0	0	0	0	CHS.omni_wg_2141_filtered.vcf.gz	PASS	2013-05-17 09:23:58	/nfs/1000g-archive/vol1/ftp/data/HG00409/alignment/HG00409.mapped.ILLUMINA.bwa.CHS.low_coverage.20121211.bam		HG00409.mapped.ILLUMINA.bwa.CHS.low_coverage.20121211.bam
11268	HG00675.mapped.ILLUMINA.bwa.CHS.low_coverage.20121211.bam	HG00675	1	ALL	BAM	0.00358	0	1243376	8.95	0.50156	0.0006	0	0	0	0	CHS.omni_wg_2141_filtered.vcf.gz	PASS	2013-05-16 23:32:23	/nfs/1000g-archive/vol1/ftp/data/HG00675/alignment/HG00675.mapped.ILLUMINA.bwa.CHS.low_coverage.20121211.bam		HG00675.mapped.ILLUMINA.bwa.CHS.low_coverage.20121211.bam
8350	NA18535.mapped.ILLUMINA.bwa.CHB.low_coverage.20120522.bam	NA18535	1	ALL	BAM	0.00357	0.00433	1252142	4.75	0.50355	0.00048	0.50289	0.00041	4.753	0.9991	CHB.omni_wg_2141_filtered.vcf.gz	PASS	2013-05-17 10:02:43	/nfs/1000g-archive/vol1/ftp/data/NA18535/alignment/NA18535.mapped.ILLUMINA.bwa.CHB.low_coverage.20120522.bam		NA18535.mapped.ILLUMINA.bwa.CHB.low_coverage.20120522.bam
21823	HG03708.mapped.ILLUMINA.bwa.PJL.low_coverage.20130415.bam	HG03708	1	ALL	BAM	0.00357	0	1753219	6.85	0.50047	0.00016	0	0	0	0	ALL.omni_wg_2141_filtered.vcf.gz	PASS	2013-05-03 08:30:51	/nfs/1000g-archive/vol1/ftp/data/HG03708/alignment/HG03708.mapped.ILLUMINA.bwa.PJL.low_coverage.20130415.bam		HG03708.mapped.ILLUMINA.bwa.PJL.low_coverage.20130415.bam
40703	HG03615.mapped.ILLUMINA.bwa.BEB.low_coverage.20130415.bam	HG03615	1	ALL	BAM	0.00356	0.00406	783628	10.25	0.5011	0.00024	0.50233	0.00028	10.252	1.0175	BEB.wgs.coriell_phase3_samples.20121126.snps.affy_6.genotypes.vcf.gz	PASS	2013-05-10 09:14:54	/nfs/1000g-archive/vol1/ftp/data/HG03615/alignment/HG03615.mapped.ILLUMINA.bwa.BEB.low_coverage.20130415.bam		HG03615.mapped.ILLUMINA.bwa.BEB.low_coverage.20130415.bam
12939	HG02789.mapped.ILLUMINA.bwa.PJL.low_coverage.20121211.bam	HG02789	1	ALL	BAM	0.00356	0.004	781539	9.46	0.50106	0.00028	0.50108	0.00027	9.416	1.0237	PJL.wgs.coriell_phase3_samples.20121126.snps.affy_6.genotypes.vcf.gz	PASS	2013-05-16 14:55:36	/nfs/1000g-archive/vol1/ftp/data/HG02789/alignment/HG02789.mapped.ILLUMINA.bwa.PJL.low_coverage.20121211.bam		HG02789.mapped.ILLUMINA.bwa.PJL.low_coverage.20121211.bam
12655	HG02702.mapped.ILLUMINA.bwa.GWD.low_coverage.20121211.bam	HG02702	1	ALL	BAM	0.00356	0.00396	840560	8.95	0.50108	0.00046	0.50125	0.00037	8.92	1.0244	GWD.wgs.coriell_phase3_samples.20121126.snps.affy_6.genotypes.vcf.gz	PASS	2013-05-16 15:48:07	/nfs/1000g-archive/vol1/ftp/data/HG02702/alignment/HG02702.mapped.ILLUMINA.bwa.GWD.low_coverage.20121211.bam		HG02702.mapped.ILLUMINA.bwa.GWD.low_coverage.20121211.bam
44057	HG03717.mapped.ILLUMINA.bwa.ITU.low_coverage.20130415.bam	HG03717	1	ALL	BAM	0.00356	0.00389	781365	8.31	0.50119	0.00011	0.50097	9e-05	8.327	0.9974	ITU.wgs.coriell_phase3_samples.20121126.snps.affy_6.genotypes.vcf.gz	PASS	2013-05-10 11:56:20	/nfs/1000g-archive/vol1/ftp/data/HG03717/alignment/HG03717.mapped.ILLUMINA.bwa.ITU.low_coverage.20130415.bam		HG03717.mapped.ILLUMINA.bwa.ITU.low_coverage.20130415.bam
25731	HG04150.mapped.ILLUMINA.bwa.BEB.low_coverage.20130415.bam	HG04150	0	ALL	BAM	0.00356	0.00318	783628	4.56	0.50142	0.0004	0.50088	0.00029	4.569	0.9983	BEB.wgs.coriell_phase3_samples.20121126.snps.affy_6.genotypes.vcf.gz	PASS	2013-05-05 06:21:19	/nfs/1000g-archive/vol1/ftp/data/HG04150/alignment/HG04150.mapped.ILLUMINA.bwa.BEB.low_coverage.20130415.bam		HG04150.mapped.ILLUMINA.bwa.BEB.low_coverage.20130415.bam
9310	HG01190.mapped.ILLUMINA.bwa.PUR.low_coverage.20120522.bam	HG01190	1	ALL	BAM	0.00355	0	854341	5.4	0.50151	0.0004	0	0	0	0	PUR.wgs.coriell_phase3_samples.20121126.snps.affy_6.genotypes.vcf.gz	PASS	2013-05-16 13:18:32	/nfs/1000g-archive/vol1/ftp/data/HG01190/alignment/HG01190.mapped.ILLUMINA.bwa.PUR.low_coverage.20120522.bam		HG01190.mapped.ILLUMINA.bwa.PUR.low_coverage.20120522.bam
12984	HG02634.mapped.ILLUMINA.bwa.GWD.low_coverage.20121211.bam	HG02634	1	ALL	BAM	0.00355	0	1753219	9.33	0.50065	0.00031	0	0	0	0	ALL.omni_wg_2141_filtered.vcf.gz	PASS	2013-05-16 21:23:45	/nfs/1000g-archive/vol1/ftp/data/HG02634/alignment/HG02634.mapped.ILLUMINA.bwa.GWD.low_coverage.20121211.bam		HG02634.mapped.ILLUMINA.bwa.GWD.low_coverage.20121211.bam
12558	HG03539.mapped.ILLUMINA.bwa.GWD.low_coverage.20121211.bam	HG03539	1	ALL	BAM	0.00355	0	1753219	5.7	0.49815	0.00088	0	0	0	0	ALL.omni_wg_2141_filtered.vcf.gz	PASS	2013-05-17 11:32:41	/nfs/1000g-archive/vol1/ftp/data/HG03539/alignment/HG03539.mapped.ILLUMINA.bwa.GWD.low_coverage.20121211.bam		HG03539.mapped.ILLUMINA.bwa.GWD.low_coverage.20121211.bam
26087	HG03854.mapped.ILLUMINA.bwa.STU.low_coverage.20130415.bam	HG03854	1	ALL	BAM	0.00355	0	1753219	6.83	0.50005	0.00016	0	0	0	0	ALL.omni_wg_2141_filtered.vcf.gz	PASS	2013-05-05 07:42:30	/nfs/1000g-archive/vol1/ftp/data/HG03854/alignment/HG03854.mapped.ILLUMINA.bwa.STU.low_coverage.20130415.bam		HG03854.mapped.ILLUMINA.bwa.STU.low_coverage.20130415.bam
34830	NA20520.mapped.ILLUMINA.bwa.TSI.low_coverage.20130415.bam	NA20520	1	ALL	BAM	0.00354	0.00355	1402149	6.51	0.50169	0.00034	0.5023	0.00037	6.517	0.999	TSI.omni_wg_2141_filtered.vcf.gz	PASS	2013-05-08 06:34:14	/nfs/1000g-archive/vol1/ftp/data/NA20520/alignment/NA20520.mapped.ILLUMINA.bwa.TSI.low_coverage.20130415.bam		NA20520.mapped.ILLUMINA.bwa.TSI.low_coverage.20130415.bam
27032	HG03797.mapped.ILLUMINA.bwa.BEB.low_coverage.20130415.bam	HG03797	0	ALL	BAM	0.00353	0.99832	783628	8.9	0.50169	0.00036	0.50349	0.0008	8.915	0.999	BEB.wgs.coriell_phase3_samples.20121126.snps.affy_6.genotypes.vcf.gz	POSSIBLE_SWAP	2013-05-05 08:52:32	/nfs/1000g-archive/vol1/ftp/data/HG03797/alignment/HG03797.mapped.ILLUMINA.bwa.BEB.low_coverage.20130415.bam		HG03797.mapped.ILLUMINA.bwa.BEB.low_coverage.20130415.bam
12933	HG03569.mapped.ILLUMINA.bwa.MSL.low_coverage.20121211.bam	HG03569	0	ALL	BAM	0.00353	0.00362	838168	6.07	0.50128	0.0002	0.50199	0.00023	6.076	0.9988	MSL.wgs.coriell_phase3_samples.20121126.snps.affy_6.genotypes.vcf.gz	PASS	2013-05-16 15:52:49	/nfs/1000g-archive/vol1/ftp/data/HG03569/alignment/HG03569.mapped.ILLUMINA.bwa.MSL.low_coverage.20121211.bam		HG03569.mapped.ILLUMINA.bwa.MSL.low_coverage.20121211.bam
8092	NA20894.mapped.ILLUMINA.bwa.GIH.low_coverage.20120522.bam	NA20894	1	ALL	BAM	0.00353	0.0035	1368816	7.84	0.50119	0.00017	0.50207	0.00035	7.85	1.001	GIH.omni_wg_2141_filtered.vcf.gz	PASS	2013-05-17 01:19:47	/nfs/1000g-archive/vol1/ftp/data/NA20894/alignment/NA20894.mapped.ILLUMINA.bwa.GIH.low_coverage.20120522.bam		NA20894.mapped.ILLUMINA.bwa.GIH.low_coverage.20120522.bam
13230	HG02733.mapped.ILLUMINA.bwa.PJL.low_coverage.20121211.bam	HG02733	1	ALL	BAM	0.00353	0	1753219	9.51	0.50119	0.00016	0	0	0	0	ALL.omni_wg_2141_filtered.vcf.gz	PASS	2013-05-17 06:08:14	/nfs/1000g-archive/vol1/ftp/data/HG02733/alignment/HG02733.mapped.ILLUMINA.bwa.PJL.low_coverage.20121211.bam		HG02733.mapped.ILLUMINA.bwa.PJL.low_coverage.20121211.bam
57931	HG03715.mapped.ILLUMINA.bwa.ITU.low_coverage.20130415.bam	HG03715	0	ALL	BAM	0.00352	0.00368	781365	9.57	0.50052	0.00017	0.50077	0.0002	9.54	1.021	ITU.wgs.coriell_phase3_samples.20121126.snps.affy_6.genotypes.vcf.gz	PASS	2013-05-14 02:44:35	/nfs/1000g-archive/vol1/ftp/data/HG03715/alignment/HG03715.mapped.ILLUMINA.bwa.ITU.low_coverage.20130415.bam		HG03715.mapped.ILLUMINA.bwa.ITU.low_coverage.20130415.bam
43739	HG03787.mapped.ILLUMINA.bwa.ITU.low_coverage.20130415.bam	HG03787	1	ALL	BAM	0.00352	0.00365	781365	9.25	0.50048	0.0002	0.5009	0.00019	9.268	0.9986	ITU.wgs.coriell_phase3_samples.20121126.snps.affy_6.genotypes.vcf.gz	PASS	2013-05-10 11:46:02	/nfs/1000g-archive/vol1/ftp/data/HG03787/alignment/HG03787.mapped.ILLUMINA.bwa.ITU.low_coverage.20130415.bam		HG03787.mapped.ILLUMINA.bwa.ITU.low_coverage.20130415.bam
16059	HG02502.mapped.ILLUMINA.bwa.ACB.low_coverage.20130415.bam	HG02502	1	ALL	BAM	0.00352	0.00257	849391	5.12	0.50057	0.00035	0.50106	0.00022	5.13	0.9965	ACB.wgs.coriell_phase3_samples.20121126.snps.affy_6.genotypes.vcf.gz	PASS	2013-04-30 18:30:57	/nfs/1000g-archive/vol1/ftp/data/HG02502/alignment/HG02502.mapped.ILLUMINA.bwa.ACB.low_coverage.20130415.bam		HG02502.mapped.ILLUMINA.bwa.ACB.low_coverage.20130415.bam
9719	HG02429.mapped.ILLUMINA.bwa.ACB.low_coverage.20120522.bam	HG02429	1	ALL	BAM	0.00352	0	849391	11.03	0.50078	0.00051	0	0	0	0	ACB.wgs.coriell_phase3_samples.20121126.snps.affy_6.genotypes.vcf.gz	PASS	2013-05-16 12:21:23	/nfs/1000g-archive/vol1/ftp/data/HG02429/alignment/HG02429.mapped.ILLUMINA.bwa.ACB.low_coverage.20120522.bam		HG02429.mapped.ILLUMINA.bwa.ACB.low_coverage.20120522.bam
42333	HG03615.mapped.ILLUMINA.bwa.BEB.low_coverage.20130415.bam	HG03615	1	ALL	BAM	0.00352	0	1753219	10.23	0.50192	0.00029	0	0	0	0	ALL.omni_wg_2141_filtered.vcf.gz	PASS	2013-05-10 10:54:46	/nfs/1000g-archive/vol1/ftp/data/HG03615/alignment/HG03615.mapped.ILLUMINA.bwa.BEB.low_coverage.20130415.bam		HG03615.mapped.ILLUMINA.bwa.BEB.low_coverage.20130415.bam
13093	HG03376.mapped.ILLUMINA.bwa.MSL.low_coverage.20121211.bam	HG03376	1	ALL	BAM	0.00351	0.00515	838168	4.55	0.50046	0.00019	0.50179	8e-05	4.54	1.0238	MSL.wgs.coriell_phase3_samples.20121126.snps.affy_6.genotypes.vcf.gz	PASS	2013-05-16 11:34:02	/nfs/1000g-archive/vol1/ftp/data/HG03376/alignment/HG03376.mapped.ILLUMINA.bwa.MSL.low_coverage.20121211.bam		HG03376.mapped.ILLUMINA.bwa.MSL.low_coverage.20121211.bam
13227	HG02464.mapped.ILLUMINA.bwa.GWD.low_coverage.20121211.bam	HG02464	1	ALL	BAM	0.00351	0	1753219	9.06	0.49971	0.00032	0	0	0	0	ALL.omni_wg_2141_filtered.vcf.gz	PASS	2013-05-17 08:20:13	/nfs/1000g-archive/vol1/ftp/data/HG02464/alignment/HG02464.mapped.ILLUMINA.bwa.GWD.low_coverage.20121211.bam		HG02464.mapped.ILLUMINA.bwa.GWD.low_coverage.20121211.bam
43664	HG03789.mapped.ILLUMINA.bwa.ITU.low_coverage.20130415.bam	HG03789	1	ALL	BAM	0.0035	0.00347	781365	8.66	0.50066	0.00014	0.50088	9e-05	8.675	0.9977	ITU.wgs.coriell_phase3_samples.20121126.snps.affy_6.genotypes.vcf.gz	PASS	2013-05-10 11:42:36	/nfs/1000g-archive/vol1/ftp/data/HG03789/alignment/HG03789.mapped.ILLUMINA.bwa.ITU.low_coverage.20130415.bam		HG03789.mapped.ILLUMINA.bwa.ITU.low_coverage.20130415.bam
29027	HG03844.mapped.ILLUMINA.bwa.STU.low_coverage.20130415.bam	HG03844	1	ALL	BAM	0.0035	0	1753219	10.83	0.50177	0.00019	0	0	0	0	ALL.omni_wg_2141_filtered.vcf.gz	PASS	2013-05-05 12:53:36	/nfs/1000g-archive/vol1/ftp/data/HG03844/alignment/HG03844.mapped.ILLUMINA.bwa.STU.low_coverage.20130415.bam		HG03844.mapped.ILLUMINA.bwa.STU.low_coverage.20130415.bam
33337	NA18606.mapped.ILLUMINA.bwa.CHB.low_coverage.20130415.bam	NA18606	1	ALL	BAM	0.00349	0.00406	1252142	8.67	0.50115	0.00015	0.50232	0.00022	8.683	0.9986	CHB.omni_wg_2141_filtered.vcf.gz	PASS	2013-05-08 03:33:55	/nfs/1000g-archive/vol1/ftp/data/NA18606/alignment/NA18606.mapped.ILLUMINA.bwa.CHB.low_coverage.20130415.bam		NA18606.mapped.ILLUMINA.bwa.CHB.low_coverage.20130415.bam
43015	HG03729.mapped.ILLUMINA.bwa.ITU.low_coverage.20130415.bam	HG03729	1	ALL	BAM	0.00349	0.00381	781365	9.5	0.50005	0.00011	0.50078	9e-05	9.465	1.022	ITU.wgs.coriell_phase3_samples.20121126.snps.affy_6.genotypes.vcf.gz	PASS	2013-05-10 11:24:42	/nfs/1000g-archive/vol1/ftp/data/HG03729/alignment/HG03729.mapped.ILLUMINA.bwa.ITU.low_coverage.20130415.bam		HG03729.mapped.ILLUMINA.bwa.ITU.low_coverage.20130415.bam
27427	HG03802.mapped.ILLUMINA.bwa.BEB.low_coverage.20130415.bam	HG03802	1	ALL	BAM	0.00349	0.00349	783628	10.48	0.50106	0.0002	0.50183	0.00021	10.527	0.9954	BEB.wgs.coriell_phase3_samples.20121126.snps.affy_6.genotypes.vcf.gz	PASS	2013-05-05 10:00:29	/nfs/1000g-archive/vol1/ftp/data/HG03802/alignment/HG03802.mapped.ILLUMINA.bwa.BEB.low_coverage.20130415.bam		HG03802.mapped.ILLUMINA.bwa.BEB.low_coverage.20130415.bam
10877	HG01945.mapped.ILLUMINA.bwa.PEL.low_coverage.20120522.bam	HG01945	1	ALL	BAM	0.00349	0	779795	6.67	0.50186	0.00042	0	0	0	0	PEL.wgs.coriell_phase3_samples.20121126.snps.affy_6.genotypes.vcf.gz	PASS	2013-05-16 12:41:50	/nfs/1000g-archive/vol1/ftp/data/HG01945/alignment/HG01945.mapped.ILLUMINA.bwa.PEL.low_coverage.20120522.bam		HG01945.mapped.ILLUMINA.bwa.PEL.low_coverage.20120522.bam
11302	NA19024.mapped.ILLUMINA.bwa.LWK.low_coverage.20121211.bam	NA19024	1	ALL	BAM	0.00349	0	1570264	9.75	0.50121	0.00017	0	0	0	0	LWK.omni_wg_2141_filtered.vcf.gz	PASS	2013-05-17 00:28:02	/nfs/1000g-archive/vol1/ftp/data/NA19024/alignment/NA19024.mapped.ILLUMINA.bwa.LWK.low_coverage.20121211.bam		NA19024.mapped.ILLUMINA.bwa.LWK.low_coverage.20121211.bam
57144	HG03120.mapped.ILLUMINA.bwa.ESN.low_coverage.20130415.bam	HG03120	1	ALL	BAM	0.00348	0.00387	835395	9.12	0.50104	0.00016	0.50199	0.00016	9.09	1.0234	ESN.wgs.coriell_phase3_samples.20121126.snps.affy_6.genotypes.vcf.gz	PASS	2013-05-14 02:16:06	/nfs/1000g-archive/vol1/ftp/data/HG03120/alignment/HG03120.mapped.ILLUMINA.bwa.ESN.low_coverage.20130415.bam		HG03120.mapped.ILLUMINA.bwa.ESN.low_coverage.20130415.bam
49312	NA20806.mapped.ILLUMINA.bwa.TSI.low_coverage.20130415.bam	NA20806	1	ALL	BAM	0.00348	0.00382	1402149	7.14	0.50137	0.00042	0.50233	0.00028	7.149	0.9987	TSI.omni_wg_2141_filtered.vcf.gz	PASS	2013-05-10 20:47:31	/nfs/1000g-archive/vol1/ftp/data/NA20806/alignment/NA20806.mapped.ILLUMINA.bwa.TSI.low_coverage.20130415.bam		NA20806.mapped.ILLUMINA.bwa.TSI.low_coverage.20130415.bam
25725	HG04188.mapped.ILLUMINA.bwa.BEB.low_coverage.20130415.bam	HG04188	1	ALL	BAM	0.00348	0.00372	783628	8.2	0.50018	1e-05	0.50073	8e-05	8.17	1.023	BEB.wgs.coriell_phase3_samples.20121126.snps.affy_6.genotypes.vcf.gz	PASS	2013-05-05 06:20:53	/nfs/1000g-archive/vol1/ftp/data/HG04188/alignment/HG04188.mapped.ILLUMINA.bwa.BEB.low_coverage.20130415.bam		HG04188.mapped.ILLUMINA.bwa.BEB.low_coverage.20130415.bam
44004	HG03731.mapped.ILLUMINA.bwa.ITU.low_coverage.20130415.bam	HG03731	1	ALL	BAM	0.00348	0.00343	781365	9.94	0.50072	0.00016	0.50132	0.00023	9.959	0.9967	ITU.wgs.coriell_phase3_samples.20121126.snps.affy_6.genotypes.vcf.gz	PASS	2013-05-10 11:52:51	/nfs/1000g-archive/vol1/ftp/data/HG03731/alignment/HG03731.mapped.ILLUMINA.bwa.ITU.low_coverage.20130415.bam		HG03731.mapped.ILLUMINA.bwa.ITU.low_coverage.20130415.bam
12947	HG02789.mapped.ILLUMINA.bwa.PJL.low_coverage.20121211.bam	HG02789	1	ALL	BAM	0.00348	0	1753219	9.34	0.50188	0.00018	0	0	0	0	ALL.omni_wg_2141_filtered.vcf.gz	PASS	2013-05-16 17:04:59	/nfs/1000g-archive/vol1/ftp/data/HG02789/alignment/HG02789.mapped.ILLUMINA.bwa.PJL.low_coverage.20121211.bam		HG02789.mapped.ILLUMINA.bwa.PJL.low_coverage.20121211.bam
12863	HG03472.mapped.ILLUMINA.bwa.MSL.low_coverage.20121211.bam	HG03472	1	ALL	BAM	0.00348	0	1753219	7.25	0.49815	0.00044	0	0	0	0	ALL.omni_wg_2141_filtered.vcf.gz	PASS	2013-05-17 16:58:36	/nfs/1000g-archive/vol1/ftp/data/HG03472/alignment/HG03472.mapped.ILLUMINA.bwa.MSL.low_coverage.20121211.bam		HG03472.mapped.ILLUMINA.bwa.MSL.low_coverage.20121211.bam
58292	HG03115.mapped.ILLUMINA.bwa.ESN.low_coverage.20130415.bam	HG03115	1	ALL	BAM	0.00347	0.00374	835395	9.66	0.50187	0.00034	0.5018	0.00023	9.643	1.0219	ESN.wgs.coriell_phase3_samples.20121126.snps.affy_6.genotypes.vcf.gz	PASS	2013-05-14 02:52:56	/nfs/1000g-archive/vol1/ftp/data/HG03115/alignment/HG03115.mapped.ILLUMINA.bwa.ESN.low_coverage.20130415.bam		HG03115.mapped.ILLUMINA.bwa.ESN.low_coverage.20130415.bam
42209	HG00733.mapped.ILLUMINA.bwa.PUR.low_coverage.20130415.bam	HG00733	0	ALL	BAM	0.00347	0	854341	18.15	0.50193	0.00015	0	0	0	0	PUR.wgs.coriell_phase3_samples.20121126.snps.affy_6.genotypes.vcf.gz	PASS	2013-05-10 10:51:05	/nfs/1000g-archive/vol1/ftp/data/HG00733/alignment/HG00733.mapped.ILLUMINA.bwa.PUR.low_coverage.20130415.bam		HG00733.mapped.ILLUMINA.bwa.PUR.low_coverage.20130415.bam
13084	HG02769.mapped.ILLUMINA.bwa.GWD.low_coverage.20121211.bam	HG02769	1	ALL	BAM	0.00346	0.00385	840560	7.77	0.50174	0.00015	0.5025	0.00014	7.792	0.9979	GWD.wgs.coriell_phase3_samples.20121126.snps.affy_6.genotypes.vcf.gz	PASS	2013-05-16 15:28:29	/nfs/1000g-archive/vol1/ftp/data/HG02769/alignment/HG02769.mapped.ILLUMINA.bwa.GWD.low_coverage.20121211.bam		HG02769.mapped.ILLUMINA.bwa.GWD.low_coverage.20121211.bam
12570	HG00409.mapped.ILLUMINA.bwa.CHS.low_coverage.20121211.bam	HG00409	1	ALL	BAM	0.00346	0.00365	662328	8.95	0.50065	0.00048	0.50131	0.00048	8.928	1.0218	CHS.wgs.coriell_phase3_samples.20121126.snps.affy_6.genotypes.vcf.gz	PASS	2013-05-16 15:20:42	/nfs/1000g-archive/vol1/ftp/data/HG00409/alignment/HG00409.mapped.ILLUMINA.bwa.CHS.low_coverage.20121211.bam		HG00409.mapped.ILLUMINA.bwa.CHS.low_coverage.20121211.bam
57018	HG03133.mapped.ILLUMINA.bwa.ESN.low_coverage.20130415.bam	HG03133	1	ALL	BAM	0.00346	0.00359	835395	10.32	0.50166	0.00013	0.50214	0.00014	10.301	1.0211	ESN.wgs.coriell_phase3_samples.20121126.snps.affy_6.genotypes.vcf.gz	PASS	2013-05-14 02:04:43	/nfs/1000g-archive/vol1/ftp/data/HG03133/alignment/HG03133.mapped.ILLUMINA.bwa.ESN.low_coverage.20130415.bam		HG03133.mapped.ILLUMINA.bwa.ESN.low_coverage.20130415.bam
12691	NA19019.mapped.ILLUMINA.bwa.LWK.low_coverage.20121211.bam	NA19019	1	ALL	BAM	0.00346	0	887456	9.09	0.50132	0.00016	0	0	0	0	ALL.wgs.coriell_phase3_samples.20121126.snps.affy_6.genotypes.vcf.gz	PASS	2013-05-16 11:54:27	/nfs/1000g-archive/vol1/ftp/data/NA19019/alignment/NA19019.mapped.ILLUMINA.bwa.LWK.low_coverage.20121211.bam		NA19019.mapped.ILLUMINA.bwa.LWK.low_coverage.20121211.bam
9963	NA20587.mapped.ILLUMINA.bwa.TSI.low_coverage.20121211.bam	NA20587	1	ALL	BAM	0.00345	0	1402149	10.54	0.50179	0.00046	0	0	0	0	TSI.omni_wg_2141_filtered.vcf.gz	PASS	2013-05-17 13:57:48	/nfs/1000g-archive/vol1/ftp/data/NA20587/alignment/NA20587.mapped.ILLUMINA.bwa.TSI.low_coverage.20121211.bam		NA20587.mapped.ILLUMINA.bwa.TSI.low_coverage.20121211.bam
10141	NA19312.mapped.ILLUMINA.bwa.LWK.low_coverage.20120522.bam	NA19312	1	ALL	BAM	0.00344	0.00419	1570264	4.79	0.50418	0.00043	0.503	0.00056	4.795	1.0008	LWK.omni_wg_2141_filtered.vcf.gz	PASS	2013-05-17 09:33:06	/nfs/1000g-archive/vol1/ftp/data/NA19312/alignment/NA19312.mapped.ILLUMINA.bwa.LWK.low_coverage.20120522.bam		NA19312.mapped.ILLUMINA.bwa.LWK.low_coverage.20120522.bam
8086	HG02325.mapped.ILLUMINA.bwa.ACB.low_coverage.20120522.bam	HG02325	1	ALL	BAM	0.00344	0.00372	1597764	6.48	0.50084	0.00038	0.5031	0.00061	6.486	1.0017	ACB.omni_wg_2141_filtered.vcf.gz	PASS	2013-05-17 09:43:36	/nfs/1000g-archive/vol1/ftp/data/HG02325/alignment/HG02325.mapped.ILLUMINA.bwa.ACB.low_coverage.20120522.bam		HG02325.mapped.ILLUMINA.bwa.ACB.low_coverage.20120522.bam
8781	NA12156.mapped.ILLUMINA.bwa.CEU.low_coverage.20120522.bam	NA12156	1	ALL	BAM	0.00344	0.00358	1400785	6.8	0.50096	0.00028	0.50127	0.00029	6.81	1	CEU.omni_wg_2141_filtered.vcf.gz	PASS	2013-05-17 10:38:48	/nfs/1000g-archive/vol1/ftp/data/NA12156/alignment/NA12156.mapped.ILLUMINA.bwa.CEU.low_coverage.20120522.bam		NA12156.mapped.ILLUMINA.bwa.CEU.low_coverage.20120522.bam
58522	HG03028.mapped.ILLUMINA.bwa.GWD.low_coverage.20130415.bam	HG03028	1	ALL	BAM	0.00344	0.00353	840560	10.9	0.50119	0.00014	0.50085	0.00015	10.926	0.9968	GWD.wgs.coriell_phase3_samples.20121126.snps.affy_6.genotypes.vcf.gz	PASS	2013-05-14 02:58:13	/nfs/1000g-archive/vol1/ftp/data/HG03028/alignment/HG03028.mapped.ILLUMINA.bwa.GWD.low_coverage.20130415.bam		HG03028.mapped.ILLUMINA.bwa.GWD.low_coverage.20130415.bam
12365	HG03045.mapped.ILLUMINA.bwa.GWD.low_coverage.20121211.bam	HG03045	1	ALL	BAM	0.00344	0	1753219	7.72	0.49908	0.00014	0	0	0	0	ALL.omni_wg_2141_filtered.vcf.gz	PASS	2013-05-16 21:33:51	/nfs/1000g-archive/vol1/ftp/data/HG03045/alignment/HG03045.mapped.ILLUMINA.bwa.GWD.low_coverage.20121211.bam		HG03045.mapped.ILLUMINA.bwa.GWD.low_coverage.20121211.bam
23103	HG03741.mapped.ILLUMINA.bwa.STU.low_coverage.20130415.bam	HG03741	1	ALL	BAM	0.00344	0	1753219	12.35	0.50124	0.00015	0	0	0	0	ALL.omni_wg_2141_filtered.vcf.gz	PASS	2013-05-03 12:53:17	/nfs/1000g-archive/vol1/ftp/data/HG03741/alignment/HG03741.mapped.ILLUMINA.bwa.STU.low_coverage.20130415.bam		HG03741.mapped.ILLUMINA.bwa.STU.low_coverage.20130415.bam
40582	NA20805.mapped.ILLUMINA.bwa.TSI.low_coverage.20130415.bam	NA20805	1	ALL	BAM	0.00344	0	887456	7.37	0.5024	0.00012	0	0	0	0	ALL.wgs.coriell_phase3_samples.20121126.snps.affy_6.genotypes.vcf.gz	PASS	2013-05-10 09:04:27	/nfs/1000g-archive/vol1/ftp/data/NA20805/alignment/NA20805.mapped.ILLUMINA.bwa.TSI.low_coverage.20130415.bam		NA20805.mapped.ILLUMINA.bwa.TSI.low_coverage.20130415.bam
12762	HG03072.mapped.ILLUMINA.bwa.MSL.low_coverage.20121211.bam	HG03072	1	ALL	BAM	0.00343	0.00375	838168	7.62	0.50123	9e-05	0.50173	8e-05	7.595	1.0235	MSL.wgs.coriell_phase3_samples.20121126.snps.affy_6.genotypes.vcf.gz	PASS	2013-05-16 10:44:39	/nfs/1000g-archive/vol1/ftp/data/HG03072/alignment/HG03072.mapped.ILLUMINA.bwa.MSL.low_coverage.20121211.bam		HG03072.mapped.ILLUMINA.bwa.MSL.low_coverage.20121211.bam
59673	NA18614.mapped.ILLUMINA.bwa.CHB.low_coverage.20130415.bam	NA18614	1	ALL	BAM	0.00343	0.00325	1252142	7.65	0.501	0.00038	0.50077	0.00051	7.661	0.9983	CHB.omni_wg_2141_filtered.vcf.gz	PASS	2013-05-14 03:50:14	/nfs/1000g-archive/vol1/ftp/data/NA18614/alignment/NA18614.mapped.ILLUMINA.bwa.CHB.low_coverage.20130415.bam		NA18614.mapped.ILLUMINA.bwa.CHB.low_coverage.20130415.bam
12148	HG00599.mapped.ILLUMINA.bwa.CHS.low_coverage.20121211.bam	HG00599	1	ALL	BAM	0.00343	0	1243376	9.12	0.50124	0.00069	0	0	0	0	CHS.omni_wg_2141_filtered.vcf.gz	PASS	2013-05-17 05:07:36	/nfs/1000g-archive/vol1/ftp/data/HG00599/alignment/HG00599.mapped.ILLUMINA.bwa.CHS.low_coverage.20121211.bam		HG00599.mapped.ILLUMINA.bwa.CHS.low_coverage.20121211.bam
39715	HG01095.mapped.ILLUMINA.bwa.PUR.low_coverage.20130415.bam	HG01095	1	ALL	BAM	0.00343	0	854341	10.3	0.50279	0.00028	0	0	0	0	PUR.wgs.coriell_phase3_samples.20121126.snps.affy_6.genotypes.vcf.gz	PASS	2013-05-10 07:34:05	/nfs/1000g-archive/vol1/ftp/data/HG01095/alignment/HG01095.mapped.ILLUMINA.bwa.PUR.low_coverage.20130415.bam		HG01095.mapped.ILLUMINA.bwa.PUR.low_coverage.20130415.bam
20828	HG03432.mapped.ILLUMINA.bwa.MSL.low_coverage.20130415.bam	HG03432	1	ALL	BAM	0.00342	0.00566	838168	4.16	0.50203	0.00055	0.50167	0.00023	4.142	1.0242	MSL.wgs.coriell_phase3_samples.20121126.snps.affy_6.genotypes.vcf.gz	PASS	2013-05-03 05:33:51	/nfs/1000g-archive/vol1/ftp/data/HG03432/alignment/HG03432.mapped.ILLUMINA.bwa.MSL.low_coverage.20130415.bam		HG03432.mapped.ILLUMINA.bwa.MSL.low_coverage.20130415.bam
43172	HG03784.mapped.ILLUMINA.bwa.ITU.low_coverage.20130415.bam	HG03784	1	ALL	BAM	0.00342	0.00376	781365	8.75	0.50076	0.0002	0.50066	0.00018	8.767	0.9982	ITU.wgs.coriell_phase3_samples.20121126.snps.affy_6.genotypes.vcf.gz	PASS	2013-05-10 11:31:43	/nfs/1000g-archive/vol1/ftp/data/HG03784/alignment/HG03784.mapped.ILLUMINA.bwa.ITU.low_coverage.20130415.bam		HG03784.mapped.ILLUMINA.bwa.ITU.low_coverage.20130415.bam
12251	HG02600.mapped.ILLUMINA.bwa.PJL.low_coverage.20121211.bam	HG02600	1	ALL	BAM	0.00342	0.00362	781539	9.15	0.50087	0.0003	0.50116	0.0003	9.127	1.0212	PJL.wgs.coriell_phase3_samples.20121126.snps.affy_6.genotypes.vcf.gz	PASS	2013-05-17 00:33:59	/nfs/1000g-archive/vol1/ftp/data/HG02600/alignment/HG02600.mapped.ILLUMINA.bwa.PJL.low_coverage.20121211.bam		HG02600.mapped.ILLUMINA.bwa.PJL.low_coverage.20121211.bam
25775	HG03922.mapped.ILLUMINA.bwa.BEB.low_coverage.20130415.bam	HG03922	1	ALL	BAM	0.00342	0.00358	783628	6.33	0.50033	8e-05	0.50509	8e-05	6.344	0.9986	BEB.wgs.coriell_phase3_samples.20121126.snps.affy_6.genotypes.vcf.gz	PASS	2013-05-05 06:28:52	/nfs/1000g-archive/vol1/ftp/data/HG03922/alignment/HG03922.mapped.ILLUMINA.bwa.BEB.low_coverage.20130415.bam		HG03922.mapped.ILLUMINA.bwa.BEB.low_coverage.20130415.bam
16203	HG02176.mapped.ILLUMINA.bwa.CDX.low_coverage.20130415.bam	HG02176	0	ALL	BAM	0.00342	0.00105	665690	5.17	0.50148	0.00026	0.50148	0.00028	5.176	0.9987	CDX.wgs.coriell_phase3_samples.20121126.snps.affy_6.genotypes.vcf.gz	PASS	2013-04-30 18:44:57	/nfs/1000g-archive/vol1/ftp/data/HG02176/alignment/HG02176.mapped.ILLUMINA.bwa.CDX.low_coverage.20130415.bam		HG02176.mapped.ILLUMINA.bwa.CDX.low_coverage.20130415.bam
42672	HG03679.mapped.ILLUMINA.bwa.STU.low_coverage.20130415.bam	HG03679	1	ALL	BAM	0.00341	0.00391	779732	10.57	0.50141	0.00023	0.50134	0.00015	10.539	1.0212	STU.wgs.coriell_phase3_samples.20121126.snps.affy_6.genotypes.vcf.gz	PASS	2013-05-10 11:09:00	/nfs/1000g-archive/vol1/ftp/data/HG03679/alignment/HG03679.mapped.ILLUMINA.bwa.STU.low_coverage.20130415.bam		HG03679.mapped.ILLUMINA.bwa.STU.low_coverage.20130415.bam
9204	NA19347.mapped.ILLUMINA.bwa.LWK.low_coverage.20120522.bam	NA19347	1	ALL	BAM	0.00341	0.00371	1570264	6.96	0.50341	0.00033	0.5036	0.00043	6.998	0.9929	LWK.omni_wg_2141_filtered.vcf.gz	PASS	2013-05-17 01:50:28	/nfs/1000g-archive/vol1/ftp/data/NA19347/alignment/NA19347.mapped.ILLUMINA.bwa.LWK.low_coverage.20120522.bam		NA19347.mapped.ILLUMINA.bwa.LWK.low_coverage.20120522.bam
12626	HG02610.mapped.ILLUMINA.bwa.GWD.low_coverage.20121211.bam	HG02610	1	ALL	BAM	0.00341	0.0037	840560	9.18	0.50097	0.00012	0.50121	0.00014	9.163	1.022	GWD.wgs.coriell_phase3_samples.20121126.snps.affy_6.genotypes.vcf.gz	PASS	2013-05-16 11:07:19	/nfs/1000g-archive/vol1/ftp/data/HG02610/alignment/HG02610.mapped.ILLUMINA.bwa.GWD.low_coverage.20121211.bam		HG02610.mapped.ILLUMINA.bwa.GWD.low_coverage.20121211.bam
56564	HG02562.mapped.ILLUMINA.bwa.GWD.low_coverage.20130415.bam	HG02562	1	ALL	BAM	0.00341	0.00354	840560	10.21	0.50154	0.00016	0.5018	7e-05	10.237	0.997	GWD.wgs.coriell_phase3_samples.20121126.snps.affy_6.genotypes.vcf.gz	PASS	2013-05-14 01:32:23	/nfs/1000g-archive/vol1/ftp/data/HG02562/alignment/HG02562.mapped.ILLUMINA.bwa.GWD.low_coverage.20130415.bam		HG02562.mapped.ILLUMINA.bwa.GWD.low_coverage.20130415.bam
12141	HG03135.mapped.ILLUMINA.bwa.ESN.low_coverage.20121211.bam	HG03135	1	ALL	BAM	0.00341	0.00325	835395	8.64	0.49956	0.0003	0.50015	0.00031	8.659	0.9971	ESN.wgs.coriell_phase3_samples.20121126.snps.affy_6.genotypes.vcf.gz	PASS	2013-05-17 01:17:19	/nfs/1000g-archive/vol1/ftp/data/HG03135/alignment/HG03135.mapped.ILLUMINA.bwa.ESN.low_coverage.20121211.bam		HG03135.mapped.ILLUMINA.bwa.ESN.low_coverage.20121211.bam
14856	HG01477.mapped.ILLUMINA.bwa.CLM.low_coverage.20130415.bam	HG01477	0	ALL	BAM	0.00341	0.00221	832763	4.08	0.50253	0.00041	0.50238	0.00022	4.085	0.9992	CLM.wgs.coriell_phase3_samples.20121126.snps.affy_6.genotypes.vcf.gz	PASS	2013-04-30 17:13:14	/nfs/1000g-archive/vol1/ftp/data/HG01477/alignment/HG01477.mapped.ILLUMINA.bwa.CLM.low_coverage.20130415.bam		HG01477.mapped.ILLUMINA.bwa.CLM.low_coverage.20130415.bam
12867	HG03826.mapped.ILLUMINA.bwa.BEB.low_coverage.20121211.bam	HG03826	1	ALL	BAM	0.00341	0	1753219	6.58	0.50264	0.00017	0	0	0	0	ALL.omni_wg_2141_filtered.vcf.gz	PASS	2013-05-17 01:51:52	/nfs/1000g-archive/vol1/ftp/data/HG03826/alignment/HG03826.mapped.ILLUMINA.bwa.BEB.low_coverage.20121211.bam		HG03826.mapped.ILLUMINA.bwa.BEB.low_coverage.20121211.bam
12357	NA20861.mapped.ILLUMINA.bwa.GIH.low_coverage.20120522.bam	NA20861	1	ALL	BAM	0.00341	0	887456	4.7	0.5054	0.0008	0	0	0	0	ALL.wgs.coriell_phase3_samples.20121126.snps.affy_6.genotypes.vcf.gz	PASS	2013-05-16 17:37:00	/nfs/1000g-archive/vol1/ftp/data/NA20861/alignment/NA20861.mapped.ILLUMINA.bwa.GIH.low_coverage.20120522.bam		NA20861.mapped.ILLUMINA.bwa.GIH.low_coverage.20120522.bam
16154	HG02511.mapped.ILLUMINA.bwa.ACB.low_coverage.20130415.bam	HG02511	1	ALL	BAM	0.0034	0.00366	1597764	5.16	0.50055	5e-05	0.50181	0.0003	5.15	1.005	ACB.omni_wg_2141_filtered.vcf.gz	PASS	2013-04-30 18:41:26	/nfs/1000g-archive/vol1/ftp/data/HG02511/alignment/HG02511.mapped.ILLUMINA.bwa.ACB.low_coverage.20130415.bam		HG02511.mapped.ILLUMINA.bwa.ACB.low_coverage.20130415.bam
9011	NA11840.mapped.ILLUMINA.bwa.CEU.low_coverage.20120522.bam	NA11840	1	ALL	BAM	0.0034	0.00354	1400785	8.92	0.5022	0.00029	0.50222	0.00031	8.938	0.9984	CEU.omni_wg_2141_filtered.vcf.gz	PASS	2013-05-17 02:26:51	/nfs/1000g-archive/vol1/ftp/data/NA11840/alignment/NA11840.mapped.ILLUMINA.bwa.CEU.low_coverage.20120522.bam		NA11840.mapped.ILLUMINA.bwa.CEU.low_coverage.20120522.bam
16406	HG02260.mapped.ILLUMINA.bwa.PEL.low_coverage.20130415.bam	HG02260	1	ALL	BAM	0.0034	0	779795	9.66	0.50087	8e-05	0	0	0	0	PEL.wgs.coriell_phase3_samples.20121126.snps.affy_6.genotypes.vcf.gz	PASS	2013-04-30 18:59:49	/nfs/1000g-archive/vol1/ftp/data/HG02260/alignment/HG02260.mapped.ILLUMINA.bwa.PEL.low_coverage.20130415.bam		HG02260.mapped.ILLUMINA.bwa.PEL.low_coverage.20130415.bam
48418	NA19454.mapped.ILLUMINA.bwa.LWK.low_coverage.20130415.bam	NA19454	1	ALL	BAM	0.0034	0	1570264	9.53	0.50289	0.00053	0	0	0	0	LWK.omni_wg_2141_filtered.vcf.gz	PASS	2013-05-10 19:54:53	/nfs/1000g-archive/vol1/ftp/data/NA19454/alignment/NA19454.mapped.ILLUMINA.bwa.LWK.low_coverage.20130415.bam		NA19454.mapped.ILLUMINA.bwa.LWK.low_coverage.20130415.bam
57441	HG02715.mapped.ILLUMINA.bwa.GWD.low_coverage.20130415.bam	HG02715	1	ALL	BAM	0.00339	0.00349	840560	8.83	0.50009	0.00011	0.50024	0.00025	8.802	1.0216	GWD.wgs.coriell_phase3_samples.20121126.snps.affy_6.genotypes.vcf.gz	PASS	2013-05-14 02:26:08	/nfs/1000g-archive/vol1/ftp/data/HG02715/alignment/HG02715.mapped.ILLUMINA.bwa.GWD.low_coverage.20130415.bam		HG02715.mapped.ILLUMINA.bwa.GWD.low_coverage.20130415.bam
42776	HG03643.mapped.ILLUMINA.bwa.STU.low_coverage.20130415.bam	HG03643	1	ALL	BAM	0.00339	0.00339	779732	10.8	0.50128	0.00018	0.50098	0.00014	10.83	0.9961	STU.wgs.coriell_phase3_samples.20121126.snps.affy_6.genotypes.vcf.gz	PASS	2013-05-10 11:15:19	/nfs/1000g-archive/vol1/ftp/data/HG03643/alignment/HG03643.mapped.ILLUMINA.bwa.STU.low_coverage.20130415.bam		HG03643.mapped.ILLUMINA.bwa.STU.low_coverage.20130415.bam
11443	HG02721.mapped.ILLUMINA.bwa.GWD.low_coverage.20121211.bam	HG02721	1	ALL	BAM	0.00339	0	1753219	10.28	0.5004	0.00013	0	0	0	0	ALL.omni_wg_2141_filtered.vcf.gz	PASS	2013-05-16 23:48:17	/nfs/1000g-archive/vol1/ftp/data/HG02721/alignment/HG02721.mapped.ILLUMINA.bwa.GWD.low_coverage.20121211.bam		HG02721.mapped.ILLUMINA.bwa.GWD.low_coverage.20121211.bam
22732	HG03757.mapped.ILLUMINA.bwa.STU.low_coverage.20130415.bam	HG03757	1	ALL	BAM	0.00339	0	1753219	10.8	0.50219	0.00038	0	0	0	0	ALL.omni_wg_2141_filtered.vcf.gz	PASS	2013-05-03 11:19:35	/nfs/1000g-archive/vol1/ftp/data/HG03757/alignment/HG03757.mapped.ILLUMINA.bwa.STU.low_coverage.20130415.bam		HG03757.mapped.ILLUMINA.bwa.STU.low_coverage.20130415.bam
7822	HG01669.mapped.ILLUMINA.bwa.IBS.low_coverage.20120522.bam	HG01669	1	ALL	BAM	0.00338	0.0042	1400201	4.32	0.50406	0.00095	0.50412	0.00081	4.321	1.0063	IBS.omni_wg_2141_filtered.vcf.gz	PASS	2013-05-17 03:14:08	/nfs/1000g-archive/vol1/ftp/data/HG01669/alignment/HG01669.mapped.ILLUMINA.bwa.IBS.low_coverage.20120522.bam		HG01669.mapped.ILLUMINA.bwa.IBS.low_coverage.20120522.bam
21973	HG03681.mapped.ILLUMINA.bwa.STU.low_coverage.20130415.bam	HG03681	1	ALL	BAM	0.00338	0.00364	779732	9.84	0.50039	8e-05	0.50106	0.00013	9.809	1.0211	STU.wgs.coriell_phase3_samples.20121126.snps.affy_6.genotypes.vcf.gz	PASS	2013-05-03 08:49:45	/nfs/1000g-archive/vol1/ftp/data/HG03681/alignment/HG03681.mapped.ILLUMINA.bwa.STU.low_coverage.20130415.bam		HG03681.mapped.ILLUMINA.bwa.STU.low_coverage.20130415.bam
58242	HG02798.mapped.ILLUMINA.bwa.GWD.low_coverage.20130415.bam	HG02798	1	ALL	BAM	0.00338	0.00362	840560	9.68	0.5007	0.00012	0.50112	0.00016	9.664	1.0221	GWD.wgs.coriell_phase3_samples.20121126.snps.affy_6.genotypes.vcf.gz	PASS	2013-05-14 02:51:28	/nfs/1000g-archive/vol1/ftp/data/HG02798/alignment/HG02798.mapped.ILLUMINA.bwa.GWD.low_coverage.20130415.bam		HG02798.mapped.ILLUMINA.bwa.GWD.low_coverage.20130415.bam
16309	HG02442.mapped.ILLUMINA.bwa.ACB.low_coverage.20130415.bam	HG02442	1	ALL	BAM	0.00338	0.00329	1597764	3.79	0.50143	0.00022	0.50273	0.00066	3.797	0.9989	ACB.omni_wg_2141_filtered.vcf.gz	PASS	2013-04-30 18:54:34	/nfs/1000g-archive/vol1/ftp/data/HG02442/alignment/HG02442.mapped.ILLUMINA.bwa.ACB.low_coverage.20130415.bam		HG02442.mapped.ILLUMINA.bwa.ACB.low_coverage.20130415.bam
13030	HG02703.mapped.ILLUMINA.bwa.GWD.low_coverage.20121211.bam	HG02703	1	ALL	BAM	0.00337	0.00356	840560	10.84	0.50108	0.00033	0.50081	0.00033	10.853	0.9989	GWD.wgs.coriell_phase3_samples.20121126.snps.affy_6.genotypes.vcf.gz	PASS	2013-05-16 23:33:34	/nfs/1000g-archive/vol1/ftp/data/HG02703/alignment/HG02703.mapped.ILLUMINA.bwa.GWD.low_coverage.20121211.bam		HG02703.mapped.ILLUMINA.bwa.GWD.low_coverage.20121211.bam
10719	HG01191.mapped.ILLUMINA.bwa.PUR.low_coverage.20120522.bam	HG01191	1	ALL	BAM	0.00337	0	854341	5.89	0.50208	0.00026	0	0	0	0	PUR.wgs.coriell_phase3_samples.20121126.snps.affy_6.genotypes.vcf.gz	PASS	2013-05-16 17:00:27	/nfs/1000g-archive/vol1/ftp/data/HG01191/alignment/HG01191.mapped.ILLUMINA.bwa.PUR.low_coverage.20120522.bam		HG01191.mapped.ILLUMINA.bwa.PUR.low_coverage.20120522.bam
61178	HG02585.mapped.ILLUMINA.bwa.GWD.low_coverage.20130415.bam	HG02585	1	ALL	BAM	0.00337	0	1753219	10.25	0.50015	0.00013	0	0	0	0	ALL.omni_wg_2141_filtered.vcf.gz	PASS	2013-05-14 04:43:50	/nfs/1000g-archive/vol1/ftp/data/HG02585/alignment/HG02585.mapped.ILLUMINA.bwa.GWD.low_coverage.20130415.bam		HG02585.mapped.ILLUMINA.bwa.GWD.low_coverage.20130415.bam
20899	HG03298.mapped.ILLUMINA.bwa.ESN.low_coverage.20130415.bam	HG03298	1	ALL	BAM	0.00336	0.00369	835395	8.96	0.50013	8e-05	0.50097	4e-05	8.926	1.025	ESN.wgs.coriell_phase3_samples.20121126.snps.affy_6.genotypes.vcf.gz	PASS	2013-05-03 05:39:47	/nfs/1000g-archive/vol1/ftp/data/HG03298/alignment/HG03298.mapped.ILLUMINA.bwa.ESN.low_coverage.20130415.bam		HG03298.mapped.ILLUMINA.bwa.ESN.low_coverage.20130415.bam
12968	HG02589.mapped.ILLUMINA.bwa.GWD.low_coverage.20121211.bam	HG02589	1	ALL	BAM	0.00336	0.00341	840560	8.72	0.50167	9e-05	0.50163	0.00011	8.738	0.9974	GWD.wgs.coriell_phase3_samples.20121126.snps.affy_6.genotypes.vcf.gz	PASS	2013-05-16 10:50:32	/nfs/1000g-archive/vol1/ftp/data/HG02589/alignment/HG02589.mapped.ILLUMINA.bwa.GWD.low_coverage.20121211.bam		HG02589.mapped.ILLUMINA.bwa.GWD.low_coverage.20121211.bam
8269	NA19920.mapped.ILLUMINA.bwa.ASW.low_coverage.20120522.bam	NA19920	1	ALL	BAM	0.00336	0.0034	1675632	13.94	0.50187	0.00018	0.50282	0.00024	13.964	0.9988	ASW.omni_wg_2141_filtered.vcf.gz	PASS	2013-05-17 06:18:37	/nfs/1000g-archive/vol1/ftp/data/NA19920/alignment/NA19920.mapped.ILLUMINA.bwa.ASW.low_coverage.20120522.bam		NA19920.mapped.ILLUMINA.bwa.ASW.low_coverage.20120522.bam
12739	HG03076.mapped.ILLUMINA.bwa.MSL.low_coverage.20121211.bam	HG03076	0	ALL	BAM	0.00335	0.00397	838168	4	0.50088	0.00035	0.5011	0.00018	4.01	0.9963	MSL.wgs.coriell_phase3_samples.20121126.snps.affy_6.genotypes.vcf.gz	PASS	2013-05-16 12:34:50	/nfs/1000g-archive/vol1/ftp/data/HG03076/alignment/HG03076.mapped.ILLUMINA.bwa.MSL.low_coverage.20121211.bam		HG03076.mapped.ILLUMINA.bwa.MSL.low_coverage.20121211.bam
13153	HG03428.mapped.ILLUMINA.bwa.MSL.low_coverage.20121211.bam	HG03428	1	ALL	BAM	0.00335	0.00354	838168	7.69	0.50073	0.00011	0.50101	0.00013	7.704	0.9988	MSL.wgs.coriell_phase3_samples.20121126.snps.affy_6.genotypes.vcf.gz	PASS	2013-05-16 15:14:21	/nfs/1000g-archive/vol1/ftp/data/HG03428/alignment/HG03428.mapped.ILLUMINA.bwa.MSL.low_coverage.20121211.bam		HG03428.mapped.ILLUMINA.bwa.MSL.low_coverage.20121211.bam
42064	HG01048.mapped.ILLUMINA.bwa.PUR.low_coverage.20130415.bam	HG01048	1	ALL	BAM	0.00335	0.00343	1558284	8.14	0.50169	0.00044	0.50247	0.00051	8.172	0.9946	PUR.omni_wg_2141_filtered.vcf.gz	PASS	2013-05-10 10:42:36	/nfs/1000g-archive/vol1/ftp/data/HG01048/alignment/HG01048.mapped.ILLUMINA.bwa.PUR.low_coverage.20130415.bam		HG01048.mapped.ILLUMINA.bwa.PUR.low_coverage.20130415.bam
9348	HG02377.mapped.ILLUMINA.bwa.CDX.low_coverage.20120522.bam	HG02377	0	ALL	BAM	0.00335	0.0031	1235978	5.98	0.50179	0.00023	0.50173	0.00028	5.983	0.9994	CDX.omni_wg_2141_filtered.vcf.gz	PASS	2013-05-16 23:26:38	/nfs/1000g-archive/vol1/ftp/data/HG02377/alignment/HG02377.mapped.ILLUMINA.bwa.CDX.low_coverage.20120522.bam		HG02377.mapped.ILLUMINA.bwa.CDX.low_coverage.20120522.bam
42408	HG03714.mapped.ILLUMINA.bwa.ITU.low_coverage.20130415.bam	HG03714	1	ALL	BAM	0.00335	0.0031	781365	8.91	0.50136	0.00011	0.50076	0.00013	8.931	0.997	ITU.wgs.coriell_phase3_samples.20121126.snps.affy_6.genotypes.vcf.gz	PASS	2013-05-10 10:58:55	/nfs/1000g-archive/vol1/ftp/data/HG03714/alignment/HG03714.mapped.ILLUMINA.bwa.ITU.low_coverage.20130415.bam		HG03714.mapped.ILLUMINA.bwa.ITU.low_coverage.20130415.bam
10463	HG01500.mapped.ILLUMINA.bwa.IBS.low_coverage.20120522.bam	HG01500	1	ALL	BAM	0.00335	0.00247	1400201	3.96	0.50234	0.00063	0.50261	0.00054	3.964	1.0004	IBS.omni_wg_2141_filtered.vcf.gz	PASS	2013-05-16 11:55:59	/nfs/1000g-archive/vol1/ftp/data/HG01500/alignment/HG01500.mapped.ILLUMINA.bwa.IBS.low_coverage.20120522.bam		HG01500.mapped.ILLUMINA.bwa.IBS.low_coverage.20120522.bam
32440	NA18907.mapped.ILLUMINA.bwa.YRI.low_coverage.20130415.bam	NA18907	1	ALL	BAM	0.00335	0	887456	5.58	0.49806	0.00029	0	0	0	0	ALL.wgs.coriell_phase3_samples.20121126.snps.affy_6.genotypes.vcf.gz	PASS	2013-05-08 02:22:33	/nfs/1000g-archive/vol1/ftp/data/NA18907/alignment/NA18907.mapped.ILLUMINA.bwa.YRI.low_coverage.20130415.bam		NA18907.mapped.ILLUMINA.bwa.YRI.low_coverage.20130415.bam
48385	NA19323.mapped.ILLUMINA.bwa.LWK.low_coverage.20130415.bam	NA19323	1	ALL	BAM	0.00335	0	1570264	8.23	0.50349	0.00067	0	0	0	0	LWK.omni_wg_2141_filtered.vcf.gz	PASS	2013-05-10 19:54:13	/nfs/1000g-archive/vol1/ftp/data/NA19323/alignment/NA19323.mapped.ILLUMINA.bwa.LWK.low_coverage.20130415.bam		NA19323.mapped.ILLUMINA.bwa.LWK.low_coverage.20130415.bam
21920	HG03673.mapped.ILLUMINA.bwa.STU.low_coverage.20130415.bam	HG03673	1	ALL	BAM	0.00334	0.00359	779732	9.38	0.50081	0.00015	0.50044	0.0001	9.406	0.9975	STU.wgs.coriell_phase3_samples.20121126.snps.affy_6.genotypes.vcf.gz	PASS	2013-05-03 08:48:23	/nfs/1000g-archive/vol1/ftp/data/HG03673/alignment/HG03673.mapped.ILLUMINA.bwa.STU.low_coverage.20130415.bam		HG03673.mapped.ILLUMINA.bwa.STU.low_coverage.20130415.bam
43898	HG03874.mapped.ILLUMINA.bwa.ITU.low_coverage.20130415.bam	HG03874	1	ALL	BAM	0.00334	0.0034	781365	10.08	0.50016	0.00016	0.50007	0.00017	10.105	0.9978	ITU.wgs.coriell_phase3_samples.20121126.snps.affy_6.genotypes.vcf.gz	PASS	2013-05-10 11:50:16	/nfs/1000g-archive/vol1/ftp/data/HG03874/alignment/HG03874.mapped.ILLUMINA.bwa.ITU.low_coverage.20130415.bam		HG03874.mapped.ILLUMINA.bwa.ITU.low_coverage.20130415.bam
12202	HG03048.mapped.ILLUMINA.bwa.GWD.low_coverage.20121211.bam	HG03048	1	ALL	BAM	0.00334	0	1753219	9.98	0.50059	0.00031	0	0	0	0	ALL.omni_wg_2141_filtered.vcf.gz	PASS	2013-05-17 12:27:38	/nfs/1000g-archive/vol1/ftp/data/HG03048/alignment/HG03048.mapped.ILLUMINA.bwa.GWD.low_coverage.20121211.bam		HG03048.mapped.ILLUMINA.bwa.GWD.low_coverage.20121211.bam
12869	NA19017.mapped.ILLUMINA.bwa.LWK.low_coverage.20121211.bam	NA19017	1	ALL	BAM	0.00334	0	1570264	9.35	0.50171	0.00042	0	0	0	0	LWK.omni_wg_2141_filtered.vcf.gz	PASS	2013-05-17 15:39:33	/nfs/1000g-archive/vol1/ftp/data/NA19017/alignment/NA19017.mapped.ILLUMINA.bwa.LWK.low_coverage.20121211.bam		NA19017.mapped.ILLUMINA.bwa.LWK.low_coverage.20121211.bam
11193	NA21129.mapped.ILLUMINA.bwa.GIH.low_coverage.20121211.bam	NA21129	1	ALL	BAM	0.00334	0	1368816	8.6	0.50171	0.00042	0	0	0	0	GIH.omni_wg_2141_filtered.vcf.gz	PASS	2013-05-16 19:39:31	/nfs/1000g-archive/vol1/ftp/data/NA21129/alignment/NA21129.mapped.ILLUMINA.bwa.GIH.low_coverage.20121211.bam		NA21129.mapped.ILLUMINA.bwa.GIH.low_coverage.20121211.bam
59135	NA07347.mapped.ILLUMINA.bwa.CEU.low_coverage.20130415.bam	NA07347	1	ALL	BAM	0.00333	0.00349	1400785	11.62	0.50224	0.00044	0.50267	0.00054	11.646	0.9974	CEU.omni_wg_2141_filtered.vcf.gz	PASS	2013-05-14 03:17:35	/nfs/1000g-archive/vol1/ftp/data/NA07347/alignment/NA07347.mapped.ILLUMINA.bwa.CEU.low_coverage.20130415.bam		NA07347.mapped.ILLUMINA.bwa.CEU.low_coverage.20130415.bam
50482	NA20542.mapped.ILLUMINA.bwa.TSI.low_coverage.20130415.bam	NA20542	1	ALL	BAM	0.00333	0.00338	1402149	7.55	0.50164	0.00016	0.50227	0.00034	7.563	0.9977	TSI.omni_wg_2141_filtered.vcf.gz	PASS	2013-05-10 23:21:54	/nfs/1000g-archive/vol1/ftp/data/NA20542/alignment/NA20542.mapped.ILLUMINA.bwa.TSI.low_coverage.20130415.bam		NA20542.mapped.ILLUMINA.bwa.TSI.low_coverage.20130415.bam
43845	HG03772.mapped.ILLUMINA.bwa.ITU.low_coverage.20130415.bam	HG03772	1	ALL	BAM	0.00333	0.00335	781365	7.55	0.50019	0.00013	0.50006	0.00023	7.567	0.9974	ITU.wgs.coriell_phase3_samples.20121126.snps.affy_6.genotypes.vcf.gz	PASS	2013-05-10 11:47:49	/nfs/1000g-archive/vol1/ftp/data/HG03772/alignment/HG03772.mapped.ILLUMINA.bwa.ITU.low_coverage.20130415.bam		HG03772.mapped.ILLUMINA.bwa.ITU.low_coverage.20130415.bam
27901	HG03858.mapped.ILLUMINA.bwa.STU.low_coverage.20130415.bam	HG03858	1	ALL	BAM	0.00333	0	1753219	8.67	0.50147	0.00018	0	0	0	0	ALL.omni_wg_2141_filtered.vcf.gz	PASS	2013-05-05 11:02:56	/nfs/1000g-archive/vol1/ftp/data/HG03858/alignment/HG03858.mapped.ILLUMINA.bwa.STU.low_coverage.20130415.bam		HG03858.mapped.ILLUMINA.bwa.STU.low_coverage.20130415.bam
9419	NA19818.mapped.ILLUMINA.bwa.ASW.low_coverage.20120522.bam	NA19818	1	ALL	BAM	0.00332	0.00355	1675632	8.42	0.50081	0.00017	0.50193	0.00027	8.396	1.0105	ASW.omni_wg_2141_filtered.vcf.gz	PASS	2013-05-17 06:29:21	/nfs/1000g-archive/vol1/ftp/data/NA19818/alignment/NA19818.mapped.ILLUMINA.bwa.ASW.low_coverage.20120522.bam		NA19818.mapped.ILLUMINA.bwa.ASW.low_coverage.20120522.bam
12703	HG02462.mapped.ILLUMINA.bwa.GWD.low_coverage.20121211.bam	HG02462	1	ALL	BAM	0.00332	0.00337	840560	10.79	0.50142	9e-05	0.50137	0.00012	10.819	0.9968	GWD.wgs.coriell_phase3_samples.20121126.snps.affy_6.genotypes.vcf.gz	PASS	2013-05-16 19:07:37	/nfs/1000g-archive/vol1/ftp/data/HG02462/alignment/HG02462.mapped.ILLUMINA.bwa.GWD.low_coverage.20121211.bam		HG02462.mapped.ILLUMINA.bwa.GWD.low_coverage.20121211.bam
12600	HG02582.mapped.ILLUMINA.bwa.GWD.low_coverage.20121211.bam	HG02582	1	ALL	BAM	0.00332	0	1753219	9.77	0.50086	0.00015	0	0	0	0	ALL.omni_wg_2141_filtered.vcf.gz	PASS	2013-05-17 07:07:31	/nfs/1000g-archive/vol1/ftp/data/HG02582/alignment/HG02582.mapped.ILLUMINA.bwa.GWD.low_coverage.20121211.bam		HG02582.mapped.ILLUMINA.bwa.GWD.low_coverage.20121211.bam
59976	HG02465.mapped.ILLUMINA.bwa.GWD.low_coverage.20130415.bam	HG02465	1	ALL	BAM	0.00331	0.00355	840560	8.39	0.50093	0.00036	0.50074	0.00034	8.409	0.9976	GWD.wgs.coriell_phase3_samples.20121126.snps.affy_6.genotypes.vcf.gz	PASS	2013-05-14 04:00:21	/nfs/1000g-archive/vol1/ftp/data/HG02465/alignment/HG02465.mapped.ILLUMINA.bwa.GWD.low_coverage.20130415.bam		HG02465.mapped.ILLUMINA.bwa.GWD.low_coverage.20130415.bam
9342	HG01795.mapped.ILLUMINA.bwa.CDX.low_coverage.20120522.bam	HG01795	1	ALL	BAM	0.00331	0.00339	1235978	6.97	0.50176	0.00012	0.50164	0.00023	6.977	0.9999	CDX.omni_wg_2141_filtered.vcf.gz	PASS	2013-05-17 08:15:43	/nfs/1000g-archive/vol1/ftp/data/HG01795/alignment/HG01795.mapped.ILLUMINA.bwa.CDX.low_coverage.20120522.bam		HG01795.mapped.ILLUMINA.bwa.CDX.low_coverage.20120522.bam
11299	HG02603.mapped.ILLUMINA.bwa.PJL.low_coverage.20121211.bam	HG02603	1	ALL	BAM	0.00331	0	1753219	10.18	0.50241	0.00033	0	0	0	0	ALL.omni_wg_2141_filtered.vcf.gz	PASS	2013-05-17 10:38:04	/nfs/1000g-archive/vol1/ftp/data/HG02603/alignment/HG02603.mapped.ILLUMINA.bwa.PJL.low_coverage.20121211.bam		HG02603.mapped.ILLUMINA.bwa.PJL.low_coverage.20121211.bam
61502	HG03773.mapped.ILLUMINA.bwa.ITU.low_coverage.20130422.bam	HG03773	1	ALL	BAM	0.00331	0	1753219	10.72	0.50099	0.00016	0	0	0	0	ALL.omni_wg_2141_filtered.vcf.gz	PASS	2013-05-14 04:52:28	/nfs/1000g-archive/vol1/ftp/data/HG03773/alignment/HG03773.mapped.ILLUMINA.bwa.ITU.low_coverage.20130422.bam		HG03773.mapped.ILLUMINA.bwa.ITU.low_coverage.20130422.bam
11280	HG03928.mapped.ILLUMINA.bwa.BEB.low_coverage.20121211.bam	HG03928	1	ALL	BAM	0.00331	0	1753219	5.75	0.50189	0.00017	0	0	0	0	ALL.omni_wg_2141_filtered.vcf.gz	PASS	2013-05-17 01:26:01	/nfs/1000g-archive/vol1/ftp/data/HG03928/alignment/HG03928.mapped.ILLUMINA.bwa.BEB.low_coverage.20121211.bam		HG03928.mapped.ILLUMINA.bwa.BEB.low_coverage.20121211.bam
25836	HG04152.mapped.ILLUMINA.bwa.BEB.low_coverage.20130415.bam	HG04152	1	ALL	BAM	0.0033	0.00397	783628	8.32	0.49939	4e-05	0.49993	3e-05	8.29	1.0227	BEB.wgs.coriell_phase3_samples.20121126.snps.affy_6.genotypes.vcf.gz	PASS	2013-05-05 06:40:39	/nfs/1000g-archive/vol1/ftp/data/HG04152/alignment/HG04152.mapped.ILLUMINA.bwa.BEB.low_coverage.20130415.bam		HG04152.mapped.ILLUMINA.bwa.BEB.low_coverage.20130415.bam
43353	HG03862.mapped.ILLUMINA.bwa.ITU.low_coverage.20130415.bam	HG03862	1	ALL	BAM	0.0033	0.00371	781365	10.72	0.50059	0.00011	0.5015	0.00012	10.744	0.9965	ITU.wgs.coriell_phase3_samples.20121126.snps.affy_6.genotypes.vcf.gz	PASS	2013-05-10 11:34:55	/nfs/1000g-archive/vol1/ftp/data/HG03862/alignment/HG03862.mapped.ILLUMINA.bwa.ITU.low_coverage.20130415.bam		HG03862.mapped.ILLUMINA.bwa.ITU.low_coverage.20130415.bam
57706	HG02623.mapped.ILLUMINA.bwa.GWD.low_coverage.20130415.bam	HG02623	1	ALL	BAM	0.0033	0.00348	840560	13.01	0.50077	0.00017	0.50081	0.00017	12.973	1.023	GWD.wgs.coriell_phase3_samples.20121126.snps.affy_6.genotypes.vcf.gz	PASS	2013-05-14 02:40:22	/nfs/1000g-archive/vol1/ftp/data/HG02623/alignment/HG02623.mapped.ILLUMINA.bwa.GWD.low_coverage.20130415.bam		HG02623.mapped.ILLUMINA.bwa.GWD.low_coverage.20130415.bam
12456	HG03342.mapped.ILLUMINA.bwa.ESN.low_coverage.20121211.bam	HG03342	1	ALL	BAM	0.0033	0.00348	835395	8.79	0.50075	0.0001	0.50109	9e-05	8.805	0.9987	ESN.wgs.coriell_phase3_samples.20121126.snps.affy_6.genotypes.vcf.gz	PASS	2013-05-16 17:40:38	/nfs/1000g-archive/vol1/ftp/data/HG03342/alignment/HG03342.mapped.ILLUMINA.bwa.ESN.low_coverage.20121211.bam		HG03342.mapped.ILLUMINA.bwa.ESN.low_coverage.20121211.bam
34630	NA20529.mapped.ILLUMINA.bwa.TSI.low_coverage.20130415.bam	NA20529	1	ALL	BAM	0.0033	0.00348	1402149	5.89	0.50093	0.00036	0.50231	0.00037	5.895	1.0001	TSI.omni_wg_2141_filtered.vcf.gz	PASS	2013-05-08 05:44:44	/nfs/1000g-archive/vol1/ftp/data/NA20529/alignment/NA20529.mapped.ILLUMINA.bwa.TSI.low_coverage.20130415.bam		NA20529.mapped.ILLUMINA.bwa.TSI.low_coverage.20130415.bam
27594	HG03950.mapped.ILLUMINA.bwa.STU.low_coverage.20130415.bam	HG03950	1	ALL	BAM	0.0033	0.00344	779732	9.01	0.50127	0.00015	0.50086	0.00017	8.981	1.021	STU.wgs.coriell_phase3_samples.20121126.snps.affy_6.genotypes.vcf.gz	PASS	2013-05-05 10:50:27	/nfs/1000g-archive/vol1/ftp/data/HG03950/alignment/HG03950.mapped.ILLUMINA.bwa.STU.low_coverage.20130415.bam		HG03950.mapped.ILLUMINA.bwa.STU.low_coverage.20130415.bam
16710	HG01105.mapped.ILLUMINA.bwa.PUR.low_coverage.20130415.bam	HG01105	1	ALL	BAM	0.0033	0	854341	7.21	0.50069	0.00015	0	0	0	0	PUR.wgs.coriell_phase3_samples.20121126.snps.affy_6.genotypes.vcf.gz	PASS	2013-04-30 19:22:48	/nfs/1000g-archive/vol1/ftp/data/HG01105/alignment/HG01105.mapped.ILLUMINA.bwa.PUR.low_coverage.20130415.bam		HG01105.mapped.ILLUMINA.bwa.PUR.low_coverage.20130415.bam
56431	NA19439.mapped.ILLUMINA.bwa.LWK.low_coverage.20130415.bam	NA19439	1	ALL	BAM	0.0033	0	887456	7.71	0.50113	0.00019	0	0	0	0	ALL.wgs.coriell_phase3_samples.20121126.snps.affy_6.genotypes.vcf.gz	PASS	2013-05-14 01:19:48	/nfs/1000g-archive/vol1/ftp/data/NA19439/alignment/NA19439.mapped.ILLUMINA.bwa.LWK.low_coverage.20130415.bam		NA19439.mapped.ILLUMINA.bwa.LWK.low_coverage.20130415.bam
12085	HG02477.mapped.ILLUMINA.bwa.ACB.low_coverage.20121211.bam	HG02477	1	ALL	BAM	0.00329	0.0029	849391	7.3	0.50127	0.00014	0.5009	0.00013	7.317	0.9985	ACB.wgs.coriell_phase3_samples.20121126.snps.affy_6.genotypes.vcf.gz	PASS	2013-05-16 17:09:04	/nfs/1000g-archive/vol1/ftp/data/HG02477/alignment/HG02477.mapped.ILLUMINA.bwa.ACB.low_coverage.20121211.bam		HG02477.mapped.ILLUMINA.bwa.ACB.low_coverage.20121211.bam
47939	NA11920.mapped.ILLUMINA.bwa.CEU.low_coverage.20130415.bam	NA11920	1	ALL	BAM	0.00329	0	887456	10.76	0.50209	0.00023	0	0	0	0	ALL.wgs.coriell_phase3_samples.20121126.snps.affy_6.genotypes.vcf.gz	PASS	2013-05-10 19:18:08	/nfs/1000g-archive/vol1/ftp/data/NA11920/alignment/NA11920.mapped.ILLUMINA.bwa.CEU.low_coverage.20130415.bam		NA11920.mapped.ILLUMINA.bwa.CEU.low_coverage.20130415.bam
58622	HG03114.mapped.ILLUMINA.bwa.ESN.low_coverage.20130415.bam	HG03114	1	ALL	BAM	0.00328	0.00351	835395	9.28	0.50064	0.00014	0.50141	9e-05	9.305	0.9984	ESN.wgs.coriell_phase3_samples.20121126.snps.affy_6.genotypes.vcf.gz	PASS	2013-05-14 03:02:24	/nfs/1000g-archive/vol1/ftp/data/HG03114/alignment/HG03114.mapped.ILLUMINA.bwa.ESN.low_coverage.20130415.bam		HG03114.mapped.ILLUMINA.bwa.ESN.low_coverage.20130415.bam
21736	HG03225.mapped.ILLUMINA.bwa.MSL.low_coverage.20130415.bam	HG03225	1	ALL	BAM	0.00328	0	1753219	6.63	0.49882	0.00037	0	0	0	0	ALL.omni_wg_2141_filtered.vcf.gz	PASS	2013-05-03 08:16:18	/nfs/1000g-archive/vol1/ftp/data/HG03225/alignment/HG03225.mapped.ILLUMINA.bwa.MSL.low_coverage.20130415.bam		HG03225.mapped.ILLUMINA.bwa.MSL.low_coverage.20130415.bam
21622	HG03567.mapped.ILLUMINA.bwa.MSL.low_coverage.20130415.bam	HG03567	1	ALL	BAM	0.00328	0	1753219	8.32	0.49927	0.00038	0	0	0	0	ALL.omni_wg_2141_filtered.vcf.gz	PASS	2013-05-03 07:52:42	/nfs/1000g-archive/vol1/ftp/data/HG03567/alignment/HG03567.mapped.ILLUMINA.bwa.MSL.low_coverage.20130415.bam		HG03567.mapped.ILLUMINA.bwa.MSL.low_coverage.20130415.bam
31993	NA18791.mapped.ILLUMINA.bwa.CHB.low_coverage.20130415.bam	NA18791	0	ALL	BAM	0.00328	0	1252142	5.06	0.50218	0.00098	0	0	0	0	CHB.omni_wg_2141_filtered.vcf.gz	PASS	2013-05-08 01:36:35	/nfs/1000g-archive/vol1/ftp/data/NA18791/alignment/NA18791.mapped.ILLUMINA.bwa.CHB.low_coverage.20130415.bam		NA18791.mapped.ILLUMINA.bwa.CHB.low_coverage.20130415.bam
12028	NA21126.mapped.ILLUMINA.bwa.GIH.low_coverage.20121211.bam	NA21126	1	ALL	BAM	0.00328	0	1368816	9.53	0.50197	0.00041	0	0	0	0	GIH.omni_wg_2141_filtered.vcf.gz	PASS	2013-05-17 04:05:43	/nfs/1000g-archive/vol1/ftp/data/NA21126/alignment/NA21126.mapped.ILLUMINA.bwa.GIH.low_coverage.20121211.bam		NA21126.mapped.ILLUMINA.bwa.GIH.low_coverage.20121211.bam
12281	HG03259.mapped.ILLUMINA.bwa.GWD.low_coverage.20121211.bam	HG03259	1	ALL	BAM	0.00327	0.00422	840560	9.04	0.50049	0.00013	0.502	8e-05	9.062	0.996	GWD.wgs.coriell_phase3_samples.20121126.snps.affy_6.genotypes.vcf.gz	PASS	2013-05-16 15:16:50	/nfs/1000g-archive/vol1/ftp/data/HG03259/alignment/HG03259.mapped.ILLUMINA.bwa.GWD.low_coverage.20121211.bam		HG03259.mapped.ILLUMINA.bwa.GWD.low_coverage.20121211.bam
12359	HG03937.mapped.ILLUMINA.bwa.BEB.low_coverage.20121211.bam	HG03937	1	ALL	BAM	0.00327	0.00367	783628	6.06	0.50015	5e-05	0.5004	7e-05	6.072	0.9983	BEB.wgs.coriell_phase3_samples.20121126.snps.affy_6.genotypes.vcf.gz	PASS	2013-05-16 09:20:57	/nfs/1000g-archive/vol1/ftp/data/HG03937/alignment/HG03937.mapped.ILLUMINA.bwa.BEB.low_coverage.20121211.bam		HG03937.mapped.ILLUMINA.bwa.BEB.low_coverage.20121211.bam
13132	HG03848.mapped.ILLUMINA.bwa.STU.low_coverage.20121211.bam	HG03848	1	ALL	BAM	0.00327	0.00355	779732	6.13	0.50001	3e-05	0.50037	2e-05	6.097	1.0249	STU.wgs.coriell_phase3_samples.20121126.snps.affy_6.genotypes.vcf.gz	PASS	2013-05-16 17:58:26	/nfs/1000g-archive/vol1/ftp/data/HG03848/alignment/HG03848.mapped.ILLUMINA.bwa.STU.low_coverage.20121211.bam		HG03848.mapped.ILLUMINA.bwa.STU.low_coverage.20121211.bam
28570	HG03898.mapped.ILLUMINA.bwa.STU.low_coverage.20130415.bam	HG03898	1	ALL	BAM	0.00327	0.00344	779732	10.18	0.5007	0.00011	0.50074	0.0001	10.195	0.9987	STU.wgs.coriell_phase3_samples.20121126.snps.affy_6.genotypes.vcf.gz	PASS	2013-05-05 11:54:23	/nfs/1000g-archive/vol1/ftp/data/HG03898/alignment/HG03898.mapped.ILLUMINA.bwa.STU.low_coverage.20130415.bam		HG03898.mapped.ILLUMINA.bwa.STU.low_coverage.20130415.bam
8159	NA06989.mapped.ILLUMINA.bwa.CEU.low_coverage.20120522.bam	NA06989	1	ALL	BAM	0.00326	0.00368	1400785	4.46	0.50261	0.00065	0.50262	0.00052	4.47	0.9975	CEU.omni_wg_2141_filtered.vcf.gz	PASS	2013-05-17 04:28:23	/nfs/1000g-archive/vol1/ftp/data/NA06989/alignment/NA06989.mapped.ILLUMINA.bwa.CEU.low_coverage.20120522.bam		NA06989.mapped.ILLUMINA.bwa.CEU.low_coverage.20120522.bam
7849	NA19070.mapped.ILLUMINA.bwa.JPT.low_coverage.20120522.bam	NA19070	1	ALL	BAM	0.00326	0.00346	1243522	6.61	0.50316	0.00081	0.50364	0.00086	6.638	0.9966	JPT.omni_wg_2141_filtered.vcf.gz	PASS	2013-05-17 04:28:40	/nfs/1000g-archive/vol1/ftp/data/NA19070/alignment/NA19070.mapped.ILLUMINA.bwa.JPT.low_coverage.20120522.bam		NA19070.mapped.ILLUMINA.bwa.JPT.low_coverage.20120522.bam
12673	HG02885.mapped.ILLUMINA.bwa.GWD.low_coverage.20121211.bam	HG02885	1	ALL	BAM	0.00326	0	1753219	6.78	0.49885	0.00057	0	0	0	0	ALL.omni_wg_2141_filtered.vcf.gz	PASS	2013-05-16 21:02:24	/nfs/1000g-archive/vol1/ftp/data/HG02885/alignment/HG02885.mapped.ILLUMINA.bwa.GWD.low_coverage.20121211.bam		HG02885.mapped.ILLUMINA.bwa.GWD.low_coverage.20121211.bam
9767	NA18867.mapped.ILLUMINA.bwa.YRI.low_coverage.20120522.bam	NA18867	1	ALL	BAM	0.00325	0.00345	1559108	11.17	0.50441	0.00046	0.50508	0.00054	11.224	0.9935	YRI.omni_wg_2141_filtered.vcf.gz	PASS	2013-05-16 22:31:23	/nfs/1000g-archive/vol1/ftp/data/NA18867/alignment/NA18867.mapped.ILLUMINA.bwa.YRI.low_coverage.20120522.bam		NA18867.mapped.ILLUMINA.bwa.YRI.low_coverage.20120522.bam
60898	HG03136.mapped.ILLUMINA.bwa.ESN.low_coverage.20130415.bam	HG03136	1	ALL	BAM	0.00325	0.00342	835395	8.17	0.49956	0.00031	0.5002	0.00034	8.136	1.0258	ESN.wgs.coriell_phase3_samples.20121126.snps.affy_6.genotypes.vcf.gz	PASS	2013-05-14 04:34:36	/nfs/1000g-archive/vol1/ftp/data/HG03136/alignment/HG03136.mapped.ILLUMINA.bwa.ESN.low_coverage.20130415.bam		HG03136.mapped.ILLUMINA.bwa.ESN.low_coverage.20130415.bam
61075	HG02808.mapped.ILLUMINA.bwa.GWD.low_coverage.20130415.bam	HG02808	1	ALL	BAM	0.00325	0	1753219	8.25	0.49948	0.00035	0	0	0	0	ALL.omni_wg_2141_filtered.vcf.gz	PASS	2013-05-14 04:40:20	/nfs/1000g-archive/vol1/ftp/data/HG02808/alignment/HG02808.mapped.ILLUMINA.bwa.GWD.low_coverage.20130415.bam		HG02808.mapped.ILLUMINA.bwa.GWD.low_coverage.20130415.bam
44693	HG03743.mapped.ILLUMINA.bwa.STU.low_coverage.20130415.bam	HG03743	1	ALL	BAM	0.00325	0	1753219	9.37	0.50059	0.00017	0	0	0	0	ALL.omni_wg_2141_filtered.vcf.gz	PASS	2013-05-10 12:42:03	/nfs/1000g-archive/vol1/ftp/data/HG03743/alignment/HG03743.mapped.ILLUMINA.bwa.STU.low_coverage.20130415.bam		HG03743.mapped.ILLUMINA.bwa.STU.low_coverage.20130415.bam
34376	NA18965.mapped.ILLUMINA.bwa.JPT.low_coverage.20130415.bam	NA18965	1	ALL	BAM	0.00324	0.00294	1243522	5.62	0.50205	0.00051	0.50247	0.00061	5.623	1.0005	JPT.omni_wg_2141_filtered.vcf.gz	PASS	2013-05-08 05:05:43	/nfs/1000g-archive/vol1/ftp/data/NA18965/alignment/NA18965.mapped.ILLUMINA.bwa.JPT.low_coverage.20130415.bam		NA18965.mapped.ILLUMINA.bwa.JPT.low_coverage.20130415.bam
11577	HG02490.mapped.ILLUMINA.bwa.PJL.low_coverage.20121211.bam	HG02490	1	ALL	BAM	0.00324	0	1753219	10.27	0.50119	0.00035	0	0	0	0	ALL.omni_wg_2141_filtered.vcf.gz	PASS	2013-05-17 09:57:34	/nfs/1000g-archive/vol1/ftp/data/HG02490/alignment/HG02490.mapped.ILLUMINA.bwa.PJL.low_coverage.20121211.bam		HG02490.mapped.ILLUMINA.bwa.PJL.low_coverage.20121211.bam
8881	HG01108.mapped.ILLUMINA.bwa.PUR.low_coverage.20120522.bam	HG01108	1	ALL	BAM	0.00323	0.00598	1558284	4.45	0.49929	0.00179	0.50177	0.00051	4.462	0.9961	PUR.omni_wg_2141_filtered.vcf.gz	PASS	2013-05-16 21:48:36	/nfs/1000g-archive/vol1/ftp/data/HG01108/alignment/HG01108.mapped.ILLUMINA.bwa.PUR.low_coverage.20120522.bam		HG01108.mapped.ILLUMINA.bwa.PUR.low_coverage.20120522.bam
12418	HG03270.mapped.ILLUMINA.bwa.ESN.low_coverage.20121211.bam	HG03270	1	ALL	BAM	0.00323	0.00303	835395	5.89	0.50021	4e-05	0.50074	6e-05	5.894	0.9983	ESN.wgs.coriell_phase3_samples.20121126.snps.affy_6.genotypes.vcf.gz	PASS	2013-05-16 07:27:13	/nfs/1000g-archive/vol1/ftp/data/HG03270/alignment/HG03270.mapped.ILLUMINA.bwa.ESN.low_coverage.20121211.bam		HG03270.mapped.ILLUMINA.bwa.ESN.low_coverage.20121211.bam
12383	NA19472.mapped.ILLUMINA.bwa.LWK.low_coverage.20120522.bam	NA19472	1	ALL	BAM	0.00323	0	887456	7.95	0.50113	0.00015	0	0	0	0	ALL.wgs.coriell_phase3_samples.20121126.snps.affy_6.genotypes.vcf.gz	PASS	2013-05-16 13:19:18	/nfs/1000g-archive/vol1/ftp/data/NA19472/alignment/NA19472.mapped.ILLUMINA.bwa.LWK.low_coverage.20120522.bam		NA19472.mapped.ILLUMINA.bwa.LWK.low_coverage.20120522.bam
21850	HG03756.mapped.ILLUMINA.bwa.STU.low_coverage.20130415.bam	HG03756	1	ALL	BAM	0.00322	0.00354	779732	10.21	0.50088	0.00014	0.50047	0.00014	10.233	0.9966	STU.wgs.coriell_phase3_samples.20121126.snps.affy_6.genotypes.vcf.gz	PASS	2013-05-03 08:36:05	/nfs/1000g-archive/vol1/ftp/data/HG03756/alignment/HG03756.mapped.ILLUMINA.bwa.STU.low_coverage.20130415.bam		HG03756.mapped.ILLUMINA.bwa.STU.low_coverage.20130415.bam
43951	HG03730.mapped.ILLUMINA.bwa.ITU.low_coverage.20130415.bam	HG03730	1	ALL	BAM	0.00321	0.00316	781365	8.08	0.50133	0.00013	0.50281	0.00012	8.1	0.9976	ITU.wgs.coriell_phase3_samples.20121126.snps.affy_6.genotypes.vcf.gz	PASS	2013-05-10 11:50:58	/nfs/1000g-archive/vol1/ftp/data/HG03730/alignment/HG03730.mapped.ILLUMINA.bwa.ITU.low_coverage.20130415.bam		HG03730.mapped.ILLUMINA.bwa.ITU.low_coverage.20130415.bam
27572	HG03802.mapped.ILLUMINA.bwa.BEB.low_coverage.20130415.bam	HG03802	1	ALL	BAM	0.00321	0	1753219	10.3	0.50237	0.00022	0	0	0	0	ALL.omni_wg_2141_filtered.vcf.gz	PASS	2013-05-05 10:41:45	/nfs/1000g-archive/vol1/ftp/data/HG03802/alignment/HG03802.mapped.ILLUMINA.bwa.BEB.low_coverage.20130415.bam		HG03802.mapped.ILLUMINA.bwa.BEB.low_coverage.20130415.bam
13102	HG02804.mapped.ILLUMINA.bwa.GWD.low_coverage.20121211.bam	HG02804	1	ALL	BAM	0.0032	0.00344	840560	10.08	0.50064	7e-05	0.50088	8e-05	10.056	1.0232	GWD.wgs.coriell_phase3_samples.20121126.snps.affy_6.genotypes.vcf.gz	PASS	2013-05-16 13:52:30	/nfs/1000g-archive/vol1/ftp/data/HG02804/alignment/HG02804.mapped.ILLUMINA.bwa.GWD.low_coverage.20121211.bam		HG02804.mapped.ILLUMINA.bwa.GWD.low_coverage.20121211.bam
15992	HG01459.mapped.ILLUMINA.bwa.CLM.low_coverage.20130415.bam	HG01459	1	ALL	BAM	0.0032	0	1493063	7.56	0.50144	0.00033	0	0	0	0	CLM.omni_wg_2141_filtered.vcf.gz	PASS	2013-04-30 18:24:38	/nfs/1000g-archive/vol1/ftp/data/HG01459/alignment/HG01459.mapped.ILLUMINA.bwa.CLM.low_coverage.20130415.bam		HG01459.mapped.ILLUMINA.bwa.CLM.low_coverage.20130415.bam
12259	HG02642.mapped.ILLUMINA.bwa.GWD.low_coverage.20121211.bam	HG02642	1	ALL	BAM	0.0032	0	1753219	7.93	0.49988	0.00039	0	0	0	0	ALL.omni_wg_2141_filtered.vcf.gz	PASS	2013-05-17 11:37:36	/nfs/1000g-archive/vol1/ftp/data/HG02642/alignment/HG02642.mapped.ILLUMINA.bwa.GWD.low_coverage.20121211.bam		HG02642.mapped.ILLUMINA.bwa.GWD.low_coverage.20121211.bam
41620	NA20772.mapped.ILLUMINA.bwa.TSI.low_coverage.20130415.bam	NA20772	1	ALL	BAM	0.0032	0	887456	5.66	0.50453	0.00058	0	0	0	0	ALL.wgs.coriell_phase3_samples.20121126.snps.affy_6.genotypes.vcf.gz	PASS	2013-05-10 10:19:16	/nfs/1000g-archive/vol1/ftp/data/NA20772/alignment/NA20772.mapped.ILLUMINA.bwa.TSI.low_coverage.20130415.bam		NA20772.mapped.ILLUMINA.bwa.TSI.low_coverage.20130415.bam
12948	NA18960.mapped.ILLUMINA.bwa.JPT.low_coverage.20120522.bam	NA18960	1	ALL	BAM	0.00319	0	887456	12.59	0.50174	0.00027	0	0	0	0	ALL.wgs.coriell_phase3_samples.20121126.snps.affy_6.genotypes.vcf.gz	PASS	2013-05-16 20:39:31	/nfs/1000g-archive/vol1/ftp/data/NA18960/alignment/NA18960.mapped.ILLUMINA.bwa.JPT.low_coverage.20120522.bam		NA18960.mapped.ILLUMINA.bwa.JPT.low_coverage.20120522.bam
10781	HG00123.mapped.ILLUMINA.bwa.GBR.low_coverage.20120522.bam	HG00123	1	ALL	BAM	0.00318	0.00294	1389642	6.83	0.50532	0.00037	0.50575	0.00049	6.873	0.9918	GBR.omni_wg_2141_filtered.vcf.gz	PASS	2013-05-17 06:45:49	/nfs/1000g-archive/vol1/ftp/data/HG00123/alignment/HG00123.mapped.ILLUMINA.bwa.GBR.low_coverage.20120522.bam		HG00123.mapped.ILLUMINA.bwa.GBR.low_coverage.20120522.bam
55297	HG01894.mapped.ILLUMINA.bwa.ACB.low_coverage.20130415.bam	HG01894	1	ALL	BAM	0.00318	0	849391	5.4	0.50196	0.00098	0	0	0	0	ACB.wgs.coriell_phase3_samples.20121126.snps.affy_6.genotypes.vcf.gz	PASS	2013-05-13 22:53:30	/nfs/1000g-archive/vol1/ftp/data/HG01894/alignment/HG01894.mapped.ILLUMINA.bwa.ACB.low_coverage.20130415.bam		HG01894.mapped.ILLUMINA.bwa.ACB.low_coverage.20130415.bam
46100	HG03787.mapped.ILLUMINA.bwa.ITU.low_coverage.20130415.bam	HG03787	1	ALL	BAM	0.00318	0	1753219	9.03	0.50152	0.0002	0	0	0	0	ALL.omni_wg_2141_filtered.vcf.gz	PASS	2013-05-10 13:36:18	/nfs/1000g-archive/vol1/ftp/data/HG03787/alignment/HG03787.mapped.ILLUMINA.bwa.ITU.low_coverage.20130415.bam		HG03787.mapped.ILLUMINA.bwa.ITU.low_coverage.20130415.bam
27229	HG03797.mapped.ILLUMINA.bwa.BEB.low_coverage.20130415.bam	HG03797	0	ALL	BAM	0.00318	0	1753219	8.73	0.50293	0.00039	0	0	0	0	ALL.omni_wg_2141_filtered.vcf.gz	PASS	2013-05-05 09:14:53	/nfs/1000g-archive/vol1/ftp/data/HG03797/alignment/HG03797.mapped.ILLUMINA.bwa.BEB.low_coverage.20130415.bam		HG03797.mapped.ILLUMINA.bwa.BEB.low_coverage.20130415.bam
12225	HG03812.mapped.ILLUMINA.bwa.BEB.low_coverage.20121211.bam	HG03812	1	ALL	BAM	0.00317	0.00347	783628	5.37	0.50071	0.00011	0.50086	0.00013	5.349	1.0226	BEB.wgs.coriell_phase3_samples.20121126.snps.affy_6.genotypes.vcf.gz	PASS	2013-05-16 16:45:56	/nfs/1000g-archive/vol1/ftp/data/HG03812/alignment/HG03812.mapped.ILLUMINA.bwa.BEB.low_coverage.20121211.bam		HG03812.mapped.ILLUMINA.bwa.BEB.low_coverage.20121211.bam
13079	HG02603.mapped.ILLUMINA.bwa.PJL.low_coverage.20121211.bam	HG02603	1	ALL	BAM	0.00317	0.00345	781539	10.28	0.5012	0.00035	0.50198	0.00034	10.243	1.0224	PJL.wgs.coriell_phase3_samples.20121126.snps.affy_6.genotypes.vcf.gz	PASS	2013-05-16 18:13:39	/nfs/1000g-archive/vol1/ftp/data/HG02603/alignment/HG02603.mapped.ILLUMINA.bwa.PJL.low_coverage.20121211.bam		HG02603.mapped.ILLUMINA.bwa.PJL.low_coverage.20121211.bam
6903	NA18910.mapped.ILLUMINA.bwa.YRI.low_coverage.20120522.bam	NA18910	1	ALL	BAM	0.00317	0.00333	1559108	6.05	0.50438	0.00079	0.50619	0.00093	6.091	0.9922	YRI.omni_wg_2141_filtered.vcf.gz	PASS	2013-05-16 20:49:23	/nfs/1000g-archive/vol1/ftp/data/NA18910/alignment/NA18910.mapped.ILLUMINA.bwa.YRI.low_coverage.20120522.bam		NA18910.mapped.ILLUMINA.bwa.YRI.low_coverage.20120522.bam
9653	HG02343.mapped.ILLUMINA.bwa.ACB.low_coverage.20120522.bam	HG02343	1	ALL	BAM	0.00317	0.00299	1597764	7.09	0.50262	0.00057	0.50276	0.00052	7.09	1.002	ACB.omni_wg_2141_filtered.vcf.gz	PASS	2013-05-16 23:50:11	/nfs/1000g-archive/vol1/ftp/data/HG02343/alignment/HG02343.mapped.ILLUMINA.bwa.ACB.low_coverage.20120522.bam		HG02343.mapped.ILLUMINA.bwa.ACB.low_coverage.20120522.bam
13155	HG03024.mapped.ILLUMINA.bwa.GWD.low_coverage.20121211.bam	HG03024	1	ALL	BAM	0.00316	0.00379	840560	7.57	0.50056	0.00025	0.50023	0.00027	7.539	1.0263	GWD.wgs.coriell_phase3_samples.20121126.snps.affy_6.genotypes.vcf.gz	PASS	2013-05-16 17:51:36	/nfs/1000g-archive/vol1/ftp/data/HG03024/alignment/HG03024.mapped.ILLUMINA.bwa.GWD.low_coverage.20121211.bam		HG03024.mapped.ILLUMINA.bwa.GWD.low_coverage.20121211.bam
12817	HG03469.mapped.ILLUMINA.bwa.MSL.low_coverage.20121211.bam	HG03469	1	ALL	BAM	0.00316	0.00345	838168	11.36	0.50097	0.00015	0.50116	0.00023	11.327	1.0232	MSL.wgs.coriell_phase3_samples.20121126.snps.affy_6.genotypes.vcf.gz	PASS	2013-05-16 17:29:41	/nfs/1000g-archive/vol1/ftp/data/HG03469/alignment/HG03469.mapped.ILLUMINA.bwa.MSL.low_coverage.20121211.bam		HG03469.mapped.ILLUMINA.bwa.MSL.low_coverage.20121211.bam
9428	NA18873.mapped.ILLUMINA.bwa.YRI.low_coverage.20120522.bam	NA18873	1	ALL	BAM	0.00316	0.00323	1559108	7.28	0.50301	0.00034	0.50345	0.00041	7.293	0.9976	YRI.omni_wg_2141_filtered.vcf.gz	PASS	2013-05-16 17:15:06	/nfs/1000g-archive/vol1/ftp/data/NA18873/alignment/NA18873.mapped.ILLUMINA.bwa.YRI.low_coverage.20120522.bam		NA18873.mapped.ILLUMINA.bwa.YRI.low_coverage.20120522.bam
62314	HG02594.mapped.ILLUMINA.bwa.GWD.low_coverage.20130415.bam	HG02594	1	ALL	BAM	0.00316	0	1753219	11.74	0.50103	0.00037	0	0	0	0	ALL.omni_wg_2141_filtered.vcf.gz	PASS	2013-05-14 05:47:06	/nfs/1000g-archive/vol1/ftp/data/HG02594/alignment/HG02594.mapped.ILLUMINA.bwa.GWD.low_coverage.20130415.bam		HG02594.mapped.ILLUMINA.bwa.GWD.low_coverage.20130415.bam
8168	HG00306.mapped.ILLUMINA.bwa.FIN.low_coverage.20120522.bam	HG00306	1	ALL	BAM	0.00315	0.00412	1385013	3.8	0.50334	0.00046	0.50226	0.00055	3.798	1.0055	FIN.omni_wg_2141_filtered.vcf.gz	PASS	2013-05-17 08:45:22	/nfs/1000g-archive/vol1/ftp/data/HG00306/alignment/HG00306.mapped.ILLUMINA.bwa.FIN.low_coverage.20120522.bam		HG00306.mapped.ILLUMINA.bwa.FIN.low_coverage.20120522.bam
21331	HG03700.mapped.ILLUMINA.bwa.PJL.low_coverage.20130415.bam	HG03700	0	ALL	BAM	0.00315	0	1753219	6.92	0.50142	7e-05	0	0	0	0	ALL.omni_wg_2141_filtered.vcf.gz	PASS	2013-05-03 07:12:06	/nfs/1000g-archive/vol1/ftp/data/HG03700/alignment/HG03700.mapped.ILLUMINA.bwa.PJL.low_coverage.20130415.bam		HG03700.mapped.ILLUMINA.bwa.PJL.low_coverage.20130415.bam
41720	HG03815.mapped.ILLUMINA.bwa.BEB.low_coverage.20130415.bam	HG03815	1	ALL	BAM	0.00315	0	1753219	8.91	0.50238	0.00046	0	0	0	0	ALL.omni_wg_2141_filtered.vcf.gz	PASS	2013-05-10 10:22:28	/nfs/1000g-archive/vol1/ftp/data/HG03815/alignment/HG03815.mapped.ILLUMINA.bwa.BEB.low_coverage.20130415.bam		HG03815.mapped.ILLUMINA.bwa.BEB.low_coverage.20130415.bam
10597	NA20878.mapped.ILLUMINA.bwa.GIH.low_coverage.20120522.bam	NA20878	1	ALL	BAM	0.00314	0.00358	1368816	4.16	0.50326	0.00024	0.50256	0.00046	4.165	0.9979	GIH.omni_wg_2141_filtered.vcf.gz	PASS	2013-05-17 02:01:06	/nfs/1000g-archive/vol1/ftp/data/NA20878/alignment/NA20878.mapped.ILLUMINA.bwa.GIH.low_coverage.20120522.bam		NA20878.mapped.ILLUMINA.bwa.GIH.low_coverage.20120522.bam
12478	HG02814.mapped.ILLUMINA.bwa.GWD.low_coverage.20121211.bam	HG02814	1	ALL	BAM	0.00314	0.00324	840560	6.13	0.50061	0.00041	0.50028	0.00022	6.139	0.9986	GWD.wgs.coriell_phase3_samples.20121126.snps.affy_6.genotypes.vcf.gz	PASS	2013-05-16 16:19:39	/nfs/1000g-archive/vol1/ftp/data/HG02814/alignment/HG02814.mapped.ILLUMINA.bwa.GWD.low_coverage.20121211.bam		HG02814.mapped.ILLUMINA.bwa.GWD.low_coverage.20121211.bam
35132	NA18627.mapped.ILLUMINA.bwa.CHB.low_coverage.20130415.bam	NA18627	1	ALL	BAM	0.00314	0.0031	1252142	7.67	0.50149	0.00038	0.50179	0.00056	7.677	0.9983	CHB.omni_wg_2141_filtered.vcf.gz	PASS	2013-05-08 07:12:50	/nfs/1000g-archive/vol1/ftp/data/NA18627/alignment/NA18627.mapped.ILLUMINA.bwa.CHB.low_coverage.20130415.bam		NA18627.mapped.ILLUMINA.bwa.CHB.low_coverage.20130415.bam
9527	HG01188.mapped.ILLUMINA.bwa.PUR.low_coverage.20120522.bam	HG01188	1	ALL	BAM	0.00314	0	854341	7.31	0.50174	0.0003	0	0	0	0	PUR.wgs.coriell_phase3_samples.20121126.snps.affy_6.genotypes.vcf.gz	PASS	2013-05-16 09:40:00	/nfs/1000g-archive/vol1/ftp/data/HG01188/alignment/HG01188.mapped.ILLUMINA.bwa.PUR.low_coverage.20120522.bam		HG01188.mapped.ILLUMINA.bwa.PUR.low_coverage.20120522.bam
13228	HG02716.mapped.ILLUMINA.bwa.GWD.low_coverage.20121211.bam	HG02716	1	ALL	BAM	0.00314	0	1753219	8.83	0.5002	0.00037	0	0	0	0	ALL.omni_wg_2141_filtered.vcf.gz	PASS	2013-05-17 05:32:40	/nfs/1000g-archive/vol1/ftp/data/HG02716/alignment/HG02716.mapped.ILLUMINA.bwa.GWD.low_coverage.20121211.bam		HG02716.mapped.ILLUMINA.bwa.GWD.low_coverage.20121211.bam
6601	HG01670.mapped.ILLUMINA.bwa.IBS.low_coverage.20120522.bam	HG01670	1	ALL	BAM	0.00313	0.00381	1400201	4.15	0.50109	0.0003	0.50195	0.00053	4.152	1.0017	IBS.omni_wg_2141_filtered.vcf.gz	PASS	2013-05-17 04:55:54	/nfs/1000g-archive/vol1/ftp/data/HG01670/alignment/HG01670.mapped.ILLUMINA.bwa.IBS.low_coverage.20120522.bam		HG01670.mapped.ILLUMINA.bwa.IBS.low_coverage.20120522.bam
9864	HG01800.mapped.ILLUMINA.bwa.CDX.low_coverage.20120522.bam	HG01800	1	ALL	BAM	0.00313	0.00351	1235978	6.96	0.50111	0.00014	0.50141	0.00017	6.962	1.0022	CDX.omni_wg_2141_filtered.vcf.gz	PASS	2013-05-17 05:58:57	/nfs/1000g-archive/vol1/ftp/data/HG01800/alignment/HG01800.mapped.ILLUMINA.bwa.CDX.low_coverage.20120522.bam		HG01800.mapped.ILLUMINA.bwa.CDX.low_coverage.20120522.bam
27194	HG03803.mapped.ILLUMINA.bwa.BEB.low_coverage.20130415.bam	HG03803	1	ALL	BAM	0.00313	0.00335	783628	9.83	0.50037	0.00031	0.50165	0.00035	9.809	1.0198	BEB.wgs.coriell_phase3_samples.20121126.snps.affy_6.genotypes.vcf.gz	PASS	2013-05-05 09:08:06	/nfs/1000g-archive/vol1/ftp/data/HG03803/alignment/HG03803.mapped.ILLUMINA.bwa.BEB.low_coverage.20130415.bam		HG03803.mapped.ILLUMINA.bwa.BEB.low_coverage.20130415.bam
45423	HG03874.mapped.ILLUMINA.bwa.ITU.low_coverage.20130415.bam	HG03874	1	ALL	BAM	0.00313	0	1753219	9.87	0.50124	0.00024	0	0	0	0	ALL.omni_wg_2141_filtered.vcf.gz	PASS	2013-05-10 13:12:44	/nfs/1000g-archive/vol1/ftp/data/HG03874/alignment/HG03874.mapped.ILLUMINA.bwa.ITU.low_coverage.20130415.bam		HG03874.mapped.ILLUMINA.bwa.ITU.low_coverage.20130415.bam
12729	NA19026.mapped.ILLUMINA.bwa.LWK.low_coverage.20121211.bam	NA19026	1	ALL	BAM	0.00313	0	887456	8.56	0.50008	6e-05	0	0	0	0	ALL.wgs.coriell_phase3_samples.20121126.snps.affy_6.genotypes.vcf.gz	PASS	2013-05-16 17:35:09	/nfs/1000g-archive/vol1/ftp/data/NA19026/alignment/NA19026.mapped.ILLUMINA.bwa.LWK.low_coverage.20121211.bam		NA19026.mapped.ILLUMINA.bwa.LWK.low_coverage.20121211.bam
20685	HG03082.mapped.ILLUMINA.bwa.MSL.low_coverage.20130415.bam	HG03082	1	ALL	BAM	0.00312	0.00329	838168	7.26	0.50079	0.00017	0.50094	0.00016	7.264	0.9999	MSL.wgs.coriell_phase3_samples.20121126.snps.affy_6.genotypes.vcf.gz	PASS	2013-05-03 05:25:14	/nfs/1000g-archive/vol1/ftp/data/HG03082/alignment/HG03082.mapped.ILLUMINA.bwa.MSL.low_coverage.20130415.bam		HG03082.mapped.ILLUMINA.bwa.MSL.low_coverage.20130415.bam
40725	HG03006.mapped.ILLUMINA.bwa.BEB.low_coverage.20130415.bam	HG03006	1	ALL	BAM	0.00311	0.00327	783628	8.48	0.50164	0.00023	0.50202	0.0003	8.464	1.0185	BEB.wgs.coriell_phase3_samples.20121126.snps.affy_6.genotypes.vcf.gz	PASS	2013-05-10 09:15:25	/nfs/1000g-archive/vol1/ftp/data/HG03006/alignment/HG03006.mapped.ILLUMINA.bwa.BEB.low_coverage.20130415.bam		HG03006.mapped.ILLUMINA.bwa.BEB.low_coverage.20130415.bam
17193	HG01620.mapped.ILLUMINA.bwa.IBS.low_coverage.20130415.bam	HG01620	1	ALL	BAM	0.00311	0.00318	1400201	7.76	0.50098	0.00017	0.50062	0.00029	7.76	1.0027	IBS.omni_wg_2141_filtered.vcf.gz	PASS	2013-04-30 20:13:57	/nfs/1000g-archive/vol1/ftp/data/HG01620/alignment/HG01620.mapped.ILLUMINA.bwa.IBS.low_coverage.20130415.bam		HG01620.mapped.ILLUMINA.bwa.IBS.low_coverage.20130415.bam
40991	HG03886.mapped.ILLUMINA.bwa.STU.low_coverage.20130415.bam	HG03886	1	ALL	BAM	0.00311	0.00285	779732	8.77	0.50165	0.00013	0.5026	0.00025	8.808	0.9954	STU.wgs.coriell_phase3_samples.20121126.snps.affy_6.genotypes.vcf.gz	PASS	2013-05-10 09:46:41	/nfs/1000g-archive/vol1/ftp/data/HG03886/alignment/HG03886.mapped.ILLUMINA.bwa.STU.low_coverage.20130415.bam		HG03886.mapped.ILLUMINA.bwa.STU.low_coverage.20130415.bam
10595	HG01951.mapped.ILLUMINA.bwa.PEL.low_coverage.20120522.bam	HG01951	1	ALL	BAM	0.0031	0.00345	1304517	7.48	0.50152	0.00025	0.50131	0.00048	7.489	1.0011	PEL.omni_wg_2141_filtered.vcf.gz	PASS	2013-05-17 02:00:14	/nfs/1000g-archive/vol1/ftp/data/HG01951/alignment/HG01951.mapped.ILLUMINA.bwa.PEL.low_coverage.20120522.bam		HG01951.mapped.ILLUMINA.bwa.PEL.low_coverage.20120522.bam
43406	HG03727.mapped.ILLUMINA.bwa.ITU.low_coverage.20130415.bam	HG03727	1	ALL	BAM	0.0031	0.00332	781365	15.46	0.50049	0.00017	0.50101	0.00015	15.419	1.0199	ITU.wgs.coriell_phase3_samples.20121126.snps.affy_6.genotypes.vcf.gz	PASS	2013-05-10 11:35:31	/nfs/1000g-archive/vol1/ftp/data/HG03727/alignment/HG03727.mapped.ILLUMINA.bwa.ITU.low_coverage.20130415.bam		HG03727.mapped.ILLUMINA.bwa.ITU.low_coverage.20130415.bam
8953	HG02325.mapped.ILLUMINA.bwa.ACB.low_coverage.20120522.bam	HG02325	1	ALL	BAM	0.0031	0	849391	6.44	0.50139	0.0005	0	0	0	0	ACB.wgs.coriell_phase3_samples.20121126.snps.affy_6.genotypes.vcf.gz	PASS	2013-05-16 11:59:34	/nfs/1000g-archive/vol1/ftp/data/HG02325/alignment/HG02325.mapped.ILLUMINA.bwa.ACB.low_coverage.20120522.bam		HG02325.mapped.ILLUMINA.bwa.ACB.low_coverage.20120522.bam
62571	HG03715.mapped.ILLUMINA.bwa.ITU.low_coverage.20130415.bam	HG03715	0	ALL	BAM	0.0031	0	1753219	9.53	0.50089	0.0002	0	0	0	0	ALL.omni_wg_2141_filtered.vcf.gz	PASS	2013-05-14 06:07:53	/nfs/1000g-archive/vol1/ftp/data/HG03715/alignment/HG03715.mapped.ILLUMINA.bwa.ITU.low_coverage.20130415.bam		HG03715.mapped.ILLUMINA.bwa.ITU.low_coverage.20130415.bam
22891	HG03746.mapped.ILLUMINA.bwa.STU.low_coverage.20130415.bam	HG03746	1	ALL	BAM	0.0031	0	1753219	11.49	0.50132	0.00016	0	0	0	0	ALL.omni_wg_2141_filtered.vcf.gz	PASS	2013-05-03 11:38:22	/nfs/1000g-archive/vol1/ftp/data/HG03746/alignment/HG03746.mapped.ILLUMINA.bwa.STU.low_coverage.20130415.bam		HG03746.mapped.ILLUMINA.bwa.STU.low_coverage.20130415.bam
12430	HG03941.mapped.ILLUMINA.bwa.BEB.low_coverage.20121211.bam	HG03941	1	ALL	BAM	0.0031	0	1753219	8.63	0.50136	0.00017	0	0	0	0	ALL.omni_wg_2141_filtered.vcf.gz	PASS	2013-05-17 03:01:28	/nfs/1000g-archive/vol1/ftp/data/HG03941/alignment/HG03941.mapped.ILLUMINA.bwa.BEB.low_coverage.20121211.bam		HG03941.mapped.ILLUMINA.bwa.BEB.low_coverage.20121211.bam
57756	HG02573.mapped.ILLUMINA.bwa.GWD.low_coverage.20130415.bam	HG02573	1	ALL	BAM	0.00309	0.00368	840560	9.16	0.50068	0.00012	0.50073	0.0001	9.135	1.0227	GWD.wgs.coriell_phase3_samples.20121126.snps.affy_6.genotypes.vcf.gz	PASS	2013-05-14 02:41:13	/nfs/1000g-archive/vol1/ftp/data/HG02573/alignment/HG02573.mapped.ILLUMINA.bwa.GWD.low_coverage.20130415.bam		HG02573.mapped.ILLUMINA.bwa.GWD.low_coverage.20130415.bam
6879	NA18487.mapped.ILLUMINA.bwa.YRI.low_coverage.20120522.bam	NA18487	0	ALL	BAM	0.00309	0.00321	1559108	6.57	0.50445	0.00035	0.50478	0.00057	6.57	0.9997	YRI.omni_wg_2141_filtered.vcf.gz	PASS	2013-05-17 03:43:06	/nfs/1000g-archive/vol1/ftp/data/NA18487/alignment/NA18487.mapped.ILLUMINA.bwa.YRI.low_coverage.20120522.bam		NA18487.mapped.ILLUMINA.bwa.YRI.low_coverage.20120522.bam
41834	NA20797.mapped.ILLUMINA.bwa.TSI.low_coverage.20130415.bam	NA20797	1	ALL	BAM	0.00309	0.00315	1402149	7.41	0.50301	0.00022	0.5032	0.00029	7.419	0.9982	TSI.omni_wg_2141_filtered.vcf.gz	PASS	2013-05-10 10:31:03	/nfs/1000g-archive/vol1/ftp/data/NA20797/alignment/NA20797.mapped.ILLUMINA.bwa.TSI.low_coverage.20130415.bam		NA20797.mapped.ILLUMINA.bwa.TSI.low_coverage.20130415.bam
27795	HG03849.mapped.ILLUMINA.bwa.STU.low_coverage.20130415.bam	HG03849	1	ALL	BAM	0.00309	0.00313	779732	10.66	0.50112	0.00014	0.50138	0.00012	10.683	0.9983	STU.wgs.coriell_phase3_samples.20121126.snps.affy_6.genotypes.vcf.gz	PASS	2013-05-05 10:58:35	/nfs/1000g-archive/vol1/ftp/data/HG03849/alignment/HG03849.mapped.ILLUMINA.bwa.STU.low_coverage.20130415.bam		HG03849.mapped.ILLUMINA.bwa.STU.low_coverage.20130415.bam
12322	HG04002.mapped.ILLUMINA.bwa.ITU.low_coverage.20121211.bam	HG04002	1	ALL	BAM	0.00309	0.00305	781365	5.97	0.50087	7e-05	0.50107	0.00013	5.944	1.0228	ITU.wgs.coriell_phase3_samples.20121126.snps.affy_6.genotypes.vcf.gz	PASS	2013-05-16 16:45:38	/nfs/1000g-archive/vol1/ftp/data/HG04002/alignment/HG04002.mapped.ILLUMINA.bwa.ITU.low_coverage.20121211.bam		HG04002.mapped.ILLUMINA.bwa.ITU.low_coverage.20121211.bam
46725	HG03727.mapped.ILLUMINA.bwa.ITU.low_coverage.20130415.bam	HG03727	1	ALL	BAM	0.00309	0	1753219	15.4	0.50143	0.0002	0	0	0	0	ALL.omni_wg_2141_filtered.vcf.gz	PASS	2013-05-10 14:03:00	/nfs/1000g-archive/vol1/ftp/data/HG03727/alignment/HG03727.mapped.ILLUMINA.bwa.ITU.low_coverage.20130415.bam		HG03727.mapped.ILLUMINA.bwa.ITU.low_coverage.20130415.bam
10323	NA19914.mapped.ILLUMINA.bwa.ASW.low_coverage.20120522.bam	NA19914	1	ALL	BAM	0.00309	0	718973	15.76	0.50265	0.00037	0	0	0	0	ASW.wgs.coriell_phase3_samples.20121126.snps.affy_6.genotypes.vcf.gz	PASS	2013-05-16 14:46:37	/nfs/1000g-archive/vol1/ftp/data/NA19914/alignment/NA19914.mapped.ILLUMINA.bwa.ASW.low_coverage.20120522.bam		NA19914.mapped.ILLUMINA.bwa.ASW.low_coverage.20120522.bam
58398	HG03078.mapped.ILLUMINA.bwa.MSL.low_coverage.20130415.bam	HG03078	1	ALL	BAM	0.00308	0.00353	838168	9.42	0.50093	0.00029	0.50092	0.00016	9.397	1.0238	MSL.wgs.coriell_phase3_samples.20121126.snps.affy_6.genotypes.vcf.gz	PASS	2013-05-14 02:54:22	/nfs/1000g-archive/vol1/ftp/data/HG03078/alignment/HG03078.mapped.ILLUMINA.bwa.MSL.low_coverage.20130415.bam		HG03078.mapped.ILLUMINA.bwa.MSL.low_coverage.20130415.bam
22231	HG03746.mapped.ILLUMINA.bwa.STU.low_coverage.20130415.bam	HG03746	1	ALL	BAM	0.00308	0.00341	779732	11.53	0.50108	0.00013	0.50136	0.00012	11.486	1.0211	STU.wgs.coriell_phase3_samples.20121126.snps.affy_6.genotypes.vcf.gz	PASS	2013-05-03 09:59:48	/nfs/1000g-archive/vol1/ftp/data/HG03746/alignment/HG03746.mapped.ILLUMINA.bwa.STU.low_coverage.20130415.bam		HG03746.mapped.ILLUMINA.bwa.STU.low_coverage.20130415.bam
25552	HG04189.mapped.ILLUMINA.bwa.BEB.low_coverage.20130415.bam	HG04189	1	ALL	BAM	0.00308	0.00315	783628	7.12	0.50095	9e-05	0.50106	5e-05	7.134	0.9994	BEB.wgs.coriell_phase3_samples.20121126.snps.affy_6.genotypes.vcf.gz	PASS	2013-05-05 06:02:08	/nfs/1000g-archive/vol1/ftp/data/HG04189/alignment/HG04189.mapped.ILLUMINA.bwa.BEB.low_coverage.20130415.bam		HG04189.mapped.ILLUMINA.bwa.BEB.low_coverage.20130415.bam
46415	NA20535.mapped.ILLUMINA.bwa.TSI.low_coverage.20130415.bam	NA20535	1	ALL	BAM	0.00308	0.00307	1402149	8.27	0.50108	0.00017	0.50216	0.00031	8.277	0.9994	TSI.omni_wg_2141_filtered.vcf.gz	PASS	2013-05-10 13:45:11	/nfs/1000g-archive/vol1/ftp/data/NA20535/alignment/NA20535.mapped.ILLUMINA.bwa.TSI.low_coverage.20130415.bam		NA20535.mapped.ILLUMINA.bwa.TSI.low_coverage.20130415.bam
43097	HG03006.mapped.ILLUMINA.bwa.BEB.low_coverage.20130415.bam	HG03006	1	ALL	BAM	0.00308	0	1753219	8.46	0.50265	0.00013	0	0	0	0	ALL.omni_wg_2141_filtered.vcf.gz	PASS	2013-05-10 11:29:52	/nfs/1000g-archive/vol1/ftp/data/HG03006/alignment/HG03006.mapped.ILLUMINA.bwa.BEB.low_coverage.20130415.bam		HG03006.mapped.ILLUMINA.bwa.BEB.low_coverage.20130415.bam
44325	HG03788.mapped.ILLUMINA.bwa.ITU.low_coverage.20130415.bam	HG03788	1	ALL	BAM	0.00307	0.00328	781365	10.92	0.5011	0.00011	0.50099	0.00014	10.884	1.0208	ITU.wgs.coriell_phase3_samples.20121126.snps.affy_6.genotypes.vcf.gz	PASS	2013-05-10 12:09:49	/nfs/1000g-archive/vol1/ftp/data/HG03788/alignment/HG03788.mapped.ILLUMINA.bwa.ITU.low_coverage.20130415.bam		HG03788.mapped.ILLUMINA.bwa.ITU.low_coverage.20130415.bam
6697	NA20845.mapped.ILLUMINA.bwa.GIH.low_coverage.20120522.bam	NA20845	1	ALL	BAM	0.00307	0.0027	1368816	6.86	0.50191	0.00017	0.50241	0.00028	6.87	0.9999	GIH.omni_wg_2141_filtered.vcf.gz	PASS	2013-05-17 07:07:10	/nfs/1000g-archive/vol1/ftp/data/NA20845/alignment/NA20845.mapped.ILLUMINA.bwa.GIH.low_coverage.20120522.bam		NA20845.mapped.ILLUMINA.bwa.GIH.low_coverage.20120522.bam
16284	HG02405.mapped.ILLUMINA.bwa.CDX.low_coverage.20130415.bam	HG02405	0	ALL	BAM	0.00307	0.00227	665690	4.89	0.50156	0.00033	0.50124	0.00035	4.876	1.0227	CDX.wgs.coriell_phase3_samples.20121126.snps.affy_6.genotypes.vcf.gz	PASS	2013-04-30 18:52:30	/nfs/1000g-archive/vol1/ftp/data/HG02405/alignment/HG02405.mapped.ILLUMINA.bwa.CDX.low_coverage.20130415.bam		HG02405.mapped.ILLUMINA.bwa.CDX.low_coverage.20130415.bam
16316	HG02168.mapped.ILLUMINA.bwa.CDX.low_coverage.20130415.bam	HG02168	0	ALL	BAM	0.00307	0.00139	665690	4.47	0.50187	0.00019	0.50135	0.00023	4.479	0.999	CDX.wgs.coriell_phase3_samples.20121126.snps.affy_6.genotypes.vcf.gz	PASS	2013-04-30 18:55:02	/nfs/1000g-archive/vol1/ftp/data/HG02168/alignment/HG02168.mapped.ILLUMINA.bwa.CDX.low_coverage.20130415.bam		HG02168.mapped.ILLUMINA.bwa.CDX.low_coverage.20130415.bam
11199	HG03794.mapped.ILLUMINA.bwa.BEB.low_coverage.20121211.bam	HG03794	0	ALL	BAM	0.00307	0	1753219	5.78	0.50193	0.00017	0	0	0	0	ALL.omni_wg_2141_filtered.vcf.gz	PASS	2013-05-17 02:41:35	/nfs/1000g-archive/vol1/ftp/data/HG03794/alignment/HG03794.mapped.ILLUMINA.bwa.BEB.low_coverage.20121211.bam		HG03794.mapped.ILLUMINA.bwa.BEB.low_coverage.20121211.bam
12344	HG02561.mapped.ILLUMINA.bwa.GWD.low_coverage.20121211.bam	HG02561	1	ALL	BAM	0.00306	0.00387	840560	8.01	0.50087	0.00021	0.50164	0.00012	8	1.0212	GWD.wgs.coriell_phase3_samples.20121126.snps.affy_6.genotypes.vcf.gz	PASS	2013-05-16 12:21:24	/nfs/1000g-archive/vol1/ftp/data/HG02561/alignment/HG02561.mapped.ILLUMINA.bwa.GWD.low_coverage.20121211.bam		HG02561.mapped.ILLUMINA.bwa.GWD.low_coverage.20121211.bam
25407	HG03811.mapped.ILLUMINA.bwa.BEB.low_coverage.20130415.bam	HG03811	0	ALL	BAM	0.00306	0.00224	783628	4.12	0.5008	0.00022	0.50014	0.00021	4.136	0.9979	BEB.wgs.coriell_phase3_samples.20121126.snps.affy_6.genotypes.vcf.gz	PASS	2013-05-05 05:58:22	/nfs/1000g-archive/vol1/ftp/data/HG03811/alignment/HG03811.mapped.ILLUMINA.bwa.BEB.low_coverage.20130415.bam		HG03811.mapped.ILLUMINA.bwa.BEB.low_coverage.20130415.bam
46990	HG03679.mapped.ILLUMINA.bwa.STU.low_coverage.20130415.bam	HG03679	1	ALL	BAM	0.00306	0	1753219	10.53	0.50163	0.0002	0	0	0	0	ALL.omni_wg_2141_filtered.vcf.gz	PASS	2013-05-10 14:12:57	/nfs/1000g-archive/vol1/ftp/data/HG03679/alignment/HG03679.mapped.ILLUMINA.bwa.STU.low_coverage.20130415.bam		HG03679.mapped.ILLUMINA.bwa.STU.low_coverage.20130415.bam
59085	HG03084.mapped.ILLUMINA.bwa.MSL.low_coverage.20130415.bam	HG03084	1	ALL	BAM	0.00305	0.00333	838168	9.54	0.50086	0.00012	0.50133	0.00015	9.519	1.0227	MSL.wgs.coriell_phase3_samples.20121126.snps.affy_6.genotypes.vcf.gz	PASS	2013-05-14 03:15:58	/nfs/1000g-archive/vol1/ftp/data/HG03084/alignment/HG03084.mapped.ILLUMINA.bwa.MSL.low_coverage.20130415.bam		HG03084.mapped.ILLUMINA.bwa.MSL.low_coverage.20130415.bam
41861	NA20771.mapped.ILLUMINA.bwa.TSI.low_coverage.20130415.bam	NA20771	1	ALL	BAM	0.00305	0.00313	1402149	5.71	0.50217	0.00036	0.50274	0.00035	5.718	0.9981	TSI.omni_wg_2141_filtered.vcf.gz	PASS	2013-05-10 10:33:18	/nfs/1000g-archive/vol1/ftp/data/NA20771/alignment/NA20771.mapped.ILLUMINA.bwa.TSI.low_coverage.20130415.bam		NA20771.mapped.ILLUMINA.bwa.TSI.low_coverage.20130415.bam
12111	HG02629.mapped.ILLUMINA.bwa.GWD.low_coverage.20121211.bam	HG02629	1	ALL	BAM	0.00305	0	1753219	7.91	0.49992	0.00036	0	0	0	0	ALL.omni_wg_2141_filtered.vcf.gz	PASS	2013-05-17 17:52:21	/nfs/1000g-archive/vol1/ftp/data/HG02629/alignment/HG02629.mapped.ILLUMINA.bwa.GWD.low_coverage.20121211.bam		HG02629.mapped.ILLUMINA.bwa.GWD.low_coverage.20121211.bam
12134	HG03817.mapped.ILLUMINA.bwa.BEB.low_coverage.20121211.bam	HG03817	1	ALL	BAM	0.00304	0.00384	783628	4.89	0.501	0.00012	0.50085	9e-05	4.901	0.9972	BEB.wgs.coriell_phase3_samples.20121126.snps.affy_6.genotypes.vcf.gz	PASS	2013-05-16 13:16:28	/nfs/1000g-archive/vol1/ftp/data/HG03817/alignment/HG03817.mapped.ILLUMINA.bwa.BEB.low_coverage.20121211.bam		HG03817.mapped.ILLUMINA.bwa.BEB.low_coverage.20121211.bam
58142	HG03040.mapped.ILLUMINA.bwa.GWD.low_coverage.20130415.bam	HG03040	1	ALL	BAM	0.00304	0.00307	840560	8.96	0.50052	9e-05	0.50121	0.00012	8.981	0.9979	GWD.wgs.coriell_phase3_samples.20121126.snps.affy_6.genotypes.vcf.gz	PASS	2013-05-14 02:50:08	/nfs/1000g-archive/vol1/ftp/data/HG03040/alignment/HG03040.mapped.ILLUMINA.bwa.GWD.low_coverage.20130415.bam		HG03040.mapped.ILLUMINA.bwa.GWD.low_coverage.20130415.bam
22626	HG03685.mapped.ILLUMINA.bwa.STU.low_coverage.20130415.bam	HG03685	1	ALL	BAM	0.00304	0.003	779732	9.16	0.50052	9e-05	0.5012	0.00013	9.136	1.0205	STU.wgs.coriell_phase3_samples.20121126.snps.affy_6.genotypes.vcf.gz	PASS	2013-05-03 10:51:19	/nfs/1000g-archive/vol1/ftp/data/HG03685/alignment/HG03685.mapped.ILLUMINA.bwa.STU.low_coverage.20130415.bam		HG03685.mapped.ILLUMINA.bwa.STU.low_coverage.20130415.bam
45111	HG03729.mapped.ILLUMINA.bwa.ITU.low_coverage.20130415.bam	HG03729	1	ALL	BAM	0.00304	0	1753219	9.45	0.50124	0.00021	0	0	0	0	ALL.omni_wg_2141_filtered.vcf.gz	PASS	2013-05-10 13:04:41	/nfs/1000g-archive/vol1/ftp/data/HG03729/alignment/HG03729.mapped.ILLUMINA.bwa.ITU.low_coverage.20130415.bam		HG03729.mapped.ILLUMINA.bwa.ITU.low_coverage.20130415.bam
45529	HG03781.mapped.ILLUMINA.bwa.ITU.low_coverage.20130415.bam	HG03781	1	ALL	BAM	0.00304	0	1753219	9.47	0.50124	0.00021	0	0	0	0	ALL.omni_wg_2141_filtered.vcf.gz	PASS	2013-05-10 13:14:06	/nfs/1000g-archive/vol1/ftp/data/HG03781/alignment/HG03781.mapped.ILLUMINA.bwa.ITU.low_coverage.20130415.bam		HG03781.mapped.ILLUMINA.bwa.ITU.low_coverage.20130415.bam
27449	HG03803.mapped.ILLUMINA.bwa.BEB.low_coverage.20130415.bam	HG03803	1	ALL	BAM	0.00304	0	1753219	9.82	0.50158	0.00025	0	0	0	0	ALL.omni_wg_2141_filtered.vcf.gz	PASS	2013-05-05 10:02:01	/nfs/1000g-archive/vol1/ftp/data/HG03803/alignment/HG03803.mapped.ILLUMINA.bwa.BEB.low_coverage.20130415.bam		HG03803.mapped.ILLUMINA.bwa.BEB.low_coverage.20130415.bam
12978	NA18986.mapped.ILLUMINA.bwa.JPT.low_coverage.20120522.bam	NA18986	1	ALL	BAM	0.00304	0	887456	11.3	0.50894	0.00055	0	0	0	0	ALL.wgs.coriell_phase3_samples.20121126.snps.affy_6.genotypes.vcf.gz	PASS	2013-05-16 19:19:56	/nfs/1000g-archive/vol1/ftp/data/NA18986/alignment/NA18986.mapped.ILLUMINA.bwa.JPT.low_coverage.20120522.bam		NA18986.mapped.ILLUMINA.bwa.JPT.low_coverage.20120522.bam
33976	NA19437.mapped.ILLUMINA.bwa.LWK.low_coverage.20130415.bam	NA19437	1	ALL	BAM	0.00304	0	887456	6.33	0.49858	0.00011	0	0	0	0	ALL.wgs.coriell_phase3_samples.20121126.snps.affy_6.genotypes.vcf.gz	PASS	2013-05-08 04:20:23	/nfs/1000g-archive/vol1/ftp/data/NA19437/alignment/NA19437.mapped.ILLUMINA.bwa.LWK.low_coverage.20130415.bam		NA19437.mapped.ILLUMINA.bwa.LWK.low_coverage.20130415.bam
26171	HG04132.mapped.ILLUMINA.bwa.BEB.low_coverage.20130415.bam	HG04132	0	ALL	BAM	0.00303	0.00312	783628	4.65	0.50197	0.00016	0.50185	0.00022	4.654	0.9996	BEB.wgs.coriell_phase3_samples.20121126.snps.affy_6.genotypes.vcf.gz	PASS	2013-05-05 08:01:19	/nfs/1000g-archive/vol1/ftp/data/HG04132/alignment/HG04132.mapped.ILLUMINA.bwa.BEB.low_coverage.20130415.bam		HG04132.mapped.ILLUMINA.bwa.BEB.low_coverage.20130415.bam
34980	NA20527.mapped.ILLUMINA.bwa.TSI.low_coverage.20130415.bam	NA20527	1	ALL	BAM	0.00303	0.00304	1402149	7.92	0.50118	0.00018	0.50175	0.00029	7.93	0.999	TSI.omni_wg_2141_filtered.vcf.gz	PASS	2013-05-08 06:51:05	/nfs/1000g-archive/vol1/ftp/data/NA20527/alignment/NA20527.mapped.ILLUMINA.bwa.TSI.low_coverage.20130415.bam		NA20527.mapped.ILLUMINA.bwa.TSI.low_coverage.20130415.bam
12001	HG03478.mapped.ILLUMINA.bwa.MSL.low_coverage.20121211.bam	HG03478	1	ALL	BAM	0.00303	0	1753219	6.82	0.49889	0.00069	0	0	0	0	ALL.omni_wg_2141_filtered.vcf.gz	PASS	2013-05-16 23:05:17	/nfs/1000g-archive/vol1/ftp/data/HG03478/alignment/HG03478.mapped.ILLUMINA.bwa.MSL.low_coverage.20121211.bam		HG03478.mapped.ILLUMINA.bwa.MSL.low_coverage.20121211.bam
42963	NA20773.mapped.ILLUMINA.bwa.TSI.low_coverage.20130415.bam	NA20773	1	ALL	BAM	0.00302	0.00323	1402149	5.08	0.50275	0.00032	0.50311	0.00047	5.09	0.9994	TSI.omni_wg_2141_filtered.vcf.gz	PASS	2013-05-10 11:20:01	/nfs/1000g-archive/vol1/ftp/data/NA20773/alignment/NA20773.mapped.ILLUMINA.bwa.TSI.low_coverage.20130415.bam		NA20773.mapped.ILLUMINA.bwa.TSI.low_coverage.20130415.bam
36003	NA20512.mapped.ILLUMINA.bwa.TSI.low_coverage.20130415.bam	NA20512	1	ALL	BAM	0.00302	0.00313	1402149	7.24	0.50119	0.00029	0.50218	0.00032	7.255	0.9975	TSI.omni_wg_2141_filtered.vcf.gz	PASS	2013-05-09 02:24:20	/nfs/1000g-archive/vol1/ftp/data/NA20512/alignment/NA20512.mapped.ILLUMINA.bwa.TSI.low_coverage.20130415.bam		NA20512.mapped.ILLUMINA.bwa.TSI.low_coverage.20130415.bam
12294	HG02624.mapped.ILLUMINA.bwa.GWD.low_coverage.20121211.bam	HG02624	1	ALL	BAM	0.00302	0	1753219	9.3	0.49972	0.0003	0	0	0	0	ALL.omni_wg_2141_filtered.vcf.gz	PASS	2013-05-16 22:09:13	/nfs/1000g-archive/vol1/ftp/data/HG02624/alignment/HG02624.mapped.ILLUMINA.bwa.GWD.low_coverage.20121211.bam		HG02624.mapped.ILLUMINA.bwa.GWD.low_coverage.20121211.bam
62885	HG02676.mapped.ILLUMINA.bwa.GWD.low_coverage.20130415.bam	HG02676	1	ALL	BAM	0.00302	0	1753219	9.47	0.49961	0.00031	0	0	0	0	ALL.omni_wg_2141_filtered.vcf.gz	PASS	2013-05-14 06:39:18	/nfs/1000g-archive/vol1/ftp/data/HG02676/alignment/HG02676.mapped.ILLUMINA.bwa.GWD.low_coverage.20130415.bam		HG02676.mapped.ILLUMINA.bwa.GWD.low_coverage.20130415.bam
8850	HG00160.mapped.ILLUMINA.bwa.GBR.low_coverage.20120522.bam	HG00160	1	ALL	BAM	0.00301	0.00323	1389642	5.1	0.50193	0.00048	0.50195	0.00049	5.111	0.9938	GBR.omni_wg_2141_filtered.vcf.gz	PASS	2013-05-16 15:31:03	/nfs/1000g-archive/vol1/ftp/data/HG00160/alignment/HG00160.mapped.ILLUMINA.bwa.GBR.low_coverage.20120522.bam		HG00160.mapped.ILLUMINA.bwa.GBR.low_coverage.20120522.bam
63362	HG02944.mapped.ILLUMINA.bwa.ESN.low_coverage.20130415.bam	HG02944	1	ALL	BAM	0.00301	0	1753219	8.95	0.49965	0.00044	0	0	0	0	ALL.omni_wg_2141_filtered.vcf.gz	PASS	2013-05-14 07:10:40	/nfs/1000g-archive/vol1/ftp/data/HG02944/alignment/HG02944.mapped.ILLUMINA.bwa.ESN.low_coverage.20130415.bam		HG02944.mapped.ILLUMINA.bwa.ESN.low_coverage.20130415.bam
32037	NA20362.mapped.ILLUMINA.bwa.ASW.low_coverage.20130415.bam	NA20362	1	ALL	BAM	0.00301	0	718973	6.31	0.49984	5e-05	0	0	0	0	ASW.wgs.coriell_phase3_samples.20121126.snps.affy_6.genotypes.vcf.gz	PASS	2013-05-08 01:41:33	/nfs/1000g-archive/vol1/ftp/data/NA20362/alignment/NA20362.mapped.ILLUMINA.bwa.ASW.low_coverage.20130415.bam		NA20362.mapped.ILLUMINA.bwa.ASW.low_coverage.20130415.bam
41013	HG03800.mapped.ILLUMINA.bwa.BEB.low_coverage.20130415.bam	HG03800	1	ALL	BAM	0.003	0.00317	783628	9.32	0.5027	0.00025	0.50241	0.00024	9.301	1.0211	BEB.wgs.coriell_phase3_samples.20121126.snps.affy_6.genotypes.vcf.gz	PASS	2013-05-10 09:47:17	/nfs/1000g-archive/vol1/ftp/data/HG03800/alignment/HG03800.mapped.ILLUMINA.bwa.BEB.low_coverage.20130415.bam		HG03800.mapped.ILLUMINA.bwa.BEB.low_coverage.20130415.bam
64696	HG00731.mapped.ILLUMINA.bwa.PUR.low_coverage.20130422.bam	HG00731	1	ALL	BAM	0.003	0.00305	1558284	19.02	0.50101	0.00019	0.50215	0.00021	19.036	0.999	PUR.omni_wg_2141_filtered.vcf.gz	PASS	2013-05-14 11:14:43	/nfs/1000g-archive/vol1/ftp/data/HG00731/alignment/HG00731.mapped.ILLUMINA.bwa.PUR.low_coverage.20130422.bam		HG00731.mapped.ILLUMINA.bwa.PUR.low_coverage.20130422.bam
50133	NA12778.mapped.ILLUMINA.bwa.CEU.low_coverage.20130415.bam	NA12778	1	ALL	BAM	0.003	0.00293	1400785	7.42	0.50154	0.00016	0.50175	0.00028	7.43	0.9991	CEU.omni_wg_2141_filtered.vcf.gz	PASS	2013-05-10 22:45:59	/nfs/1000g-archive/vol1/ftp/data/NA12778/alignment/NA12778.mapped.ILLUMINA.bwa.CEU.low_coverage.20130415.bam		NA12778.mapped.ILLUMINA.bwa.CEU.low_coverage.20130415.bam
17145	HG02008.mapped.ILLUMINA.bwa.PEL.low_coverage.20130415.bam	HG02008	1	ALL	BAM	0.003	0.00258	1304517	6.51	0.50168	0.00015	0.50237	0.00036	6.522	0.9962	PEL.omni_wg_2141_filtered.vcf.gz	PASS	2013-04-30 20:09:22	/nfs/1000g-archive/vol1/ftp/data/HG02008/alignment/HG02008.mapped.ILLUMINA.bwa.PEL.low_coverage.20130415.bam		HG02008.mapped.ILLUMINA.bwa.PEL.low_coverage.20130415.bam
9538	NA19900.mapped.ILLUMINA.bwa.ASW.low_coverage.20120522.bam	NA19900	1	ALL	BAM	0.00299	0.00339	1675632	10.61	0.50244	0.00022	0.50261	0.00033	10.591	1.0066	ASW.omni_wg_2141_filtered.vcf.gz	PASS	2013-05-16 23:05:43	/nfs/1000g-archive/vol1/ftp/data/NA19900/alignment/NA19900.mapped.ILLUMINA.bwa.ASW.low_coverage.20120522.bam		NA19900.mapped.ILLUMINA.bwa.ASW.low_coverage.20120522.bam
12747	HG04159.mapped.ILLUMINA.bwa.BEB.low_coverage.20121211.bam	HG04159	1	ALL	BAM	0.00299	0.00308	783628	5.83	0.5008	0.00013	0.50084	9e-05	5.841	0.9981	BEB.wgs.coriell_phase3_samples.20121126.snps.affy_6.genotypes.vcf.gz	PASS	2013-05-16 16:41:35	/nfs/1000g-archive/vol1/ftp/data/HG04159/alignment/HG04159.mapped.ILLUMINA.bwa.BEB.low_coverage.20121211.bam		HG04159.mapped.ILLUMINA.bwa.BEB.low_coverage.20121211.bam
32132	NA19240.mapped.ILLUMINA.bwa.YRI.low_coverage.20130415.bam	NA19240	0	ALL	BAM	0.00299	0.00086	1559108	3.67	0.50129	0.0006	0.5021	0.00071	3.671	0.9981	YRI.omni_wg_2141_filtered.vcf.gz	PASS	2013-05-08 01:59:29	/nfs/1000g-archive/vol1/ftp/data/NA19240/alignment/NA19240.mapped.ILLUMINA.bwa.YRI.low_coverage.20130415.bam		NA19240.mapped.ILLUMINA.bwa.YRI.low_coverage.20130415.bam
60848	HG02757.mapped.ILLUMINA.bwa.GWD.low_coverage.20130415.bam	HG02757	1	ALL	BAM	0.00299	0	1753219	8.13	0.4993	0.0004	0	0	0	0	ALL.omni_wg_2141_filtered.vcf.gz	PASS	2013-05-14 04:34:18	/nfs/1000g-archive/vol1/ftp/data/HG02757/alignment/HG02757.mapped.ILLUMINA.bwa.GWD.low_coverage.20130415.bam		HG02757.mapped.ILLUMINA.bwa.GWD.low_coverage.20130415.bam
9165	NA19819.mapped.ILLUMINA.bwa.ASW.low_coverage.20120522.bam	NA19819	1	ALL	BAM	0.00299	0	718973	9.68	0.505	0.00141	0	0	0	0	ASW.wgs.coriell_phase3_samples.20121126.snps.affy_6.genotypes.vcf.gz	PASS	2013-05-16 11:09:43	/nfs/1000g-archive/vol1/ftp/data/NA19819/alignment/NA19819.mapped.ILLUMINA.bwa.ASW.low_coverage.20120522.bam		NA19819.mapped.ILLUMINA.bwa.ASW.low_coverage.20120522.bam
22178	HG03680.mapped.ILLUMINA.bwa.STU.low_coverage.20130415.bam	HG03680	1	ALL	BAM	0.00298	0.00312	779732	9.49	0.50071	0.00018	0.50147	0.00016	9.46	1.0212	STU.wgs.coriell_phase3_samples.20121126.snps.affy_6.genotypes.vcf.gz	PASS	2013-05-03 09:58:37	/nfs/1000g-archive/vol1/ftp/data/HG03680/alignment/HG03680.mapped.ILLUMINA.bwa.STU.low_coverage.20130415.bam		HG03680.mapped.ILLUMINA.bwa.STU.low_coverage.20130415.bam
10216	HG01939.mapped.ILLUMINA.bwa.PEL.low_coverage.20120522.bam	HG01939	1	ALL	BAM	0.00298	0.00273	1304517	8.25	0.50216	0.00029	0.50233	0.00039	8.265	1.0007	PEL.omni_wg_2141_filtered.vcf.gz	PASS	2013-05-17 02:37:56	/nfs/1000g-archive/vol1/ftp/data/HG01939/alignment/HG01939.mapped.ILLUMINA.bwa.PEL.low_coverage.20120522.bam		HG01939.mapped.ILLUMINA.bwa.PEL.low_coverage.20120522.bam
22838	HG03681.mapped.ILLUMINA.bwa.STU.low_coverage.20130415.bam	HG03681	1	ALL	BAM	0.00298	0	1753219	9.79	0.50203	0.00021	0	0	0	0	ALL.omni_wg_2141_filtered.vcf.gz	PASS	2013-05-03 11:33:09	/nfs/1000g-archive/vol1/ftp/data/HG03681/alignment/HG03681.mapped.ILLUMINA.bwa.STU.low_coverage.20130415.bam		HG03681.mapped.ILLUMINA.bwa.STU.low_coverage.20130415.bam
12756	HG02604.mapped.ILLUMINA.bwa.PJL.low_coverage.20121211.bam	HG02604	1	ALL	BAM	0.00297	0.0043	781539	7.89	0.4995	0.0003	0.50011	0.0003	7.902	0.9966	PJL.wgs.coriell_phase3_samples.20121126.snps.affy_6.genotypes.vcf.gz	PASS	2013-05-16 12:11:54	/nfs/1000g-archive/vol1/ftp/data/HG02604/alignment/HG02604.mapped.ILLUMINA.bwa.PJL.low_coverage.20121211.bam		HG02604.mapped.ILLUMINA.bwa.PJL.low_coverage.20121211.bam
12224	HG03458.mapped.ILLUMINA.bwa.MSL.low_coverage.20121211.bam	HG03458	1	ALL	BAM	0.00297	0.00331	838168	8.56	0.50002	0.00012	0.50131	6e-05	8.577	0.9983	MSL.wgs.coriell_phase3_samples.20121126.snps.affy_6.genotypes.vcf.gz	PASS	2013-05-16 06:28:39	/nfs/1000g-archive/vol1/ftp/data/HG03458/alignment/HG03458.mapped.ILLUMINA.bwa.MSL.low_coverage.20121211.bam		HG03458.mapped.ILLUMINA.bwa.MSL.low_coverage.20121211.bam
9971	HG00188.mapped.ILLUMINA.bwa.FIN.low_coverage.20121211.bam	HG00188	1	ALL	BAM	0.00297	0	712928	7.11	0.5015	0.00051	0	0	0	0	FIN.wgs.coriell_phase3_samples.20121126.snps.affy_6.genotypes.vcf.gz	PASS	2013-05-16 12:06:50	/nfs/1000g-archive/vol1/ftp/data/HG00188/alignment/HG00188.mapped.ILLUMINA.bwa.FIN.low_coverage.20121211.bam		HG00188.mapped.ILLUMINA.bwa.FIN.low_coverage.20121211.bam
28056	HG03900.mapped.ILLUMINA.bwa.STU.low_coverage.20130415.bam	HG03900	1	ALL	BAM	0.00296	0.00323	779732	9.65	0.50024	7e-05	0.50091	0.00012	9.624	1.0219	STU.wgs.coriell_phase3_samples.20121126.snps.affy_6.genotypes.vcf.gz	PASS	2013-05-05 11:17:29	/nfs/1000g-archive/vol1/ftp/data/HG03900/alignment/HG03900.mapped.ILLUMINA.bwa.STU.low_coverage.20130415.bam		HG03900.mapped.ILLUMINA.bwa.STU.low_coverage.20130415.bam
12449	HG03039.mapped.ILLUMINA.bwa.GWD.low_coverage.20121211.bam	HG03039	1	ALL	BAM	0.00296	0	1753219	9.41	0.5001	0.00031	0	0	0	0	ALL.omni_wg_2141_filtered.vcf.gz	PASS	2013-05-17 15:05:51	/nfs/1000g-archive/vol1/ftp/data/HG03039/alignment/HG03039.mapped.ILLUMINA.bwa.GWD.low_coverage.20121211.bam		HG03039.mapped.ILLUMINA.bwa.GWD.low_coverage.20121211.bam
12841	NA19024.mapped.ILLUMINA.bwa.LWK.low_coverage.20121211.bam	NA19024	1	ALL	BAM	0.00296	0	887456	9.96	0.50052	7e-05	0	0	0	0	ALL.wgs.coriell_phase3_samples.20121126.snps.affy_6.genotypes.vcf.gz	PASS	2013-05-16 17:51:47	/nfs/1000g-archive/vol1/ftp/data/NA19024/alignment/NA19024.mapped.ILLUMINA.bwa.LWK.low_coverage.20121211.bam		NA19024.mapped.ILLUMINA.bwa.LWK.low_coverage.20121211.bam
39631	NA21133.mapped.ILLUMINA.bwa.GIH.low_coverage.20130415.bam	NA21133	1	ALL	BAM	0.00296	0	887456	8.21	0.502	0.00011	0	0	0	0	ALL.wgs.coriell_phase3_samples.20121126.snps.affy_6.genotypes.vcf.gz	PASS	2013-05-10 07:10:26	/nfs/1000g-archive/vol1/ftp/data/NA21133/alignment/NA21133.mapped.ILLUMINA.bwa.GIH.low_coverage.20130415.bam		NA21133.mapped.ILLUMINA.bwa.GIH.low_coverage.20130415.bam
16690	HG00458.mapped.ILLUMINA.bwa.CHS.low_coverage.20130415.bam	HG00458	1	ALL	BAM	0.00295	0.00305	1243376	8.91	0.50013	0.00012	0.50192	0.00018	8.919	1.0004	CHS.omni_wg_2141_filtered.vcf.gz	PASS	2013-04-30 19:21:08	/nfs/1000g-archive/vol1/ftp/data/HG00458/alignment/HG00458.mapped.ILLUMINA.bwa.CHS.low_coverage.20130415.bam		HG00458.mapped.ILLUMINA.bwa.CHS.low_coverage.20130415.bam
64497	HG03124.mapped.ILLUMINA.bwa.ESN.low_coverage.20130415.bam	HG03124	1	ALL	BAM	0.00295	0	1753219	9.16	0.50014	0.00034	0	0	0	0	ALL.omni_wg_2141_filtered.vcf.gz	PASS	2013-05-14 09:05:30	/nfs/1000g-archive/vol1/ftp/data/HG03124/alignment/HG03124.mapped.ILLUMINA.bwa.ESN.low_coverage.20130415.bam		HG03124.mapped.ILLUMINA.bwa.ESN.low_coverage.20130415.bam
45058	HG03862.mapped.ILLUMINA.bwa.ITU.low_coverage.20130415.bam	HG03862	1	ALL	BAM	0.00295	0	1753219	10.5	0.50114	0.00021	0	0	0	0	ALL.omni_wg_2141_filtered.vcf.gz	PASS	2013-05-10 13:03:01	/nfs/1000g-archive/vol1/ftp/data/HG03862/alignment/HG03862.mapped.ILLUMINA.bwa.ITU.low_coverage.20130415.bam		HG03862.mapped.ILLUMINA.bwa.ITU.low_coverage.20130415.bam
27217	HG04188.mapped.ILLUMINA.bwa.BEB.low_coverage.20130415.bam	HG04188	1	ALL	BAM	0.00295	0	1753219	8.18	0.50022	0.0001	0	0	0	0	ALL.omni_wg_2141_filtered.vcf.gz	PASS	2013-05-05 09:10:13	/nfs/1000g-archive/vol1/ftp/data/HG04188/alignment/HG04188.mapped.ILLUMINA.bwa.BEB.low_coverage.20130415.bam		HG04188.mapped.ILLUMINA.bwa.BEB.low_coverage.20130415.bam
13078	HG02490.mapped.ILLUMINA.bwa.PJL.low_coverage.20121211.bam	HG02490	1	ALL	BAM	0.00294	0.00346	781539	10.34	0.50109	0.00042	0.50055	0.00036	10.307	1.0211	PJL.wgs.coriell_phase3_samples.20121126.snps.affy_6.genotypes.vcf.gz	PASS	2013-05-16 18:59:33	/nfs/1000g-archive/vol1/ftp/data/HG02490/alignment/HG02490.mapped.ILLUMINA.bwa.PJL.low_coverage.20121211.bam		HG02490.mapped.ILLUMINA.bwa.PJL.low_coverage.20121211.bam
12921	HG03606.mapped.ILLUMINA.bwa.BEB.low_coverage.20121211.bam	HG03606	0	ALL	BAM	0.00294	0.00325	783628	7.41	0.50191	0.00013	0.50143	0.00017	7.383	1.0222	BEB.wgs.coriell_phase3_samples.20121126.snps.affy_6.genotypes.vcf.gz	PASS	2013-05-16 09:48:04	/nfs/1000g-archive/vol1/ftp/data/HG03606/alignment/HG03606.mapped.ILLUMINA.bwa.BEB.low_coverage.20121211.bam		HG03606.mapped.ILLUMINA.bwa.BEB.low_coverage.20121211.bam
12487	HG03572.mapped.ILLUMINA.bwa.MSL.low_coverage.20121211.bam	HG03572	1	ALL	BAM	0.00294	0.00302	838168	6.15	0.50048	3e-05	0.50118	0.00012	6.158	0.9987	MSL.wgs.coriell_phase3_samples.20121126.snps.affy_6.genotypes.vcf.gz	PASS	2013-05-16 13:03:58	/nfs/1000g-archive/vol1/ftp/data/HG03572/alignment/HG03572.mapped.ILLUMINA.bwa.MSL.low_coverage.20121211.bam		HG03572.mapped.ILLUMINA.bwa.MSL.low_coverage.20121211.bam
16708	HG01997.mapped.ILLUMINA.bwa.PEL.low_coverage.20130415.bam	HG01997	1	ALL	BAM	0.00294	0.00299	1304517	5.56	0.50214	0.00023	0.50211	0.00054	5.569	0.9966	PEL.omni_wg_2141_filtered.vcf.gz	PASS	2013-04-30 19:22:44	/nfs/1000g-archive/vol1/ftp/data/HG01997/alignment/HG01997.mapped.ILLUMINA.bwa.PEL.low_coverage.20130415.bam		HG01997.mapped.ILLUMINA.bwa.PEL.low_coverage.20130415.bam
9194	HG01879.mapped.ILLUMINA.bwa.ACB.low_coverage.20120522.bam	HG01879	1	ALL	BAM	0.00294	0.00261	1597764	4.43	0.50285	0.00043	0.50228	0.00035	4.429	1.0009	ACB.omni_wg_2141_filtered.vcf.gz	PASS	2013-05-16 12:09:48	/nfs/1000g-archive/vol1/ftp/data/HG01879/alignment/HG01879.mapped.ILLUMINA.bwa.ACB.low_coverage.20120522.bam		HG01879.mapped.ILLUMINA.bwa.ACB.low_coverage.20120522.bam
33752	NA20530.mapped.ILLUMINA.bwa.TSI.low_coverage.20130415.bam	NA20530	1	ALL	BAM	0.00294	0	887456	7.84	0.50249	0.00028	0	0	0	0	ALL.wgs.coriell_phase3_samples.20121126.snps.affy_6.genotypes.vcf.gz	PASS	2013-05-08 04:06:24	/nfs/1000g-archive/vol1/ftp/data/NA20530/alignment/NA20530.mapped.ILLUMINA.bwa.TSI.low_coverage.20130415.bam		NA20530.mapped.ILLUMINA.bwa.TSI.low_coverage.20130415.bam
42566	HG03869.mapped.ILLUMINA.bwa.ITU.low_coverage.20130415.bam	HG03869	1	ALL	BAM	0.00293	0.00321	781365	9.71	0.50067	0.00018	0.50084	0.00016	9.687	1.0209	ITU.wgs.coriell_phase3_samples.20121126.snps.affy_6.genotypes.vcf.gz	PASS	2013-05-10 11:07:52	/nfs/1000g-archive/vol1/ftp/data/HG03869/alignment/HG03869.mapped.ILLUMINA.bwa.ITU.low_coverage.20130415.bam		HG03869.mapped.ILLUMINA.bwa.ITU.low_coverage.20130415.bam
45841	HG03731.mapped.ILLUMINA.bwa.ITU.low_coverage.20130415.bam	HG03731	1	ALL	BAM	0.00293	0	1753219	9.67	0.50263	0.0003	0	0	0	0	ALL.omni_wg_2141_filtered.vcf.gz	PASS	2013-05-10 13:30:14	/nfs/1000g-archive/vol1/ftp/data/HG03731/alignment/HG03731.mapped.ILLUMINA.bwa.ITU.low_coverage.20130415.bam		HG03731.mapped.ILLUMINA.bwa.ITU.low_coverage.20130415.bam
25722	HG04211.mapped.ILLUMINA.bwa.ITU.low_coverage.20130415.bam	HG04211	1	ALL	BAM	0.00292	0.00548	781365	7.05	0.49926	6e-05	0.50166	8e-05	7.03	1.0216	ITU.wgs.coriell_phase3_samples.20121126.snps.affy_6.genotypes.vcf.gz	PASS	2013-05-05 06:20:21	/nfs/1000g-archive/vol1/ftp/data/HG04211/alignment/HG04211.mapped.ILLUMINA.bwa.ITU.low_coverage.20130415.bam		HG04211.mapped.ILLUMINA.bwa.ITU.low_coverage.20130415.bam
60500	HG03451.mapped.ILLUMINA.bwa.MSL.low_coverage.20130415.bam	HG03451	1	ALL	BAM	0.00292	0	1753219	10.32	0.50012	0.0003	0	0	0	0	ALL.omni_wg_2141_filtered.vcf.gz	PASS	2013-05-14 04:25:37	/nfs/1000g-archive/vol1/ftp/data/HG03451/alignment/HG03451.mapped.ILLUMINA.bwa.MSL.low_coverage.20130415.bam		HG03451.mapped.ILLUMINA.bwa.MSL.low_coverage.20130415.bam
12101	NA18538.mapped.ILLUMINA.bwa.CHB.low_coverage.20120522.bam	NA18538	1	ALL	BAM	0.00292	0	887456	6.08	0.5011	0.00024	0	0	0	0	ALL.wgs.coriell_phase3_samples.20121126.snps.affy_6.genotypes.vcf.gz	PASS	2013-05-16 10:06:11	/nfs/1000g-archive/vol1/ftp/data/NA18538/alignment/NA18538.mapped.ILLUMINA.bwa.CHB.low_coverage.20120522.bam		NA18538.mapped.ILLUMINA.bwa.CHB.low_coverage.20120522.bam
42882	HG03713.mapped.ILLUMINA.bwa.ITU.low_coverage.20130415.bam	HG03713	1	ALL	BAM	0.00291	0.00303	781365	10.47	0.50086	0.0001	0.50128	0.0001	10.433	1.0202	ITU.wgs.coriell_phase3_samples.20121126.snps.affy_6.genotypes.vcf.gz	PASS	2013-05-10 11:17:53	/nfs/1000g-archive/vol1/ftp/data/HG03713/alignment/HG03713.mapped.ILLUMINA.bwa.ITU.low_coverage.20130415.bam		HG03713.mapped.ILLUMINA.bwa.ITU.low_coverage.20130415.bam
40164	NA20864.mapped.ILLUMINA.bwa.GIH.low_coverage.20130415.bam	NA20864	1	ALL	BAM	0.00291	0.00301	1368816	8.12	0.50117	0.00026	0.50108	0.00024	8.131	1.0005	GIH.omni_wg_2141_filtered.vcf.gz	PASS	2013-05-10 08:22:01	/nfs/1000g-archive/vol1/ftp/data/NA20864/alignment/NA20864.mapped.ILLUMINA.bwa.GIH.low_coverage.20130415.bam		NA20864.mapped.ILLUMINA.bwa.GIH.low_coverage.20130415.bam
10620	HG01183.mapped.ILLUMINA.bwa.PUR.low_coverage.20120522.bam	HG01183	1	ALL	BAM	0.0029	0.00322	1558284	5.07	0.50215	0.00038	0.50307	0.00047	5.088	0.9937	PUR.omni_wg_2141_filtered.vcf.gz	PASS	2013-05-16 10:03:54	/nfs/1000g-archive/vol1/ftp/data/HG01183/alignment/HG01183.mapped.ILLUMINA.bwa.PUR.low_coverage.20120522.bam		HG01183.mapped.ILLUMINA.bwa.PUR.low_coverage.20120522.bam
22114	HG03693.mapped.ILLUMINA.bwa.STU.low_coverage.20130415.bam	HG03693	1	ALL	BAM	0.0029	0.00312	779732	9.31	0.49936	8e-05	0.50046	0.00013	9.283	1.0202	STU.wgs.coriell_phase3_samples.20121126.snps.affy_6.genotypes.vcf.gz	PASS	2013-05-03 09:45:28	/nfs/1000g-archive/vol1/ftp/data/HG03693/alignment/HG03693.mapped.ILLUMINA.bwa.STU.low_coverage.20130415.bam		HG03693.mapped.ILLUMINA.bwa.STU.low_coverage.20130415.bam
8438	HG02337.mapped.ILLUMINA.bwa.ACB.low_coverage.20120522.bam	HG02337	1	ALL	BAM	0.0029	0	849391	5.96	0.50311	0.00088	0	0	0	0	ACB.wgs.coriell_phase3_samples.20121126.snps.affy_6.genotypes.vcf.gz	PASS	2013-05-16 18:05:41	/nfs/1000g-archive/vol1/ftp/data/HG02337/alignment/HG02337.mapped.ILLUMINA.bwa.ACB.low_coverage.20120522.bam		HG02337.mapped.ILLUMINA.bwa.ACB.low_coverage.20120522.bam
11537	HG02645.mapped.ILLUMINA.bwa.GWD.low_coverage.20121211.bam	HG02645	1	ALL	BAM	0.0029	0	1753219	9.33	0.50048	0.00029	0	0	0	0	ALL.omni_wg_2141_filtered.vcf.gz	PASS	2013-05-17 17:23:21	/nfs/1000g-archive/vol1/ftp/data/HG02645/alignment/HG02645.mapped.ILLUMINA.bwa.GWD.low_coverage.20121211.bam		HG02645.mapped.ILLUMINA.bwa.GWD.low_coverage.20121211.bam
9183	NA12275.mapped.ILLUMINA.bwa.CEU.low_coverage.20120522.bam	NA12275	1	ALL	BAM	0.00289	0.00334	1400785	4.93	0.50414	0.00069	0.50453	0.00083	4.95	0.9933	CEU.omni_wg_2141_filtered.vcf.gz	PASS	2013-05-17 08:34:19	/nfs/1000g-archive/vol1/ftp/data/NA12275/alignment/NA12275.mapped.ILLUMINA.bwa.CEU.low_coverage.20120522.bam		NA12275.mapped.ILLUMINA.bwa.CEU.low_coverage.20120522.bam
8491	NA19471.mapped.ILLUMINA.bwa.LWK.low_coverage.20120522.bam	NA19471	1	ALL	BAM	0.00289	0.00332	1570264	7.24	0.50315	0.00028	0.50458	0.00047	7.276	0.9946	LWK.omni_wg_2141_filtered.vcf.gz	PASS	2013-05-17 06:48:21	/nfs/1000g-archive/vol1/ftp/data/NA19471/alignment/NA19471.mapped.ILLUMINA.bwa.LWK.low_coverage.20120522.bam		NA19471.mapped.ILLUMINA.bwa.LWK.low_coverage.20120522.bam
40897	NA21095.mapped.ILLUMINA.bwa.GIH.low_coverage.20130415.bam	NA21095	1	ALL	BAM	0.00289	0.00331	1368816	9.11	0.50192	0.00041	0.50228	0.0005	9.143	0.9952	GIH.omni_wg_2141_filtered.vcf.gz	PASS	2013-05-10 09:33:37	/nfs/1000g-archive/vol1/ftp/data/NA21095/alignment/NA21095.mapped.ILLUMINA.bwa.GIH.low_coverage.20130415.bam		NA21095.mapped.ILLUMINA.bwa.GIH.low_coverage.20130415.bam
16713	HG00359.mapped.ILLUMINA.bwa.FIN.low_coverage.20130415.bam	HG00359	0	ALL	BAM	0.00289	0.00283	1385013	6.71	0.50086	0.00018	0.50199	0.00028	6.717	0.998	FIN.omni_wg_2141_filtered.vcf.gz	PASS	2013-04-30 19:23:28	/nfs/1000g-archive/vol1/ftp/data/HG00359/alignment/HG00359.mapped.ILLUMINA.bwa.FIN.low_coverage.20130415.bam		HG00359.mapped.ILLUMINA.bwa.FIN.low_coverage.20130415.bam
12593	HG02477.mapped.ILLUMINA.bwa.ACB.low_coverage.20121211.bam	HG02477	1	ALL	BAM	0.00289	0	1597764	7.06	0.50137	0.00017	0	0	0	0	ACB.omni_wg_2141_filtered.vcf.gz	PASS	2013-05-17 06:18:50	/nfs/1000g-archive/vol1/ftp/data/HG02477/alignment/HG02477.mapped.ILLUMINA.bwa.ACB.low_coverage.20121211.bam		HG02477.mapped.ILLUMINA.bwa.ACB.low_coverage.20121211.bam
12589	HG02722.mapped.ILLUMINA.bwa.GWD.low_coverage.20121211.bam	HG02722	1	ALL	BAM	0.00289	0	1753219	9.68	0.50079	0.00032	0	0	0	0	ALL.omni_wg_2141_filtered.vcf.gz	PASS	2013-05-17 05:52:35	/nfs/1000g-archive/vol1/ftp/data/HG02722/alignment/HG02722.mapped.ILLUMINA.bwa.GWD.low_coverage.20121211.bam		HG02722.mapped.ILLUMINA.bwa.GWD.low_coverage.20121211.bam
45894	HG03717.mapped.ILLUMINA.bwa.ITU.low_coverage.20130415.bam	HG03717	1	ALL	BAM	0.00289	0	1753219	8.1	0.5014	0.0001	0	0	0	0	ALL.omni_wg_2141_filtered.vcf.gz	PASS	2013-05-10 13:30:20	/nfs/1000g-archive/vol1/ftp/data/HG03717/alignment/HG03717.mapped.ILLUMINA.bwa.ITU.low_coverage.20130415.bam		HG03717.mapped.ILLUMINA.bwa.ITU.low_coverage.20130415.bam
12802	HG04146.mapped.ILLUMINA.bwa.BEB.low_coverage.20121211.bam	HG04146	1	ALL	BAM	0.00288	0.00349	783628	5.77	0.49987	3e-05	0.50048	1e-05	5.755	1.0225	BEB.wgs.coriell_phase3_samples.20121126.snps.affy_6.genotypes.vcf.gz	PASS	2013-05-16 12:09:59	/nfs/1000g-archive/vol1/ftp/data/HG04146/alignment/HG04146.mapped.ILLUMINA.bwa.BEB.low_coverage.20121211.bam		HG04146.mapped.ILLUMINA.bwa.BEB.low_coverage.20121211.bam
7839	HG02394.mapped.ILLUMINA.bwa.CDX.low_coverage.20120522.bam	HG02394	1	ALL	BAM	0.00288	0.00313	1235978	6.21	0.50135	0.00029	0.50114	0.0003	6.214	1.0023	CDX.omni_wg_2141_filtered.vcf.gz	PASS	2013-05-17 06:55:13	/nfs/1000g-archive/vol1/ftp/data/HG02394/alignment/HG02394.mapped.ILLUMINA.bwa.CDX.low_coverage.20120522.bam		HG02394.mapped.ILLUMINA.bwa.CDX.low_coverage.20120522.bam
42829	HG03864.mapped.ILLUMINA.bwa.ITU.low_coverage.20130415.bam	HG03864	1	ALL	BAM	0.00288	0.0031	781365	11.94	0.50133	0.00013	0.50087	0.00015	11.912	1.0203	ITU.wgs.coriell_phase3_samples.20121126.snps.affy_6.genotypes.vcf.gz	PASS	2013-05-10 11:17:39	/nfs/1000g-archive/vol1/ftp/data/HG03864/alignment/HG03864.mapped.ILLUMINA.bwa.ITU.low_coverage.20130415.bam		HG03864.mapped.ILLUMINA.bwa.ITU.low_coverage.20130415.bam
50281	NA18945.mapped.ILLUMINA.bwa.JPT.low_coverage.20130415.bam	NA18945	1	ALL	BAM	0.00288	0.00291	1243522	6.93	0.50189	0.00046	0.50227	0.00058	6.949	0.9976	JPT.omni_wg_2141_filtered.vcf.gz	PASS	2013-05-10 22:56:52	/nfs/1000g-archive/vol1/ftp/data/NA18945/alignment/NA18945.mapped.ILLUMINA.bwa.JPT.low_coverage.20130415.bam		NA18945.mapped.ILLUMINA.bwa.JPT.low_coverage.20130415.bam
15134	HG02218.mapped.ILLUMINA.bwa.IBS.low_coverage.20130415.bam	HG02218	0	ALL	BAM	0.00288	0.00128	753862	4.33	0.50127	0.00031	0.50142	0.00034	4.343	0.9975	IBS.wgs.coriell_phase3_samples.20121126.snps.affy_6.genotypes.vcf.gz	PASS	2013-04-30 17:30:12	/nfs/1000g-archive/vol1/ftp/data/HG02218/alignment/HG02218.mapped.ILLUMINA.bwa.IBS.low_coverage.20130415.bam		HG02218.mapped.ILLUMINA.bwa.IBS.low_coverage.20130415.bam
39767	HG02700.mapped.ILLUMINA.bwa.PJL.low_coverage.20130415.bam	HG02700	1	ALL	BAM	0.00287	0.00277	781539	7.94	0.50017	5e-05	0.50092	8e-05	7.953	0.9978	PJL.wgs.coriell_phase3_samples.20121126.snps.affy_6.genotypes.vcf.gz	PASS	2013-05-10 07:51:02	/nfs/1000g-archive/vol1/ftp/data/HG02700/alignment/HG02700.mapped.ILLUMINA.bwa.PJL.low_coverage.20130415.bam		HG02700.mapped.ILLUMINA.bwa.PJL.low_coverage.20130415.bam
10679	HG01204.mapped.ILLUMINA.bwa.PUR.low_coverage.20120522.bam	HG01204	1	ALL	BAM	0.00287	0	854341	5.4	0.50172	0.00033	0	0	0	0	PUR.wgs.coriell_phase3_samples.20121126.snps.affy_6.genotypes.vcf.gz	PASS	2013-05-16 15:44:59	/nfs/1000g-archive/vol1/ftp/data/HG01204/alignment/HG01204.mapped.ILLUMINA.bwa.PUR.low_coverage.20120522.bam		HG01204.mapped.ILLUMINA.bwa.PUR.low_coverage.20120522.bam
11878	HG02604.mapped.ILLUMINA.bwa.PJL.low_coverage.20121211.bam	HG02604	1	ALL	BAM	0.00287	0	1753219	7.67	0.5021	0.00016	0	0	0	0	ALL.omni_wg_2141_filtered.vcf.gz	PASS	2013-05-16 19:25:03	/nfs/1000g-archive/vol1/ftp/data/HG02604/alignment/HG02604.mapped.ILLUMINA.bwa.PJL.low_coverage.20121211.bam		HG02604.mapped.ILLUMINA.bwa.PJL.low_coverage.20121211.bam
63238	HG02643.mapped.ILLUMINA.bwa.GWD.low_coverage.20130415.bam	HG02643	1	ALL	BAM	0.00287	0	1753219	7.93	0.50014	0.00033	0	0	0	0	ALL.omni_wg_2141_filtered.vcf.gz	PASS	2013-05-14 07:05:20	/nfs/1000g-archive/vol1/ftp/data/HG02643/alignment/HG02643.mapped.ILLUMINA.bwa.GWD.low_coverage.20130415.bam		HG02643.mapped.ILLUMINA.bwa.GWD.low_coverage.20130415.bam
17444	HG02052.mapped.ILLUMINA.bwa.ACB.low_coverage.20130415.bam	HG02052	1	ALL	BAM	0.00286	0.00288	1597764	8.84	0.50255	0.00023	0.50308	0.00043	8.858	0.9976	ACB.omni_wg_2141_filtered.vcf.gz	PASS	2013-04-30 23:10:50	/nfs/1000g-archive/vol1/ftp/data/HG02052/alignment/HG02052.mapped.ILLUMINA.bwa.ACB.low_coverage.20130415.bam		HG02052.mapped.ILLUMINA.bwa.ACB.low_coverage.20130415.bam
9042	HG02409.mapped.ILLUMINA.bwa.CDX.low_coverage.20120522.bam	HG02409	1	ALL	BAM	0.00286	0	1235978	6.26	0.50115	0.00014	0	0	0	0	CDX.omni_wg_2141_filtered.vcf.gz	PASS	2013-05-17 09:24:18	/nfs/1000g-archive/vol1/ftp/data/HG02409/alignment/HG02409.mapped.ILLUMINA.bwa.CDX.low_coverage.20120522.bam		HG02409.mapped.ILLUMINA.bwa.CDX.low_coverage.20120522.bam
28722	HG03950.mapped.ILLUMINA.bwa.STU.low_coverage.20130415.bam	HG03950	1	ALL	BAM	0.00286	0	1753219	8.97	0.50129	0.0002	0	0	0	0	ALL.omni_wg_2141_filtered.vcf.gz	PASS	2013-05-05 12:03:53	/nfs/1000g-archive/vol1/ftp/data/HG03950/alignment/HG03950.mapped.ILLUMINA.bwa.STU.low_coverage.20130415.bam		HG03950.mapped.ILLUMINA.bwa.STU.low_coverage.20130415.bam
26144	HG04147.mapped.ILLUMINA.bwa.BEB.low_coverage.20130415.bam	HG04147	0	ALL	BAM	0.00285	0.00284	783628	5.72	0.5017	0.0002	0.50221	0.00016	5.735	0.9956	BEB.wgs.coriell_phase3_samples.20121126.snps.affy_6.genotypes.vcf.gz	PASS	2013-05-05 07:54:16	/nfs/1000g-archive/vol1/ftp/data/HG04147/alignment/HG04147.mapped.ILLUMINA.bwa.BEB.low_coverage.20130415.bam		HG04147.mapped.ILLUMINA.bwa.BEB.low_coverage.20130415.bam
41347	HG03800.mapped.ILLUMINA.bwa.BEB.low_coverage.20130415.bam	HG03800	1	ALL	BAM	0.00285	0	1753219	9.31	0.50208	0.00018	0	0	0	0	ALL.omni_wg_2141_filtered.vcf.gz	PASS	2013-05-10 10:00:28	/nfs/1000g-archive/vol1/ftp/data/HG03800/alignment/HG03800.mapped.ILLUMINA.bwa.BEB.low_coverage.20130415.bam		HG03800.mapped.ILLUMINA.bwa.BEB.low_coverage.20130415.bam
12389	NA21088.mapped.ILLUMINA.bwa.GIH.low_coverage.20120522.bam	NA21088	1	ALL	BAM	0.00285	0	887456	6.49	0.50198	0.00013	0	0	0	0	ALL.wgs.coriell_phase3_samples.20121126.snps.affy_6.genotypes.vcf.gz	PASS	2013-05-16 17:34:31	/nfs/1000g-archive/vol1/ftp/data/NA21088/alignment/NA21088.mapped.ILLUMINA.bwa.GIH.low_coverage.20120522.bam		NA21088.mapped.ILLUMINA.bwa.GIH.low_coverage.20120522.bam
16696	NA20507.mapped.ILLUMINA.bwa.TSI.low_coverage.20130415.bam	NA20507	1	ALL	BAM	0.00284	0.00277	1402149	6.26	0.50083	0.0002	0.50265	0.00029	6.269	0.9967	TSI.omni_wg_2141_filtered.vcf.gz	PASS	2013-04-30 19:22:05	/nfs/1000g-archive/vol1/ftp/data/NA20507/alignment/NA20507.mapped.ILLUMINA.bwa.TSI.low_coverage.20130415.bam		NA20507.mapped.ILLUMINA.bwa.TSI.low_coverage.20130415.bam
20042	HG03363.mapped.ILLUMINA.bwa.ESN.low_coverage.20130415.bam	HG03363	1	ALL	BAM	0.00284	0.00263	835395	3.13	0.50042	0.00032	0.50149	0.00023	3.135	1.0001	ESN.wgs.coriell_phase3_samples.20121126.snps.affy_6.genotypes.vcf.gz	PASS	2013-05-03 04:53:01	/nfs/1000g-archive/vol1/ftp/data/HG03363/alignment/HG03363.mapped.ILLUMINA.bwa.ESN.low_coverage.20130415.bam		HG03363.mapped.ILLUMINA.bwa.ESN.low_coverage.20130415.bam
47095	HG03788.mapped.ILLUMINA.bwa.ITU.low_coverage.20130415.bam	HG03788	1	ALL	BAM	0.00284	0	1753219	10.89	0.5014	0.00017	0	0	0	0	ALL.omni_wg_2141_filtered.vcf.gz	PASS	2013-05-10 14:16:25	/nfs/1000g-archive/vol1/ftp/data/HG03788/alignment/HG03788.mapped.ILLUMINA.bwa.ITU.low_coverage.20130415.bam		HG03788.mapped.ILLUMINA.bwa.ITU.low_coverage.20130415.bam
58572	HG02923.mapped.ILLUMINA.bwa.ESN.low_coverage.20130415.bam	HG02923	1	ALL	BAM	0.00283	0.00329	835395	9.41	0.50099	0.00014	0.50175	0.00011	9.396	1.0213	ESN.wgs.coriell_phase3_samples.20121126.snps.affy_6.genotypes.vcf.gz	PASS	2013-05-14 02:59:29	/nfs/1000g-archive/vol1/ftp/data/HG02923/alignment/HG02923.mapped.ILLUMINA.bwa.ESN.low_coverage.20130415.bam		HG02923.mapped.ILLUMINA.bwa.ESN.low_coverage.20130415.bam
49694	NA18519.mapped.ILLUMINA.bwa.YRI.low_coverage.20130415.bam	NA18519	1	ALL	BAM	0.00283	0.00278	1559108	11.23	0.50212	0.00047	0.50331	0.00059	11.268	0.9959	YRI.omni_wg_2141_filtered.vcf.gz	PASS	2013-05-10 21:09:05	/nfs/1000g-archive/vol1/ftp/data/NA18519/alignment/NA18519.mapped.ILLUMINA.bwa.YRI.low_coverage.20130415.bam		NA18519.mapped.ILLUMINA.bwa.YRI.low_coverage.20130415.bam
28878	NA10851.mapped.ILLUMINA.bwa.CEU.low_coverage.20130415.bam	NA10851	1	ALL	BAM	0.00283	0.0027	1400785	5.28	0.50088	0.00031	0.50123	0.00045	5.291	0.9994	CEU.omni_wg_2141_filtered.vcf.gz	PASS	2013-05-05 12:19:29	/nfs/1000g-archive/vol1/ftp/data/NA10851/alignment/NA10851.mapped.ILLUMINA.bwa.CEU.low_coverage.20130415.bam		NA10851.mapped.ILLUMINA.bwa.CEU.low_coverage.20130415.bam
8125	NA19064.mapped.ILLUMINA.bwa.JPT.low_coverage.20120522.bam	NA19064	1	ALL	BAM	0.00283	0.00269	1243522	6.44	0.50582	0.00049	0.50625	0.00056	6.485	0.9924	JPT.omni_wg_2141_filtered.vcf.gz	PASS	2013-05-17 09:14:59	/nfs/1000g-archive/vol1/ftp/data/NA19064/alignment/NA19064.mapped.ILLUMINA.bwa.JPT.low_coverage.20120522.bam		NA19064.mapped.ILLUMINA.bwa.JPT.low_coverage.20120522.bam
12857	HG02703.mapped.ILLUMINA.bwa.GWD.low_coverage.20121211.bam	HG02703	1	ALL	BAM	0.00283	0	1753219	10.65	0.50024	0.00023	0	0	0	0	ALL.omni_wg_2141_filtered.vcf.gz	PASS	2013-05-16 21:11:04	/nfs/1000g-archive/vol1/ftp/data/HG02703/alignment/HG02703.mapped.ILLUMINA.bwa.GWD.low_coverage.20121211.bam		HG02703.mapped.ILLUMINA.bwa.GWD.low_coverage.20121211.bam
12040	HG02807.mapped.ILLUMINA.bwa.GWD.low_coverage.20121211.bam	HG02807	1	ALL	BAM	0.00283	0	1753219	8.06	0.49964	0.00038	0	0	0	0	ALL.omni_wg_2141_filtered.vcf.gz	PASS	2013-05-17 03:32:35	/nfs/1000g-archive/vol1/ftp/data/HG02807/alignment/HG02807.mapped.ILLUMINA.bwa.GWD.low_coverage.20121211.bam		HG02807.mapped.ILLUMINA.bwa.GWD.low_coverage.20121211.bam
22944	HG03673.mapped.ILLUMINA.bwa.STU.low_coverage.20130415.bam	HG03673	1	ALL	BAM	0.00283	0	1753219	9.18	0.50081	0.00034	0	0	0	0	ALL.omni_wg_2141_filtered.vcf.gz	PASS	2013-05-03 11:48:10	/nfs/1000g-archive/vol1/ftp/data/HG03673/alignment/HG03673.mapped.ILLUMINA.bwa.STU.low_coverage.20130415.bam		HG03673.mapped.ILLUMINA.bwa.STU.low_coverage.20130415.bam
23050	HG03756.mapped.ILLUMINA.bwa.STU.low_coverage.20130415.bam	HG03756	1	ALL	BAM	0.00283	0	1753219	9.96	0.49999	0.00013	0	0	0	0	ALL.omni_wg_2141_filtered.vcf.gz	PASS	2013-05-03 12:08:41	/nfs/1000g-archive/vol1/ftp/data/HG03756/alignment/HG03756.mapped.ILLUMINA.bwa.STU.low_coverage.20130415.bam		HG03756.mapped.ILLUMINA.bwa.STU.low_coverage.20130415.bam
47793	NA19454.mapped.ILLUMINA.bwa.LWK.low_coverage.20130415.bam	NA19454	1	ALL	BAM	0.00283	0	887456	9.58	0.50092	0.0002	0	0	0	0	ALL.wgs.coriell_phase3_samples.20121126.snps.affy_6.genotypes.vcf.gz	PASS	2013-05-10 19:03:47	/nfs/1000g-archive/vol1/ftp/data/NA19454/alignment/NA19454.mapped.ILLUMINA.bwa.LWK.low_coverage.20130415.bam		NA19454.mapped.ILLUMINA.bwa.LWK.low_coverage.20130415.bam
12898	NA21124.mapped.ILLUMINA.bwa.GIH.low_coverage.20121211.bam	NA21124	1	ALL	BAM	0.00282	0	887456	7.8	0.50157	0.00013	0	0	0	0	ALL.wgs.coriell_phase3_samples.20121126.snps.affy_6.genotypes.vcf.gz	PASS	2013-05-17 00:11:35	/nfs/1000g-archive/vol1/ftp/data/NA21124/alignment/NA21124.mapped.ILLUMINA.bwa.GIH.low_coverage.20121211.bam		NA21124.mapped.ILLUMINA.bwa.GIH.low_coverage.20121211.bam
8832	NA19081.mapped.ILLUMINA.bwa.JPT.low_coverage.20120522.bam	NA19081	1	ALL	BAM	0.00281	0.0035	1243522	3.08	0.50477	0.0007	0.50448	0.00088	3.097	0.9969	JPT.omni_wg_2141_filtered.vcf.gz	PASS	2013-05-17 05:22:36	/nfs/1000g-archive/vol1/ftp/data/NA19081/alignment/NA19081.mapped.ILLUMINA.bwa.JPT.low_coverage.20120522.bam		NA19081.mapped.ILLUMINA.bwa.JPT.low_coverage.20120522.bam
7149	NA19311.mapped.ILLUMINA.bwa.LWK.low_coverage.20120522.bam	NA19311	0	ALL	BAM	0.00281	0.00268	1570264	4.48	0.50477	0.00104	0.50531	0.0011	4.522	0.9854	LWK.omni_wg_2141_filtered.vcf.gz	PASS	2013-05-17 10:30:21	/nfs/1000g-archive/vol1/ftp/data/NA19311/alignment/NA19311.mapped.ILLUMINA.bwa.LWK.low_coverage.20120522.bam		NA19311.mapped.ILLUMINA.bwa.LWK.low_coverage.20120522.bam
6613	HG00142.mapped.ILLUMINA.bwa.GBR.low_coverage.20120522.bam	HG00142	1	ALL	BAM	0.00281	0.00153	1389642	3.47	0.50213	0.00053	0.5019	0.0005	3.472	0.9999	GBR.omni_wg_2141_filtered.vcf.gz	PASS	2013-05-16 21:18:16	/nfs/1000g-archive/vol1/ftp/data/HG00142/alignment/HG00142.mapped.ILLUMINA.bwa.GBR.low_coverage.20120522.bam		HG00142.mapped.ILLUMINA.bwa.GBR.low_coverage.20120522.bam
45735	HG03784.mapped.ILLUMINA.bwa.ITU.low_coverage.20130415.bam	HG03784	1	ALL	BAM	0.00281	0	1753219	8.51	0.50093	0.00029	0	0	0	0	ALL.omni_wg_2141_filtered.vcf.gz	PASS	2013-05-10 13:24:13	/nfs/1000g-archive/vol1/ftp/data/HG03784/alignment/HG03784.mapped.ILLUMINA.bwa.ITU.low_coverage.20130415.bam		HG03784.mapped.ILLUMINA.bwa.ITU.low_coverage.20130415.bam
26993	HG04152.mapped.ILLUMINA.bwa.BEB.low_coverage.20130415.bam	HG04152	1	ALL	BAM	0.00281	0	1753219	8.33	0.50077	8e-05	0	0	0	0	ALL.omni_wg_2141_filtered.vcf.gz	PASS	2013-05-05 08:47:20	/nfs/1000g-archive/vol1/ftp/data/HG04152/alignment/HG04152.mapped.ILLUMINA.bwa.BEB.low_coverage.20130415.bam		HG04152.mapped.ILLUMINA.bwa.BEB.low_coverage.20130415.bam
13024	NA19443.mapped.ILLUMINA.bwa.LWK.low_coverage.20120522.bam	NA19443	1	ALL	BAM	0.00281	0	887456	10.12	0.50094	0.00025	0	0	0	0	ALL.wgs.coriell_phase3_samples.20121126.snps.affy_6.genotypes.vcf.gz	PASS	2013-05-16 17:27:04	/nfs/1000g-archive/vol1/ftp/data/NA19443/alignment/NA19443.mapped.ILLUMINA.bwa.LWK.low_coverage.20120522.bam		NA19443.mapped.ILLUMINA.bwa.LWK.low_coverage.20120522.bam
48873	NA20811.mapped.ILLUMINA.bwa.TSI.low_coverage.20130415.bam	NA20811	1	ALL	BAM	0.0028	0.00283	1402149	5.41	0.50149	0.0004	0.50197	0.00036	5.419	0.9987	TSI.omni_wg_2141_filtered.vcf.gz	PASS	2013-05-10 20:27:03	/nfs/1000g-archive/vol1/ftp/data/NA20811/alignment/NA20811.mapped.ILLUMINA.bwa.TSI.low_coverage.20130415.bam		NA20811.mapped.ILLUMINA.bwa.TSI.low_coverage.20130415.bam
34555	NA20521.mapped.ILLUMINA.bwa.TSI.low_coverage.20130415.bam	NA20521	1	ALL	BAM	0.0028	0.00264	1402149	6.22	0.50238	0.00024	0.50272	0.00031	6.218	1.0001	TSI.omni_wg_2141_filtered.vcf.gz	PASS	2013-05-08 05:35:24	/nfs/1000g-archive/vol1/ftp/data/NA20521/alignment/NA20521.mapped.ILLUMINA.bwa.TSI.low_coverage.20130415.bam		NA20521.mapped.ILLUMINA.bwa.TSI.low_coverage.20130415.bam
10015	HG01187.mapped.ILLUMINA.bwa.PUR.low_coverage.20120522.bam	HG01187	1	ALL	BAM	0.0028	0	854341	5.95	0.50063	0.00039	0	0	0	0	PUR.wgs.coriell_phase3_samples.20121126.snps.affy_6.genotypes.vcf.gz	PASS	2013-05-16 12:14:21	/nfs/1000g-archive/vol1/ftp/data/HG01187/alignment/HG01187.mapped.ILLUMINA.bwa.PUR.low_coverage.20120522.bam		HG01187.mapped.ILLUMINA.bwa.PUR.low_coverage.20120522.bam
63846	HG02943.mapped.ILLUMINA.bwa.ESN.low_coverage.20130415.bam	HG02943	1	ALL	BAM	0.0028	0	1753219	8.03	0.49963	0.00031	0	0	0	0	ALL.omni_wg_2141_filtered.vcf.gz	PASS	2013-05-14 07:43:36	/nfs/1000g-archive/vol1/ftp/data/HG02943/alignment/HG02943.mapped.ILLUMINA.bwa.ESN.low_coverage.20130415.bam		HG02943.mapped.ILLUMINA.bwa.ESN.low_coverage.20130415.bam
29130	HG03898.mapped.ILLUMINA.bwa.STU.low_coverage.20130415.bam	HG03898	1	ALL	BAM	0.0028	0	1753219	9.98	0.5015	0.00015	0	0	0	0	ALL.omni_wg_2141_filtered.vcf.gz	PASS	2013-05-05 13:18:00	/nfs/1000g-archive/vol1/ftp/data/HG03898/alignment/HG03898.mapped.ILLUMINA.bwa.STU.low_coverage.20130415.bam		HG03898.mapped.ILLUMINA.bwa.STU.low_coverage.20130415.bam
43780	HG03771.mapped.ILLUMINA.bwa.ITU.low_coverage.20130415.bam	HG03771	1	ALL	BAM	0.00279	0.00292	781365	9.72	0.50092	0.00017	0.50078	0.0002	9.685	1.0222	ITU.wgs.coriell_phase3_samples.20121126.snps.affy_6.genotypes.vcf.gz	PASS	2013-05-10 11:46:04	/nfs/1000g-archive/vol1/ftp/data/HG03771/alignment/HG03771.mapped.ILLUMINA.bwa.ITU.low_coverage.20130415.bam		HG03771.mapped.ILLUMINA.bwa.ITU.low_coverage.20130415.bam
49646	NA18489.mapped.ILLUMINA.bwa.YRI.low_coverage.20130415.bam	NA18489	1	ALL	BAM	0.00279	0.00285	1559108	10.7	0.50307	0.00042	0.50386	0.0005	10.731	0.9967	YRI.omni_wg_2141_filtered.vcf.gz	PASS	2013-05-10 21:01:33	/nfs/1000g-archive/vol1/ftp/data/NA18489/alignment/NA18489.mapped.ILLUMINA.bwa.YRI.low_coverage.20130415.bam		NA18489.mapped.ILLUMINA.bwa.YRI.low_coverage.20130415.bam
41566	NA20766.mapped.ILLUMINA.bwa.TSI.low_coverage.20130422.bam	NA20766	1	ALL	BAM	0.00279	0.00278	1402149	7.46	0.5012	0.00017	0.50239	0.00033	7.467	1.0007	TSI.omni_wg_2141_filtered.vcf.gz	PASS	2013-05-14 02:50:48	/nfs/1000g-archive/vol1/ftp/data/NA20766/alignment/NA20766.mapped.ILLUMINA.bwa.TSI.low_coverage.20130422.bam		NA20766.mapped.ILLUMINA.bwa.TSI.low_coverage.20130422.bam
13009	HG03589.mapped.ILLUMINA.bwa.BEB.low_coverage.20121211.bam	HG03589	1	ALL	BAM	0.00279	0.00267	783628	5.83	0.50131	0.00017	0.50098	0.00013	5.841	0.9993	BEB.wgs.coriell_phase3_samples.20121126.snps.affy_6.genotypes.vcf.gz	PASS	2013-05-16 18:01:16	/nfs/1000g-archive/vol1/ftp/data/HG03589/alignment/HG03589.mapped.ILLUMINA.bwa.BEB.low_coverage.20121211.bam		HG03589.mapped.ILLUMINA.bwa.BEB.low_coverage.20121211.bam
56731	NA12749.mapped.ILLUMINA.bwa.CEU.low_coverage.20130415.bam	NA12749	1	ALL	BAM	0.00279	0	887456	8.5	0.50166	0.0003	0	0	0	0	ALL.wgs.coriell_phase3_samples.20121126.snps.affy_6.genotypes.vcf.gz	PASS	2013-05-14 01:43:09	/nfs/1000g-archive/vol1/ftp/data/NA12749/alignment/NA12749.mapped.ILLUMINA.bwa.CEU.low_coverage.20130415.bam		NA12749.mapped.ILLUMINA.bwa.CEU.low_coverage.20130415.bam
8341	NA20897.mapped.ILLUMINA.bwa.GIH.low_coverage.20120522.bam	NA20897	1	ALL	BAM	0.00278	0.0031	1368816	6.04	0.50267	0.00019	0.50198	0.00037	6.045	1.0007	GIH.omni_wg_2141_filtered.vcf.gz	PASS	2013-05-16 22:37:00	/nfs/1000g-archive/vol1/ftp/data/NA20897/alignment/NA20897.mapped.ILLUMINA.bwa.GIH.low_coverage.20120522.bam		NA20897.mapped.ILLUMINA.bwa.GIH.low_coverage.20120522.bam
21473	HG03027.mapped.ILLUMINA.bwa.GWD.low_coverage.20130415.bam	HG03027	1	ALL	BAM	0.00278	0.00295	840560	10.65	0.50247	0.00058	0.50296	0.00055	10.634	1.0213	GWD.wgs.coriell_phase3_samples.20121126.snps.affy_6.genotypes.vcf.gz	PASS	2013-05-03 07:31:32	/nfs/1000g-archive/vol1/ftp/data/HG03027/alignment/HG03027.mapped.ILLUMINA.bwa.GWD.low_coverage.20130415.bam		HG03027.mapped.ILLUMINA.bwa.GWD.low_coverage.20130415.bam
10814	HG01168.mapped.ILLUMINA.bwa.PUR.low_coverage.20120522.bam	HG01168	1	ALL	BAM	0.00278	0	854341	3.86	0.50318	0.00063	0	0	0	0	PUR.wgs.coriell_phase3_samples.20121126.snps.affy_6.genotypes.vcf.gz	PASS	2013-05-16 17:19:39	/nfs/1000g-archive/vol1/ftp/data/HG01168/alignment/HG01168.mapped.ILLUMINA.bwa.PUR.low_coverage.20120522.bam		HG01168.mapped.ILLUMINA.bwa.PUR.low_coverage.20120522.bam
11063	HG01359.mapped.ILLUMINA.bwa.CLM.low_coverage.20120522.bam	HG01359	1	ALL	BAM	0.00278	0	832763	5.17	0.50161	0.00031	0	0	0	0	CLM.wgs.coriell_phase3_samples.20121126.snps.affy_6.genotypes.vcf.gz	PASS	2013-05-16 06:34:44	/nfs/1000g-archive/vol1/ftp/data/HG01359/alignment/HG01359.mapped.ILLUMINA.bwa.CLM.low_coverage.20120522.bam		HG01359.mapped.ILLUMINA.bwa.CLM.low_coverage.20120522.bam
11956	HG03307.mapped.ILLUMINA.bwa.ESN.low_coverage.20121211.bam	HG03307	0	ALL	BAM	0.00278	0	1753219	8.25	0.50023	0.00043	0	0	0	0	ALL.omni_wg_2141_filtered.vcf.gz	PASS	2013-05-17 05:33:53	/nfs/1000g-archive/vol1/ftp/data/HG03307/alignment/HG03307.mapped.ILLUMINA.bwa.ESN.low_coverage.20121211.bam		HG03307.mapped.ILLUMINA.bwa.ESN.low_coverage.20121211.bam
39995	NA20808.mapped.ILLUMINA.bwa.TSI.low_coverage.20130415.bam	NA20808	1	ALL	BAM	0.00278	0	887456	5.42	0.50417	0.00084	0	0	0	0	ALL.wgs.coriell_phase3_samples.20121126.snps.affy_6.genotypes.vcf.gz	PASS	2013-05-10 08:09:46	/nfs/1000g-archive/vol1/ftp/data/NA20808/alignment/NA20808.mapped.ILLUMINA.bwa.TSI.low_coverage.20130415.bam		NA20808.mapped.ILLUMINA.bwa.TSI.low_coverage.20130415.bam
10119	NA20870.mapped.ILLUMINA.bwa.GIH.low_coverage.20120522.bam	NA20870	1	ALL	BAM	0.00277	0.00418	1368816	4.19	0.50358	0.00074	0.50252	0.00048	4.199	0.9984	GIH.omni_wg_2141_filtered.vcf.gz	PASS	2013-05-16 10:11:27	/nfs/1000g-archive/vol1/ftp/data/NA20870/alignment/NA20870.mapped.ILLUMINA.bwa.GIH.low_coverage.20120522.bam		NA20870.mapped.ILLUMINA.bwa.GIH.low_coverage.20120522.bam
12572	HG02570.mapped.ILLUMINA.bwa.GWD.low_coverage.20121211.bam	HG02570	1	ALL	BAM	0.00277	0.00319	840560	9.83	0.50098	9e-05	0.50112	0.0001	9.8	1.0231	GWD.wgs.coriell_phase3_samples.20121126.snps.affy_6.genotypes.vcf.gz	PASS	2013-05-16 20:46:07	/nfs/1000g-archive/vol1/ftp/data/HG02570/alignment/HG02570.mapped.ILLUMINA.bwa.GWD.low_coverage.20121211.bam		HG02570.mapped.ILLUMINA.bwa.GWD.low_coverage.20121211.bam
17378	HG01624.mapped.ILLUMINA.bwa.IBS.low_coverage.20130415.bam	HG01624	1	ALL	BAM	0.00277	0.00301	1400201	7.91	0.50042	0.00028	0.50108	0.00024	7.909	1.003	IBS.omni_wg_2141_filtered.vcf.gz	PASS	2013-04-30 20:38:49	/nfs/1000g-archive/vol1/ftp/data/HG01624/alignment/HG01624.mapped.ILLUMINA.bwa.IBS.low_coverage.20130415.bam		HG01624.mapped.ILLUMINA.bwa.IBS.low_coverage.20130415.bam
10401	NA19457.mapped.ILLUMINA.bwa.LWK.low_coverage.20120522.bam	NA19457	1	ALL	BAM	0.00277	0.00297	1570264	4.59	0.50408	0.00047	0.50415	0.00053	4.606	0.9959	LWK.omni_wg_2141_filtered.vcf.gz	PASS	2013-05-16 15:43:16	/nfs/1000g-archive/vol1/ftp/data/NA19457/alignment/NA19457.mapped.ILLUMINA.bwa.LWK.low_coverage.20120522.bam		NA19457.mapped.ILLUMINA.bwa.LWK.low_coverage.20120522.bam
12092	HG02476.mapped.ILLUMINA.bwa.ACB.low_coverage.20121211.bam	HG02476	1	ALL	BAM	0.00277	0.00277	849391	6.74	0.50139	0.00016	0.50167	9e-05	6.747	0.9985	ACB.wgs.coriell_phase3_samples.20121126.snps.affy_6.genotypes.vcf.gz	PASS	2013-05-16 17:10:11	/nfs/1000g-archive/vol1/ftp/data/HG02476/alignment/HG02476.mapped.ILLUMINA.bwa.ACB.low_coverage.20121211.bam		HG02476.mapped.ILLUMINA.bwa.ACB.low_coverage.20121211.bam
59469	HG02284.mapped.ILLUMINA.bwa.ACB.low_coverage.20130415.bam	HG02284	1	ALL	BAM	0.00276	0.00292	1597764	11.61	0.50138	0.00031	0.50256	0.00041	11.632	0.9986	ACB.omni_wg_2141_filtered.vcf.gz	PASS	2013-05-14 03:38:59	/nfs/1000g-archive/vol1/ftp/data/HG02284/alignment/HG02284.mapped.ILLUMINA.bwa.ACB.low_coverage.20130415.bam		HG02284.mapped.ILLUMINA.bwa.ACB.low_coverage.20130415.bam
62624	HG02025.mapped.ILLUMINA.bwa.KHV.low_coverage.20130415.bam	HG02025	1	ALL	BAM	0.00275	0.00277	1241587	14.56	0.50177	0.00047	0.5021	0.00052	14.591	0.9982	KHV.omni_wg_2141_filtered.vcf.gz	PASS	2013-05-14 06:12:17	/nfs/1000g-archive/vol1/ftp/data/HG02025/alignment/HG02025.mapped.ILLUMINA.bwa.KHV.low_coverage.20130415.bam		HG02025.mapped.ILLUMINA.bwa.KHV.low_coverage.20130415.bam
9881	HG02224.mapped.ILLUMINA.bwa.IBS.low_coverage.20120522.bam	HG02224	1	ALL	BAM	0.00275	0	753862	3.19	0.50641	0.00226	0	0	0	0	IBS.wgs.coriell_phase3_samples.20121126.snps.affy_6.genotypes.vcf.gz	PASS	2013-05-16 14:25:13	/nfs/1000g-archive/vol1/ftp/data/HG02224/alignment/HG02224.mapped.ILLUMINA.bwa.IBS.low_coverage.20120522.bam		HG02224.mapped.ILLUMINA.bwa.IBS.low_coverage.20120522.bam
12533	HG02702.mapped.ILLUMINA.bwa.GWD.low_coverage.20121211.bam	HG02702	1	ALL	BAM	0.00275	0	1753219	8.96	0.49991	0.00034	0	0	0	0	ALL.omni_wg_2141_filtered.vcf.gz	PASS	2013-05-17 15:33:15	/nfs/1000g-archive/vol1/ftp/data/HG02702/alignment/HG02702.mapped.ILLUMINA.bwa.GWD.low_coverage.20121211.bam		HG02702.mapped.ILLUMINA.bwa.GWD.low_coverage.20121211.bam
13229	HG03052.mapped.ILLUMINA.bwa.MSL.low_coverage.20121211.bam	HG03052	1	ALL	BAM	0.00275	0	1753219	9.45	0.50079	0.00032	0	0	0	0	ALL.omni_wg_2141_filtered.vcf.gz	PASS	2013-05-17 07:51:17	/nfs/1000g-archive/vol1/ftp/data/HG03052/alignment/HG03052.mapped.ILLUMINA.bwa.MSL.low_coverage.20121211.bam		HG03052.mapped.ILLUMINA.bwa.MSL.low_coverage.20121211.bam
28362	HG03849.mapped.ILLUMINA.bwa.STU.low_coverage.20130415.bam	HG03849	1	ALL	BAM	0.00275	0	1753219	10.39	0.50111	0.00022	0	0	0	0	ALL.omni_wg_2141_filtered.vcf.gz	PASS	2013-05-05 11:45:00	/nfs/1000g-archive/vol1/ftp/data/HG03849/alignment/HG03849.mapped.ILLUMINA.bwa.STU.low_coverage.20130415.bam		HG03849.mapped.ILLUMINA.bwa.STU.low_coverage.20130415.bam
20867	HG03462.mapped.ILLUMINA.bwa.MSL.low_coverage.20130415.bam	HG03462	0	ALL	BAM	0.00274	0.00434	838168	3.78	0.50168	0.00038	0.50092	0.00028	3.773	1.0226	MSL.wgs.coriell_phase3_samples.20121126.snps.affy_6.genotypes.vcf.gz	PASS	2013-05-03 05:37:19	/nfs/1000g-archive/vol1/ftp/data/HG03462/alignment/HG03462.mapped.ILLUMINA.bwa.MSL.low_coverage.20130415.bam		HG03462.mapped.ILLUMINA.bwa.MSL.low_coverage.20130415.bam
8152	HG02363.mapped.ILLUMINA.bwa.CDX.low_coverage.20120522.bam	HG02363	0	ALL	BAM	0.00274	0.00266	1235978	6.7	0.5014	0.00025	0.50116	0.00027	6.704	0.9998	CDX.omni_wg_2141_filtered.vcf.gz	PASS	2013-05-17 02:10:28	/nfs/1000g-archive/vol1/ftp/data/HG02363/alignment/HG02363.mapped.ILLUMINA.bwa.CDX.low_coverage.20120522.bam		HG02363.mapped.ILLUMINA.bwa.CDX.low_coverage.20120522.bam
62687	HG02675.mapped.ILLUMINA.bwa.GWD.low_coverage.20130415.bam	HG02675	1	ALL	BAM	0.00274	0	1753219	8.45	0.49974	0.00034	0	0	0	0	ALL.omni_wg_2141_filtered.vcf.gz	PASS	2013-05-14 06:31:18	/nfs/1000g-archive/vol1/ftp/data/HG02675/alignment/HG02675.mapped.ILLUMINA.bwa.GWD.low_coverage.20130415.bam		HG02675.mapped.ILLUMINA.bwa.GWD.low_coverage.20130415.bam
63772	HG02799.mapped.ILLUMINA.bwa.GWD.low_coverage.20130415.bam	HG02799	1	ALL	BAM	0.00274	0	1753219	8.76	0.49974	0.00034	0	0	0	0	ALL.omni_wg_2141_filtered.vcf.gz	PASS	2013-05-14 07:43:24	/nfs/1000g-archive/vol1/ftp/data/HG02799/alignment/HG02799.mapped.ILLUMINA.bwa.GWD.low_coverage.20130415.bam		HG02799.mapped.ILLUMINA.bwa.GWD.low_coverage.20130415.bam
46309	HG03643.mapped.ILLUMINA.bwa.STU.low_coverage.20130415.bam	HG03643	1	ALL	BAM	0.00274	0	1753219	10.49	0.5018	0.00025	0	0	0	0	ALL.omni_wg_2141_filtered.vcf.gz	PASS	2013-05-10 13:42:54	/nfs/1000g-archive/vol1/ftp/data/HG03643/alignment/HG03643.mapped.ILLUMINA.bwa.STU.low_coverage.20130415.bam		HG03643.mapped.ILLUMINA.bwa.STU.low_coverage.20130415.bam
44951	HG03789.mapped.ILLUMINA.bwa.ITU.low_coverage.20130415.bam	HG03789	1	ALL	BAM	0.00274	0	1753219	8.45	0.50177	0.00032	0	0	0	0	ALL.omni_wg_2141_filtered.vcf.gz	PASS	2013-05-10 12:58:10	/nfs/1000g-archive/vol1/ftp/data/HG03789/alignment/HG03789.mapped.ILLUMINA.bwa.ITU.low_coverage.20130415.bam		HG03789.mapped.ILLUMINA.bwa.ITU.low_coverage.20130415.bam
26904	HG04070.mapped.ILLUMINA.bwa.ITU.low_coverage.20130415.bam	HG04070	1	ALL	BAM	0.00274	0	1753219	7.08	0.49977	0.00012	0	0	0	0	ALL.omni_wg_2141_filtered.vcf.gz	PASS	2013-05-05 08:30:47	/nfs/1000g-archive/vol1/ftp/data/HG04070/alignment/HG04070.mapped.ILLUMINA.bwa.ITU.low_coverage.20130415.bam		HG04070.mapped.ILLUMINA.bwa.ITU.low_coverage.20130415.bam
12644	HG02810.mapped.ILLUMINA.bwa.GWD.low_coverage.20121211.bam	HG02810	1	ALL	BAM	0.00273	0.00334	840560	10.48	0.50107	0.00016	0.50082	0.00014	10.45	1.0244	GWD.wgs.coriell_phase3_samples.20121126.snps.affy_6.genotypes.vcf.gz	PASS	2013-05-16 16:00:43	/nfs/1000g-archive/vol1/ftp/data/HG02810/alignment/HG02810.mapped.ILLUMINA.bwa.GWD.low_coverage.20121211.bam		HG02810.mapped.ILLUMINA.bwa.GWD.low_coverage.20121211.bam
42156	HG03692.mapped.ILLUMINA.bwa.STU.low_coverage.20130415.bam	HG03692	1	ALL	BAM	0.00273	0.00283	779732	10.68	0.50185	0.00015	0.50168	0.00019	10.708	0.9955	STU.wgs.coriell_phase3_samples.20121126.snps.affy_6.genotypes.vcf.gz	PASS	2013-05-10 10:49:45	/nfs/1000g-archive/vol1/ftp/data/HG03692/alignment/HG03692.mapped.ILLUMINA.bwa.STU.low_coverage.20130415.bam		HG03692.mapped.ILLUMINA.bwa.STU.low_coverage.20130415.bam
62212	HG00115.mapped.ILLUMINA.bwa.GBR.low_coverage.20130415.bam	HG00115	1	ALL	BAM	0.00273	0.0026	1389642	7.42	0.50101	0.00024	0.50185	0.00029	7.432	0.999	GBR.omni_wg_2141_filtered.vcf.gz	PASS	2013-05-14 05:27:40	/nfs/1000g-archive/vol1/ftp/data/HG00115/alignment/HG00115.mapped.ILLUMINA.bwa.GBR.low_coverage.20130415.bam		HG00115.mapped.ILLUMINA.bwa.GBR.low_coverage.20130415.bam
16335	HG01625.mapped.ILLUMINA.bwa.IBS.low_coverage.20130415.bam	HG01625	1	ALL	BAM	0.00273	0.00258	1400201	7.08	0.50073	0.00021	0.50159	0.00033	7.075	1.0051	IBS.omni_wg_2141_filtered.vcf.gz	PASS	2013-04-30 18:55:47	/nfs/1000g-archive/vol1/ftp/data/HG01625/alignment/HG01625.mapped.ILLUMINA.bwa.IBS.low_coverage.20130415.bam		HG01625.mapped.ILLUMINA.bwa.IBS.low_coverage.20130415.bam
8586	HG01936.mapped.ILLUMINA.bwa.PEL.low_coverage.20120522.bam	HG01936	1	ALL	BAM	0.00273	0.00222	1304517	5.97	0.50096	0.00053	0.50145	0.00042	5.967	1.0039	PEL.omni_wg_2141_filtered.vcf.gz	PASS	2013-05-17 00:59:41	/nfs/1000g-archive/vol1/ftp/data/HG01936/alignment/HG01936.mapped.ILLUMINA.bwa.PEL.low_coverage.20120522.bam		HG01936.mapped.ILLUMINA.bwa.PEL.low_coverage.20120522.bam
39780	HG01048.mapped.ILLUMINA.bwa.PUR.low_coverage.20130415.bam	HG01048	1	ALL	BAM	0.00273	0	854341	8.26	0.502	0.00027	0	0	0	0	PUR.wgs.coriell_phase3_samples.20121126.snps.affy_6.genotypes.vcf.gz	PASS	2013-05-10 07:54:58	/nfs/1000g-archive/vol1/ftp/data/HG01048/alignment/HG01048.mapped.ILLUMINA.bwa.PUR.low_coverage.20130415.bam		HG01048.mapped.ILLUMINA.bwa.PUR.low_coverage.20130415.bam
12543	HG02583.mapped.ILLUMINA.bwa.GWD.low_coverage.20121211.bam	HG02583	1	ALL	BAM	0.00273	0	1753219	8.58	0.4986	0.0003	0	0	0	0	ALL.omni_wg_2141_filtered.vcf.gz	PASS	2013-05-16 16:56:59	/nfs/1000g-archive/vol1/ftp/data/HG02583/alignment/HG02583.mapped.ILLUMINA.bwa.GWD.low_coverage.20121211.bam		HG02583.mapped.ILLUMINA.bwa.GWD.low_coverage.20121211.bam
48729	NA19323.mapped.ILLUMINA.bwa.LWK.low_coverage.20130415.bam	NA19323	1	ALL	BAM	0.00273	0	887456	8.41	0.50221	0.00023	0	0	0	0	ALL.wgs.coriell_phase3_samples.20121126.snps.affy_6.genotypes.vcf.gz	PASS	2013-05-10 20:17:08	/nfs/1000g-archive/vol1/ftp/data/NA19323/alignment/NA19323.mapped.ILLUMINA.bwa.LWK.low_coverage.20130415.bam		NA19323.mapped.ILLUMINA.bwa.LWK.low_coverage.20130415.bam
43225	HG03786.mapped.ILLUMINA.bwa.ITU.low_coverage.20130415.bam	HG03786	1	ALL	BAM	0.00272	0.00324	781365	9.56	0.50119	0.00012	0.50188	0.00018	9.519	1.0224	ITU.wgs.coriell_phase3_samples.20121126.snps.affy_6.genotypes.vcf.gz	PASS	2013-05-10 11:32:25	/nfs/1000g-archive/vol1/ftp/data/HG03786/alignment/HG03786.mapped.ILLUMINA.bwa.ITU.low_coverage.20130415.bam		HG03786.mapped.ILLUMINA.bwa.ITU.low_coverage.20130415.bam
25764	HG04062.mapped.ILLUMINA.bwa.ITU.low_coverage.20130415.bam	HG04062	1	ALL	BAM	0.00272	0.00269	781365	3.68	0.50107	0.00031	0.50185	0.00032	3.682	0.9986	ITU.wgs.coriell_phase3_samples.20121126.snps.affy_6.genotypes.vcf.gz	PASS	2013-05-05 06:27:03	/nfs/1000g-archive/vol1/ftp/data/HG04062/alignment/HG04062.mapped.ILLUMINA.bwa.ITU.low_coverage.20130415.bam		HG04062.mapped.ILLUMINA.bwa.ITU.low_coverage.20130415.bam
8263	HG01804.mapped.ILLUMINA.bwa.CDX.low_coverage.20120522.bam	HG01804	1	ALL	BAM	0.00272	0.00257	1235978	5.96	0.50085	0.00015	0.50207	0.0002	5.964	1.0013	CDX.omni_wg_2141_filtered.vcf.gz	PASS	2013-05-17 01:37:35	/nfs/1000g-archive/vol1/ftp/data/HG01804/alignment/HG01804.mapped.ILLUMINA.bwa.CDX.low_coverage.20120522.bam		HG01804.mapped.ILLUMINA.bwa.CDX.low_coverage.20120522.bam
11236	HG03049.mapped.ILLUMINA.bwa.GWD.low_coverage.20121211.bam	HG03049	1	ALL	BAM	0.00271	0	1753219	8.69	0.50006	0.00032	0	0	0	0	ALL.omni_wg_2141_filtered.vcf.gz	PASS	2013-05-17 14:30:07	/nfs/1000g-archive/vol1/ftp/data/HG03049/alignment/HG03049.mapped.ILLUMINA.bwa.GWD.low_coverage.20121211.bam		HG03049.mapped.ILLUMINA.bwa.GWD.low_coverage.20121211.bam
12205	HG03452.mapped.ILLUMINA.bwa.MSL.low_coverage.20121211.bam	HG03452	1	ALL	BAM	0.00271	0	1753219	8.99	0.50051	0.00029	0	0	0	0	ALL.omni_wg_2141_filtered.vcf.gz	PASS	2013-05-17 02:21:20	/nfs/1000g-archive/vol1/ftp/data/HG03452/alignment/HG03452.mapped.ILLUMINA.bwa.MSL.low_coverage.20121211.bam		HG03452.mapped.ILLUMINA.bwa.MSL.low_coverage.20121211.bam
12436	HG03009.mapped.ILLUMINA.bwa.BEB.low_coverage.20121211.bam	HG03009	1	ALL	BAM	0.0027	0.00287	783628	6.04	0.49941	3e-05	0.50031	7e-05	6.019	1.0217	BEB.wgs.coriell_phase3_samples.20121126.snps.affy_6.genotypes.vcf.gz	PASS	2013-05-16 18:43:20	/nfs/1000g-archive/vol1/ftp/data/HG03009/alignment/HG03009.mapped.ILLUMINA.bwa.BEB.low_coverage.20121211.bam		HG03009.mapped.ILLUMINA.bwa.BEB.low_coverage.20121211.bam
12862	HG01965.mapped.ILLUMINA.bwa.PEL.low_coverage.20121211.bam	HG01965	1	ALL	BAM	0.0027	0.00117	779795	4.75	0.50163	0.00065	0.50038	0.00011	4.761	0.9976	PEL.wgs.coriell_phase3_samples.20121126.snps.affy_6.genotypes.vcf.gz	PASS	2013-05-16 12:23:49	/nfs/1000g-archive/vol1/ftp/data/HG01965/alignment/HG01965.mapped.ILLUMINA.bwa.PEL.low_coverage.20121211.bam		HG01965.mapped.ILLUMINA.bwa.PEL.low_coverage.20121211.bam
21340	HG02964.mapped.ILLUMINA.bwa.ESN.low_coverage.20130415.bam	HG02964	0	ALL	BAM	0.00269	0.00348	835395	4.36	0.50179	0.00044	0.50157	0.00038	4.375	0.996	ESN.wgs.coriell_phase3_samples.20121126.snps.affy_6.genotypes.vcf.gz	PASS	2013-05-03 07:13:32	/nfs/1000g-archive/vol1/ftp/data/HG02964/alignment/HG02964.mapped.ILLUMINA.bwa.ESN.low_coverage.20130415.bam		HG02964.mapped.ILLUMINA.bwa.ESN.low_coverage.20130415.bam
24993	HG04164.mapped.ILLUMINA.bwa.BEB.low_coverage.20130415.bam	HG04164	1	ALL	BAM	0.00269	0.00289	783628	8.37	0.50001	6e-05	0.50046	5e-05	8.341	1.0224	BEB.wgs.coriell_phase3_samples.20121126.snps.affy_6.genotypes.vcf.gz	PASS	2013-05-05 05:38:30	/nfs/1000g-archive/vol1/ftp/data/HG04164/alignment/HG04164.mapped.ILLUMINA.bwa.BEB.low_coverage.20130415.bam		HG04164.mapped.ILLUMINA.bwa.BEB.low_coverage.20130415.bam
50035	NA18952.mapped.ILLUMINA.bwa.JPT.low_coverage.20130415.bam	NA18952	1	ALL	BAM	0.00269	0.0026	1243522	6.32	0.50298	0.00045	0.50291	0.00047	6.329	0.9994	JPT.omni_wg_2141_filtered.vcf.gz	PASS	2013-05-10 22:37:58	/nfs/1000g-archive/vol1/ftp/data/NA18952/alignment/NA18952.mapped.ILLUMINA.bwa.JPT.low_coverage.20130415.bam		NA18952.mapped.ILLUMINA.bwa.JPT.low_coverage.20130415.bam
21012	HG03499.mapped.ILLUMINA.bwa.ESN.low_coverage.20130415.bam	HG03499	1	ALL	BAM	0.00269	0.00251	835395	7.75	0.50005	0.00016	0.50085	0.00023	7.759	0.999	ESN.wgs.coriell_phase3_samples.20121126.snps.affy_6.genotypes.vcf.gz	PASS	2013-05-03 05:53:20	/nfs/1000g-archive/vol1/ftp/data/HG03499/alignment/HG03499.mapped.ILLUMINA.bwa.ESN.low_coverage.20130415.bam		HG03499.mapped.ILLUMINA.bwa.ESN.low_coverage.20130415.bam
22412	HG03685.mapped.ILLUMINA.bwa.STU.low_coverage.20130415.bam	HG03685	1	ALL	BAM	0.00269	0	1753219	9.11	0.50141	0.00016	0	0	0	0	ALL.omni_wg_2141_filtered.vcf.gz	PASS	2013-05-03 10:34:02	/nfs/1000g-archive/vol1/ftp/data/HG03685/alignment/HG03685.mapped.ILLUMINA.bwa.STU.low_coverage.20130415.bam		HG03685.mapped.ILLUMINA.bwa.STU.low_coverage.20130415.bam
47148	HG03864.mapped.ILLUMINA.bwa.ITU.low_coverage.20130415.bam	HG03864	1	ALL	BAM	0.00269	0	1753219	11.9	0.50108	0.00022	0	0	0	0	ALL.omni_wg_2141_filtered.vcf.gz	PASS	2013-05-10 14:26:39	/nfs/1000g-archive/vol1/ftp/data/HG03864/alignment/HG03864.mapped.ILLUMINA.bwa.ITU.low_coverage.20130415.bam		HG03864.mapped.ILLUMINA.bwa.ITU.low_coverage.20130415.bam
43484	HG03948.mapped.ILLUMINA.bwa.STU.low_coverage.20130415.bam	HG03948	0	ALL	BAM	0.00268	0.00342	779732	10.13	0.50125	0.00023	0.50045	0.00013	10.158	0.9969	STU.wgs.coriell_phase3_samples.20121126.snps.affy_6.genotypes.vcf.gz	PASS	2013-05-10 11:36:30	/nfs/1000g-archive/vol1/ftp/data/HG03948/alignment/HG03948.mapped.ILLUMINA.bwa.STU.low_coverage.20130415.bam		HG03948.mapped.ILLUMINA.bwa.STU.low_coverage.20130415.bam
12097	HG04155.mapped.ILLUMINA.bwa.BEB.low_coverage.20121211.bam	HG04155	1	ALL	BAM	0.00268	0.00296	783628	6.08	0.50023	3e-05	0.50068	7e-05	6.066	1.0217	BEB.wgs.coriell_phase3_samples.20121126.snps.affy_6.genotypes.vcf.gz	PASS	2013-05-16 11:37:03	/nfs/1000g-archive/vol1/ftp/data/HG04155/alignment/HG04155.mapped.ILLUMINA.bwa.BEB.low_coverage.20121211.bam		HG04155.mapped.ILLUMINA.bwa.BEB.low_coverage.20121211.bam
8825	HG02389.mapped.ILLUMINA.bwa.CDX.low_coverage.20120522.bam	HG02389	1	ALL	BAM	0.00268	0.00273	1235978	5.92	0.50171	0.00013	0.50193	0.00022	5.923	1.0035	CDX.omni_wg_2141_filtered.vcf.gz	PASS	2013-05-17 03:23:20	/nfs/1000g-archive/vol1/ftp/data/HG02389/alignment/HG02389.mapped.ILLUMINA.bwa.CDX.low_coverage.20120522.bam		HG02389.mapped.ILLUMINA.bwa.CDX.low_coverage.20120522.bam
10231	HG02375.mapped.ILLUMINA.bwa.CDX.low_coverage.20120522.bam	HG02375	1	ALL	BAM	0.00268	0.0027	1235978	6.82	0.50131	0.00016	0.50164	0.00023	6.829	1.0011	CDX.omni_wg_2141_filtered.vcf.gz	PASS	2013-05-17 06:50:07	/nfs/1000g-archive/vol1/ftp/data/HG02375/alignment/HG02375.mapped.ILLUMINA.bwa.CDX.low_coverage.20120522.bam		HG02375.mapped.ILLUMINA.bwa.CDX.low_coverage.20120522.bam
9606	HG02402.mapped.ILLUMINA.bwa.CDX.low_coverage.20120522.bam	HG02402	1	ALL	BAM	0.00268	0.00259	1235978	5.87	0.50171	0.00013	0.50123	0.00027	5.871	1.0019	CDX.omni_wg_2141_filtered.vcf.gz	PASS	2013-05-17 07:43:03	/nfs/1000g-archive/vol1/ftp/data/HG02402/alignment/HG02402.mapped.ILLUMINA.bwa.CDX.low_coverage.20120522.bam		HG02402.mapped.ILLUMINA.bwa.CDX.low_coverage.20120522.bam
50633	NA20515.mapped.ILLUMINA.bwa.TSI.low_coverage.20130415.bam	NA20515	1	ALL	BAM	0.00268	0.00256	1402149	5.94	0.50125	0.00029	0.50165	0.00034	5.949	0.9976	TSI.omni_wg_2141_filtered.vcf.gz	PASS	2013-05-10 23:32:35	/nfs/1000g-archive/vol1/ftp/data/NA20515/alignment/NA20515.mapped.ILLUMINA.bwa.TSI.low_coverage.20130415.bam		NA20515.mapped.ILLUMINA.bwa.TSI.low_coverage.20130415.bam
9066	HG02029.mapped.ILLUMINA.bwa.KHV.low_coverage.20120522.bam	HG02029	1	ALL	BAM	0.00268	0.00251	1241587	7.37	0.50175	0.00044	0.50202	0.00058	7.378	1.0018	KHV.omni_wg_2141_filtered.vcf.gz	PASS	2013-05-17 09:39:02	/nfs/1000g-archive/vol1/ftp/data/HG02029/alignment/HG02029.mapped.ILLUMINA.bwa.KHV.low_coverage.20120522.bam		HG02029.mapped.ILLUMINA.bwa.KHV.low_coverage.20120522.bam
9162	NA19444.mapped.ILLUMINA.bwa.LWK.low_coverage.20120522.bam	NA19444	0	ALL	BAM	0.00268	0.00137	1570264	3.05	0.50192	0.00045	0.50304	0.00083	3.05	0.9993	LWK.omni_wg_2141_filtered.vcf.gz	PASS	2013-05-16 20:46:47	/nfs/1000g-archive/vol1/ftp/data/NA19444/alignment/NA19444.mapped.ILLUMINA.bwa.LWK.low_coverage.20120522.bam		NA19444.mapped.ILLUMINA.bwa.LWK.low_coverage.20120522.bam
14468	HG02511.mapped.ILLUMINA.bwa.ACB.low_coverage.20130415.bam	HG02511	1	ALL	BAM	0.00268	0	849391	5.11	0.50109	0.00047	0	0	0	0	ACB.wgs.coriell_phase3_samples.20121126.snps.affy_6.genotypes.vcf.gz	PASS	2013-04-30 17:01:11	/nfs/1000g-archive/vol1/ftp/data/HG02511/alignment/HG02511.mapped.ILLUMINA.bwa.ACB.low_coverage.20130415.bam		HG02511.mapped.ILLUMINA.bwa.ACB.low_coverage.20130415.bam
12226	NA19017.mapped.ILLUMINA.bwa.LWK.low_coverage.20121211.bam	NA19017	1	ALL	BAM	0.00268	0	887456	9.56	0.50113	0.00024	0	0	0	0	ALL.wgs.coriell_phase3_samples.20121126.snps.affy_6.genotypes.vcf.gz	PASS	2013-05-16 18:52:21	/nfs/1000g-archive/vol1/ftp/data/NA19017/alignment/NA19017.mapped.ILLUMINA.bwa.LWK.low_coverage.20121211.bam		NA19017.mapped.ILLUMINA.bwa.LWK.low_coverage.20121211.bam
20910	HG03105.mapped.ILLUMINA.bwa.ESN.low_coverage.20130415.bam	HG03105	1	ALL	BAM	0.00267	0.00273	835395	8.26	0.49956	6e-05	0.50016	4e-05	8.269	0.9979	ESN.wgs.coriell_phase3_samples.20121126.snps.affy_6.genotypes.vcf.gz	PASS	2013-05-03 05:40:14	/nfs/1000g-archive/vol1/ftp/data/HG03105/alignment/HG03105.mapped.ILLUMINA.bwa.ESN.low_coverage.20130415.bam		HG03105.mapped.ILLUMINA.bwa.ESN.low_coverage.20130415.bam
9619	HG01565.mapped.ILLUMINA.bwa.PEL.low_coverage.20120522.bam	HG01565	1	ALL	BAM	0.00267	0.00197	1304517	4.5	0.50214	0.00064	0.50212	0.00052	4.506	0.9997	PEL.omni_wg_2141_filtered.vcf.gz	PASS	2013-05-17 10:53:15	/nfs/1000g-archive/vol1/ftp/data/HG01565/alignment/HG01565.mapped.ILLUMINA.bwa.PEL.low_coverage.20120522.bam		HG01565.mapped.ILLUMINA.bwa.PEL.low_coverage.20120522.bam
9016	HG01817.mapped.ILLUMINA.bwa.CDX.low_coverage.20120522.bam	HG01817	1	ALL	BAM	0.00267	0	665690	6.68	0.50075	0.00059	0	0	0	0	CDX.wgs.coriell_phase3_samples.20121126.snps.affy_6.genotypes.vcf.gz	PASS	2013-05-16 14:03:01	/nfs/1000g-archive/vol1/ftp/data/HG01817/alignment/HG01817.mapped.ILLUMINA.bwa.CDX.low_coverage.20120522.bam		HG01817.mapped.ILLUMINA.bwa.CDX.low_coverage.20120522.bam
9164	HG02396.mapped.ILLUMINA.bwa.CDX.low_coverage.20120522.bam	HG02396	1	ALL	BAM	0.00267	0	665690	5.67	0.50221	0.00068	0	0	0	0	CDX.wgs.coriell_phase3_samples.20121126.snps.affy_6.genotypes.vcf.gz	PASS	2013-05-16 13:07:05	/nfs/1000g-archive/vol1/ftp/data/HG02396/alignment/HG02396.mapped.ILLUMINA.bwa.CDX.low_coverage.20120522.bam		HG02396.mapped.ILLUMINA.bwa.CDX.low_coverage.20120522.bam
[truncated: 4,359 more rows]

## Sheet: Tabelle2
sample	pop	super_pop	gender
HG00096	GBR	EUR	male
HG00097	GBR	EUR	female
HG00099	GBR	EUR	female
HG00100	GBR	EUR	female
HG00101	GBR	EUR	male
HG00102	GBR	EUR	female
HG00103	GBR	EUR	male
HG00105	GBR	EUR	male
HG00106	GBR	EUR	female
HG00107	GBR	EUR	male
HG00108	GBR	EUR	male
HG00109	GBR	EUR	male
[truncated: 2,492 more rows]
