# Supplementary material for: Contamination detection in sequencing studies using the mitochondrial phylogeny
Source: HighWire-hosted journal article supplement (doi:10.1101/gr.256545.119), 2021-01-15

**Supplemental Figure S1** - Haplocheck provides a graphical HTML Report including results of all uploaded samples. A table including metrics for each sample like contamination status, level and coverage is generated. By clicking on “Phylogenetic Tree”, the sample-specific tree can be visualized and navigated.

**
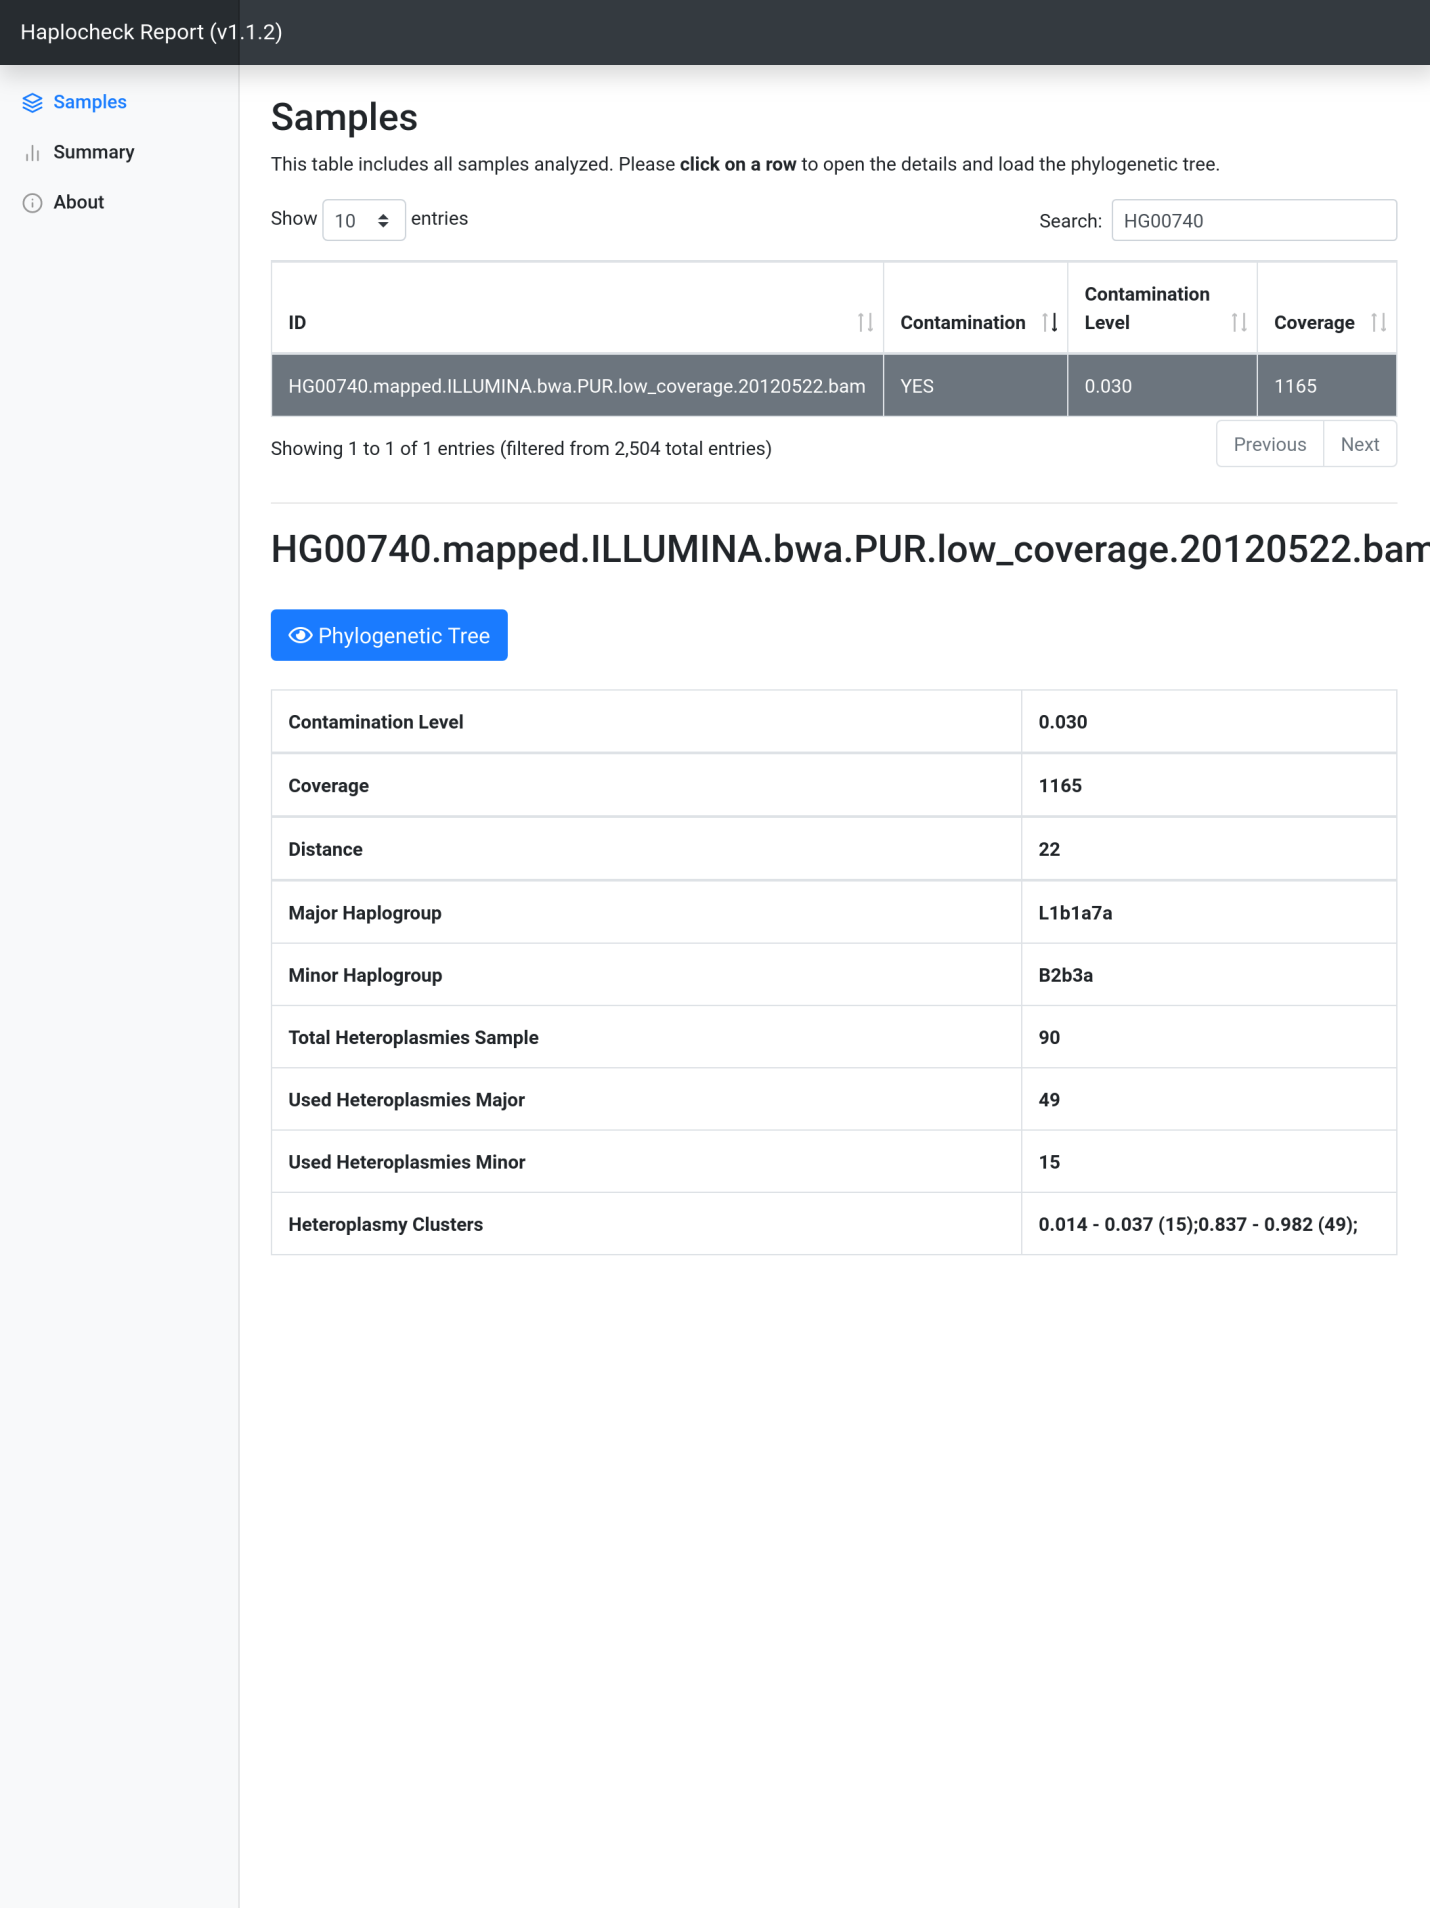
**


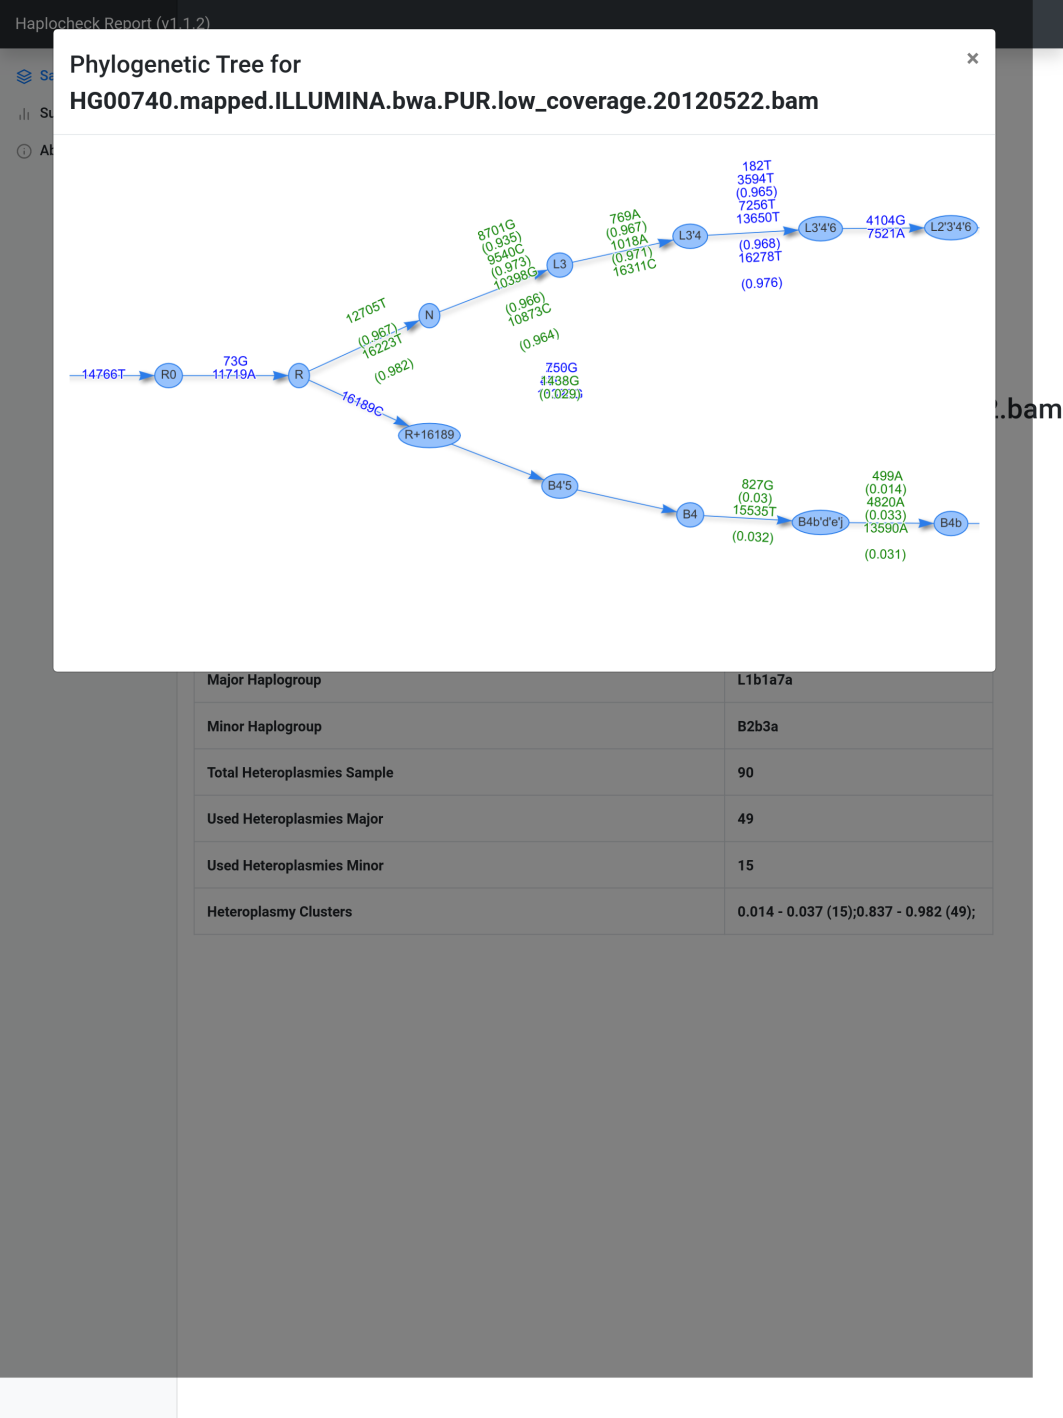

Supplement: Supplemental_Figure_S1.docx [file Supplemental_Figure_S1.docx]
