# Supplementary material for: Contamination detection in sequencing studies using the mitochondrial phylogeny
Source: HighWire-hosted journal article supplement (doi:10.1101/gr.256545.119), 2021-01-15

**Supplemental Figure 2:** Tested haplocheck setups (=lines) to determine the best trade-off between noise and overall accuracy. Setup 3 (phylogenetic distance >= 2, amount of polymorphic sites >= 2, haplogroup quality > 0.5, Kulczynski Metric) shows the best trade-off for all 6 datasets. Each dataset consists of 500.000 mixtures (Overall Phylogeny) and 100.000 mixtures (Haplogroup H subtree) respectively. The x-axis includes the amount of noise, the y-axis the calculated F1-Score (scale from 0 to 1, where 1 [equates](https://dict.leo.org/german-english/equates) to a perfect precision and recall).


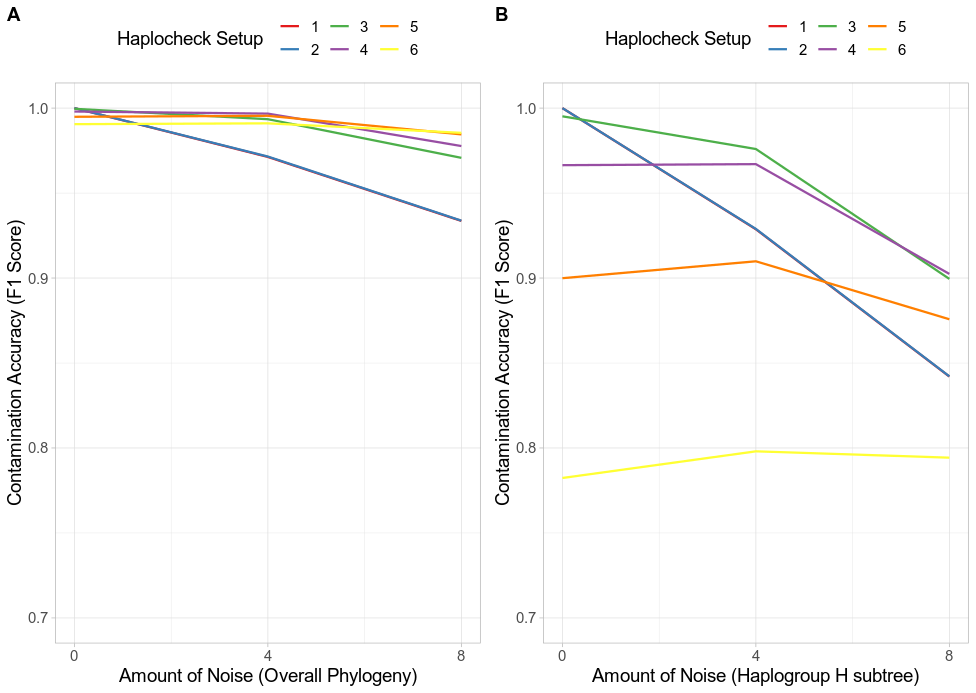

Supplement: Supplemental_Figure_S2.docx [file Supplemental_Figure_S2.docx]
