# Supplementary material for: Contamination detection in sequencing studies using the mitochondrial phylogeny
Source: HighWire-hosted journal article supplement (doi:10.1101/gr.256545.119), 2021-01-15

**Supplemental Figure S3** - Comparing the Haplogroup Quality derived from HaploGrep2. 98 % of the samples show an identical haplogroup between mutserve (x-axis) callMom (y-axis). Quality score ranges between 0.5 (lowest quality) up to 1 (perfect haplogroup match). The majority of the haplogroups show a good haplogroup quality of > 0.9 for both approaches. Colors representing macro haplogroups (not reflecting age of haplogroups, see U vs K, where K is a subgroup of U).


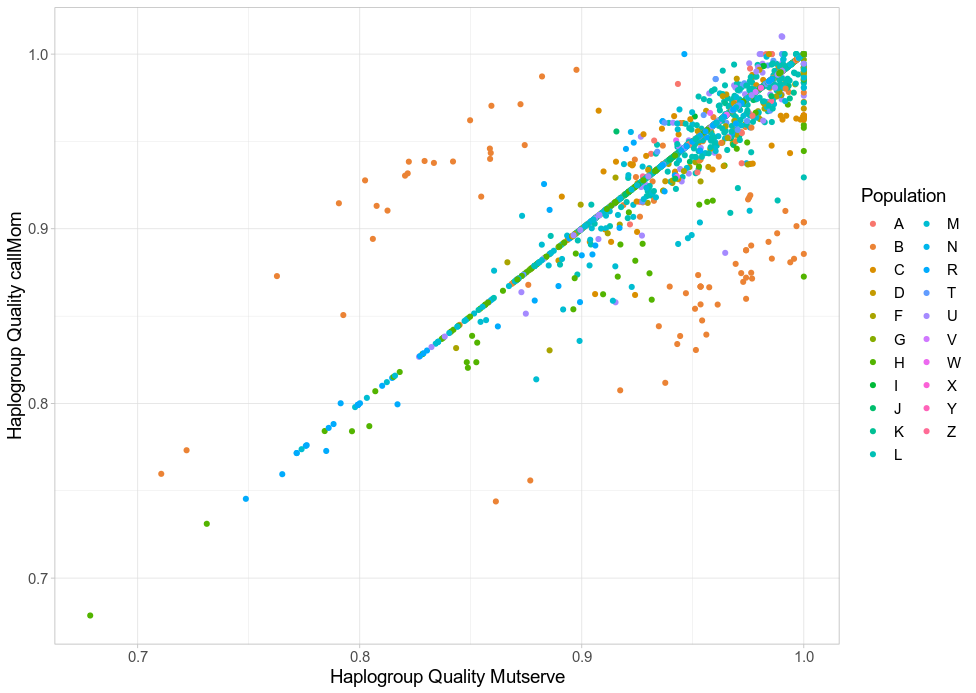

Supplement: Supplemental_Figure_S3.docx [file Supplemental_Figure_S3.docx]
