# Supplementary material for: Contamination detection in sequencing studies using the mitochondrial phylogeny
Source: HighWire-hosted journal article supplement (doi:10.1101/gr.256545.119), 2021-01-15
Supplement: Supplemental_Figure_S4.docx [file Supplemental_Figure_S4.docx]

**Supplemental Figure S4** - Differences in mitochondrial copy number (mtCN) for tissues blood and LCL found in 1000 Genomes Project Phase 3 (n=2,504). Tissue information was available for 870 samples (34.7%).

**
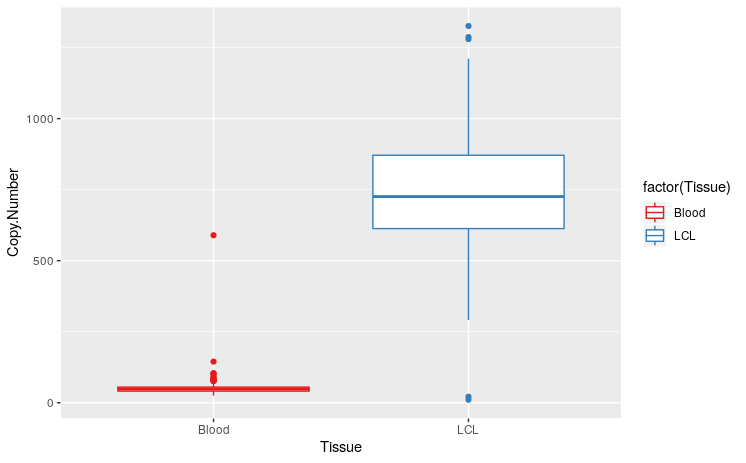
**
