# Supplementary material for: Contamination detection in sequencing studies using the mitochondrial phylogeny
Source: HighWire-hosted journal article supplement (doi:10.1101/gr.256545.119), 2021-01-15
Supplement: Supplemental_Table_S1.xlsx [file Supplemental_Table_S1.xlsx]

## Sheet: Sheet1
Supplemental Table S1 - 4 different samples mixtures are included (0.5%-50% each), each showing a different phylogenetic distance. Haplocheck is able to detect contamination for different mixtures indepdent of distances within the included haplotypes.
Sample Mixture	Distance Nodes
L0f2b / K1f	23
H1a1a / H1a8a	3
H1a1a1 / H1a1b (Fig 1)	4
H1c6 / U5a2e	13
L0f2b_K1f	Distance 23
Coverage		Mixture
Simulated	Effective (mean)	0.005	0.007	0.01	0.02	0.03	0.05	0.1	0.25	0.3	0.4	0.45	0.47	0.48
5000	4750.87	0.006	0.007	0.011	0.02	0.03	0.051	0.103	0.252	0.301	0.401	0.45	0.474	0.482
3000	2859	0.006	0.008	0.01	0.02	0.03	0.05	0.101	0.25	0.302	0.4	0.45	0.469	0.482
2500	2384.87	0.006	0.007	0.011	0.02	0.029	0.049	0.102	0.253	0.302	0.403	0.449	0.468	0.478
2000	1909	0.006	0.007	0.01	0.019	0.03	0.052	0.101	0.254	0.303	0.399	0.453	0.47	0.477
1500	1434.13	0.006	0.008	0.01	0.02	0.03	0.05	0.102	0.249	0.3	0.399	0.452	0.47	0.48
1250	1194.2	ND	0.008	0.011	0.019	0.031	0.05	0.102	0.252	0.304	0.405	0.448	0.475	0.48
1000	955.467	ND	0.008	0.011	0.021	0.028	0.053	0.1	0.25	0.304	0.401	0.449	0.475	0.478
750	715.267	ND	ND	0.012	0.02	0.029	0.05	0.102	0.249	0.298	0.401	0.453	0.466	0.476
500	476.133	ND	ND	ND	0.021	0.03	0.051	0.096	0.249	0.298	0.404	0.453	0.468	0.464
250	238.4	ND	ND	ND	ND	ND	0.049	0.097	0.252	0.292	0.404	0.448	0.459	0.465
100	94.8667	ND	ND	ND	ND	ND	ND	0.105	0.248	0.302	0.396	0.44	0.448	0.455
75	71.6	ND	ND	ND	ND	ND	ND	0.119	0.246	0.298	0.382	0.428	0.426	ND
50	47	ND	ND	ND	ND	ND	ND	ND	0.242	0.311	0.37	0.421	0.448	ND
25	24.4667	ND	ND	ND	ND	ND	ND	ND	ND	ND	ND	ND	ND	ND
10	9.53333	ND	ND	ND	ND	ND	ND	ND	ND	ND	ND	ND	ND	ND
H1a1a- H1a8a	Distance 4
Coverage		Mixture
Simulated	Effective (mean)	0.005	0.007	0.01	0.02	0.03	0.05	0.1	0.25	0.3	0.4	0.45	0.47	0.48
5000	4345.07	0.006	0.007	0.01	0.02	0.034	0.051	0.095	0.253	0.294	0.383	0.448	0.48	0.486
3000	2607.27	0.006	0.006	0.01	0.02	0.029	0.049	0.097	0.256	0.303	0.393	0.441	0.47	0.476
2500	2171.87	0.004	0.006	0.012	0.019	0.028	0.049	0.097	0.258	0.308	0.393	0.456	0.471	0.492
2000	1737.53	0.006	0.009	0.012	0.016	0.03	0.046	0.109	0.246	0.288	0.397	0.455	0.472	0.483
1500	1310.87	0.005	0.008	0.008	0.016	0.026	0.05	0.093	0.237	0.298	0.376	0.456	0.468	0.48
1250	1101.87	0.007	0.01	0.01	0.022	0.031	0.052	0.099	0.24	0.289	0.388	0.454	0.475	0.474
1000	895.6	ND	0.01	0.012	0.02	0.036	0.042	0.107	0.267	0.284	0.405	0.424	0.48	0.485
750	677.533	ND	ND	0.014	0.016	0.027	0.049	0.105	0.23	0.287	0.383	0.449	0.456	0.422
500	448.8	ND	ND	ND	0.022	0.042	0.058	0.121	0.239	0.325	0.391	0.437	0.47	0.43
250	221.133	ND	ND	ND	0.034	0.049	0.047	0.105	0.259	0.303	0.419	0.423	0.458	0.482
100	89.2	ND	ND	ND	ND	ND	ND	ND	0.138	0.293	0.405	0.462	0.47	0.445
75	64.9333	ND	ND	ND	ND	ND	ND	ND	0.155	0.264	0.351	0.368	0.45	0.47
50	44.0667	ND	ND	ND	ND	ND	ND	ND	0.171	0.237	0.303	0.417	0.458	0.462
25	22.2667	ND	ND	ND	ND	ND	ND	ND	ND	0.308	0.406	0.429
10	8.33333	ND	ND	ND	ND	ND	ND	ND	ND	ND	ND
H1a1a1-H1a1b (Fig 1)	Distance 3
Coverage		Mixture
Simulated	Effective (mean)	0.005	0.007	0.01	0.02	0.03	0.05	0.1	0.25	0.3	0.4	0.45	0.47	0.48
5000	4280.87	0.008	0.006	0.012	0.02	0.028	0.054	0.098	0.236	0.304	0.397	0.454	0.47	0.482
3000	2562.73	0.006	0.007	0.01	0.019	0.026	0.051	0.106	0.258	0.303	0.384	0.46	0.475	0.466
2500	2133.93		0.008	0.01	0.017	0.032	0.05	0.099	0.255	0.307	0.412	0.447	0.451	0.473
2000	1738.2	0.006	0.008	0.01	0.022	0.028	0.052	0.101	0.252	0.292	0.391	0.458	0.473	0.475
1500	1296.53	0.006	0.008	0.01	0.022	0.034	0.05	0.104	0.237	0.31	0.377	0.456	0.476	0.476
1250	1093.2	ND	0.006	0.01	0.015	0.021	0.05	0.101	0.248	0.31	0.385	0.436	0.498	0.478
1000	886	ND	0.011	ND	0.016	0.025	0.042	0.099	0.238	0.312	0.415	0.452	0.465	0.474
750	675.4	ND	ND	ND	0.024	0.028	0.066	0.091	0.218	0.286	0.406		0.466	0.458
500	448	ND	ND	0.015	ND	0.028	0.046	0.116	0.233	0.299	0.383	0.444	0.468	0.466
250	222.133	ND	ND	ND	0.033	0.032	0.041	0.089	0.26	0.323	0.363	0.434	0.433	0.443
100	89.4	ND	ND	ND	ND	ND	ND	0.095	0.305	0.33	0.387	0.422	0.403
75	66.6667	ND	ND	ND	ND	ND	ND	0.119	0.277	0.278	0.391	0.468		0.477
50	44.6667	ND	ND	ND	ND	ND	ND	ND	0.193	0.303	0.39	0.455	0.43	0.452
25	22	ND	ND	ND	ND	ND	ND	ND	ND	ND	ND		0.457	0.324
10	8.73333	ND	ND	ND	ND	ND	ND	ND	ND	ND	ND
H1c6-U5a2e	Distance 13
Coverage		Mixture
Simulated	Effective (mean)	0.005	0.007	0.01	0.02	0.03	0.05	0.1	0.25	0.3	0.4	0.45	0.47	0.48
5000	4601.53	0.007	0.007	0.01	0.022	0.035	0.052	0.101	0.26	0.297	0.406	0.449	0.46	0.471
3000	2781.67	0.008	0.007	0.009	0.024	0.033	0.056	0.102	0.254	0.299	0.404	0.457	0.475	0.474
2500	2314.2	0.007	0.006	0.011	0.019	0.031	0.052	0.099	0.256	0.289	0.393	0.464	0.475	0.477
2000	1865.13	0.007	0.008	0.01	0.023	0.036	0.049	0.103	0.248	0.288	0.413	0.445	0.451	0.482
1500	1399.53	0.006	0.009	0.009	0.024	0.033	0.045	0.093	0.229	0.3	0.396	0.45	0.464	0.487
1250	1174.4	0.005	0.008	0.013	0.016	0.027	0.056	0.104	0.261	0.298	0.398	0.456	0.471	0.462
1000	949.467	ND	0.009	0.009	0.018	0.035	0.049	0.105	0.254	0.297	0.408	0.449	0.465	0.478
750	716.133	ND	ND	ND	0.023	0.02	0.057	0.095	0.262	0.281	0.404	0.439	0.465	0.453
500	478.733	ND	ND	ND	0.021	0.038	0.042	0.102	0.236	0.304	0.375	0.458	0.45	0.456
250	239.267	ND	ND	ND	0.018	0.038	0.039	0.091	0.206	0.286	0.388	0.403	0.451	0.462
100	95.2667	ND	ND	ND	ND	ND	0.072	0.102	0.248	0.267	0.314	0.451	0.449	0.318
75	73.6	ND	ND	ND	ND	ND	ND	0.115	0.224	0.328	0.393	0.434	0.483	0.471
50	48.6	ND	ND	ND	ND	0.104	ND	0.115	0.232	0.283	0.381	0.343	0.476	0.436
25	24.5333	ND	ND	ND	ND	ND	ND	ND	ND	ND	0.424		0.448
10	9.26667	ND	ND	ND	ND	ND	ND	ND	ND	ND	ND
