# Supplementary material for: Contamination detection in sequencing studies using the mitochondrial phylogeny
Source: HighWire-hosted journal article supplement (doi:10.1101/gr.256545.119), 2021-01-15
Supplement: Supplemental_Table_S2.xlsx [file Supplemental_Table_S2.xlsx]

## Sheet: Sheet1
	Raw Data
	Supplemental Table S2 - Raw data for 4 different mixture samples (using 2 samples from 1000 Genomes Project) which have been used to create different mixtures (1-10%) and analyzed using VerifyBamID and haplocheck. To test different setups, each sample mixture includes a different mtCN ratio. The summary is included in the main manuscript as Table 3.
	Component 1			Component 2			Mix		Detected Contamination Level					Difference between detected Contamination Level and Mix-Ratio
	Sample	Reads	Copy Number	Sample	Reads	Copy Number	Reads	Ratio	HGPD_100K	HGDP_10K	1000G_100K	1000G_10K	Haplocheck	HGPD_100K	HGDP_10K	1000G_100K	1000G_10K	Haplocheck
Sample 2	HG00173	121352133	593.855	HG00183	1122450	729.24	122474583	0.00916476	0.00786948	0.00838619	0.00620033	0.0117855	0.014	-0.00129528	-0.000778569	-0.00296443	0.00262074	0.00483524
	HG00173	121352133	593.855	HG00183	2244776	729.24	123596909	0.0181621	0.0161759	0.0156152	0.015387	0.0194064	0.026	-0.00198617	-0.00254687	-0.00277507	0.00124433	0.00783793
	HG00173	121352133	593.855	HG00183	3366953	729.24	124719086	0.0269963	0.0246381	0.027374	0.0219031	0.0259605	0.037	-0.00235819	0.000377707	-0.00509319	-0.00103579	0.0100037
	HG00173	121352133	593.855	HG00183	11231615	729.24	132583748	0.0847134	0.0800511	0.0842823	0.0758682	0.0768945	0.115	-0.00466226	-0.000431062	-0.00884516	-0.00781886	0.0302866
	HG00173	121352133	593.855	HG00183	112312662	729.24	233664795	0.480657	0.374056	0.358356	0.398559	0.382701	0.455	-0.106601	-0.122301	-0.0820982	-0.0979562	-0.0256572
Sample 4	HG01988	116881484	68.9119	HG00183	1122450	729.24	118003934	0.00951197	0.0113407	0.0107863	0.00907665	0.00717638	0.098	0.00182873	0.00127433	-0.000435321	-0.00233559	0.088488
	HG01988	116881484	68.9119	HG00183	2244776	729.24	119126260	0.0188437	0.0197802	0.0182886	0.0180781	0.0175337	0.172	0.000936529	-0.000555071	-0.000765571	-0.00130997	0.153156
	HG01988	116881484	68.9119	HG00183	3366953	729.24	120248437	0.028	0.0279961	0.0258376	0.026792	0.0247592	0.238	-3.87309e-06	-0.00216237	-0.00120797	-0.00324077	0.21
	HG01988	116881484	68.9119	HG00183	11231615	729.24	128113099	0.0876695	0.0838942	0.0865735	0.0814273	0.0800659	0.47	-0.00377533	-0.00109603	-0.00624223	-0.00760363	0.38233
	HG01988	116881484	68.9119	HG00183	112312662	729.24	229194146	0.490033	0.415462	0.397866	0.433507	0.436883	0.923	-0.0745709	-0.0921669	-0.0565259	-0.0531499	0.432967
Sample 3	HG00183	112312662	729.24	HG01988	1168133	68.9119	113480795	0.0102937	0.00416408	0.00579367	0.00599154	0.0067922	0	-0.00612958	-0.00449999	-0.00430212	-0.00350146	-0.0102937
	HG00183	112312662	729.24	HG01988	2336896	68.9119	114649558	0.0203829	0.0145607	0.0129661	0.0157303	0.0144978	0	-0.00582225	-0.00741685	-0.00465265	-0.00588515	-0.0203829
	HG00183	112312662	729.24	HG01988	3506378	68.9119	115819040	0.0302746	0.0242376	0.0252017	0.0248052	0.0247423	0	-0.00603702	-0.00507292	-0.00546942	-0.00553232	-0.0302746
	HG00183	112312662	729.24	HG01988	11685072	68.9119	123997734	0.0942362	0.0859378	0.0849098	0.0885652	0.0847223	0.007	-0.00829837	-0.00932637	-0.00567097	-0.00951387	-0.0872362
	HG00183	112312662	729.24	HG01988	116881484	68.9119	229194146	0.509967	0.415462	0.397866	0.433507	0.436883	0.077	-0.0945051	-0.112101	-0.0764601	-0.0730841	-0.432967
Sample 1	HG00580	163116201	543.284	HG00701	1706445	543	164822646	0.0103532	0.00683982	0.00734111	0.00807218	0.0118014	0.014	-0.0035134	-0.00301211	-0.00228104	0.00144818	0.00364678
	HG00580	163116201	543.284	HG00701	3414738	543	166530939	0.0205051	0.0144413	0.0140837	0.0180578	0.0225287	0.025	-0.00606383	-0.00642143	-0.00244733	0.00202357	0.00449487
	HG00580	163116201	543.284	HG00701	5122538	543	168238739	0.030448	0.0239261	0.0264502	0.0279355	0.032609	0.036	-0.00652193	-0.00399783	-0.00251253	0.00216097	0.00555197
	HG00580	163116201	543.284	HG00701	17070004	543	180186205	0.0947354	0.0767028	0.0876552	0.088509	0.0935805	0.099	-0.0180326	-0.00708015	-0.00622635	-0.00115485	0.00426465
	HG00580	163116201	543.284	HG00701	170776049	543	333892250	0.511471	0.376838	0.371697	0.45552	0.451234	0.475	-0.134633	-0.139774	-0.0559505	-0.0602365	-0.0364705
	Summary
	Average of difference between detected contamination level und mix ratio
		HGPD_100K	HGDP_10K	1000G_100K	1000G_10K	Haplocheck	Sample CN Ratio		Major	Minor
	AVG Mixture 1	-0.00853293	-0.00512788	-0.00336681	0.00111947	0.00448957	1.00052	1:1	HG00580	HG00701_01 - HG00701_10
	AVG Mixture 2	-0.00257548	-0.000844699	-0.00491946	-0.0012474	0.0132409	0.814348	0.8:1	HG00173	HG00183_01 - HG00183_10
	AVG Mixture 3	-0.00657181	-0.00657903	-0.00502379	-0.0061082	-0.0370469	10.5822	10:1	HG00183	HG01988_01 - HG01988_10
	AVG Mixture 4	-0.000253486	-0.000634786	-0.00216277	-0.00362249	0.208494	0.0944983	01:10:00	HG01988	HG00183_01 - HG00183_10
