# Supplementary material for: Contamination detection in sequencing studies using the mitochondrial phylogeny
Source: HighWire-hosted journal article supplement (doi:10.1101/gr.256545.119), 2021-01-15
Supplement: Supplemental_Table_S3.docx [file Supplemental_Table_S3.docx]

**Supplemental Table S3** -127 contaminated samples in 1000 Genomes Phase 3 (n=2,504 using haplocheck. Results sorted by reported contamination level.

| **Sample** | **Haplocheck Contamination Level** |
| --- | --- |
| NA18502 | 0.008 |
| HG02819 | 0.009 |
| HG00120 | 0.01 |
| HG00457 | 0.01 |
| HG03931 | 0.01 |
| NA07357 | 0.01 |
| NA19067 | 0.01 |
| NA19147 | 0.01 |
| HG02180 | 0.011 |
| NA07037 | 0.011 |
| NA18951 | 0.011 |
| NA18956 | 0.011 |
| NA19455 | 0.011 |
| NA20778 | 0.011 |
| HG00140 | 0.012 |
| HG00258 | 0.012 |
| HG02154 | 0.012 |
| NA12044 | 0.012 |
| NA18907 | 0.012 |
| NA18983 | 0.012 |
| NA19085 | 0.012 |
| NA19445 | 0.012 |
| NA19452 | 0.012 |
| NA20759 | 0.012 |
| HG00131 | 0.013 |
| HG00155 | 0.013 |
| HG01489 | 0.013 |
| NA18944 | 0.013 |
| NA19657 | 0.013 |
| HG00126 | 0.014 |
| HG03108 | 0.014 |
| NA18538 | 0.014 |
| NA19084 | 0.014 |
| NA20528 | 0.014 |
| NA20531 | 0.014 |
| NA20869 | 0.014 |
| HG00245 | 0.015 |
| HG02179 | 0.015 |
| HG03594 | 0.015 |
| NA12006 | 0.015 |
| NA19704 | 0.015 |
| NA20861 | 0.015 |
| HG00262 | 0.016 |
| HG00264 | 0.016 |
| HG02165 | 0.016 |
| NA12776 | 0.016 |
| NA19703 | 0.016 |
| HG00367 | 0.018 |
| HG01176 | 0.018 |
| HG01789 | 0.018 |
| HG03061 | 0.018 |
| HG03063 | 0.018 |
| NA07048 | 0.018 |
| NA18990 | 0.018 |
| NA19707 | 0.018 |
| NA20853 | 0.018 |
| HG01503 | 0.019 |
| HG03246 | 0.019 |
| HG00157 | 0.02 |
| HG02185 | 0.021 |
| NA20508 | 0.021 |
| NA20846 | 0.021 |
| NA20859 | 0.021 |
| HG01049 | 0.022 |
| NA20849 | 0.022 |
| NA20803 | 0.025 |
| HG02600 | 0.026 |
| NA18539 | 0.026 |
| NA19012 | 0.026 |
| HG01597 | 0.028 |
| HG02660 | 0.028 |
| HG02851 | 0.028 |
| HG02078 | 0.029 |
| HG00740 | 0.03 |
| HG01873 | 0.03 |
| HG03943 | 0.032 |
| HG03722 | 0.033 |
| HG02603 | 0.034 |
| HG02601 | 0.035 |
| HG02697 | 0.035 |
| HG03663 | 0.035 |
| HG02549 | 0.036 |
| HG02058 | 0.037 |
| HG02231 | 0.038 |
| HG02786 | 0.039 |
| HG02789 | 0.039 |
| HG02490 | 0.04 |
| HG02491 | 0.041 |
| NA20877 | 0.041 |
| HG03770 | 0.042 |
| HG03775 | 0.042 |
| HG03858 | 0.044 |
| HG01586 | 0.045 |
| HG02654 | 0.046 |
| HG02784 | 0.046 |
| HG02047 | 0.047 |
| HG02733 | 0.047 |
| HG01668 | 0.048 |
| HG02783 | 0.048 |
| HG02790 | 0.048 |
| HG02502 | 0.049 |
| HG01912 | 0.05 |
| HG02725 | 0.05 |
| HG01414 | 0.052 |
| HG02657 | 0.052 |
| HG03854 | 0.055 |
| HG02604 | 0.056 |
| HG02658 | 0.058 |
| HG02688 | 0.058 |
| HG02724 | 0.058 |
| HG02734 | 0.059 |
| HG01095 | 0.06 |
| HG03754 | 0.06 |
| HG01870 | 0.062 |
| HG02787 | 0.063 |
| HG02685 | 0.065 |
| HG03765 | 0.091 |
| HG04106 | 0.092 |
| HG01108 | 0.107 |
| HG01326 | 0.117 |
| HG03238 | 0.142 |
| HG03953 | 0.144 |
| HG03716 | 0.145 |
| HG02696 | 0.155 |
| HG03479 | 0.163 |
| HG03644 | 0.246 |
| HG03478 | 0.255 |
