# Supplementary material for: Contamination detection in sequencing studies using the mitochondrial phylogeny
Source: HighWire-hosted journal article supplement (doi:10.1101/gr.256545.119), 2021-01-15
Supplement: Supplemental_Table_S4.docx [file Supplemental_Table_S4.docx]

**Supplemental Table S4** - Haplocheck identified 74 contaminated samples (mtCN >=300) in the 1000 Genomes Phase 3 Project showing a Pearson correlation coefficient of 72%.

| **Sample** | **VerifyBamID  Level** | **mt copy number** | **Haplocheck Level** |
| --- | --- | --- | --- |
| HG01668 | 0.02643 | 545.1 | 0.048 |
| NA20877 | 0.02614 | 743.8 | 0.041 |
| HG02231 | 0.02543 | 456.8 | 0.038 |
| HG00740 | 0.02746 | 536.8 | 0.03 |
| HG01597 | 0.027 | 589.6 | 0.028 |
| HG02851 | 0.0174 | 935.2 | 0.028 |
| NA18539 | 0.01032 | 368.4 | 0.026 |
| NA19012 | 0.01317 | 535.5 | 0.026 |
| NA20803 | 0.01943 | 435.8 | 0.025 |
| HG01049 | 0.01258 | 386.9 | 0.022 |
| NA20849 | 0.0243 | 885.1 | 0.022 |
| HG02185 | 0.01749 | 639.9 | 0.021 |
| NA20508 | 0.01839 | 638.2 | 0.021 |
| NA20846 | 0.01839 | 880.9 | 0.021 |
| NA20859 | 0.0174 | 714.1 | 0.021 |
| HG00157 | 0.02388 | 594.9 | 0.02 |
| HG01503 | 0.02086 | 836.7 | 0.019 |
| HG03246 | 0.01032 | 1009.5 | 0.019 |
| HG00367 | 0.01363 | 854.1 | 0.018 |
| HG01789 | 0.0154 | 678.7 | 0.018 |
| HG03061 | 0.0056 | 866.4 | 0.018 |
| HG03063 | 0.01001 | 606.5 | 0.018 |
| NA07048 | 0.00742 | 497.6 | 0.018 |
| NA18990 | 0.01343 | 712.0 | 0.018 |
| NA19707 | 0.0072 | 378.8 | 0.018 |
| NA20853 | 0.01428 | 653.6 | 0.018 |
| HG00262 | 0.01421 | 678.0 | 0.016 |
| HG00264 | 0.01325 | 593.3 | 0.016 |
| HG02165 | 0.01888 | 956.3 | 0.016 |
| NA12776 | 0.01463 | 581.2 | 0.016 |
| NA19703 | 0.01246 | 451.3 | 0.016 |
| HG00245 | 0.01828 | 585.3 | 0.015 |
| HG02179 | 0.01128 | 707.9 | 0.015 |
| HG03594 | 0.00976 | 625.1 | 0.015 |
| NA12006 | 0.01043 | 470.7 | 0.015 |
| NA19704 | 0.0091 | 408.4 | 0.015 |
| NA20861 | 0.01144 | 687.4 | 0.015 |
| HG00126 | 0.01029 | 793.4 | 0.014 |
| HG03108 | 0.00841 | 616.5 | 0.014 |
| NA18538 | 0.00973 | 552.6 | 0.014 |
| NA19084 | 0.01036 | 797.2 | 0.014 |
| NA20528 | 0.01141 | 620.8 | 0.014 |
| NA20531 | 0.01742 | 630.2 | 0.014 |
| NA20869 | 0.01664 | 929.8 | 0.014 |
| HG00131 | 0.00738 | 521.2 | 0.013 |
| HG00155 | 0.00986 | 590.8 | 0.013 |
| HG01489 | 0.01838 | 567.3 | 0.013 |
| NA18944 | 0.01459 | 691.2 | 0.013 |
| NA19657 | 0.00897 | 404.2 | 0.013 |
| HG00140 | 0.00542 | 438.0 | 0.012 |
| HG00258 | 0.01112 | 739.5 | 0.012 |
| HG02154 | 0.00925 | 686.2 | 0.012 |
| NA12044 | 0.01073 | 939.3 | 0.012 |
| NA18907 | 0.00777 | 551.8 | 0.012 |
| NA18983 | 0.00556 | 385.8 | 0.012 |
| NA19085 | 0.00439 | 605.6 | 0.012 |
| NA19445 | 0.01025 | 519.9 | 0.012 |
| NA19452 | 0.00503 | 740.6 | 0.012 |
| NA20759 | 0.01208 | 702.1 | 0.012 |
| HG02180 | 0.01543 | 837.4 | 0.011 |
| NA07037 | 0.00686 | 462.8 | 0.011 |
| NA18951 | 0.00999 | 512.0 | 0.011 |
| NA18956 | 0.00577 | 308.0 | 0.011 |
| NA19455 | 0.00656 | 818.3 | 0.011 |
| NA20778 | 0.00696 | 607.2 | 0.011 |
| HG00120 | 0.01266 | 595.2 | 0.01 |
| HG00457 | 0.00805 | 598.3 | 0.01 |
| HG03931 | 0.00471 | 674.0 | 0.01 |
| NA07357 | 0.01832 | 914.6 | 0.01 |
| NA19067 | 0.00656 | 685.6 | 0.01 |
| NA19147 | 0.00815 | 395.7 | 0.01 |
| HG02819 | 0.00223 | 760.6 | 0.009 |
| NA18502 | 0.00775 | 718.0 | 0.008 |
