# Supplementary material for: Contamination detection in sequencing studies using the mitochondrial phylogeny
Source: HighWire-hosted journal article supplement (doi:10.1101/gr.256545.119), 2021-01-15
Supplement: Supplemental_Table_S5.docx [file Supplemental_Table_S5.docx]

**Supplemental Table S5** - Haplocheck identified 54 contaminated samples (mtCN<300) in the 1000 Genomes Phase 3 Project showing a Pearson correlation coefficient of 32%.

| **Sample** | **VerifyBamID Level** | **mt copy number** | **Haplocheck Level** |
| --- | --- | --- | --- |
| HG03478 | 0.00303 | 10.6 | 0.255 |
| HG03644 | 0.01958 | 62.4 | 0.246 |
| HG03479 | 0.00623 | 18.8 | 0.163 |
| HG02696 | 0.00803 | 30 | 0.155 |
| HG03716 | 0.0097 | 45 | 0.145 |
| HG03953 | 0.00009 | 43 | 0.144 |
| HG03238 | 0.00501 | 32.4 | 0.142 |
| HG01326 | 0.02398 | 60.7 | 0.117 |
| HG01108 | 0.00323 | 58 | 0.107 |
| HG04106 | 0.00192 | 35.8 | 0.092 |
| HG03765 | 0.00236 | 40.6 | 0.091 |
| HG02685 | 0.00471 | 44.3 | 0.065 |
| HG02787 | 0.00369 | 36.3 | 0.063 |
| HG01870 | 0.00013 | 46.4 | 0.062 |
| HG01095 | 0.00371 | 33.5 | 0.06 |
| HG03754 | 0.00791 | 59.8 | 0.06 |
| HG02734 | 0.00394 | 36.9 | 0.059 |
| HG02658 | 0.0065 | 65 | 0.058 |
| HG02688 | 0.00496 | 38.1 | 0.058 |
| HG02724 | 0.00399 | 45.1 | 0.058 |
| HG02604 | 0.00287 | 39.9 | 0.056 |
| HG03854 | 0.00355 | 44.8 | 0.055 |
| HG01414 | 0.00505 | 64.8 | 0.052 |
| HG02657 | 0.00499 | 49.3 | 0.052 |
| HG01912 | 0.02172 | 62.3 | 0.05 |
| HG02725 | 0.00415 | 49 | 0.05 |
| HG02502 | 0.00213 | 57 | 0.049 |
| HG02783 | 0.00491 | 41.7 | 0.048 |
| HG02790 | 0.01182 | 48.2 | 0.048 |
| HG02047 | 0.00527 | 42.9 | 0.047 |
| HG02733 | 0.00353 | 48.8 | 0.047 |
| HG02654 | 0.00462 | 43.6 | 0.046 |
| HG02784 | 0.00367 | 42.4 | 0.046 |
| HG01586 | 0.00004 | 56.1 | 0.045 |
| HG03858 | 0.00333 | 36.2 | 0.044 |
| HG03770 | 0.00449 | 43.7 | 0.042 |
| HG03775 | 0.00652 | 47.4 | 0.042 |
| HG02491 | 0.00375 | 58.4 | 0.041 |
| HG02490 | 0.00324 | 49.3 | 0.04 |
| HG02786 | 0.00453 | 53.4 | 0.039 |
| HG02789 | 0.00348 | 45.4 | 0.039 |
| HG02058 | 0.00059 | 52 | 0.037 |
| HG02549 | 0.00097 | 57 | 0.036 |
| HG02601 | 0.00421 | 57.8 | 0.035 |
| HG02697 | 0.00403 | 55.6 | 0.035 |
| HG03663 | 0.00039 | 38.3 | 0.035 |
| HG02603 | 0.00331 | 61.9 | 0.034 |
| HG03722 | 0.00382 | 59.2 | 0.033 |
| HG03943 | 0.00393 | 50.4 | 0.032 |
| HG01873 | 0.00007 | 34.1 | 0.03 |
| HG02078 | 0.00024 | 40.6 | 0.029 |
| HG02660 | 0.00376 | 62.5 | 0.028 |
| HG02600 | 0.0036 | 56.2 | 0.026 |
| HG01176 | 0.01246 | 56.2 | 0.018 |
