# Supplementary material for: Contamination detection in sequencing studies using the mitochondrial phylogeny
Source: HighWire-hosted journal article supplement (doi:10.1101/gr.256545.119), 2021-01-15
Supplement: Supplemental_Table_S6.docx [file Supplemental_Table_S6.docx]

**Supplemental Table S6** - Haplocheck identified 7 samples within the 1000 Genomes high-covearge data collection in a range between 0.9% - 1.7%.

| **Sample** | **Haplocheck Level** |
| --- | --- |
| HG00384 | 1.1% |
| HG00851 | 1.4% |
| HG01789 | 1.0% |
| HG01870 | 1.4% |
| HG03789 | 1.0% |
| NA12775 | 0.9% |
| NA19655 | 1.7% |
