# Supplementary material for: Contamination detection in sequencing studies using the mitochondrial phylogeny
Source: HighWire-hosted journal article supplement (doi:10.1101/gr.256545.119), 2021-01-15
Supplement: Supplemental_Table_S7.docx [file Supplemental_Table_S7.docx]

**Supplemental Table S7** – 11 excluded samples from the 1000 Genomes Project Phase 3. Applied Filters: vcf: *omni*, level > 3 %.

| **ID** | **VerifyBamID** | **Haplocheck** |
| --- | --- | --- |
| HG00098 | 0.09578 | 0.096 |
| HG00249 | 0.03262 | 0.044 |
| HG02436 | 0.03373 | 0.268 |
| HG02567 | 0.06406 | 0.087 |
| HG03721 | 0.33672 | 0.439 |
| HG03723 | 0.2768 | 0.41 |
| HG03725 | 0.33812 | 0.439 |
| NA11993 | 0.26551 | 0.276 |
| NA18576 | 0.11325 | 0.121 |
| NA20873 | 0.03086 | 0.035 |
| NA20883 | 0.05384 | 0.052 |
